# Supplementary material
Source: publisher figshare collection journal article supplement (https://acs.figshare.com/ndownloader/files/4038520)
Supplement: Supplementary file 1 [file 4038520]

  
data_bo-try-1 
  
_audit_creation_method            SHELXL-97 
_chemical_name_systematic 
; 
 ? 
; 
_chemical_name_common             ? 
_chemical_melting_point           ? 
_chemical_formula_moiety          
 'C36 H35 N5 O2, C2 H6 O' 
_chemical_formula_sum 
 'C38 H41 N5 O3' 
_chemical_formula_weight          615.76 
  
loop_ 
 _atom_type_symbol 
 _atom_type_description 
 _atom_type_scat_dispersion_real 
 _atom_type_scat_dispersion_imag 
 _atom_type_scat_source 
 'C'  'C'   0.0181   0.0091 
 'International Tables Vol C Tables 4.2.6.8 and 6.1.1.4' 
 'H'  'H'   0.0000   0.0000 
 'International Tables Vol C Tables 4.2.6.8 and 6.1.1.4' 
 'N'  'N'   0.0311   0.0180 
 'International Tables Vol C Tables 4.2.6.8 and 6.1.1.4' 
 'O'  'O'   0.0492   0.0322 
 'International Tables Vol C Tables 4.2.6.8 and 6.1.1.4' 
  
_symmetry_cell_setting            Triclinic 
_symmetry_space_group_name_H-M    'P -1'
_symmetry_space_group_name_Hall   '-P 1'  
  
loop_ 
 _symmetry_equiv_pos_as_xyz 
 'x, y, z' 
 '-x, -y, -z' 
  
_cell_length_a                    10.1792(9) 
_cell_length_b                    11.8174(9) 
_cell_length_c                    13.9668(11) 
_cell_angle_alpha                 90.426(6) 
_cell_angle_beta                  90.494(7) 
_cell_angle_gamma                 102.848(7) 
_cell_volume                      1637.9(2) 
_cell_formula_units_Z             2 
_cell_measurement_temperature     293(2) 
_cell_measurement_reflns_used     3212 
_cell_measurement_theta_min       3.8336 
_cell_measurement_theta_max       73.4293 
  
_exptl_crystal_description        prismatic 
_exptl_crystal_colour             yellow 
_exptl_crystal_size_max           0.50 
_exptl_crystal_size_mid           0.19 
_exptl_crystal_size_min           0.14 
_exptl_crystal_density_meas       ? 
_exptl_crystal_density_diffrn     1.249 
_exptl_crystal_density_method     'not measured' 
_exptl_crystal_F_000              656 
_exptl_absorpt_coefficient_mu     0.637 
_exptl_absorpt_correction_T_min                   0.81026 
_exptl_absorpt_correction_T_max                   1.00000 
_exptl_absorpt_correction_type            'multi-scan' 
_exptl_absorpt_process_details 
; 
CrysAlisPro, Agilent Technologies, 
Version 1.171.35.21 (release 20-01-2012 CrysAlis171 .NET) 
(compiled Jan 23 2012,18:06:46) 
Empirical absorption correction using spherical harmonics, 
 implemented in SCALE3 ABSPACK scaling algorithm. 
; 
  
_exptl_special_details 
; 
 ? 
; 
  
_diffrn_ambient_temperature       293(2) 
_diffrn_radiation_wavelength      1.54178 
_diffrn_radiation_type            'Cu K\a'
_diffrn_radiation_source          'SuperNova (Cu) X-ray Source'
_diffrn_radiation_monochromator   'mirror'
_diffrn_measurement_device_type   'SuperNova, Dual, Cu at zero, Atlas'
_diffrn_detector_area_resol_mean  10.4839
_diffrn_measurement_method        'omega scans'
_diffrn_standards_number          ? 
_diffrn_standards_interval_count  ? 
_diffrn_standards_interval_time   ? 
_diffrn_standards_decay_%         ? 
_diffrn_reflns_number             9834 
_diffrn_reflns_av_R_equivalents   0.0582 
_diffrn_reflns_av_sigmaI/netI     0.0589 
_diffrn_reflns_limit_h_min        -5 
_diffrn_reflns_limit_h_max        12 
_diffrn_reflns_limit_k_min        -14 
_diffrn_reflns_limit_k_max        14 
_diffrn_reflns_limit_l_min        -17 
_diffrn_reflns_limit_l_max        17 
_diffrn_reflns_theta_min          3.84 
_diffrn_reflns_theta_max          73.58 
_reflns_number_total              6284 
_reflns_number_gt                 4570 
_reflns_threshold_expression      >2sigma(I) 
  
_computing_data_collection 
; 
CrysAlisPro, Agilent Technologies, 
Version 1.171.35.21 (release 20-01-2012 CrysAlis171 .NET) 
(compiled Jan 23 2012,18:06:46) 
; 
_computing_cell_refinement 
; 
CrysAlisPro, Agilent Technologies, 
Version 1.171.35.21 (release 20-01-2012 CrysAlis171 .NET) 
(compiled Jan 23 2012,18:06:46) 
; 
_computing_data_reduction 
; 
CrysAlisPro, Agilent Technologies, 
Version 1.171.35.21 (release 20-01-2012 CrysAlis171 .NET) 
(compiled Jan 23 2012,18:06:46) 
; 
_computing_structure_solution   'Bruker SHELXTL' 
_computing_structure_refinement 'Bruker SHELXTL' 
_computing_molecular_graphics   'Bruker SHELXTL' 
_computing_publication_material 'Bruker SHELXTL' 
  
_refine_special_details 
; 
 Refinement of F^2^ against ALL reflections.  The weighted R-factor wR and 
 goodness of fit S are based on F^2^, conventional R-factors R are based 
 on F, with F set to zero for negative F^2^. The threshold expression of 
 F^2^ > 2sigma(F^2^) is used only for calculating R-factors(gt) etc. and is 
 not relevant to the choice of reflections for refinement.  R-factors based 
 on F^2^ are statistically about twice as large as those based on F, and R- 
 factors based on ALL data will be even larger. 
; 
  
_refine_ls_structure_factor_coef  Fsqd 
_refine_ls_matrix_type            full 
_refine_ls_weighting_scheme       calc 
_refine_ls_weighting_details 
 'calc w=1/[\s^2^(Fo^2^)+(0.1400P)^2^+0.0000P] where P=(Fo^2^+2Fc^2^)/3' 
_atom_sites_solution_primary      direct 
_atom_sites_solution_secondary    difmap 
_atom_sites_solution_hydrogens    geom 
_refine_ls_hydrogen_treatment     constr 
_refine_ls_extinction_method      none 
_refine_ls_extinction_coef        ? 
_refine_ls_number_reflns          6284 
_refine_ls_number_parameters      452 
_refine_ls_number_restraints      14 
_refine_ls_R_factor_all           0.0995 
_refine_ls_R_factor_gt            0.0834 
_refine_ls_wR_factor_ref          0.2449 
_refine_ls_wR_factor_gt           0.2152 
_refine_ls_goodness_of_fit_ref    1.044 
_refine_ls_restrained_S_all       1.044 
_refine_ls_shift/su_max           0.000 
_refine_ls_shift/su_mean          0.000 
  
loop_ 
 _atom_site_label 
 _atom_site_type_symbol 
 _atom_site_fract_x 
 _atom_site_fract_y 
 _atom_site_fract_z 
 _atom_site_U_iso_or_equiv 
 _atom_site_adp_type 
 _atom_site_occupancy 
 _atom_site_symmetry_multiplicity 
 _atom_site_calc_flag 
 _atom_site_refinement_flags 
 _atom_site_disorder_assembly 
 _atom_site_disorder_group 
O1 O 0.28018(15) 0.55576(13) 0.48060(11) 0.0489(4) Uani 1 1 d . . . 
O2 O 0.29732(18) 0.67380(15) 0.35891(13) 0.0588(5) Uani 1 1 d . . . 
N1A N 0.1836(12) 0.2995(12) 0.7411(10) 0.044(3) Uani 0.400(12) 1 d PD A 1 
N1B N 0.1967(8) 0.2774(8) 0.7282(7) 0.048(2) Uani 0.600(12) 1 d PD A 2 
N2 N 0.6531(2) 0.88229(17) 0.44211(16) 0.0543(5) Uani 1 1 d . . . 
N3 N 0.8610(2) 1.34481(18) 0.28300(17) 0.0601(5) Uani 1 1 d . . . 
H3 H 0.9299 1.4017 0.2787 0.072 Uiso 1 1 calc R . . 
N4 N 0.6426(2) 0.74217(16) 0.59360(15) 0.0515(5) Uani 1 1 d . . . 
H4 H 0.6732 0.8036 0.5609 0.062 Uiso 1 1 calc R . . 
N5 N 0.7304(2) 1.10410(19) 0.72199(19) 0.0673(6) Uani 1 1 d . . . 
H5 H 0.6986 1.1616 0.7025 0.081 Uiso 1 1 calc R . . 
C1 C 0.3518(2) 0.65089(18) 0.43410(16) 0.0463(5) Uani 1 1 d . . . 
C2 C 0.4767(2) 0.71173(17) 0.47261(16) 0.0447(5) Uani 1 1 d . . . 
C3 C 0.5277(2) 0.67744(17) 0.56019(15) 0.0442(5) Uani 1 1 d . . . 
C4 C 0.4499(2) 0.57327(17) 0.60575(15) 0.0429(5) Uani 1 1 d . . . 
C5 C 0.4850(2) 0.52305(19) 0.69073(17) 0.0509(5) Uani 1 1 d . A . 
H5A H 0.5672 0.5556 0.7202 0.061 Uiso 1 1 calc R . . 
C6 C 0.4027(3) 0.4277(2) 0.73211(17) 0.0513(5) Uani 1 1 d D . . 
C7 C 0.2763(2) 0.37842(19) 0.69057(17) 0.0488(5) Uani 1 1 d D A . 
C8 C 0.2384(2) 0.42322(18) 0.60442(17) 0.0464(5) Uani 1 1 d . . . 
C9 C 0.3262(2) 0.51871(17) 0.56502(15) 0.0429(4) Uani 1 1 d . A . 
C10A C 0.4518(13) 0.3758(12) 0.8244(7) 0.062(5) Uani 0.400(12) 1 d PD A 1 
H10A H 0.4984 0.3152 0.8080 0.074 Uiso 0.400(12) 1 calc PR A 1 
H10B H 0.5131 0.4357 0.8609 0.074 Uiso 0.400(12) 1 calc PR A 1 
C11A C 0.3261(8) 0.3261(9) 0.8826(6) 0.075(3) Uani 0.400(12) 1 d PD A 1 
H11A H 0.3519 0.2870 0.9382 0.090 Uiso 0.400(12) 1 calc PR A 1 
H11B H 0.2879 0.3895 0.9053 0.090 Uiso 0.400(12) 1 calc PR A 1 
C12A C 0.2203(11) 0.2420(16) 0.8262(8) 0.052(3) Uani 0.400(12) 1 d PD A 1 
H12A H 0.2549 0.1750 0.8074 0.062 Uiso 0.400(12) 1 calc PR A 1 
H12B H 0.1414 0.2154 0.8653 0.062 Uiso 0.400(12) 1 calc PR A 1 
C10B C 0.4427(10) 0.3821(8) 0.8237(7) 0.076(5) Uani 0.600(12) 1 d PD A 2 
H10C H 0.4303 0.4344 0.8750 0.091 Uiso 0.600(12) 1 calc PR A 2 
H10D H 0.5379 0.3823 0.8214 0.091 Uiso 0.600(12) 1 calc PR A 2 
C11B C 0.3662(6) 0.2612(5) 0.8479(4) 0.072(2) Uani 0.600(12) 1 d PD A 2 
H11C H 0.3823 0.2437 0.9142 0.086 Uiso 0.600(12) 1 calc PR A 2 
H11D H 0.3940 0.2042 0.8071 0.086 Uiso 0.600(12) 1 calc PR A 2 
C12B C 0.2179(13) 0.2600(18) 0.8312(10) 0.105(6) Uani 0.600(12) 1 d PD A 2 
H12C H 0.1625 0.1864 0.8512 0.125 Uiso 0.600(12) 1 calc PR A 2 
H12D H 0.1927 0.3215 0.8683 0.125 Uiso 0.600(12) 1 calc PR A 2 
C13 C 0.0560(3) 0.2432(3) 0.6971(2) 0.0721(8) Uani 1 1 d D . . 
H13A H -0.0138 0.2781 0.7234 0.086 Uiso 0.400(12) 1 calc PR A 1 
H13B H 0.0356 0.1622 0.7153 0.086 Uiso 0.400(12) 1 calc PR A 1 
H13C H 0.0049 0.2949 0.7254 0.086 Uiso 0.600(12) 1 calc PR A 2 
H13D H 0.0173 0.1648 0.7179 0.086 Uiso 0.600(12) 1 calc PR A 2 
C14 C 0.0493(3) 0.2492(3) 0.5903(2) 0.0677(7) Uani 1 1 d . A . 
H14A H -0.0435 0.2236 0.5689 0.081 Uiso 1 1 calc R . . 
H14B H 0.1008 0.1975 0.5625 0.081 Uiso 1 1 calc R . . 
C15 C 0.1052(2) 0.3723(2) 0.55611(19) 0.0571(6) Uani 1 1 d . A . 
H15A H 0.1170 0.3716 0.4873 0.068 Uiso 1 1 calc R . . 
H15B H 0.0416 0.4201 0.5704 0.068 Uiso 1 1 calc R . . 
C16 C 0.5456(2) 0.80909(19) 0.41664(16) 0.0478(5) Uani 1 1 d . . . 
H16 H 0.5086 0.8195 0.3571 0.057 Uiso 1 1 calc R . . 
C17 C 0.7047(3) 0.9761(2) 0.3757(2) 0.0576(6) Uani 1 1 d . . . 
H17A H 0.6719 0.9524 0.3116 0.069 Uiso 1 1 calc R . . 
H17B H 0.8023 0.9908 0.3751 0.069 Uiso 1 1 calc R . . 
C18 C 0.6620(3) 1.0867(2) 0.40295(19) 0.0580(6) Uani 1 1 d . . . 
H18A H 0.5645 1.0726 0.3996 0.070 Uiso 1 1 calc R . . 
H18B H 0.6892 1.1067 0.4688 0.070 Uiso 1 1 calc R . . 
C19 C 0.7200(2) 1.18765(19) 0.34073(18) 0.0498(5) Uani 1 1 d . . . 
C20 C 0.6673(2) 1.2175(2) 0.25173(17) 0.0493(5) Uani 1 1 d . . . 
C21 C 0.5504(3) 1.1723(3) 0.1989(2) 0.0672(7) Uani 1 1 d . . . 
H21 H 0.4896 1.1066 0.2199 0.081 Uiso 1 1 calc R . . 
C22 C 0.5258(3) 1.2254(4) 0.1158(2) 0.0823(9) Uani 1 1 d . . . 
H22 H 0.4480 1.1953 0.0803 0.099 Uiso 1 1 calc R . . 
C23 C 0.6174(4) 1.3253(4) 0.0838(2) 0.0826(9) Uani 1 1 d . . . 
H23 H 0.5981 1.3611 0.0280 0.099 Uiso 1 1 calc R . . 
C24 C 0.7338(3) 1.3704(3) 0.1332(2) 0.0669(7) Uani 1 1 d . . . 
H24 H 0.7953 1.4347 0.1107 0.080 Uiso 1 1 calc R . . 
C25 C 0.7579(2) 1.3176(2) 0.21798(18) 0.0522(5) Uani 1 1 d . . . 
C26 C 0.8369(3) 1.2671(2) 0.35588(19) 0.0560(6) Uani 1 1 d . . . 
H26 H 0.8931 1.2683 0.4089 0.067 Uiso 1 1 calc R . . 
C27 C 0.7263(2) 0.7277(2) 0.67596(18) 0.0537(5) Uani 1 1 d . . . 
H27A H 0.7588 0.6570 0.6686 0.064 Uiso 1 1 calc R . . 
H27B H 0.6737 0.7219 0.7340 0.064 Uiso 1 1 calc R . . 
C28 C 0.8465(2) 0.8330(2) 0.6831(2) 0.0603(6) Uani 1 1 d . . . 
H28A H 0.9134 0.8146 0.7266 0.072 Uiso 1 1 calc R . . 
H28B H 0.8873 0.8469 0.6206 0.072 Uiso 1 1 calc R . . 
C29 C 0.8096(2) 0.9409(2) 0.71711(19) 0.0549(6) Uani 1 1 d . . . 
C30 C 0.7642(3) 1.0206(2) 0.6647(2) 0.0636(7) Uani 1 1 d . . . 
H30 H 0.7570 1.0189 0.5982 0.076 Uiso 1 1 calc R . . 
C31 C 0.7556(3) 1.0810(2) 0.8149(2) 0.0603(6) Uani 1 1 d . . . 
C32 C 0.7388(4) 1.1395(3) 0.8985(3) 0.0816(9) Uani 1 1 d . . . 
H32 H 0.7058 1.2068 0.8969 0.098 Uiso 1 1 calc R . . 
C33 C 0.7723(5) 1.0957(4) 0.9839(3) 0.0930(11) Uani 1 1 d . . . 
H33 H 0.7614 1.1333 1.0411 0.112 Uiso 1 1 calc R . . 
C34 C 0.8233(5) 0.9939(4) 0.9854(3) 0.0943(11) Uani 1 1 d . . . 
H34 H 0.8467 0.9656 1.0436 0.113 Uiso 1 1 calc R . . 
C35 C 0.8389(4) 0.9361(3) 0.9024(2) 0.0738(8) Uani 1 1 d . . . 
H35 H 0.8719 0.8688 0.9047 0.089 Uiso 1 1 calc R . . 
C36 C 0.8054(2) 0.9781(2) 0.81451(19) 0.0554(6) Uani 1 1 d . . . 
O3 O 0.1188(2) 0.5032(2) 0.25655(19) 0.0892(7) Uani 1 1 d . . . 
H3A H 0.1702 0.5521 0.2891 0.134 Uiso 1 1 calc R . . 
C37 C 0.1431(5) 0.5265(4) 0.1596(3) 0.1043(13) Uani 1 1 d . . . 
H37A H 0.2309 0.5782 0.1531 0.125 Uiso 1 1 calc R . . 
H37B H 0.0762 0.5660 0.1349 0.125 Uiso 1 1 calc R . . 
C38 C 0.1390(8) 0.4224(6) 0.1029(4) 0.141(2) Uani 1 1 d . . . 
H38A H 0.2048 0.3827 0.1271 0.211 Uiso 1 1 calc R . . 
H38B H 0.1584 0.4432 0.0374 0.211 Uiso 1 1 calc R . . 
H38C H 0.0509 0.3723 0.1067 0.211 Uiso 1 1 calc R . . 
  
loop_ 
 _atom_site_aniso_label 
 _atom_site_aniso_U_11 
 _atom_site_aniso_U_22 
 _atom_site_aniso_U_33 
 _atom_site_aniso_U_23 
 _atom_site_aniso_U_13 
 _atom_site_aniso_U_12 
O1 0.0500(8) 0.0426(8) 0.0480(8) 0.0121(6) -0.0077(6) -0.0025(6) 
O2 0.0648(10) 0.0471(8) 0.0577(10) 0.0173(7) -0.0150(7) -0.0019(7) 
N1A 0.055(4) 0.039(5) 0.039(4) 0.004(3) 0.007(3) 0.009(3) 
N1B 0.058(3) 0.033(3) 0.049(3) 0.007(3) 0.004(2) 0.003(2) 
N2 0.0590(11) 0.0393(9) 0.0596(12) 0.0104(8) 0.0011(8) -0.0002(8) 
N3 0.0607(12) 0.0454(10) 0.0651(13) 0.0059(9) -0.0002(9) -0.0077(8) 
N4 0.0557(10) 0.0392(9) 0.0528(11) 0.0089(8) -0.0068(8) -0.0043(7) 
N5 0.0722(13) 0.0442(10) 0.0811(16) 0.0143(10) -0.0169(11) 0.0038(9) 
C1 0.0549(11) 0.0350(9) 0.0459(11) 0.0061(8) -0.0019(9) 0.0029(8) 
C2 0.0509(11) 0.0337(9) 0.0473(11) 0.0041(8) 0.0008(8) 0.0043(8) 
C3 0.0529(11) 0.0345(9) 0.0439(11) 0.0005(8) -0.0008(8) 0.0067(8) 
C4 0.0497(11) 0.0324(9) 0.0446(11) 0.0025(8) -0.0007(8) 0.0049(8) 
C5 0.0588(12) 0.0405(10) 0.0482(12) 0.0040(9) -0.0088(9) 0.0000(9) 
C6 0.0625(13) 0.0414(10) 0.0464(12) 0.0053(9) -0.0034(9) 0.0036(9) 
C7 0.0538(12) 0.0409(10) 0.0486(12) 0.0072(9) 0.0010(9) 0.0039(9) 
C8 0.0486(11) 0.0385(10) 0.0484(11) 0.0062(8) 0.0009(9) 0.0014(8) 
C9 0.0495(10) 0.0357(9) 0.0424(10) 0.0047(8) 0.0001(8) 0.0067(8) 
C10A 0.098(10) 0.064(8) 0.029(5) 0.009(4) -0.006(5) 0.031(7) 
C11A 0.091(5) 0.080(6) 0.050(4) 0.022(4) 0.001(3) 0.011(4) 
C12A 0.055(6) 0.056(5) 0.034(5) 0.022(3) -0.001(4) -0.012(4) 
C10B 0.071(5) 0.053(5) 0.086(8) 0.026(4) -0.030(4) -0.024(4) 
C11B 0.093(4) 0.058(3) 0.058(3) 0.020(2) -0.018(2) 0.003(3) 
C12B 0.118(10) 0.087(8) 0.088(9) 0.033(6) -0.011(7) -0.022(6) 
C13 0.0643(15) 0.0687(16) 0.0719(18) 0.0250(14) 0.0010(12) -0.0102(12) 
C14 0.0594(14) 0.0617(15) 0.0693(17) 0.0165(12) -0.0097(11) -0.0138(11) 
C15 0.0505(12) 0.0559(13) 0.0586(14) 0.0143(11) -0.0047(10) -0.0017(10) 
C16 0.0555(12) 0.0400(10) 0.0461(11) 0.0057(8) 0.0037(9) 0.0064(9) 
C17 0.0633(13) 0.0395(11) 0.0660(15) 0.0102(10) 0.0112(11) 0.0020(9) 
C18 0.0691(14) 0.0497(12) 0.0538(13) 0.0129(10) 0.0084(11) 0.0095(11) 
C19 0.0548(12) 0.0402(10) 0.0531(12) 0.0081(9) 0.0025(9) 0.0073(9) 
C20 0.0493(11) 0.0459(11) 0.0493(12) 0.0033(9) 0.0031(9) 0.0034(9) 
C21 0.0544(13) 0.0727(17) 0.0654(16) 0.0038(13) -0.0032(11) -0.0051(12) 
C22 0.0687(17) 0.108(3) 0.0666(18) 0.0020(17) -0.0178(14) 0.0134(17) 
C23 0.099(2) 0.096(2) 0.0558(16) 0.0188(16) -0.0038(15) 0.0291(19) 
C24 0.0797(17) 0.0606(14) 0.0600(15) 0.0161(12) 0.0094(13) 0.0138(13) 
C25 0.0562(12) 0.0434(11) 0.0541(13) 0.0064(9) 0.0049(9) 0.0044(9) 
C26 0.0581(12) 0.0508(12) 0.0555(13) 0.0048(10) -0.0083(10) 0.0045(10) 
C27 0.0557(12) 0.0434(11) 0.0584(13) 0.0026(9) -0.0099(10) 0.0034(9) 
C28 0.0491(12) 0.0572(13) 0.0691(16) 0.0021(11) -0.0063(10) 0.0005(10) 
C29 0.0484(11) 0.0450(11) 0.0629(14) 0.0079(10) -0.0091(9) -0.0076(9) 
C30 0.0704(15) 0.0519(13) 0.0586(14) 0.0106(11) -0.0153(11) -0.0071(11) 
C31 0.0595(13) 0.0461(11) 0.0688(16) 0.0102(11) -0.0065(11) -0.0023(10) 
C32 0.094(2) 0.0594(16) 0.090(2) -0.0020(15) 0.0020(17) 0.0137(15) 
C33 0.131(3) 0.076(2) 0.070(2) -0.0033(16) 0.006(2) 0.018(2) 
C34 0.133(3) 0.084(2) 0.0601(18) 0.0150(16) -0.0120(19) 0.011(2) 
C35 0.091(2) 0.0568(14) 0.0701(18) 0.0133(13) -0.0149(14) 0.0095(14) 
C36 0.0519(12) 0.0441(11) 0.0632(14) 0.0097(10) -0.0086(10) -0.0045(9) 
O3 0.0864(14) 0.0745(14) 0.0868(16) 0.0052(12) -0.0095(11) -0.0244(11) 
C37 0.107(3) 0.087(3) 0.102(3) 0.027(2) -0.005(2) -0.016(2) 
C38 0.199(7) 0.129(5) 0.092(3) 0.003(3) 0.027(4) 0.031(4) 
  
_geom_special_details 
; 
 All esds (except the esd in the dihedral angle between two l.s. planes) 
 are estimated using the full covariance matrix.  The cell esds are taken 
 into account individually in the estimation of esds in distances, angles 
 and torsion angles; correlations between esds in cell parameters are only 
 used when they are defined by crystal symmetry.  An approximate (isotropic) 
 treatment of cell esds is used for estimating esds involving l.s. planes. 
; 
  
loop_ 
 _geom_bond_atom_site_label_1 
 _geom_bond_atom_site_label_2 
 _geom_bond_distance 
 _geom_bond_site_symmetry_2 
 _geom_bond_publ_flag 
O1 C1 1.368(3) . ? 
O1 C9 1.375(3) . ? 
O2 C1 1.243(3) . ? 
N1A C7 1.374(11) . ? 
N1A C13 1.449(11) . ? 
N1A C12A 1.460(11) . ? 
N1B C7 1.394(8) . ? 
N1B C13 1.460(8) . ? 
N1B C12B 1.476(11) . ? 
N2 C16 1.281(3) . ? 
N2 C17 1.459(3) . ? 
N3 C25 1.363(3) . ? 
N3 C26 1.363(3) . ? 
N3 H3 0.8600 . ? 
N4 C3 1.326(3) . ? 
N4 C27 1.459(3) . ? 
N4 H4 0.8600 . ? 
N5 C31 1.361(4) . ? 
N5 C30 1.370(4) . ? 
N5 H5 0.8600 . ? 
C1 C2 1.414(3) . ? 
C2 C3 1.421(3) . ? 
C2 C16 1.446(3) . ? 
C3 C4 1.461(3) . ? 
C4 C9 1.395(3) . ? 
C4 C5 1.409(3) . ? 
C5 C6 1.380(3) . ? 
C5 H5A 0.9300 . ? 
C6 C7 1.407(3) . ? 
C6 C10B 1.481(8) . ? 
C6 C10A 1.558(10) . ? 
C7 C8 1.403(3) . ? 
C8 C9 1.394(3) . ? 
C8 C15 1.507(3) . ? 
C10A C11A 1.528(12) . ? 
C10A H10A 0.9700 . ? 
C10A H10B 0.9700 . ? 
C11A C12A 1.506(13) . ? 
C11A H11A 0.9700 . ? 
C11A H11B 0.9700 . ? 
C12A H12A 0.9700 . ? 
C12A H12B 0.9700 . ? 
C10B C11B 1.509(7) . ? 
C10B H10C 0.9700 . ? 
C10B H10D 0.9700 . ? 
C11B C12B 1.522(13) . ? 
C11B H11C 0.9700 . ? 
C11B H11D 0.9700 . ? 
C12B H12C 0.9700 . ? 
C12B H12D 0.9700 . ? 
C13 C14 1.497(4) . ? 
C13 H13A 0.9700 . ? 
C13 H13B 0.9700 . ? 
C13 H13C 0.9700 . ? 
C13 H13D 0.9700 . ? 
C14 C15 1.521(3) . ? 
C14 H14A 0.9700 . ? 
C14 H14B 0.9700 . ? 
C15 H15A 0.9700 . ? 
C15 H15B 0.9700 . ? 
C16 H16 0.9300 . ? 
C17 C18 1.514(4) . ? 
C17 H17A 0.9700 . ? 
C17 H17B 0.9700 . ? 
C18 C19 1.496(3) . ? 
C18 H18A 0.9700 . ? 
C18 H18B 0.9700 . ? 
C19 C26 1.356(3) . ? 
C19 C20 1.427(3) . ? 
C20 C21 1.394(4) . ? 
C20 C25 1.415(3) . ? 
C21 C22 1.371(5) . ? 
C21 H21 0.9300 . ? 
C22 C23 1.410(6) . ? 
C22 H22 0.9300 . ? 
C23 C24 1.366(5) . ? 
C23 H23 0.9300 . ? 
C24 C25 1.387(4) . ? 
C24 H24 0.9300 . ? 
C26 H26 0.9300 . ? 
C27 C28 1.541(3) . ? 
C27 H27A 0.9700 . ? 
C27 H27B 0.9700 . ? 
C28 C29 1.483(4) . ? 
C28 H28A 0.9700 . ? 
C28 H28B 0.9700 . ? 
C29 C30 1.354(4) . ? 
C29 C36 1.430(4) . ? 
C30 H30 0.9300 . ? 
C31 C32 1.384(5) . ? 
C31 C36 1.418(4) . ? 
C32 C33 1.374(6) . ? 
C32 H32 0.9300 . ? 
C33 C34 1.413(6) . ? 
C33 H33 0.9300 . ? 
C34 C35 1.369(5) . ? 
C34 H34 0.9300 . ? 
C35 C36 1.396(4) . ? 
C35 H35 0.9300 . ? 
O3 C37 1.397(5) . ? 
O3 H3A 0.8200 . ? 
C37 C38 1.451(8) . ? 
C37 H37A 0.9700 . ? 
C37 H37B 0.9700 . ? 
C38 H38A 0.9600 . ? 
C38 H38B 0.9600 . ? 
C38 H38C 0.9600 . ? 
  
loop_ 
 _geom_angle_atom_site_label_1 
 _geom_angle_atom_site_label_2 
 _geom_angle_atom_site_label_3 
 _geom_angle 
 _geom_angle_site_symmetry_1 
 _geom_angle_site_symmetry_3 
 _geom_angle_publ_flag 
C1 O1 C9 121.37(17) . . ? 
C7 N1A C13 120.3(9) . . ? 
C7 N1A C12A 122.3(9) . . ? 
C13 N1A C12A 114.7(8) . . ? 
C7 N1B C13 118.2(7) . . ? 
C7 N1B C12B 115.0(9) . . ? 
C13 N1B C12B 113.9(7) . . ? 
C16 N2 C17 116.8(2) . . ? 
C25 N3 C26 108.8(2) . . ? 
C25 N3 H3 125.6 . . ? 
C26 N3 H3 125.6 . . ? 
C3 N4 C27 131.46(19) . . ? 
C3 N4 H4 114.3 . . ? 
C27 N4 H4 114.3 . . ? 
C31 N5 C30 108.7(2) . . ? 
C31 N5 H5 125.7 . . ? 
C30 N5 H5 125.7 . . ? 
O2 C1 O1 113.96(19) . . ? 
O2 C1 C2 126.5(2) . . ? 
O1 C1 C2 119.56(19) . . ? 
C1 C2 C3 121.07(19) . . ? 
C1 C2 C16 115.0(2) . . ? 
C3 C2 C16 123.9(2) . . ? 
N4 C3 C2 117.31(19) . . ? 
N4 C3 C4 125.3(2) . . ? 
C2 C3 C4 117.42(19) . . ? 
C9 C4 C5 115.28(19) . . ? 
C9 C4 C3 118.46(19) . . ? 
C5 C4 C3 126.2(2) . . ? 
C6 C5 C4 122.8(2) . . ? 
C6 C5 H5A 118.6 . . ? 
C4 C5 H5A 118.6 . . ? 
C5 C6 C7 119.9(2) . . ? 
C5 C6 C10B 120.2(3) . . ? 
C7 C6 C10B 119.8(3) . . ? 
C5 C6 C10A 119.2(5) . . ? 
C7 C6 C10A 120.9(5) . . ?
N1A C7 C8 120.1(5) . . ? 
N1B C7 C8 120.0(4) . . ? 
N1A C7 C6 119.8(5) . . ? 
N1B C7 C6 120.1(4) . . ? 
C8 C7 C6 119.4(2) . . ? 
C9 C8 C7 118.3(2) . . ? 
C9 C8 C15 120.2(2) . . ? 
C7 C8 C15 121.50(19) . . ? 
O1 C9 C8 113.78(19) . . ? 
O1 C9 C4 121.95(18) . . ? 
C8 C9 C4 124.3(2) . . ? 
C11A C10A C6 106.6(8) . . ? 
C11A C10A H10A 110.4 . . ? 
C6 C10A H10A 110.4 . . ? 
C11A C10A H10B 110.4 . . ? 
C6 C10A H10B 110.4 . . ? 
H10A C10A H10B 108.6 . . ? 
C12A C11A C10A 113.0(9) . . ? 
C12A C11A H11A 109.0 . . ? 
C10A C11A H11A 109.0 . . ? 
C12A C11A H11B 109.0 . . ? 
C10A C11A H11B 109.0 . . ? 
H11A C11A H11B 107.8 . . ? 
N1A C12A C11A 109.3(12) . . ? 
N1A C12A H12A 109.8 . . ? 
C11A C12A H12A 109.8 . . ? 
N1A C12A H12B 109.8 . . ? 
C11A C12A H12B 109.8 . . ? 
H12A C12A H12B 108.3 . . ? 
C6 C10B C11B 115.0(5) . . ? 
C6 C10B H10C 108.5 . . ? 
C11B C10B H10C 108.5 . . ? 
C6 C10B H10D 108.5 . . ? 
C11B C10B H10D 108.5 . . ? 
H10C C10B H10D 107.5 . . ? 
C10B C11B C12B 106.1(10) . . ? 
C10B C11B H11C 110.5 . . ? 
C12B C11B H11C 110.5 . . ? 
C10B C11B H11D 110.5 . . ? 
C12B C11B H11D 110.5 . . ? 
H11C C11B H11D 108.7 . . ? 
N1B C12B C11B 108.3(10) . . ? 
N1B C12B H12C 110.0 . . ? 
C11B C12B H12C 110.0 . . ? 
N1B C12B H12D 110.0 . . ? 
C11B C12B H12D 110.0 . . ? 
H12C C12B H12D 108.4 . . ? 
N1A C13 C14 115.8(6) . . ? 
N1B C13 C14 108.9(4) . . ? 
N1A C13 H13A 108.3 . . ? 
N1B C13 H13A 122.7 . . ? 
C14 C13 H13A 108.3 . . ? 
N1A C13 H13B 108.3 . . ? 
N1B C13 H13B 100.2 . . ? 
C14 C13 H13B 108.3 . . ? 
H13A C13 H13B 107.4 . . ? 
N1A C13 H13C 95.4 . . ? 
N1B C13 H13C 109.9 . . ? 
C14 C13 H13C 109.9 . . ? 
H13B C13 H13C 118.9 . . ? 
N1A C13 H13D 116.3 . . ? 
N1B C13 H13D 109.9 . . ? 
C14 C13 H13D 109.9 . . ? 
H13A C13 H13D 96.1 . . ? 
H13C C13 H13D 108.3 . . ? 
C13 C14 C15 110.9(2) . . ? 
C13 C14 H14A 109.5 . . ? 
C15 C14 H14A 109.5 . . ? 
C13 C14 H14B 109.5 . . ? 
C15 C14 H14B 109.5 . . ? 
H14A C14 H14B 108.0 . . ? 
C8 C15 C14 110.6(2) . . ? 
C8 C15 H15A 109.5 . . ? 
C14 C15 H15A 109.5 . . ? 
C8 C15 H15B 109.5 . . ? 
C14 C15 H15B 109.5 . . ? 
H15A C15 H15B 108.1 . . ? 
N2 C16 C2 125.5(2) . . ? 
N2 C16 H16 117.2 . . ? 
C2 C16 H16 117.2 . . ? 
N2 C17 C18 111.9(2) . . ? 
N2 C17 H17A 109.2 . . ? 
C18 C17 H17A 109.2 . . ? 
N2 C17 H17B 109.2 . . ? 
C18 C17 H17B 109.2 . . ? 
H17A C17 H17B 107.9 . . ? 
C19 C18 C17 113.9(2) . . ? 
C19 C18 H18A 108.8 . . ? 
C17 C18 H18A 108.8 . . ? 
C19 C18 H18B 108.8 . . ? 
C17 C18 H18B 108.8 . . ? 
H18A C18 H18B 107.7 . . ? 
C26 C19 C20 105.9(2) . . ? 
C26 C19 C18 126.7(2) . . ? 
C20 C19 C18 127.4(2) . . ? 
C21 C20 C25 118.9(2) . . ? 
C21 C20 C19 133.8(2) . . ? 
C25 C20 C19 107.2(2) . . ? 
C22 C21 C20 119.5(3) . . ? 
C22 C21 H21 120.3 . . ? 
C20 C21 H21 120.3 . . ? 
C21 C22 C23 120.5(3) . . ? 
C21 C22 H22 119.7 . . ? 
C23 C22 H22 119.7 . . ? 
C24 C23 C22 121.2(3) . . ? 
C24 C23 H23 119.4 . . ? 
C22 C23 H23 119.4 . . ? 
C23 C24 C25 118.2(3) . . ? 
C23 C24 H24 120.9 . . ? 
C25 C24 H24 120.9 . . ? 
N3 C25 C24 131.3(2) . . ? 
N3 C25 C20 107.1(2) . . ? 
C24 C25 C20 121.6(2) . . ? 
C19 C26 N3 110.9(2) . . ? 
C19 C26 H26 124.5 . . ? 
N3 C26 H26 124.5 . . ? 
N4 C27 C28 109.0(2) . . ? 
N4 C27 H27A 109.9 . . ? 
C28 C27 H27A 109.9 . . ? 
N4 C27 H27B 109.9 . . ? 
C28 C27 H27B 109.9 . . ? 
H27A C27 H27B 108.3 . . ? 
C29 C28 C27 113.8(2) . . ? 
C29 C28 H28A 108.8 . . ? 
C27 C28 H28A 108.8 . . ? 
C29 C28 H28B 108.8 . . ? 
C27 C28 H28B 108.8 . . ? 
H28A C28 H28B 107.7 . . ? 
C30 C29 C36 105.3(2) . . ? 
C30 C29 C28 128.1(3) . . ? 
C36 C29 C28 126.4(2) . . ? 
C29 C30 N5 111.4(2) . . ? 
C29 C30 H30 124.3 . . ? 
N5 C30 H30 124.3 . . ? 
N5 C31 C32 130.6(3) . . ? 
N5 C31 C36 106.9(3) . . ? 
C32 C31 C36 122.4(3) . . ? 
C33 C32 C31 118.3(3) . . ? 
C33 C32 H32 120.8 . . ? 
C31 C32 H32 120.8 . . ? 
C32 C33 C34 120.4(4) . . ? 
C32 C33 H33 119.8 . . ? 
C34 C33 H33 119.8 . . ? 
C35 C34 C33 121.0(3) . . ? 
C35 C34 H34 119.5 . . ? 
C33 C34 H34 119.5 . . ? 
C34 C35 C36 120.1(3) . . ? 
C34 C35 H35 120.0 . . ? 
C36 C35 H35 120.0 . . ? 
C35 C36 C31 117.8(3) . . ? 
C35 C36 C29 134.5(3) . . ? 
C31 C36 C29 107.7(2) . . ? 
C37 O3 H3A 109.5 . . ? 
O3 C37 C38 112.8(4) . . ? 
O3 C37 H37A 109.0 . . ? 
C38 C37 H37A 109.0 . . ? 
O3 C37 H37B 109.0 . . ? 
C38 C37 H37B 109.0 . . ? 
H37A C37 H37B 107.8 . . ? 
C37 C38 H38A 109.5 . . ? 
C37 C38 H38B 109.5 . . ? 
H38A C38 H38B 109.5 . . ? 
C37 C38 H38C 109.5 . . ? 
H38A C38 H38C 109.5 . . ? 
H38B C38 H38C 109.5 . . ? 
  
loop_ 
 _geom_torsion_atom_site_label_1 
 _geom_torsion_atom_site_label_2 
 _geom_torsion_atom_site_label_3 
 _geom_torsion_atom_site_label_4 
 _geom_torsion 
 _geom_torsion_site_symmetry_1 
 _geom_torsion_site_symmetry_2 
 _geom_torsion_site_symmetry_3 
 _geom_torsion_site_symmetry_4 
 _geom_torsion_publ_flag 
C9 O1 C1 O2 -179.9(2) . . . . ? 
C9 O1 C1 C2 0.9(3) . . . . ? 
O2 C1 C2 C3 179.3(2) . . . . ? 
O1 C1 C2 C3 -1.6(3) . . . . ? 
O2 C1 C2 C16 -0.6(4) . . . . ? 
O1 C1 C2 C16 178.55(19) . . . . ? 
C27 N4 C3 C2 -175.1(2) . . . . ? 
C27 N4 C3 C4 4.4(4) . . . . ? 
C1 C2 C3 N4 -177.0(2) . . . . ? 
C16 C2 C3 N4 2.8(3) . . . . ? 
C1 C2 C3 C4 3.5(3) . . . . ? 
C16 C2 C3 C4 -176.70(19) . . . . ? 
N4 C3 C4 C9 175.9(2) . . . . ? 
C2 C3 C4 C9 -4.7(3) . . . . ? 
N4 C3 C4 C5 -1.5(4) . . . . ? 
C2 C3 C4 C5 177.9(2) . . . . ? 
C9 C4 C5 C6 -0.9(4) . . . . ? 
C3 C4 C5 C6 176.5(2) . . . . ? 
C4 C5 C6 C7 -1.6(4) . . . . ? 
C4 C5 C6 C10B -177.3(6) . . . . ? 
C4 C5 C6 C10A 178.1(6) . . . . ? 
C13 N1A C7 N1B -81(3) . . . . ? 
C12A N1A C7 N1B 80(3) . . . . ? 
C13 N1A C7 C8 13.3(16) . . . . ? 
C12A N1A C7 C8 174.1(12) . . . . ? 
C13 N1A C7 C6 -176.5(8) . . . . ? 
C12A N1A C7 C6 -15.6(18) . . . . ? 
C13 N1B C7 N1A 74(3) . . . . ? 
C12B N1B C7 N1A -66(3) . . . . ? 
C13 N1B C7 C8 -21.0(10) . . . . ? 
C12B N1B C7 C8 -160.2(9) . . . . ? 
C13 N1B C7 C6 166.9(5) . . . . ? 
C12B N1B C7 C6 27.7(12) . . . . ? 
C5 C6 C7 N1A -166.9(8) . . . . ? 
C10B C6 C7 N1A 8.8(11) . . . . ? 
C10A C6 C7 N1A 13.3(10) . . . . ? 
C5 C6 C7 N1B 175.5(6) . . . . ? 
C10B C6 C7 N1B -8.7(9) . . . . ? 
C10A C6 C7 N1B -4.2(9) . . . . ? 
C5 C6 C7 C8 3.4(4) . . . . ? 
C10B C6 C7 C8 179.1(6) . . . . ? 
C10A C6 C7 C8 -176.4(6) . . . . ? 
N1A C7 C8 C9 167.7(8) . . . . ? 
N1B C7 C8 C9 -174.7(6) . . . . ? 
C6 C7 C8 C9 -2.5(3) . . . . ? 
N1A C7 C8 C15 -10.8(9) . . . . ? 
N1B C7 C8 C15 6.8(6) . . . . ? 
C6 C7 C8 C15 179.0(2) . . . . ? 
C1 O1 C9 C8 177.75(19) . . . . ? 
C1 O1 C9 C4 -2.3(3) . . . . ? 
C7 C8 C9 O1 179.81(19) . . . . ? 
C15 C8 C9 O1 -1.7(3) . . . . ? 
C7 C8 C9 C4 -0.1(3) . . . . ? 
C15 C8 C9 C4 178.4(2) . . . . ? 
C5 C4 C9 O1 -178.1(2) . . . . ? 
C3 C4 C9 O1 4.2(3) . . . . ? 
C5 C4 C9 C8 1.8(3) . . . . ? 
C3 C4 C9 C8 -175.9(2) . . . . ? 
C5 C6 C10A C11A 148.4(7) . . . . ? 
C7 C6 C10A C11A -31.9(11) . . . . ? 
C10B C6 C10A C11A 43(10) . . . . ? 
C6 C10A C11A C12A 53.8(14) . . . . ? 
C7 N1A C12A C11A 37(2) . . . . ? 
C13 N1A C12A C11A -161.3(10) . . . . ? 
C10A C11A C12A N1A -57.2(17) . . . . ? 
C5 C6 C10B C11B -164.1(7) . . . . ? 
C7 C6 C10B C11B 20.2(12) . . . . ? 
C10A C6 C10B C11B -87(10) . . . . ? 
C6 C10B C11B C12B -47.3(13) . . . . ? 
C7 N1B C12B C11B -56.9(17) . . . . ? 
C13 N1B C12B C11B 162.2(9) . . . . ? 
C10B C11B C12B N1B 64.9(16) . . . . ? 
C7 N1A C13 N1B 82(3) . . . . ? 
C12A N1A C13 N1B -81(3) . . . . ? 
C7 N1A C13 C14 17.0(15) . . . . ? 
C12A N1A C13 C14 -145.3(11) . . . . ? 
C7 N1B C13 N1A -73(3) . . . . ? 
C12B N1B C13 N1A 67(3) . . . . ? 
C7 N1B C13 C14 48.1(9) . . . . ? 
C12B N1B C13 C14 -172.3(11) . . . . ? 
N1A C13 C14 C15 -47.7(8) . . . . ? 
N1B C13 C14 C15 -61.5(5) . . . . ? 
C9 C8 C15 C14 160.9(2) . . . . ? 
C7 C8 C15 C14 -20.6(3) . . . . ? 
C13 C14 C15 C8 47.7(3) . . . . ? 
C17 N2 C16 C2 -178.6(2) . . . . ? 
C1 C2 C16 N2 173.2(2) . . . . ? 
C3 C2 C16 N2 -6.7(4) . . . . ? 
C16 N2 C17 C18 97.9(3) . . . . ? 
N2 C17 C18 C19 176.2(2) . . . . ? 
C17 C18 C19 C26 -91.2(3) . . . . ? 
C17 C18 C19 C20 85.9(3) . . . . ? 
C26 C19 C20 C21 -178.0(3) . . . . ? 
C18 C19 C20 C21 4.4(5) . . . . ? 
C26 C19 C20 C25 -0.8(3) . . . . ? 
C18 C19 C20 C25 -178.4(2) . . . . ? 
C25 C20 C21 C22 0.0(4) . . . . ? 
C19 C20 C21 C22 177.0(3) . . . . ? 
C20 C21 C22 C23 -0.2(5) . . . . ? 
C21 C22 C23 C24 1.3(6) . . . . ? 
C22 C23 C24 C25 -2.2(5) . . . . ? 
C26 N3 C25 C24 178.7(3) . . . . ? 
C26 N3 C25 C20 -0.9(3) . . . . ? 
C23 C24 C25 N3 -177.6(3) . . . . ? 
C23 C24 C25 C20 2.0(4) . . . . ? 
C21 C20 C25 N3 178.7(2) . . . . ? 
C19 C20 C25 N3 1.0(3) . . . . ? 
C21 C20 C25 C24 -0.9(4) . . . . ? 
C19 C20 C25 C24 -178.6(2) . . . . ? 
C20 C19 C26 N3 0.3(3) . . . . ? 
C18 C19 C26 N3 177.9(2) . . . . ? 
C25 N3 C26 C19 0.4(3) . . . . ? 
C3 N4 C27 C28 -177.6(2) . . . . ? 
N4 C27 C28 C29 73.1(3) . . . . ? 
C27 C28 C29 C30 -86.2(3) . . . . ? 
C27 C28 C29 C36 88.9(3) . . . . ? 
C36 C29 C30 N5 -0.7(3) . . . . ? 
C28 C29 C30 N5 175.1(2) . . . . ? 
C31 N5 C30 C29 0.9(3) . . . . ? 
C30 N5 C31 C32 179.7(3) . . . . ? 
C30 N5 C31 C36 -0.7(3) . . . . ? 
N5 C31 C32 C33 179.7(3) . . . . ? 
C36 C31 C32 C33 0.1(5) . . . . ? 
C31 C32 C33 C34 0.4(6) . . . . ? 
C32 C33 C34 C35 -0.8(7) . . . . ? 
C33 C34 C35 C36 0.6(6) . . . . ? 
C34 C35 C36 C31 0.0(4) . . . . ? 
C34 C35 C36 C29 179.7(3) . . . . ? 
N5 C31 C36 C35 -180.0(2) . . . . ? 
C32 C31 C36 C35 -0.3(4) . . . . ? 
N5 C31 C36 C29 0.3(3) . . . . ? 
C32 C31 C36 C29 179.9(3) . . . . ? 
C30 C29 C36 C35 -179.4(3) . . . . ? 
C28 C29 C36 C35 4.6(4) . . . . ? 
C30 C29 C36 C31 0.3(3) . . . . ? 
C28 C29 C36 C31 -175.7(2) . . . . ? 
  
loop_ 
 _geom_hbond_atom_site_label_D 
 _geom_hbond_atom_site_label_H 
 _geom_hbond_atom_site_label_A 
 _geom_hbond_distance_DH 
 _geom_hbond_distance_HA 
 _geom_hbond_distance_DA 
 _geom_hbond_angle_DHA 
 _geom_hbond_site_symmetry_A 
N3 H3 O3  0.86 2.05 2.893(3) 165 1_665 
N4 H4 N2  0.86 1.94 2.685(3) 144 . 
N5 H5 O2  0.86 2.12 2.935(3) 157 2_676 
O3 H3A O2  0.82 1.96 2.774(3) 176 . 
  
_diffrn_measured_fraction_theta_max    0.948 
_diffrn_reflns_theta_full              67.00 
_diffrn_measured_fraction_theta_full   0.985 
_refine_diff_density_max    0.423 
_refine_diff_density_min   -0.310 
_refine_diff_density_rms    0.079

_iucr_refine_instructions_details
;
TITL BO-try-1 in P-1
CELL 1.54178  10.179241  11.817446  13.966812    90.4262    90.4942   102.8483
ZERR    2.00   0.000850   0.000894   0.001108     0.0063     0.0066     0.0068
LATT  1
SFAC C H N O
UNIT  76 82 10 6
REM   -------------------------------------------------------------------------
REM   Data measured on the SUPERNOVA
REM   Crystal colour: yellow; Crystal habit: prismatic
REM   Mole 1 is the organic compound
REM   Mole 2 is the solvent (EtOH)
REM   -------------------------------------------------------------------------
ACTA  134
L.S.  10
BOND  $H
CONF
WPDB -2
SIZE  0.5048 0.1862 0.1391
FMAP  2
PLAN  10
EQIV  $1 1+X, 1+Y, Z
EQIV  $2 1-X, 2-Y, 1-Z
HTAB  N3 O3_$1
HTAB  N4 N2
HTAB  N5 O2_$2
HTAB  O3 O2
SADI  C10A C11A C11A C12A C10B C11B C11B C12B
SADI  C6 C10A C6 C10B
SADI  C12A N1A C12B N1B N1A C13 N1B C13
SADI  C7 N1A C7 N1B
WGHT    0.140000
FVAR       4.52397   0.40002
MOLE  1
O1    4    0.280179    0.555757    0.480598    11.00000    0.04998    0.04259 =
         0.04804    0.01206   -0.00768   -0.00254
O2    4    0.297319    0.673805    0.358907    11.00000    0.06481    0.04710 =
         0.05774    0.01726   -0.01504   -0.00185
PART  1
N1A   3    0.183554    0.299495    0.741076    21.00000    0.05484    0.03886 =
         0.03854    0.00435    0.00745    0.00871
PART  2
N1B   3    0.196744    0.277362    0.728171   -21.00000    0.05815    0.03291 =
         0.04944    0.00733    0.00402    0.00268
PART  0
N2    3    0.653100    0.882294    0.442107    11.00000    0.05899    0.03934 =
         0.05960    0.01037    0.00113   -0.00016
N3    3    0.860952    1.344811    0.283003    11.00000    0.06069    0.04536 =
         0.06515    0.00594   -0.00021   -0.00771
AFIX  43
H3    2    0.929880    1.401723    0.278746    11.00000   -1.20000
AFIX   0
N4    3    0.642596    0.742167    0.593599    11.00000    0.05567    0.03916 =
         0.05278    0.00891   -0.00683   -0.00431
AFIX  43
H4    2    0.673237    0.803608    0.560909    11.00000   -1.20000
AFIX   0
N5    3    0.730439    1.104101    0.721989    11.00000    0.07222    0.04421 =
         0.08109    0.01426   -0.01685    0.00380
AFIX  43
H5    2    0.698623    1.161603    0.702533    11.00000   -1.20000
AFIX   0
C1    1    0.351794    0.650886    0.434099    11.00000    0.05486    0.03496 =
         0.04593    0.00610   -0.00191    0.00293
C2    1    0.476745    0.711729    0.472613    11.00000    0.05088    0.03366 =
         0.04726    0.00406    0.00079    0.00427
C3    1    0.527692    0.677436    0.560193    11.00000    0.05292    0.03447 =
         0.04387    0.00050   -0.00077    0.00672
C4    1    0.449928    0.573270    0.605748    11.00000    0.04972    0.03237 =
         0.04464    0.00247   -0.00072    0.00492
C5    1    0.485037    0.523052    0.690727    11.00000    0.05881    0.04046 =
         0.04819    0.00399   -0.00880    0.00003
AFIX  43
H5A   2    0.567194    0.555555    0.720172    11.00000   -1.20000
AFIX   0
C6    1    0.402670    0.427679    0.732111    11.00000    0.06251    0.04136 =
         0.04636    0.00533   -0.00336    0.00356
C7    1    0.276302    0.378416    0.690569    11.00000    0.05376    0.04091 =
         0.04860    0.00724    0.00104    0.00389
C8    1    0.238434    0.423216    0.604417    11.00000    0.04864    0.03845 =
         0.04838    0.00617    0.00092    0.00145
C9    1    0.326223    0.518710    0.565017    11.00000    0.04954    0.03566 =
         0.04238    0.00472    0.00005    0.00670
PART  1
C10A  1    0.451843    0.375789    0.824426    21.00000    0.09778    0.06437 =
         0.02884    0.00861   -0.00584    0.03133
AFIX  23
H10A  2    0.498396    0.315157    0.808020    21.00000   -1.20000
H10B  2    0.513051    0.435651    0.860873    21.00000   -1.20000
AFIX   0
C11A  1    0.326123    0.326143    0.882614    21.00000    0.09095    0.08040 =
         0.04983    0.02190    0.00102    0.01068
AFIX  23
H11A  2    0.351893    0.287008    0.938186    21.00000   -1.20000
H11B  2    0.287887    0.389502    0.905323    21.00000   -1.20000
AFIX   0
C12A  1    0.220290    0.241971    0.826169    21.00000    0.05502    0.05570 =
         0.03389    0.02154   -0.00051   -0.01191
AFIX  23
H12A  2    0.254898    0.175028    0.807428    21.00000   -1.20000
H12B  2    0.141396    0.215363    0.865336    21.00000   -1.20000
AFIX   0
PART  2
C10B  1    0.442654    0.382091    0.823728   -21.00000    0.07123    0.05313 =
         0.08579    0.02633   -0.02954   -0.02367
AFIX  23
H10C  2    0.430271    0.434443    0.874991   -21.00000   -1.20000
H10D  2    0.537922    0.382321    0.821373   -21.00000   -1.20000
AFIX   0
C11B  1    0.366155    0.261237    0.847927   -21.00000    0.09342    0.05814 =
         0.05762    0.02005   -0.01762    0.00255
AFIX  23
H11C  2    0.382276    0.243698    0.914156   -21.00000   -1.20000
H11D  2    0.393954    0.204234    0.807098   -21.00000   -1.20000
AFIX   0
C12B  1    0.217892    0.260033    0.831211   -21.00000    0.11795    0.08658 =
         0.08827    0.03260   -0.01124   -0.02218
AFIX  23
H12C  2    0.162490    0.186408    0.851175   -21.00000   -1.20000
H12D  2    0.192744    0.321507    0.868292   -21.00000   -1.20000
AFIX   0
PART  0
C13   1    0.055995    0.243236    0.697140    11.00000    0.06427    0.06871 =
         0.07187    0.02504    0.00095   -0.01018
PART  1
AFIX  23
H13A  2   -0.013826    0.278054    0.723364    21.00000   -1.20000
H13B  2    0.035576    0.162189    0.715308    21.00000   -1.20000
AFIX  23
PART  2
H13C  2    0.004864    0.294888    0.725435   -21.00000   -1.20000
H13D  2    0.017283    0.164849    0.717879   -21.00000   -1.20000
AFIX   0
PART  0
C14   1    0.049325    0.249202    0.590261    11.00000    0.05940    0.06172 =
         0.06931    0.01649   -0.00973   -0.01381
AFIX  23
H14A  2   -0.043532    0.223585    0.568865    11.00000   -1.20000
H14B  2    0.100805    0.197512    0.562454    11.00000   -1.20000
AFIX   0
C15   1    0.105189    0.372303    0.556113    11.00000    0.05049    0.05593 =
         0.05860    0.01431   -0.00465   -0.00168
AFIX  23
H15A  2    0.117024    0.371643    0.487289    11.00000   -1.20000
H15B  2    0.041648    0.420136    0.570414    11.00000   -1.20000
AFIX   0
C16   1    0.545570    0.809093    0.416636    11.00000    0.05549    0.04004 =
         0.04608    0.00568    0.00366    0.00636
AFIX  43
H16   2    0.508631    0.819452    0.357079    11.00000   -1.20000
AFIX   0
C17   1    0.704724    0.976112    0.375720    11.00000    0.06333    0.03946 =
         0.06600    0.01020    0.01121    0.00204
AFIX  23
H17A  2    0.671933    0.952439    0.311615    11.00000   -1.20000
H17B  2    0.802336    0.990828    0.375139    11.00000   -1.20000
AFIX   0
C18   1    0.661981    1.086717    0.402951    11.00000    0.06914    0.04973 =
         0.05384    0.01289    0.00840    0.00948
AFIX  23
H18A  2    0.564457    1.072605    0.399645    11.00000   -1.20000
H18B  2    0.689229    1.106702    0.468765    11.00000   -1.20000
AFIX   0
C19   1    0.719953    1.187654    0.340727    11.00000    0.05481    0.04016 =
         0.05312    0.00814    0.00251    0.00730
C20   1    0.667337    1.217521    0.251734    11.00000    0.04934    0.04593 =
         0.04926    0.00329    0.00312    0.00336
C21   1    0.550420    1.172295    0.198914    11.00000    0.05435    0.07275 =
         0.06544    0.00377   -0.00321   -0.00511
AFIX  43
H21   2    0.489589    1.106573    0.219867    11.00000   -1.20000
AFIX   0
C22   1    0.525765    1.225421    0.115837    11.00000    0.06869    0.10836 =
         0.06658    0.00203   -0.01783    0.01343
AFIX  43
H22   2    0.447974    1.195346    0.080316    11.00000   -1.20000
AFIX   0
C23   1    0.617371    1.325283    0.083800    11.00000    0.09920    0.09641 =
         0.05583    0.01882   -0.00381    0.02913
AFIX  43
H23   2    0.598135    1.361121    0.027970    11.00000   -1.20000
AFIX   0
C24   1    0.733822    1.370358    0.133229    11.00000    0.07966    0.06058 =
         0.05999    0.01607    0.00939    0.01382
AFIX  43
H24   2    0.795335    1.434715    0.110675    11.00000   -1.20000
AFIX   0
C25   1    0.757892    1.317579    0.217976    11.00000    0.05618    0.04344 =
         0.05408    0.00641    0.00491    0.00439
C26   1    0.836888    1.267076    0.355884    11.00000    0.05806    0.05080 =
         0.05547    0.00478   -0.00827    0.00451
AFIX  43
H26   2    0.893133    1.268348    0.408895    11.00000   -1.20000
AFIX   0
C27   1    0.726310    0.727700    0.675961    11.00000    0.05572    0.04335 =
         0.05842    0.00262   -0.00992    0.00338
AFIX  23
H27A  2    0.758784    0.656963    0.668576    11.00000   -1.20000
H27B  2    0.673673    0.721863    0.734003    11.00000   -1.20000
AFIX   0
C28   1    0.846461    0.833028    0.683146    11.00000    0.04907    0.05719 =
         0.06908    0.00210   -0.00632    0.00047
AFIX  23
H28A  2    0.913435    0.814591    0.726565    11.00000   -1.20000
H28B  2    0.887315    0.846850    0.620601    11.00000   -1.20000
AFIX   0
C29   1    0.809564    0.940920    0.717113    11.00000    0.04837    0.04498 =
         0.06287    0.00790   -0.00907   -0.00762
C30   1    0.764232    1.020613    0.664667    11.00000    0.07039    0.05189 =
         0.05863    0.01056   -0.01527   -0.00711
AFIX  43
H30   2    0.756970    1.018881    0.598225    11.00000   -1.20000
AFIX   0
C31   1    0.755570    1.080959    0.814854    11.00000    0.05954    0.04609 =
         0.06882    0.01017   -0.00648   -0.00229
C32   1    0.738837    1.139528    0.898501    11.00000    0.09365    0.05936 =
         0.09015   -0.00196    0.00204    0.01369
AFIX  43
H32   2    0.705777    1.206802    0.896918    11.00000   -1.20000
AFIX   0
C33   1    0.772325    1.095718    0.983930    11.00000    0.13095    0.07583 =
         0.06966   -0.00332    0.00622    0.01754
AFIX  43
H33   2    0.761361    1.133302    1.041068    11.00000   -1.20000
AFIX   0
C34   1    0.823340    0.993851    0.985418    11.00000    0.13263    0.08412 =
         0.06008    0.01500   -0.01197    0.01135
AFIX  43
H34   2    0.846680    0.965649    1.043650    11.00000   -1.20000
AFIX   0
C35   1    0.838920    0.936063    0.902446    11.00000    0.09116    0.05684 =
         0.07006    0.01326   -0.01487    0.00948
AFIX  43
H35   2    0.871856    0.868751    0.904674    11.00000   -1.20000
AFIX   0
C36   1    0.805426    0.978059    0.814509    11.00000    0.05189    0.04409 =
         0.06320    0.00969   -0.00862   -0.00448
MOLE  2
O3    4    0.118821    0.503177    0.256550    11.00000    0.08636    0.07451 =
         0.08678    0.00521   -0.00950   -0.02443
AFIX  83
H3A   2    0.170236    0.552061    0.289145    11.00000   -1.50000
AFIX   0
C37   1    0.143110    0.526461    0.159605    11.00000    0.10668    0.08720 =
         0.10180    0.02691   -0.00473   -0.01586
AFIX  23
H37A  2    0.230926    0.578247    0.153051    11.00000   -1.20000
H37B  2    0.076190    0.565951    0.134869    11.00000   -1.20000
AFIX   0
C38   1    0.138965    0.422359    0.102914    11.00000    0.19891    0.12943 =
         0.09152    0.00348    0.02702    0.03073
AFIX  33
H38A  2    0.204835    0.382720    0.127138    11.00000   -1.50000
H38B  2    0.158404    0.443165    0.037404    11.00000   -1.50000
H38C  2    0.050913    0.372294    0.106680    11.00000   -1.50000
MOLE  0
HKLF  4
 
REM  BO-try-1 in P-1
REM R1 =  0.0834 for   4570 Fo > 4sig(Fo)  and  0.0995 for all   6284 data
REM    452 parameters refined using     14 restraints
 
END  
     
WGHT      0.1400      0.0000 
REM Highest difference peak  0.423,  deepest hole -0.310,  1-sigma level  0.079
Q1    1   0.2783  0.5526  0.5033  11.00000  0.05    0.36
Q2    1   0.0704  0.5282  0.2149  11.00000  0.05    0.34
Q3    1   0.0720  0.3978  0.5002  11.00000  0.05    0.33
Q4    1   0.3832  0.6496  0.3615  11.00000  0.05    0.32
Q5    1   0.6738  1.2053  0.3051  11.00000  0.05    0.32
Q6    1   0.0244  0.2616  0.6507  11.00000  0.05    0.31
Q7    1   0.8619  1.3416  0.2481  11.00000  0.05    0.28
Q8    1   0.8234  0.9688  0.7455  11.00000  0.05    0.28
Q9    1   0.6111  1.0848  0.4555  11.00000  0.05    0.28
Q10   1   0.3150  0.3926  0.7080  11.00000  0.05    0.27
;
_iucr_refine_reflections_details
;
   0   0  -2 118341. 1265.71   2
   0   0  -3 8099.26 415.095   2
   0   0  -4 34692.9 1026.68   2
   0   0  -5 2657.88 328.909   2
   0   0  -6 10570.6 732.732   2
   0   0  -7 45045.0 1690.00   2
   0   0  -8 2421.11 432.489   2
   0   0  -9 42.2223 116.188   2
   0   0 -10 2763.40 570.776   2
   0   0  10 1498.88 188.874   4
   0   0 -11 2257.21 545.420   2
   0   0  11 2104.14 237.486   4
   0   0  12 767.102 144.843   4
   0   0  13 1252.26 193.828   4
   0   0  14 232.286 77.8811   4
   0   0  15 27.8448 33.5810   4
   0   0  16-8.59123 14.2075   4
   0   0 -17 10.6217 5.51182   9
   0   0  17 13.9365 18.0557   4
   0  -1  17-4.44734 3.39637   4
   0   1 -17-9.42184 20.0784   9
   0  -1  16 89.6869 40.0700   4
   0  -1  15 51.6250 39.5183   4
   0  -1  14 174.567 69.4974   4
   0  -1  13 325.574 94.2953   4
   0  -1  12 160.772 66.2442   4
   0   1 -11 888.633 339.757   2
   0  -1  11 851.211 152.195   4
   0   1 -10 10546.8 1055.77   2
   0  -1  10 6374.69 383.220   4
   0   1  -9-40.7035 50.9149   2
   0   1  -8 14322.4 1033.81   2
   0   1  -7 24786.2 1242.84   2
   0   1  -6 27502.9 1172.08   2
   0   1  -5 7788.43 550.253   2
   0   1  -4 30442.1 935.455   2
   0   1  -3 20896.9 633.429   2
   0   1  -2 7966.11 358.189   2
   0   1  -2 8554.26 349.755   1
   0   1  -1 51105.3 708.984   1
   0   1   0 46378.7 651.096   1
   0  -1  -1 45955.1 752.135   2
   0  -1  -2 470.545 99.9044   2
   0  -1  -3 65660.2 1353.60   2
   0  -1  -4 45709.2 1294.78   2
   0  -1  -5 35933.4 1294.09   2
   0  -1  -6 46.6609 39.1256   2
   0  -1  -7 870.984 249.703   2
   0  -1  -8 2982.03 513.555   2
   0  -1  -9 3431.39 601.770   2
   0  -1 -10 681.778 285.295   2
   0   1  10 477.658 109.896   4
   0  -1 -11 95.6626 65.8100   2
   0   1  11 164.980 67.6634   4
   0   1  12 619.331 141.074   4
   0   1  13 140.446 53.7308   4
   0   1  14 43.4013 29.8473   4
   0   1  15 61.9853 44.9629   4
   0   1  16 840.780 119.258   4
   0   1  17 216.784 46.0966   4
   0   2 -17 97.4418 32.7300   9
   0  -2  16 23.4323 30.9899   4
   0  -2  15 195.597 68.9618   4
   0  -2  14 1198.97 181.674   4
   0  -2  13 1879.57 234.140   4
   0  -2  12 596.772 130.023   4
   0   2 -11 290.750 224.981   2
   0  -2  11 120.577 50.9878   4
   0   2 -10 28.8928 60.2395   2
   0  -2  10 20.7242 12.8202   4
   0   2  -9 192.540 123.298   2
   0   2  -8 36.1270 33.9644   2
   0   2  -7 4095.56 506.701   2
   0   2  -6 4310.37 469.549   2
   0   2  -5 1064.82 207.508   2
   0   2  -4 2574.47 264.708   2
   0   2  -3 2874.50 272.079   1
   0   2  -3 3097.69 291.849   2
   0   2  -2 2264.62 212.449   1
   0   2  -1 52114.0 1012.12   1
   0   2   0 20252.1 599.388   1
   0   2   1 1808.21 179.184   1
   0   2   2 57027.1 1146.59   1
   0  -2  -3 4130.55 367.876   2
   0  -2  -4 25468.8 1042.55   2
   0  -2  -5 5945.99 562.531   2
   0  -2  -6 501.796 175.490   2
   0  -2  -7 679.014 232.360   2
   0  -2  -8 3172.27 536.010   2
   0  -2  -9 5495.54 757.462   2
   0  -2 -10 4229.06 699.771   2
   0  -2 -11 221.838 134.300   2
   0   2  12-1.08987 34.2157   4
   0   2  13 115.138 67.2445   4
   0   2  14 46.1811 62.0606   4
   0   2  15 33.6810 31.7988   4
   0   2  16 429.026 83.1124   4
   0   3 -16 79.7208 34.9525   9
   0  -3  16 47.8391 29.9782   4
   0  -3  15 22.0246 15.4597   4
   0  -3  14 731.188 137.525   4
   0  -3  13 37.9010 38.2576   4
   0  -3  12 2863.46 288.169   4
   0   3 -11 3252.49 622.770   2
   0  -3  11 3208.49 295.169   4
   0  -3  10 436.519 106.026   4
   0   3 -10 382.952 202.567   2
   0   3  -9 1179.36 333.459   2
   0   3  -8 4604.35 597.401   2
   0   3  -7 8654.16 752.799   2
   0   3  -6 734.104 199.902   2
   0   3  -5 387.023 120.295   2
   0   3  -4 1432.40 244.188   2
   0   3  -4 1574.05 237.819   1
   0   3  -3 10307.9 577.252   1
   0   3  -2 31674.4 977.860   1
   0   3  -1 13294.8 597.775   1
   0   3   0 25869.7 842.432   1
   0   3   1 16656.2 707.631   1
   0   3   2 7974.15 489.740   1
   0   3   3 457.829 124.370   1
   0   3   4 7182.52 554.195   1
   0  -3  -5 4152.90 496.908   2
   0  -3  -6 5713.77 633.150   2
   0  -3  -7 889.368 262.520   2
   0  -3  -8 1292.69 341.623   2
   0  -3  -9 964.965 319.758   2
   0  -3 -10-103.061 132.699   2
   0  -3 -10-31.9861 31.5171  12
   0   3  11 191.127 127.916   1
   0  -3 -11 358.874 98.9910  12
   0   3  12-6.33467 39.6338   4
   0   3  13 172.472 76.0857   4
   0   3  14 282.005 89.5516   4
   0   3  15 307.515 81.5129   4
   0   3  16 48.7721 25.9246   4
   0  -4  16 104.898 31.3156   4
   0   4 -16 77.6598 34.3164   9
   0  -4  15 1685.04 192.564   4
   0   4 -15 1536.93 186.575   9
   0  -4  14 473.748 107.584   4
   0  -4  13 148.937 61.9947   4
   0  -4  12 226.774 77.5066   4
   0  -4  11 78.1322 30.2746   4
   0   4 -11-79.7354 22.4805   2
   0  -4  10 570.276 119.459   4
   0   4 -10 359.544 167.335   2
   0   4  -9 4226.75 637.494   2
   0  -4   9 4165.31 307.533   4
   0   4  -8 7308.02 778.802   2
   0   4  -7 4256.96 555.011   2
   0   4  -6 18.3613 21.0497   2
   0   4  -5 20920.4 1077.17   2
   0   4  -4 7889.32 595.805   1
   0   4  -3 18372.3 846.425   1
   0   4  -2 2063.25 289.538   1
   0   4  -1 8048.66 558.271   1
   0   4   0 7799.04 548.005   1
   0   4   1 1525.36 254.851   1
   0   4   2 24329.8 1031.91   1
   0   4   3 1899.28 287.859   1
   0   4   4 3610.43 417.839   1
   0   4   5 1834.61 316.238   1
   0   4   6 6545.50 642.699   1
   0   4   7 49.6779 57.7089   1
   0   4   8 160.012 95.7073   1
   0  -4  -9 334.479 82.1145  12
   0   4   9 314.049 179.806   1
   0   4  10-69.5764 131.057   1
   0  -4 -10-15.1601 30.7541  12
   0  -4 -11 767.519 135.660  12
   0  -4 -12 2989.21 270.779  12
   0   4  13-3.97759 19.2150   4
   0   4  14 169.805 64.5250   4
   0   4  15 270.374 78.7483   4
   0   4  16-18.0533 5.30372   4
   0   5 -16-15.6396 18.7596   9
   0  -5  15 61.9560 29.0340   4
   0   5 -15 75.8269 39.8772   9
   0  -5  14 52.9769 43.5362   4
   0   5 -14 32.2721 33.2346   9
   0   5 -13 203.749 76.3364   9
   0  -5  13 211.115 76.5384   4
   0  -5  12 3215.93 305.423   4
   0  -5  11 2313.42 256.619   4
   0   5 -10 3952.17 674.216   2
   0  -5  10 3839.19 323.465   4
   0   5  -9 1331.57 375.032   2
   0  -5   9 1323.16 182.505   4
   0  -5   8 119.615 44.1771   4
   0   5  -8 193.170 140.485   2
   0   5  -7 6573.69 703.826   2
   0   5  -6 5736.90 598.242   2
   0   5  -5 2367.86 373.822   1
   0   5  -5 2613.01 425.371   2
   0   5  -4 9238.10 713.969   1
   0   5  -3 27934.4 1174.57   1
   0   5  -2 9233.74 660.395   1
   0   5  -1 581.950 174.494   1
   0   5   0 4090.35 483.763   1
   0   5   1 3982.83 452.810   1
   0   5   2 7416.89 672.304   1
   0   5   3 11232.0 846.026   1
   0   5   4 12513.6 894.038   1
   0   5   5 1161.08 275.048   1
   0   5   6 3285.64 480.129   1
   0   5   7 908.868 237.652   1
   0   5   8 519.336 222.470   1
   0  -5  -9 377.358 96.3161  12
   0   5   9 446.446 97.4849   8
   0   5   9 465.895 198.665   1
   0  -5 -10 126.264 49.3518  12
   0   5  10-42.6250 157.222   1
   0  -5 -11 238.195 83.7132  12
   0  -5 -12 329.047 94.1426  12
   0  -5 -13-5.80679 18.3986  12
   0   5  13-14.1593 15.3987   4
   0   5  14 1282.11 176.973   4
   0   5  15 677.323 104.963   4
   0   5  16 198.968 44.5438   4
   0  -6  15-15.0702 16.9780   4
   0   6 -15 60.0582 28.6336   9
   0   6 -14 41.5419 23.3110   9
   0  -6  14 21.3141 18.9510   4
   0  -6  13 11.2257 7.29413   4
   0   6 -13 1.27203 24.6941   9
   0  -6  12-40.2416 47.5908   4
   0   6 -12 57.0173 25.5453   9
   0  -6  11 2276.92 273.355   4
   0   6 -11 2220.90 249.505   9
   0  -6  10 17086.0 747.587   4
   0   6 -10 15198.0 650.911   9
   0  -6   9 27582.1 919.396   4
   0   6  -9 27123.1 1709.27   2
   0   6  -8 813.827 264.695   2
   0   6  -8 1391.95 174.608   9
   0  -6   8 979.342 161.125   4
   0   6  -7 7397.14 771.703   2
   0  -6   7 4873.55 354.603   4
   0   6  -6 2214.21 413.658   2
   0   6  -5 2449.25 437.184   2
   0   6  -5 2213.92 407.209   1
   0   6  -4 2145.98 364.926   1
   0   6  -3 1035.88 251.909   1
   0   6  -2 12599.7 894.144   1
   0   6  -1 4996.77 544.793   1
   0   6   0 226.149 97.9146   1
   0   6   1 1524.17 332.713   1
   0   6   2 32041.1 1488.55   1
   0   6   3 10907.8 898.081   1
   0   6   4-86.9612 83.2302   1
   0   6   5 4056.05 592.574   1
   0   6   6 11227.6 1003.42   1
   0   6   7-66.1721 141.085   1
   0  -6  -7 36.7302 27.8200   6
   0   6   8 1324.06 219.823   8
   0   6   8 2476.07 506.368   1
   0   6   9 31.0180 46.1374   8
   0  -6  -9-17.1450 30.0978  12
   0   6  10 42.8424 33.6972   8
   0  -6 -10 119.056 54.8472  12
   0  -6 -11 23.6866 25.6918  12
   0  -6 -12 756.278 136.815  12
   0  -6 -13 401.858 88.5901  12
   0   6  14 3069.21 253.972   4
   0   6  15 1005.80 115.661   4
   0  -7  14 454.926 88.5723   4
   0   7 -14 428.352 79.8113   9
   0   7 -13-15.5182 7.48559   9
   0  -7  13-17.2298 26.4134   4
   0   7 -12 576.701 116.375   9
   0  -7  12 578.741 120.471   4
   0   7 -11 23.1180 18.6492   9
   0  -7  11 52.1899 46.2258   4
   0  -7  10 273.537 86.3356   4
   0   7 -10 234.561 80.3653   9
   0   7  -9 13523.3 599.466   9
   0  -7   9 14854.4 702.863   4
   0   7  -8 6583.59 808.600   2
   0  -7   8 4681.37 388.529   4
   0   7  -8 6324.77 394.432   9
   0   7  -7 180.751 89.6234   2
   0  -7   7 343.244 99.4390   4
   0  -7   6 411.968 105.183   4
   0   7  -6 670.390 258.308   2
   0   7  -5 6651.75 782.045   2
   0   7  -5 6890.37 743.684   1
   0   7  -4 258.294 161.009   1
   0   7  -3 5323.33 643.777   1
   0   7  -2 13905.1 1057.98   1
   0   7  -1 4736.47 582.353   1
   0   7   0-84.2558 171.462   1
   0   7   1 22448.8 1313.31   1
   0   7   2 156.459 93.6607   1
   0   7   3 9638.97 923.487   1
   0   7   4 19.5301 26.0091   1
   0  -7  -5 1980.73 189.002   6
   0   7   5 2948.76 535.155   1
   0  -7  -6 7992.58 418.774  11
   0   7   6 7712.56 894.958   1
   0  -7  -7 18031.7 611.954   6
   0   7   7 12308.7 1180.41   1
   0   7   8 389.974 110.113   8
   0   7   8 331.144 195.676   1
   0   7   9 1270.36 187.065   8
   0  -7  -9 1662.87 210.700  12
   0  -7 -10 53.4595 33.6026  12
   0   7  10-45.8868 49.9784   8
   0  -7 -11 21.2118 33.1390  12
   0  -7 -12 488.708 105.861  12
   0  -7 -13 651.309 107.947  12
   0   7  14 1892.53 176.987   4
   0  -7 -14 1621.92 132.904  12
   0  -8  14 3.84792 3.99153   4
   0  -8  13 121.781 50.1725   4
   0  -8  12 658.659 125.984   4
   0  -8  11 37.4149 40.9733   4
   0  -8  10 119.457 57.7718   4
   0  -8   9 62.6682 53.2127   4
   0  -8   8 3103.13 316.097   4
   0   8  -7 14989.2 1156.99   2
   0  -8   7 12245.1 623.055   4
   0  -8   6 3367.14 318.228   4
   0   8  -6 4327.91 623.797   2
   0  -8   5 385.358 99.2076   4
   0   8  -5 330.913 103.936   1
   0   8  -5 419.481 162.065   2
   0   8  -4 1609.94 391.779   1
   0  -8   4 1016.87 166.581   4
   0  -8   3-19.9639 40.1465   4
   0   8  -3 123.542 86.4956   1
   0  -8   2 21.8016 24.6019   4
   0   8  -2-29.6064 80.8302   1
   0   8  -1 125.748 107.716   1
   0   8   0 38.3445 75.5761   1
   0   8   1 1566.79 385.654   1
   0   8   2 351.549 175.840   1
   0  -8  -2 157.470 55.9514   6
   0   8   3-87.7761 47.6437   1
   0  -8  -3 16.4851 27.1293   6
   0  -8  -4 60.4731 29.4221   6
   0   8   4-17.3839 74.5323   1
   0   8   5 1324.93 388.692   1
   0  -8  -5 1788.73 221.915  11
   0  -8  -5 1400.93 173.737   6
   0   8   6 239.750 145.222   1
   0  -8  -6 311.768 84.9674   6
   0  -8  -7 157.040 61.6210   6
   0   8   8 472.740 143.114   8
   0  -8  -9 643.936 131.561  12
   0   8   9 515.425 140.684   8
   0  -8 -10 639.864 125.054  12
   0   8  10 356.981 93.2382   8
   0  -8 -11 13.2364 15.8523  12
   0   8  11 14.6976 16.9621   8
   0  -8 -12 20.2522 27.5526  12
   0  -8 -13 60.7419 32.5726  12
   0   8  13 72.6656 34.0337   4
   0   8  14 27.7823 11.4112   4
   0  -9  13 55.3030 30.3565   4
   0  -9  12 20.7875 25.5327   4
   0  -9  11 1544.35 187.452   4
   0  -9  10 169.125 52.9959   4
   0  -9   9 349.606 102.408   4
   0  -9   8 4108.91 360.255   4
   0  -9   7 100.504 55.9487   4
   0  -9   6 1243.71 201.055   4
   0   9  -5 1289.30 371.275   2
   0  -9   5 1487.52 215.687   4
   0   9  -5 1711.97 409.834   1
   0  -9   4 335.276 95.3468   4
   0   9  -4 707.970 259.347   1
   0   9  -3 1193.37 347.404   1
   0  -9   3 1258.34 191.524   4
   0   9  -2 2282.64 470.506   1
   0  -9   2 1892.32 236.991   4
   0  -9   2 1641.60 189.108   6
   0   9  -1 472.591 216.485   1
   0  -9   1 506.866 97.2924   6
   0   9   0 325.477 194.868   1
   0  -9   0 270.898 75.3716   6
   0  -9  -1 12.1398 21.1875   6
   0   9   1-30.0004 43.6199   1
   0   9   2 1810.75 444.996   1
   0  -9  -2 1574.81 194.856   6
   0   9   3 341.658 100.706  10
   0  -9  -3 406.397 92.6038   6
   0   9   3 350.268 203.798   1
   0   9   4 59.0046 25.1873   1
   0   9   4 61.1528 15.6619  10
   0  -9  -5 248.579 87.3444   6
   0  -9  -6 500.363 119.343   6
   0   9   8-40.6659 38.2053   8
   0  -9  -9 21.2699 31.5670  12
   0   9   9-19.2091 23.7745   8
   0   9  10-35.0582 3.41687   8
   0  -9 -10 9.25158 12.6688  12
   0   9  11-52.1463 33.6525   8
   0  -9 -11-4.73567 11.3745  12
   0  -9 -12 20.9352 9.98912  12
   0   9  13 57.3950 30.4816   4
   0 -10  12 19.2694 3.20007   4
   0 -10  11 41.8550 19.6866   4
   0 -10  10 1363.12 168.632   4
   0 -10   9 46.5888 24.6207   6
   0 -10   9-12.2395 1.75611   4
   0 -10   8 769.921 114.586   6
   0 -10   8 805.342 144.895   4
   0 -10   7 152.874 62.8248   4
   0 -10   6-21.9014 45.5277   6
   0 -10   6-1.86472 11.8595   4
   0 -10   5 5096.17 342.429   6
   0 -10   5 5119.26 405.194   4
   0 -10   4 583.783 134.869   4
   0 -10   4 574.493 104.802   6
   0 -10   3 773.519 151.979   4
   0 -10   3 746.723 127.846   6
   0 -10   2 5619.42 368.690   6
   0 -10   1 469.509 101.786   6
   0 -10   0 1.25911 10.3064   6
   0 -10  -1 1411.99 186.157   6
   0 -10  -2 7981.91 433.262   6
   0  10   2 7109.68 423.260  10
   0  10   3 1911.86 208.124  10
   0 -10  -3 1826.46 215.239   6
   0  10   4 6307.77 351.420  10
   0 -10  -4 7616.80 441.310   6
   0 -10  -5 147.149 67.2944   6
   0 -10  -6-9.86691 29.7756   6
   0  10   7 42.2296 53.4240   8
   0  10   8 2.71378 12.9591   8
   0 -10  -8 23.9399 30.8149  12
   0  10   9 165.540 79.9418   8
   0 -10  -9 167.493 61.2858  12
   0 -10 -10 15.0984 23.9614  12
   0  10  10-10.3197 20.8655   8
   0 -10 -11-17.4960 14.1991  12
   0  10  11-36.2887 9.21083   8
   0 -10 -12 47.7441 20.7043  12
   0 -11   9 14.6012 7.85182   4
   0 -11   8 443.498 80.4964   6
   0 -11   8 464.502 103.584   4
   0 -11   7 1127.54 136.365   6
   0 -11   7 1140.01 170.959   4
   0 -11   6 3474.01 260.147   6
   0 -11   6 3760.24 320.937   4
   0 -11   5 98.5534 51.2560   6
   0 -11   4 415.007 92.4442   6
   0 -11   3-10.3733 30.5801   6
   0 -11   2 1522.24 189.969   6
   0 -11   1 2177.86 230.985   6
   0 -11   0 1461.15 186.945   6
   0  11   0 1266.03 172.338  10
   0 -11  -1 21.3425 31.0827   6
   0  11   1-22.8069 52.7010  10
   0  11   2 426.687 99.8851  10
   0 -11  -2 473.588 113.515   6
   0  11   3 341.157 79.9379  10
   0 -11  -3 486.510 107.268   6
   0 -11  -4 162.756 67.7609   6
   0  11   4 147.965 52.7705  10
   0 -11  -5 72.1481 23.8612   6
   0  11   6 1263.05 199.944   8
   0 -11  -7-10.8082 30.7293  12
   0  11   7-32.1131 44.7134   8
   0 -11  -8 101.489 41.2435  12
   0  11   8 134.734 51.6795   8
   0 -11  -9 79.2563 34.4073  12
   0  11   9-0.08376 19.0944   8
   0 -11 -10-11.1691 21.2762  12
   0  11  10 19.1762 14.1058   8
   0  12  -8 1.69375 5.57611  10
   0  12  -7 78.2910 30.5508  10
   0 -12   7 93.4305 17.9304   6
   0 -12   6 293.630 65.0085   6
   0  12  -6 270.964 67.9090  10
   0 -12   5 221.331 59.7867   6
   0 -12   4 119.776 48.7361   6
   0 -12   3 342.201 76.6858   6
   0  12  -3 276.982 79.8969  10
   0  12  -2 62.2262 21.5733  10
   0 -12   2 150.066 48.6057   6
   0  12  -1 395.269 94.1370  10
   0 -12   1 396.423 82.6727   6
   0  12   0 881.019 138.457  10
   0 -12   0 992.399 137.878   6
   0 -12  -1 136.638 53.4647   6
   0  12   1 97.7705 50.6229  10
   0  12   2 637.644 104.367  10
   0 -12  -2 809.933 133.096   6
   0  12   3 848.901 111.242  10
   0 -12  -3 1142.04 158.889   6
   0 -12  -4 1964.60 203.478   6
   0  12   5 6792.67 417.827   8
   0  12   6 1790.01 194.988   8
   0 -12  -6 1745.80 176.995  12
   0 -12  -7-29.6293 29.0775  12
   0  12   7 4.33664 14.3794   8
   0  12   8 49.4474 23.1259   8
   0 -12  -8-15.8522 13.2972  12
   0 -12  -9 49.7942 21.5791  12
   0  13  -7 129.166 32.1515  10
   0 -13   6 14.0195 14.0301   6
   0  13  -6 67.2212 30.0933  10
   0  13  -5 736.518 96.9219  10
   0 -13   5 703.583 79.3919   6
   0  13  -4 394.071 76.4895  10
   0 -13   4 387.722 64.0397   6
   0  13  -3 178.174 50.6062  10
   0 -13   3 145.075 45.2469   6
   0  13  -2 166.051 49.4776  10
   0 -13   2 206.288 47.9112   6
   0  13  -1 1505.76 153.800  10
   0 -13   1 1710.95 161.993   6
   0 -13   0 903.269 117.799   6
   0  13   0 803.026 109.122  10
   0  13   1 724.946 93.0658  10
   0 -13  -1 1072.83 133.190   6
   0 -13  -2 90.3088 39.8765   6
   0  13   2 27.0232 21.2601  10
   0  13   3 965.839 142.510   8
   0 -13  -3 1563.00 159.515   6
   0  13   4 1156.72 149.703   8
   0 -13  -4 1125.54 123.509  12
   0  13   5 1020.68 130.473   8
   0 -13  -5 908.244 106.563  12
   0  13   6 1094.95 124.775   8
   0 -13  -6 1001.46 103.270  12
   0  13   7 868.533 92.6062   8
   0 -13  -7 739.887 80.0829  12
   0  14  -3 4.46407 15.2480  10
   0  14  -2 545.512 65.2485  10
   0 -14   2 623.651 69.0326   6
   0  14  -1 202.412 40.5598  10
   0 -14   1 253.609 46.1367   6
   0  14   0 2.07697 7.56996  10
   0 -14   0-6.32236 13.9877   6
   0 -14  -1 578.566 73.2620   6
   0  14   1 436.048 63.4580   8
   0  14   2 264.253 49.4937   8
   0  14   3 47.9201 18.5475   8
  -1  14   4 226.785 48.3614   8
  -1  14   3 346.025 58.3359   8
  -1  14   2 39.3378 43.3860   8
   1 -14  -2 34.1797 20.4003   6
   1 -14  -1 16.9711 19.4769   6
  -1  14   0 3.16951 5.58944  10
   1 -14   0 42.5000 28.9269   6
  -1  14  -1-46.7819 26.5743  10
   1 -14   1 6.66971 15.4425   6
   1 -14   2 262.350 50.8819   6
  -1  14  -2 179.432 39.2015  10
  -1  14  -3-1.09497 11.0534  10
   1 -14   3 8.66846 4.08094   6
  -1  14  -4-25.4901 16.9356  10
   1 -14   4 26.1145 18.7880   6
  -1  13   7 13.4146 4.36045   8
   1 -13  -7 59.9133 24.1804  12
  -1  13   6 200.352 54.4787   8
   1 -13  -6 128.065 38.8135  12
  -1  13   5 301.349 73.6574   8
   1 -13  -5 318.611 64.2665  12
   1 -13  -4 617.893 99.5756   6
   1 -13  -4 456.651 78.0723  12
   1 -13  -3 27.4236 21.5417   6
   1 -13  -3 7.69856 5.00315  12
   1 -13  -2 127.340 43.2983  12
  -1  13   2 123.828 31.9247  10
   1 -13  -2 142.174 52.3937   6
   1 -13  -1 14.8958 8.71779   6
  -1  13   1-13.3539 18.6936  10
  -1  13   0-17.1316 22.4946  10
   1 -13   0-6.17805 19.9489   6
   1 -13   1 613.456 99.1340   6
  -1  13  -1 627.849 105.222  10
  -1  13  -2 2031.73 197.710  10
   1 -13   2 2341.30 195.242   6
  -1  13  -3 2577.71 221.670  10
   1 -13   3 2996.85 219.303   6
   1 -13   4 49.9078 28.8261   6
  -1  13  -4 27.2735 31.4073  10
   1 -13   5 145.731 39.9926   6
  -1  13  -5 125.824 46.1237  10
   1 -13   6-11.0632 19.1004   6
  -1  13  -6 2.75457 5.10103  10
   1 -13   7 35.5921 17.1146   6
  -1  13  -7-20.4018 15.2490  10
   1 -12  -9 68.5778 25.3266  12
   1 -12  -8 30.2765 11.1315  12
  -1  12   8 35.6941 15.7758   8
   1 -12  -7 16.6387 10.9172  12
  -1  12   7 0.56582 12.4988   8
  -1  12   6 183.287 81.1870   8
   1 -12  -6 163.298 55.0506  12
   1 -12  -5 39.7500 28.1649  12
   1 -12  -5 55.7565 30.6755   6
   1 -12  -4 220.870 71.1617   6
   1 -12  -3 491.685 109.849   6
  -1  12   2-45.4892 14.8854  10
   1 -12  -2 51.6512 37.0009   6
  -1  12   1 4.14220 29.5640  10
   1 -12  -1 0.64020 19.5088   6
   1 -12   0 61.6017 41.9653   6
  -1  12   0 87.7783 44.8232  10
   1 -12   1 178.834 60.8224   6
   1 -12   2 300.711 81.2021   6
   1 -12   3 97.7729 53.5034   6
   1 -12   4 131.183 49.6176   6
   1 -12   5 1246.54 154.992   6
   1 -12   6 142.689 49.5013   6
   1 -12   7 22.0444 16.8423   6
   1 -12   8-3.88367 11.4546   6
  -1  12  -9 38.6441 21.7805  10
   1 -11 -11 239.649 49.8375  12
  -1  11  10 27.4986 18.9410   8
   1 -11 -10-50.1313 35.4522  12
  -1  11   9 42.8120 17.2837   8
   1 -11  -9 83.0748 36.5036  12
   1 -11  -8 8.61414 2.86841  12
  -1  11   8 46.1605 37.7352   8
   1 -11  -7 46.9396 36.5004  12
  -1  11   7 98.7567 84.6015   8
   1 -11  -6 19.6292 25.3780   6
   1 -11  -5 821.310 146.849   6
   1 -11  -4 597.868 123.414   6
   1 -11  -3 2325.40 244.430   6
  -1  11   3 1890.99 193.752  10
   1 -11  -2 1071.08 164.007   6
  -1  11   2 748.659 133.182  10
   1 -11  -1-2.57099 29.0174   6
   1 -11   0 0.12905 35.4464   6
   1 -11   1 143.472 60.3269   6
   1 -11   2 33.2958 33.6151   6
   1 -11   3 1736.24 205.675   6
   1 -11   4 172.283 69.2783   6
   1 -11   5 402.536 92.6925   6
   1 -11   5 377.766 106.047   4
   1 -11   6 1036.51 149.353   6
   1 -11   6 1085.65 180.194   4
   1 -11   7 1255.54 158.808   6
   1 -11   7 1343.01 192.998   4
   1 -11   8 55.0885 29.6079   4
   1 -11   8-13.2639 14.1446   6
   1 -11   9 141.563 54.2843   4
   1 -11   9 95.8454 34.0812   6
   1 -11  10 513.986 71.7108   6
   1 -11  10 671.371 105.970   4
   1 -11  11 1446.56 132.766   4
   1 -10 -12 26.3947 16.1724  12
   1 -10 -11 413.228 84.6022  12
   1 -10 -10 528.180 103.945  12
  -1  10  10 348.781 81.7637   8
   1 -10  -9 108.107 56.8743  12
  -1  10   9-23.2667 32.9186   8
   1 -10  -8 441.220 105.168  12
  -1  10   8 416.261 106.753   8
   1 -10  -7 35.7425 23.2514  12
   1 -10  -6 110.238 52.1828   6
   1 -10  -5 1710.11 234.342  11
   1 -10  -5 1458.86 211.988   6
   1 -10  -4 61.7474 29.5963   6
   1 -10  -3 2469.46 246.019   6
  -1  10   3 2015.04 202.956  10
   1 -10  -2 4571.87 334.822   6
   1 -10  -1-20.9554 21.6404   6
  -1  10   1 102.752 126.015   1
   1 -10   0 1401.35 182.139   6
  -1  10   0 1244.85 352.374   1
   1 -10   1 1837.70 210.892   6
  -1  10  -1 1846.63 474.387   1
  -1  10  -2 97.0618 131.600   1
   1 -10   2 54.9905 37.7056   6
   1 -10   2 61.1465 45.2289   4
   1 -10   3 481.968 120.537   4
   1 -10   3 518.722 111.471   6
   1 -10   4 1477.22 218.640   4
   1 -10   5 9977.61 578.439   4
   1 -10   6 162.214 77.5116   4
   1 -10   7 0.95715 44.0849   4
   1 -10   8-18.4889 44.7237   4
   1 -10   9 292.529 86.7222   4
   1 -10  10 77.2157 50.4593   4
   1 -10  11-16.2624 19.2164   6
   1 -10  11 65.4584 39.7057   4
   1 -10  12 37.8193 29.5810   4
  -1   9  13 95.5547 33.7505   4
   1  -9 -13 125.199 36.9234  12
   1  -9 -12 23.8422 17.6708  12
   1  -9 -11 205.455 72.4819  12
   1  -9 -10 1206.08 175.490  12
  -1   9  10 966.916 165.427   8
   1  -9  -9 70.7002 37.7141  12
  -1   9   9 10.7603 31.5173   8
  -1   9   8 465.965 133.991   8
   1  -9  -8 664.646 130.885  12
   1  -9  -7 17.9017 32.2466   6
   1  -9  -6 3187.10 283.718   6
   1  -9  -6 3131.90 311.453  11
   1  -9  -5 2645.72 288.333  11
   1  -9  -5 1879.36 224.413   6
  -1   9   5 1546.56 420.280   1
   1  -9  -4 117.746 43.9063  11
   1  -9  -4 103.256 51.3387   6
  -1   9   4 113.897 110.965   1
   1  -9  -3 123.188 60.2021  11
   1  -9  -3 125.512 44.2083   6
  -1   9   3 154.160 98.7020   1
  -1   9   2 1580.06 385.091   1
   1  -9  -2 1594.20 202.561   6
   1  -9  -1 186.894 70.3445   6
  -1   9   1 295.912 165.009   1
   1  -9   0-19.9483 42.3998   6
  -1   9   0-210.373 134.777   1
   1  -9   1 1.94411 27.8506   6
   1  -9   1 30.6955 55.0008   4
  -1   9  -1 68.1203 113.944   1
  -1   9  -2 155.742 152.386   1
   1  -9   2-0.59863 35.8168   4
   1  -9   3 387.582 98.8781   4
  -1   9  -3 727.588 231.459   1
  -1   9  -4-49.1468 64.7826   1
  -1   9  -4-32.0686 90.9686   2
   1  -9   4 19.1393 27.1713   4
   1  -9   5 7370.16 490.862   4
  -1   9  -5 6768.76 769.238   1
   1  -9   6 15732.7 724.577   4
   1  -9   7 6803.20 478.884   4
   1  -9   8 1696.89 234.021   4
   1  -9   9 2693.31 293.769   4
   1  -9  10 1055.85 175.954   4
   1  -9  11 234.371 78.6389   4
   1  -9  12 30.7328 8.10796   4
   1  -9  13 1008.67 123.463   4
   1  -8 -14 308.707 53.3134  12
  -1   8  14 371.750 62.5109   4
   1  -8 -13-0.88118 17.8951  12
  -1   8  13 3.76575 9.01718   4
   1  -8 -12 136.292 57.9463  12
   1  -8 -11 61.6082 39.4735  12
   1  -8 -10 441.114 108.549  12
  -1   8   9 1371.96 192.610   8
   1  -8  -9 2009.50 235.605  12
   1  -8  -8 940.972 159.726  12
  -1   8   8 612.590 164.392   8
  -1   8   7 147.006 57.5575   1
   1  -8  -7 103.432 37.9940  11
  -1   8   6 831.281 285.926   1
   1  -8  -6 518.125 123.355  11
   1  -8  -6 1069.93 152.090   6
   1  -8  -5 2596.26 246.537   6
   1  -8  -5 3491.88 286.835  11
   1  -8  -4 1154.20 152.644   6
   1  -8  -4 1358.21 209.464  11
  -1   8   4 839.805 254.313   1
  -1   8   3-57.0955 100.876   1
   1  -8  -3 28.1785 25.3419   6
  -1   8   2 2045.53 440.544   1
  -1   8   1 17210.7 1216.96   1
  -1   8   0 84295.9 2655.89   1
  -1   8  -1 2879.69 478.282   1
  -1   8  -2 1775.79 379.930   1
   1  -8   3 4530.04 345.090   4
  -1   8  -3 8377.62 810.530   1
   1  -8   4 226.645 75.5875   4
  -1   8  -4 284.382 128.100   1
  -1   8  -5 197.781 133.387   2
   1  -8   5 138.833 61.5889   4
  -1   8  -5 312.616 200.489   1
   1  -8   6 10832.5 580.834   4
  -1   8  -6 13094.3 972.933   2
   1  -8   7 16738.2 743.603   4
  -1   8  -7 13954.5 1094.88   2
   1  -8   8 134.713 58.6749   4
   1  -8   9 699.363 151.669   4
   1  -8  10 331.718 107.834   4
   1  -8  11 464.430 116.001   4
   1  -8  12 98.8997 41.4430   4
   1  -8  13 830.153 131.463   4
   1  -8  14 1810.35 159.596   4
  -1   7  14 149.885 51.3019   4
   1  -7 -14 174.203 51.9870  12
  -1   7  13 110.511 57.4153   4
   1  -7 -13 113.872 47.2827  12
   1  -7 -12-48.2701 44.0728  12
   1  -7 -11 105.628 57.3472  12
   1  -7 -10 1149.08 181.248  12
  -1   7   9 55.4524 33.5243   8
   1  -7  -9 48.3057 17.0347  12
  -1   7   8 525.799 100.492   8
   1  -7  -8 819.154 148.533  12
  -1   7   8 615.259 232.326   1
   1  -7  -7 5419.78 404.764  11
  -1   7   7 5985.26 815.103   1
  -1   7   6 2045.20 451.494   1
   1  -7  -6 1569.57 181.356  11
  -1   7   5 73.2557 98.9959   1
  -1   7   4-42.0762 97.0493   1
  -1   7   3 1139.65 285.310   1
  -1   7   2 3409.83 516.696   1
  -1   7   1 15035.3 1053.96   1
  -1   7   0 15143.4 1056.62   1
  -1   7  -1 20970.9 1173.93   1
  -1   7  -2 6125.91 666.867   1
  -1   7  -3 1308.42 287.013   1
  -1   7  -4 1276.73 300.332   1
  -1   7  -5 1881.57 375.944   2
  -1   7  -5 1805.98 355.214   1
  -1   7  -6 1257.87 284.281   2
   1  -7   6 1049.74 168.739   4
  -1   7  -7 4774.67 632.813   2
   1  -7   7 3341.71 320.350   4
  -1   7  -8 7474.16 825.366   2
   1  -7   8 5178.56 416.307   4
   1  -7   9-50.7758 49.4704   4
   1  -7  10 7.08429 22.4762   4
   1  -7  11 270.821 98.0947   4
  -1   7 -12 27.1232 31.0992   9
   1  -7  12-5.83397 20.0344   4
   1  -7  13 925.168 152.374   4
   1  -7  14 349.369 80.9045   4
   1  -7  15 61.6057 27.8934   4
  -1   6  15 45.6154 20.6543   4
  -1   6  14 257.846 70.5785   4
   1  -6 -14 264.962 60.0905  12
   1  -6 -13 669.792 128.233  12
  -1   6  13 488.029 114.946   4
   1  -6 -12 181.622 72.7245  12
   1  -6 -11 170.651 62.1421  12
   1  -6 -10 819.278 148.794  12
   1  -6  -9 25.3184 19.8763  12
  -1   6   9 115.399 121.469   1
   1  -6  -8 184.351 63.5836  12
  -1   6   8 214.037 61.2495   8
  -1   6   8 178.923 141.316   1
   1  -6  -7 176.155 67.4507  11
  -1   6   7 279.520 145.522   1
  -1   6   6 1034.22 299.996   1
  -1   6   5 770.652 240.903   1
  -1   6   4 639.577 202.455   1
  -1   6   3 726.288 228.926   1
  -1   6   2 4392.00 534.582   1
  -1   6   1 246.094 141.394   1
  -1   6   0 5435.71 599.031   1
  -1   6  -1 1239.47 288.953   1
  -1   6  -2 3362.97 435.910   1
  -1   6  -3 7556.62 633.812   1
  -1   6  -4 7868.04 692.341   1
  -1   6  -5 905.610 247.240   2
  -1   6  -5 774.767 222.934   1
  -1   6  -6 196.527 101.929   2
  -1   6  -7 476.848 164.084   2
   1  -6   7 274.694 79.8849   4
  -1   6  -8 5119.11 669.436   2
   1  -6   8 3227.44 299.294   4
  -1   6  -9 22723.6 1471.40   2
   1  -6   9 14793.3 661.034   4
   1  -6  10 1832.84 240.590   4
   1  -6  11 1690.16 231.796   4
  -1   6 -11 1783.93 222.588   9
  -1   6 -12 158.009 68.6640   9
   1  -6  12 189.744 86.3799   4
   1  -6  13 512.375 121.533   4
  -1   6 -13 470.364 99.2775   9
  -1   6 -14 303.176 76.4864   9
   1  -6  14 350.830 87.4889   4
  -1   6 -15 164.654 47.3763   9
   1  -6  15 148.063 49.1507   4
  -1   5  15 32.9888 22.2600   4
  -1   5  14 247.258 71.1143   4
   1  -5 -14 258.553 70.5578  12
  -1   5  13 60.0632 34.2499   4
   1  -5 -13 93.2318 41.9400  12
   1  -5 -12 1180.17 178.101  12
   1  -5 -11 319.501 91.7951  12
   1  -5 -10 2455.63 251.756  12
  -1   5  10 1832.16 428.489   1
   1  -5  -9 1263.03 171.152  12
  -1   5   9 1247.03 331.052   1
   1  -5  -8-6.01413 24.9464  12
  -1   5   8 88.0816 73.9046   1
  -1   5   7 1409.07 323.530   1
  -1   5   6 2943.04 449.842   1
  -1   5   5 12.3152 56.1717   1
  -1   5   4 14212.6 900.480   1
  -1   5   3 13379.7 864.487   1
  -1   5   2 1682.81 302.326   1
  -1   5   1 22.8319 47.2092   1
  -1   5   0 33396.9 1277.49   1
  -1   5  -1 704.080 182.990   1
  -1   5  -2 12225.1 709.089   1
  -1   5  -3 45.0584 31.5451   1
  -1   5  -4 68.1155 57.9496   1
  -1   5  -5 3940.04 447.512   2
  -1   5  -5 4269.88 470.866   1
  -1   5  -6 642.964 196.879   2
  -1   5  -7 1352.34 301.609   2
  -1   5  -8 6699.80 741.716   2
   1  -5   8 3927.55 300.331   4
   1  -5   9 3751.27 311.600   4
  -1   5  -9 6117.85 756.094   2
  -1   5 -10 980.721 297.950   2
   1  -5  10 706.807 141.482   4
   1  -5  11 447.257 120.604   4
   1  -5  12 27.5002 36.3640   4
   1  -5  13 45.9845 51.9311   4
   1  -5  14 336.516 89.2346   4
  -1   5 -14 440.876 101.421   9
   1  -5  15 57.5475 38.5738   4
  -1   5 -15 69.0772 38.4788   9
   1  -5  16 1.94559 15.6617   4
  -1   4  16 381.594 63.5914   4
  -1   4  15-13.4327 30.2401   4
  -1   4  14 442.201 105.069   4
   1  -4 -14 451.970 97.3647  12
  -1   4  13-21.4105 33.8959   4
   1  -4 -13-19.9054 44.8127  12
   1  -4 -12 20.9724 36.7209  12
   1  -4 -11 54.3125 17.6466  12
   1  -4 -10 148.128 53.1349  12
  -1   4  10-46.4791 87.4347   1
  -1   4   9 2372.24 485.023   1
   1  -4  -9 1467.44 174.360  12
   1  -4  -8 900.431 314.909   2
   1  -4  -7 697.651 252.215   2
  -1   4   6 134.214 46.0534   1
  -1   4   5 1430.65 284.611   1
  -1   4   4 1141.56 235.363   1
  -1   4   3 4403.38 424.393   1
  -1   4   2 5652.43 458.765   1
  -1   4   1 1147.06 208.099   1
  -1   4   0 4406.86 393.073   1
  -1   4  -1 6132.75 457.265   1
  -1   4  -2 39.7554 55.5124   1
  -1   4  -3 16222.0 735.699   1
  -1   4  -4 6747.93 502.509   1
  -1   4  -4 7394.15 560.925   2
  -1   4  -5 6378.85 497.437   2
  -1   4  -6 3212.72 414.166   2
  -1   4  -7 61.7110 66.0384   2
  -1   4  -8 349.021 188.985   2
  -1   4  -9 187.514 124.033   2
   1  -4   9 111.568 49.9319   4
   1  -4  10 3508.35 307.745   4
  -1   4 -10 5165.59 727.499   2
   1  -4  11 1434.90 203.427   4
  -1   4 -11 1264.32 376.273   2
   1  -4  12 2728.32 294.396   4
   1  -4  13 2018.29 247.171   4
   1  -4  14 99.1150 57.0739   4
   1  -4  15 74.2589 46.6928   4
  -1   4 -15 0.11354 16.6865   9
   1  -4  16 325.314 71.0507   4
  -1   4 -16 269.169 61.9580   9
  -1   3  16 11.9603 13.9027   4
  -1   3  15 45.3044 19.6786   4
  -1   3  14 17.2897 7.60776   4
  -1   3  13 58.7651 36.1496   4
   1  -3 -13 89.1875 53.0105  12
   1  -3 -12 480.736 112.579  12
  -1   3  12 581.459 137.687   4
   1  -3 -11 150.101 54.4838   2
   1  -3 -11 611.661 122.190  12
   1  -3 -10 2697.56 244.965  12
   1  -3 -10 2095.10 491.949   2
   1  -3  -9 2940.58 560.659   2
   1  -3  -8 846.818 281.235   2
   1  -3  -7 3043.82 482.453   2
   1  -3  -6 5016.82 575.708   2
   1  -3  -5 7266.65 627.535   2
   1  -3  -4 19954.7 953.358   2
   1  -3  -3 59927.6 1517.46   2
  -1   3   2 131952. 1934.30   1
  -1   3   1 75214.2 1355.43   1
  -1   3   0 13317.5 581.961   1
  -1   3  -1 54445.6 1067.46   1
   1  -3   1 54298.0 1212.44   3
   1  -3   2 50538.5 1126.95   3
  -1   3  -2 50054.1 1063.70   1
   1  -3   3 276.639 69.0709   3
  -1   3  -3 296.821 93.9472   1
  -1   3  -4 22137.7 811.791   2
   1  -3   4 24437.9 717.617   3
  -1   3  -5 4770.03 431.632   2
  -1   3  -6 65908.1 1822.76   2
  -1   3  -7 28479.2 1324.43   2
  -1   3  -8 1796.19 367.370   2
  -1   3  -9 1547.48 363.561   2
   1  -3  10 789.546 144.086   4
  -1   3 -10 631.801 231.113   2
   1  -3  11 2953.65 289.014   4
  -1   3 -11 3503.70 641.649   2
   1  -3  12 2787.32 289.407   4
   1  -3  13 47.1221 37.8703   4
   1  -3  14 92.7159 55.5809   4
   1  -3  15 246.757 68.7916   4
  -1   3 -16-10.6990 7.83112   9
   1  -3  16-20.8525 28.8893   4
  -1   2  16 315.671 62.9621   4
  -1   2  15 185.422 53.2646   4
  -1   2  14-26.2059 39.7304   4
  -1   2  13 678.906 137.209   4
  -1   2  12 1030.59 174.572   4
   1  -2 -12 1083.00 164.375  12
   1  -2 -11 1266.70 174.914  12
   1  -2 -11 566.115 300.641   2
  -1   2  11 735.064 150.434   4
   1  -2 -10 14647.3 559.672  12
   1  -2 -10 13134.5 1258.07   2
   1  -2  -9 15784.8 1302.26   2
   1  -2  -8 69.7500 95.5436   2
   1  -2  -7 171.735 102.499   2
   1  -2  -6 722.043 213.040   2
   1  -2  -5 212.675 119.574   2
   1  -2  -4 4.81898 44.3101   2
   1  -2  -3 388874. 3587.85   2
   1  -2  -2 311444. 2640.58   2
   1  -2  -2 318708. 2587.43   3
  -1   2   1 218667. 1910.91   1
  -1   2   0 12623.5 412.756   1
  -1   2  -1 99562.4 1112.56   1
   1  -2   1 103973. 1324.89   3
   1  -2   2 52053.1 941.081   3
  -1   2  -2 63176.6 1022.16   1
   1  -2   3 4182.03 257.740   3
  -1   2  -3 3378.64 244.795   2
   1  -2   4 3501.75 223.947   3
  -1   2  -4 3972.98 338.401   2
  -1   2  -5 1004.78 191.780   2
   1  -2   5 995.819 103.480   3
  -1   2  -6 92.0693 46.3118   2
  -1   2  -7 21428.5 1144.06   2
  -1   2  -8 1733.70 345.253   2
  -1   2  -9 250.880 162.941   2
  -1   2 -10 702.925 277.386   2
   1  -2  10 339.375 81.4555   4
   1  -2  11 24.9924 32.0358   4
  -1   2 -11 72.1780 102.833   2
   1  -2  12 2345.13 261.681   4
   1  -2  13 1824.58 233.651   4
   1  -2  14 5358.88 391.362   4
   1  -2  15 1747.43 204.628   4
   1  -2  16 115.993 44.8952   4
  -1   2 -17-36.6931 26.8069   9
   1  -2  17 5.97340 2.62130   4
   1  -1 -17 177.385 45.3763   9
  -1   1  16 2092.64 178.093   4
  -1   1  15 255.238 68.0687   4
  -1   1  14 876.005 143.503   4
  -1   1  13 983.608 166.536   4
  -1   1  12 2059.71 237.169   4
   1  -1 -11-0.69793 127.681   2
   1  -1 -11-12.6126 44.9983  12
  -1   1  11 3.97804 35.2354   4
  -1   1  10 7623.06 428.252   4
   1  -1 -10 11316.8 1197.59   2
   1  -1  -9 23793.3 1599.29   2
   1  -1  -8 577.055 215.852   2
   1  -1  -7 8092.93 742.041   2
   1  -1  -6 288.808 123.472   2
   1  -1  -5 66.7920 44.7546   2
   1  -1  -4 3812.33 352.969   2
   1  -1  -3 53.6763 29.6512   2
   1  -1  -3 48.0829 22.2907   3
   1  -1  -2 10725.1 389.854   3
   1  -1  -2 12259.3 452.676   2
   1  -1  -1 58953.0 742.447   2
  -1   1   0 2855.02 124.025   1
   1  -1   1 131209. 1212.03   3
  -1   1  -1 134228. 756.316   1
   1  -1   2 6142.94 257.499   3
  -1   1  -2 9292.17 334.786   2
   1  -1   3 4090.54 209.775   3
  -1   1  -3 6121.87 352.889   2
  -1   1  -4 12301.5 589.544   2
   1  -1   4 12809.3 385.605   3
  -1   1  -5 13331.3 714.994   2
   1  -1   5 12918.9 371.773   3
  -1   1  -6 4938.54 487.695   2
  -1   1  -7 37342.4 1505.82   2
  -1   1  -8 47345.4 1890.22   2
  -1   1  -9 7634.43 842.025   2
   1  -1  10-10.1960 22.9557   4
  -1   1 -10 11.0780 54.3170   2
  -1   1 -11 2331.09 562.605   2
   1  -1  11 2220.98 248.123   4
   1  -1  12 100.812 50.8667   4
   1  -1  13 397.574 113.228   4
   1  -1  14 2562.56 271.853   4
   1  -1  15 185.786 68.4323   4
   1  -1  16 282.163 70.8495   4
   1  -1  17 28.4250 23.9420   4
  -1   1 -17 5.10375 11.6796   9
   1   0 -17 71.3817 33.0649   9
  -1   0  16 403.369 79.3854   4
  -1   0  15 86.3232 37.6721   4
  -1   0  14-5.95701 32.7870   4
  -1   0  13 2046.36 233.224   4
  -1   0  12 384.072 98.5268   4
   1   0 -11 1083.00 393.057   2
  -1   0  11 1333.79 183.706   4
  -1   0  10 421.487 98.7953   4
   1   0 -10 265.592 137.713   2
   1   0  -9 168.750 117.664   2
   1   0  -8 420.864 165.641   2
   1   0  -7 11977.3 893.273   2
   1   0  -6 629.608 180.461   2
   1   0  -5 17335.3 838.088   2
   1   0  -4 65461.3 1424.78   2
   1   0  -3 13061.0 312.446   3
   1   0  -3 16079.4 596.051   2
   1   0  -2 148.986 34.0612   3
   1   0  -2 162.453 45.5712   2
   1   0   0 70677.4 570.402   1
  -1   0  -1 90191.5 926.014   2
   1   0   1 85934.8 701.677   1
  -1   0  -2 102984. 1321.96   2
  -1   0  -3 44265.3 1014.87   2
  -1   0  -4 2756.06 290.175   2
  -1   0  -5 5786.48 484.668   2
  -1   0  -6 4519.19 491.816   2
   1   0   6 3726.74 234.136   3
  -1   0  -7 9526.96 810.097   2
  -1   0  -8 12345.5 1020.88   2
  -1   0  -9 846.233 270.423   2
   1   0  10-20.4213 26.2712   4
  -1   0 -10 134.517 162.051   2
   1   0  11 210.823 72.4600   4
  -1   0 -11 7.10354 163.855   2
   1   0  12 793.499 157.269   4
   1   0  13 1860.76 237.847   4
   1   0  14 341.916 95.5283   4
   1   0  15 560.055 119.574   4
   1   0  16 16.2551 22.9041   4
   1   0  17 19.9576 11.7764   4
   1   1 -17 4.42693 4.18069   9
   1   1 -16 0.85367 3.63493   9
  -1  -1  16 3.77040 20.5129   4
  -1  -1  15 111.482 53.0602   4
  -1  -1  14 974.491 157.748   4
  -1  -1  13 70.9579 41.5699   4
  -1  -1  12 643.623 129.774   4
  -1  -1  11 1586.32 192.958   4
   1   1 -11 1862.27 517.118   2
   1   1 -10 139.380 143.675   2
  -1  -1  10 221.920 68.0094   4
   1   1  -9-73.2755 87.0346   2
   1   1  -8 7638.73 781.003   2
   1   1  -7 1726.07 329.138   2
   1   1  -6 212.340 104.526   2
   1   1  -5 2165.65 300.179   2
   1   1  -4 21170.9 782.138   2
   1   1  -3 943.910 71.4267   3
   1   1  -3 1048.88 167.781   2
   1   1  -2 29612.1 760.892   1
   1   1  -1 75689.8 1027.62   1
   1   1   0 19115.3 491.405   1
   1   1   1 13785.3 435.147   1
  -1  -1  -2 7882.98 422.989   2
   1   1   2 7988.59 370.869   1
  -1  -1  -3 60970.1 1340.67   2
  -1  -1  -4 18971.6 865.706   2
  -1  -1  -5 1770.27 292.494   2
  -1  -1  -6 20642.8 1126.31   2
  -1  -1  -7 35894.4 1637.79   2
  -1  -1  -8 78.6257 88.7443   2
  -1  -1  -9 3154.73 570.805   2
  -1  -1 -10 31.5936 85.0410   2
   1   1  11 89.3047 50.2113   4
  -1  -1 -11 45.3440 93.7599   2
   1   1  12 2943.28 306.758   4
   1   1  13 72.0439 57.8754   4
   1   1  14 448.230 116.252   4
   1   1  15 291.834 84.4994   4
   1   1  16-0.36324 23.8346   4
   1   1  17 106.506 35.5013   4
   1   2 -17 25.4501 19.0750   9
  -1  -2  16 31.8371 24.8421   4
   1   2 -16 37.7581 31.4034   9
  -1  -2  15 1529.52 175.319   4
  -1  -2  14 1323.44 178.838   4
  -1  -2  13 52.7660 34.1205   4
  -1  -2  12 4946.36 362.651   4
  -1  -2  11 165.669 64.9740   4
   1   2 -11 209.015 157.615   2
  -1  -2  10-14.7215 21.0316   4
   1   2 -10-11.1833 116.440   2
   1   2  -9 1684.97 404.890   2
   1   2  -8 713.423 232.301   2
   1   2  -7 2011.07 363.569   2
   1   2  -6 10466.5 765.729   2
   1   2  -5 8758.35 562.113   2
   1   2  -4 1047.75 204.951   2
   1   2  -3 30894.2 977.671   1
   1   2  -2 53736.0 1152.70   1
   1   2  -1 343675. 2695.21   1
   1   2   0 33606.3 843.365   1
   1   2   1 102.512 46.9954   1
   1   2   2 25947.9 784.844   1
   1   2   3 255.379 83.6273   1
  -1  -2  -4 60.0793 61.7202   2
   1   2   4 54.7178 33.0550   1
  -1  -2  -5 1316.12 258.263   2
  -1  -2  -6 404.142 162.126   2
  -1  -2  -7 533.061 184.295   2
  -1  -2  -8 850.150 268.437   2
  -1  -2  -9-94.5521 115.598   2
  -1  -2 -10 141.733 117.669   2
   1   2  11 1271.13 338.889   1
  -1  -2 -11 998.680 388.455   2
   1   2  12 175.977 80.7797   4
   1   2  13 1399.00 212.280   4
   1   2  14 2314.68 257.772   4
   1   2  15 93.7445 49.1195   4
   1   2  16 76.7155 34.7270   4
   1   2  17 2.85277 2.60392   4
   1   3 -16 263.946 69.8367   9
  -1  -3  16 330.984 63.1040   4
   1   3 -15 264.516 79.8164   9
  -1  -3  15 277.796 75.2979   4
  -1  -3  14 181.161 62.1483   4
  -1  -3  13 294.495 87.4026   4
  -1  -3  12 9551.38 506.016   4
   1   3 -11 4747.85 759.189   2
  -1  -3  11 8164.84 455.378   4
   1   3 -10 4302.79 696.120   2
  -1  -3  10 6940.35 398.577   4
   1   3  -9 8025.56 896.589   2
   1   3  -8 732.650 244.907   2
   1   3  -7 20882.7 1232.17   2
   1   3  -6 2816.86 377.915   2
   1   3  -5 2386.14 347.796   2
   1   3  -4 985.107 199.476   1
   1   3  -3 72.8470 48.9925   1
   1   3  -2 19809.5 812.597   1
   1   3  -1 3116.45 311.359   1
   1   3   0 45369.5 1190.57   1
   1   3   1 6469.29 454.429   1
   1   3   2 8027.44 529.680   1
   1   3   3 9835.92 603.889   1
   1   3   4 8925.53 600.230   1
   1   3   5 1405.28 256.932   1
   1   3   6 1871.42 316.996   1
   1   3   7 2663.88 400.843   1
   1   3   8 226.371 127.017   1
   1   3   9 9.94450 88.5183   1
   1   3  10 155.025 66.5776   1
   1   3  11 92.5086 74.4477   1
   1   3  12 3212.21 330.484   4
   1   3  13 760.175 157.732   4
   1   3  14 320.119 96.6036   4
   1   3  15 579.396 105.447   4
   1   3  16 21.5294 21.0568   4
   1   4 -16 41.9740 13.3451   9
  -1  -4  15 225.644 62.2294   4
   1   4 -15 108.559 46.6565   9
  -1  -4  14 67.4718 41.8540   4
   1   4 -14 49.6901 48.7526   9
  -1  -4  13-42.3234 38.8227   4
   1   4 -13 8.40549 27.4181   9
  -1  -4  12 1099.32 169.893   4
  -1  -4  11 3718.91 311.369   4
   1   4 -10 963.901 333.701   2
  -1  -4  10 1049.37 159.364   4
  -1  -4   9 751.248 131.326   4
   1   4  -9 400.530 218.453   2
   1   4  -8 1641.99 393.897   2
   1   4  -7 3290.98 493.106   2
   1   4  -6 1659.49 320.950   2
   1   4  -5 27744.0 1272.54   1
   1   4  -5 28987.0 1397.19   2
   1   4  -4 8553.08 672.421   1
   1   4  -3 4700.56 464.751   1
   1   4  -2 12653.9 748.052   1
   1   4  -1 11479.8 689.777   1
   1   4   0 13981.0 759.482   1
   1   4   1 9480.82 635.214   1
   1   4   2 2752.98 357.311   1
   1   4   3 10247.8 723.053   1
   1   4   4 23.4192 29.1675   1
   1   4   5 41351.4 1533.05   1
   1   4   6-44.1799 46.0626   1
   1   4   7 3063.84 460.976   1
   1   4   8 461.649 164.595   1
   1   4   9-3.08515 30.5038   8
   1   4   9-15.7020 49.4224   1
  -1  -4  -9 65.7340 27.7574  12
   1   4  10-2.41657 73.1399   1
   1   4  10 55.6696 21.0011   8
  -1  -4 -10 96.6755 57.1498  12
  -1  -4 -11 733.339 123.624  12
   1   4  13 198.798 84.1228   4
   1   4  14 708.673 133.742   4
   1   4  15 133.748 45.4932   4
   1   4  16 162.371 42.4746   4
   1   5 -16 1202.98 119.866   9
   1   5 -15 51.9015 34.0746   9
  -1  -5  15 41.3059 9.33292   4
  -1  -5  14-2.91167 27.2738   4
   1   5 -14-0.73520 25.4497   9
   1   5 -13 102.127 53.2263   9
  -1  -5  13 145.792 60.9122   4
   1   5 -12 219.759 91.6460   9
  -1  -5  12 214.795 67.2189   4
  -1  -5  11 1710.73 220.490   4
   1   5 -11 1355.29 204.673   9
   1   5 -10 687.981 140.195   9
  -1  -5  10 785.635 146.320   4
   1   5 -10 310.404 168.334   2
   1   5  -9 7817.36 469.551   9
  -1  -5   9 7381.40 423.254   4
   1   5  -9 7213.28 883.026   2
   1   5  -8 17738.7 1338.82   2
   1   5  -8 20327.8 710.252   9
   1   5  -7 465.566 183.144   2
   1   5  -6 7015.63 747.082   2
   1   5  -5 1233.76 284.631   1
   1   5  -4 725.762 207.646   1
   1   5  -3 2640.78 391.163   1
   1   5  -2 199294. 3283.20   1
   1   5  -1 188750. 3153.78   1
   1   5   0 25106.1 1168.92   1
   1   5   1 3266.79 427.915   1
   1   5   2 4641.16 526.460   1
   1   5   3 6167.15 630.877   1
   1   5   4 17874.3 1132.58   1
   1   5   5 9014.92 805.542   1
   1   5   6 6162.98 688.767   1
   1   5   7 2480.02 449.910   1
   1   5   8 562.462 224.565   1
   1   5   8 181.449 64.1771   8
   1   5   9 1590.43 204.739   8
  -1  -5  -9 2355.29 225.211  12
   1   5   9 1945.90 439.941   1
   1   5  10 505.719 226.169   1
  -1  -5 -10 482.148 100.507  12
   1   5  10 281.814 80.7601   8
   1   5  11 31.5426 22.7927   8
  -1  -5 -11 70.1966 30.1705  12
  -1  -5 -12 954.396 144.935  12
   1   5  13 2888.60 294.277   4
   1   5  14 67.2612 38.1341   4
   1   5  15 657.290 103.024   4
   1   5  16 182.730 42.0397   4
   1   6 -15 1662.09 155.760   9
   1   6 -14 206.605 64.5477   9
  -1  -6  14 208.747 62.4910   4
   1   6 -13 106.138 52.7974   9
  -1  -6  13 125.087 44.5449   4
   1   6 -12 677.370 140.859   9
  -1  -6  12 748.143 149.592   4
  -1  -6  11 4538.17 372.114   4
   1   6 -11 3943.82 344.884   9
  -1  -6  10 4008.04 350.939   4
   1   6 -10 3854.67 337.341   9
  -1  -6   9 2945.93 293.239   4
   1   6  -9 2703.00 272.344   9
  -1  -6   8 16746.3 686.590   4
   1   6  -8 16083.9 1298.18   2
  -1  -6   7 1148.62 170.566   4
   1   6  -7 1301.88 167.961   9
   1   6  -6 356.271 189.320   2
   1   6  -5 4252.25 593.178   1
   1   6  -4 499.134 188.081   1
   1   6  -3 954.729 254.755   1
   1   6  -2 36500.2 1565.52   1
   1   6  -1 14106.0 984.622   1
   1   6   0 9808.06 821.997   1
   1   6   1 3062.76 458.798   1
   1   6   2 62.7778 64.1788   1
   1   6   3 604.545 206.718   1
   1   6   4 1034.88 271.926   1
   1   6   5 3457.65 554.494   1
   1   6   6 4776.20 663.596   1
   1   6   7 2437.76 486.398   1
   1   6   7 971.203 172.136   8
   1   6   8-31.3954 51.2651   8
   1   6   8 29.3953 83.6664   1
   1   6   9-143.100 123.820   1
   1   6   9-14.9518 32.6192   8
   1   6  10 1013.27 169.347   8
  -1  -6 -10 1383.49 185.531  12
   1   6  11 13.2821 17.3457   8
  -1  -6 -11 30.4073 10.8557  12
  -1  -6 -12 491.038 98.6964  12
   1   6  12 469.325 97.5139   8
   1   6  13 333.191 95.5743   4
   1   6  14 1199.55 155.852   4
   1   6  15 2087.47 165.649   4
  -1  -7  14 130.155 33.9397   4
   1   7 -14 274.745 65.0414   9
   1   7 -13 1149.12 156.645   9
  -1  -7  13 1109.56 142.955   4
   1   7 -12 11.6107 7.24600   9
  -1  -7  12 13.1862 30.9859   4
  -1  -7  11 41.3720 12.9596   4
   1   7 -11 52.3667 19.3674   9
   1   7 -10 985.416 172.064   9
  -1  -7  10 1006.54 171.230   4
  -1  -7   9 1170.31 184.012   4
   1   7  -9 1088.37 176.999   9
  -1  -7   8 4783.77 370.476   4
   1   7  -8 4699.94 361.101   9
  -1  -7   7 85.4735 34.1951   4
   1   7  -7 164.053 62.8233   9
   1   7  -6-4.54785 53.4584   9
  -1  -7   6-36.8219 34.4504   4
   1   7  -6-34.0065 126.296   2
   1   7  -5 141.029 124.476   1
  -1  -7   5 60.4215 36.1205   4
   1   7  -4 896.308 283.392   1
   1   7  -3 3130.13 518.943   1
   1   7  -2 2059.56 415.652   1
   1   7  -1 2801.03 492.237   1
   1   7   0 6947.85 741.553   1
   1   7   1 3245.08 525.886   1
   1   7   2 3578.03 562.700   1
   1   7   3 2091.66 429.800   1
   1   7   4 8135.98 880.383   1
  -1  -7  -5 925.756 133.878   6
   1   7   5 1247.48 345.129   1
  -1  -7  -6 1812.88 196.068   6
   1   7   6 2735.74 521.844   1
   1   7   7 287.870 157.676   1
   1   7   7 252.053 78.9162   8
   1   7   8 1820.30 245.484   8
   1   7   9 2949.93 294.517   8
   1   7  10 1834.95 225.255   8
  -1  -7 -10 2188.64 235.702  12
   1   7  11 1658.81 194.553   8
  -1  -7 -11 1750.62 200.799  12
  -1  -7 -12 2859.51 238.793  12
   1   7  12 2576.57 207.469   8
  -1  -7 -13 1214.53 132.720  12
   1   7  13 982.976 147.649   4
   1   7  14 657.683 101.490   4
   1   8 -13 1127.67 123.818   9
  -1  -8  13 1088.97 117.450   4
  -1  -8  12 531.971 102.342   4
   1   8 -12 543.414 101.647   9
  -1  -8  11 279.599 79.6902   4
   1   8 -11 245.891 73.8645   9
   1   8 -10 297.169 91.0032   9
  -1  -8  10 254.693 81.5464   4
   1   8  -9 1017.11 169.263   9
  -1  -8   9 955.319 160.203   4
   1   8  -8 59.7519 43.5820   9
  -1  -8   8 19.4109 27.1854   4
  -1  -8   7 6000.62 419.680   4
   1   8  -7 6077.00 407.073   9
   1   8  -6 423.733 165.733   2
  -1  -8   6 712.230 131.242   4
   1   8  -5 63.9647 137.524   1
  -1  -8   5 114.055 45.7281   4
   1   8  -5 260.196 178.896   2
  -1  -8   4 61.8313 29.9517   4
   1   8  -4 37.2309 103.934   1
  -1  -8   3 427.446 98.7886   4
   1   8  -3 351.148 134.925   1
  -1  -8   3 711.986 113.109   6
   1   8  -2 3498.49 581.202   1
  -1  -8   2 3101.23 242.368   6
  -1  -8   2 2633.19 263.585   4
  -1  -8   1 71.1896 16.4640   6
  -1  -8   1 91.9708 46.3672   4
   1   8   0 15166.7 1185.39   1
  -1  -8   0 7148.17 377.051   6
   1   8   1 2398.53 486.011   1
  -1  -8  -1 1301.76 155.858   6
   1   8   2 2193.10 229.716  10
  -1  -8  -2 2250.28 209.813   6
  -1  -8  -3 8.08464 17.6295   6
   1   8   3 164.685 113.543   1
   1   8   3 144.350 57.2565  10
   1   8   4 940.183 137.782  10
   1   8   4 497.999 226.394   1
  -1  -8  -4 640.792 122.377   6
   1   8   5-35.4813 47.9140  10
  -1  -8  -5 13.0957 13.6148   6
  -1  -8  -6 999.076 156.430   6
   1   8   6 588.230 201.294   1
   1   8   7 65.6292 65.1490   8
   1   8   8 103.057 71.9652   8
  -1  -8  -9 443.558 105.418  12
   1   8   9 298.907 88.2216   8
   1   8  10 566.993 124.746   8
  -1  -8 -10 766.318 131.817  12
   1   8  11 11.8998 15.0433   8
  -1  -8 -11-29.5813 31.0999  12
   1   8  12 15.9951 19.1634   8
  -1  -8 -12 42.0816 24.8485  12
   1   8  13 799.518 114.747   4
  -1  -8 -13 625.817 79.2624  12
   1   8  14 123.123 31.8141   4
  -1  -9  12 419.303 71.0561   4
  -1  -9  11 742.945 115.200   4
  -1  -9  10 246.609 70.1824   4
  -1  -9   9 2101.00 230.781   4
  -1  -9   8 135.945 60.2189   4
  -1  -9   7 2790.24 288.309   4
  -1  -9   6 1703.30 184.864   6
  -1  -9   6 1527.82 212.873   4
  -1  -9   5 5718.22 412.485   4
  -1  -9   5 5539.46 338.691   6
  -1  -9   4 494.794 103.284   6
  -1  -9   4 395.706 106.331   4
  -1  -9   3-29.4256 60.6734   4
  -1  -9   3 13.3446 32.5206   6
   1   9  -3 71.1129 56.0508   1
  -1  -9   2 142.039 46.2584   6
   1   9  -2 117.339 75.2825   1
  -1  -9   1 55.2517 13.2511   6
   1   9  -1-16.2820 40.3271   1
  -1  -9   0 4018.21 302.617   6
   1   9   0 4338.84 661.694   1
  -1  -9  -1 1854.32 198.793   6
   1   9   1 1969.67 450.894   1
   1   9   1 1734.83 214.583  10
   1   9   2 340.544 205.672   1
  -1  -9  -2 138.062 50.5690   6
   1   9   2 164.989 58.5601  10
  -1  -9  -3 1191.79 167.806   6
   1   9   3 1331.13 168.509  10
  -1  -9  -4 492.478 105.820   6
   1   9   4 428.028 85.0910  10
  -1  -9  -5 1.19523 10.5052   6
   1   9   5-7.69089 17.1182  10
  -1  -9  -6 519.445 116.718   6
   1   9   7 250.246 102.571   8
   1   9   8 93.0497 73.0773   8
  -1  -9  -9 546.030 117.531  12
   1   9   9 464.654 123.040   8
  -1  -9 -10 288.632 77.6357  12
   1   9  10 232.480 74.3786   8
   1   9  11 25.9118 20.5594   8
  -1  -9 -11 8.59991 19.2211  12
  -1  -9 -12 370.128 66.5412  12
   1   9  13 107.938 36.5753   4
  -1 -10  10 352.588 74.9946   4
  -1 -10   9 581.199 109.697   4
   1  10  -9 346.809 75.0296  10
  -1 -10   8 1936.47 214.158   4
  -1 -10   7 136.766 65.6624   4
  -1 -10   7 71.0999 28.2297   6
  -1 -10   6 14.4120 32.2693   4
  -1 -10   6 29.9667 32.6735   6
  -1 -10   5 3256.41 257.129   6
  -1 -10   5 3546.26 321.465   4
  -1 -10   4 2405.43 223.591   6
  -1 -10   3 673.702 110.980   6
  -1 -10   2 56.8806 35.0219   6
  -1 -10   1 371.991 96.9477   6
   1  10   0 213.295 76.8352  10
  -1 -10   0 308.888 80.6297   6
   1  10   1 372.786 92.3809  10
  -1 -10  -1 518.533 108.212   6
   1  10   2 4574.48 329.667  10
  -1 -10  -2 3525.05 295.071   6
   1  10   3 8600.42 421.842  10
  -1 -10  -3 8184.34 440.583   6
   1  10   4-39.5296 25.3260  10
  -1 -10  -4 60.8481 51.1467   6
   1  10   5 835.963 121.549  10
  -1 -10  -5 849.150 150.126   6
   1  10   6 117.780 44.8104   8
   1  10   7 839.776 147.931   8
   1  10   8 61.7454 37.3548   8
   1  10   9-45.9315 40.4979   8
  -1 -10  -9 20.1599 35.7111  12
  -1 -10 -10 51.2163 24.4421  12
   1  10  10 69.3912 34.9054   8
  -1 -10 -11 191.493 49.2134  12
   1  10  11 220.414 46.6663   8
   1  11  -8 160.851 41.8498  10
   1  11  -7 973.679 129.963  10
   1  11  -6 298.742 77.6154  10
  -1 -11   6 332.025 61.7999   6
  -1 -11   5-8.22170 20.1471   6
  -1 -11   4 4530.53 293.966   6
   1  11  -3 1404.83 190.173  10
  -1 -11   3 1574.10 177.643   6
  -1 -11   2 189.905 60.1777   6
   1  11  -2 208.723 67.7072  10
  -1 -11   1 24.8792 6.03056   6
   1  11  -1 93.7137 47.0792  10
   1  11   0-2.69738 16.3247  10
  -1 -11   0-46.8792 39.7294   6
   1  11   1 518.455 114.049  10
  -1 -11  -1 442.376 97.8797   6
  -1 -11  -2 16.0757 41.5818   6
   1  11   2 44.8560 25.8166  10
   1  11   3 31.2233 31.1313  10
  -1 -11  -3 22.6132 23.5715   6
   1  11   4 2815.05 218.151  10
  -1 -11  -4 2599.76 242.584   6
   1  11   5 1082.58 196.221   8
  -1 -11  -5 1346.50 171.704   6
   1  11   6 1712.24 207.033   8
   1  11   7 11.1342 14.5793   8
  -1 -11  -8 22.8459 30.2877  12
   1  11   8 6.97616 4.85482   8
   1  11   9 465.564 88.9491   8
  -1 -11  -9 473.950 80.9306  12
   1  11  10 185.711 43.4177   8
  -1 -11 -10 124.483 33.7844  12
   1  12  -8 31.5756 18.1019  10
   1  12  -7 347.642 63.8069  10
   1  12  -6 7.61742 19.6083  10
   1  12  -5 879.533 122.132  10
  -1 -12   5 1163.15 115.836   6
  -1 -12   4 449.491 76.0827   6
   1  12  -4 367.226 79.2408  10
  -1 -12   3 209.133 49.4427   6
   1  12  -3 175.346 54.4315  10
   1  12  -2 579.091 105.531  10
  -1 -12   2 529.957 98.4062   6
   1  12  -1 813.054 130.453  10
  -1 -12   1 1102.72 139.139   6
  -1 -12   0 2.87745 16.8769   6
   1  12   0-51.1079 43.4892  10
  -1 -12  -1 1680.22 183.054   6
   1  12   1 1398.55 162.532  10
   1  12   2 377.996 76.2279  10
  -1 -12  -2 491.142 97.9233   6
  -1 -12  -3 201.634 57.6709   6
   1  12   3 253.010 78.0930   8
   1  12   3 149.646 45.4873  10
   1  12   4 672.240 93.6443  10
   1  12   4 737.909 127.384   8
   1  12   5 4108.76 295.197   8
   1  12   6 2641.41 247.617   8
  -1 -12  -6 2322.41 194.613  12
   1  12   7 398.151 84.3421   8
  -1 -12  -7 327.711 66.1148  12
   1  12   8-6.01498 6.42131   8
  -1 -12  -8 39.9037 23.6580  12
   1  13  -6 1.70454 3.44852  10
   1  13  -5 177.655 42.1350  10
  -1 -13   4 20.6038 17.1020   6
   1  13  -4 42.0193 12.4191  10
  -1 -13   3 687.975 81.7302   6
   1  13  -3 604.577 84.5461  10
   1  13  -2-16.1240 12.4994  10
  -1 -13   2 19.7808 16.7757   6
   1  13  -1 746.406 97.8345  10
   1  13  -1 503.378 78.2333   8
  -1 -13   1 837.991 100.181   6
   1  13   0 545.821 82.4991  10
   1  13   0 435.762 78.8703   8
  -1 -13   0 689.692 95.2039   6
   1  13   1 18.9736 13.3012  10
   1  13   1 129.480 51.9011   8
  -1 -13  -1 128.677 42.4890   6
   1  13   2 118.505 31.8803  10
   1  13   2 35.8525 5.23672   8
  -1 -13  -2 95.3503 34.2097   6
   1  13   3 486.176 64.6705  10
   1  13   3 338.286 69.5726   8
   1  13   4 51.2742 28.9802   8
   1  13   5 642.944 92.7688   8
  -1 -13  -5 622.314 81.3699  12
  -1 -13  -6 712.585 79.3627  12
   1  13   6 949.522 100.380   8
  -2  14   4-44.4350 19.0701   8
   2 -14  -3-38.4682 19.7876   6
   2 -14  -2 59.0911 29.3190   6
   2 -14  -1 265.431 57.8689   6
  -2  14   0 173.392 35.6417  10
   2 -14   0 226.888 54.6363   6
  -2  14  -1 48.4681 22.8014  10
   2 -14   1 88.4078 34.1806   6
  -2  14  -2 223.681 46.6508  10
   2 -14   2 291.309 56.4583   6
   2 -14   3 52.1488 26.2610   6
  -2  14  -3 51.9568 17.2752  10
  -2  14  -4 35.6302 18.4090  10
   2 -14   4 55.7662 20.1988   6
   2 -14   5-2.20442 2.68628   6
  -2  14  -5 27.4207 15.0443  10
  -2  13   7 40.0905 16.2370   8
   2 -13  -7 26.5533 1.49623  12
  -2  13   6 240.007 57.2333   8
   2 -13  -6 381.222 66.1958  12
   2 -13  -5 6.28375 20.3311  12
   2 -13  -4 42.2178 34.5466   6
   2 -13  -4 57.9096 22.9696  12
   2 -13  -3 374.736 84.6365   6
   2 -13  -2-16.2652 20.0611   6
   2 -13  -1 264.440 71.9776   6
  -2  13   1 215.566 52.5339  10
  -2  13   0-1.85575 10.5990  10
   2 -13   0-26.5555 21.1237   6
   2 -13   1-29.2845 22.5585   6
  -2  13  -1-19.3132 37.8551  10
   2 -13   2 145.840 50.5517   6
   2 -13   3 598.561 102.095   6
   2 -13   4 104.023 41.9840   6
   2 -13   5 51.3039 26.2206   6
   2 -13   6 123.525 42.9773   6
   2 -13   7 7.73646 3.02324   6
   2 -12  -9 10.7610 6.87883  12
   2 -12  -8 244.979 59.4023  12
  -2  12   8 184.598 59.3329   8
  -2  12   7 152.602 58.3839   8
   2 -12  -7 223.460 61.0032  12
   2 -12  -6 63.4963 29.4909  12
   2 -12  -5 521.838 103.276   6
   2 -12  -5 416.734 87.5969  12
   2 -12  -4 648.556 126.413   6
   2 -12  -4 590.176 105.215  12
   2 -12  -3 57.9951 32.4043  12
   2 -12  -3 50.7542 28.4950   6
   2 -12  -2 229.345 70.6985   6
  -2  12   2 146.000 36.1563  10
   2 -12  -1-13.3261 31.0215   6
  -2  12   1-25.7981 35.9904  10
   2 -12   0 675.519 127.287   6
   2 -12   1 51.9345 47.3204   6
   2 -12   2 161.507 57.6328   6
   2 -12   3 444.546 100.691   6
   2 -12   4 42.6930 10.6585   6
   2 -12   5 3.60838 30.2848   6
   2 -12   6 88.9551 35.2904   6
   2 -12   7 19.7210 21.5997   6
   2 -12   8 60.0057 39.1471   6
   2 -12   9 96.8813 30.9478   6
   2 -11 -11 63.3133 33.7026  12
   2 -11 -10 9.51361 22.9064  12
   2 -11  -9 127.418 48.9125  12
  -2  11   9 91.8280 37.9656   8
  -2  11   8 19.8811 29.3667   8
   2 -11  -8 91.5819 40.2243  12
   2 -11  -7 107.724 48.0398  12
   2 -11  -6-29.8924 30.7780   6
   2 -11  -6-14.5781 26.1919  12
   2 -11  -5 69.3417 37.8947  12
   2 -11  -5-32.3420 22.8407  11
   2 -11  -5 28.6403 25.5843   6
   2 -11  -4 1759.56 204.003   6
   2 -11  -4 1642.89 241.278  11
   2 -11  -3 230.285 80.0858   6
   2 -11  -3 315.405 81.1706  11
   2 -11  -2 49.4806 44.0849   6
  -2  11   2-14.5440 31.6561  10
   2 -11  -1 0.12749 28.5367   6
   2 -11   0 1323.62 181.675   6
   2 -11   1 1884.61 223.639   6
   2 -11   2 2511.24 258.641   6
   2 -11   3 3641.28 309.965   6
   2 -11   4 11125.5 545.490   6
   2 -11   4 11062.0 607.808   4
   2 -11   5 2492.09 282.418   4
   2 -11   6 7307.41 480.402   4
   2 -11   7 1617.27 214.891   4
   2 -11   8 743.755 136.321   4
   2 -11   9 242.556 65.2751   4
   2 -11  10 164.072 53.1925   4
   2 -11  10 179.798 52.2072   6
   2 -11  11 24.6531 4.26187   4
  -2  10  12 46.5933 15.0148   4
   2 -10 -12 136.059 41.2304  12
   2 -10 -11 57.7675 32.8589  12
   2 -10 -10 332.361 86.3445  12
   2 -10  -9 1579.66 196.667  12
  -2  10   9 1175.29 150.723   8
  -2  10   8 911.280 165.474   8
   2 -10  -8 1200.04 173.509  12
   2 -10  -7 255.951 86.3920  12
   2 -10  -6 526.875 113.680  12
   2 -10  -6 566.799 166.001  11
   2 -10  -6 423.881 115.686   6
   2 -10  -5 916.383 184.226  11
   2 -10  -5 943.698 148.198   6
   2 -10  -4 1741.11 199.254   6
   2 -10  -4 1546.06 219.189  11
   2 -10  -3 8690.58 502.830  11
   2 -10  -3 9601.87 481.080   6
  -2  10   2 1315.68 305.196   1
   2 -10  -2 1409.09 191.218   6
   2 -10  -2 1307.66 180.018  11
   2 -10  -1 247.375 63.8940  11
  -2  10   1 153.290 100.205   1
   2 -10  -1 213.959 79.7181   6
  -2  10   0 99.9966 97.4067   1
   2 -10   0 61.0882 29.6677   6
   2 -10   1 98.3235 32.2717   6
   2 -10   2 11.8673 28.0359   4
   2 -10   2-56.4645 50.2599   6
   2 -10   3 1070.88 187.347   4
   2 -10   4 315.449 96.0075   4
   2 -10   5 2772.92 303.817   4
   2 -10   6 889.242 167.543   4
   2 -10   7 3674.94 348.737   4
   2 -10   8 258.488 87.1081   4
   2 -10   9 62.9790 37.3650   4
   2 -10  10 0.25245 12.4916   4
   2 -10  11 127.738 51.7191   4
   2 -10  12 368.866 76.1537   4
  -2   9  13 18.7880 7.39628   4
   2  -9 -13 10.7448 12.8345  12
   2  -9 -12 131.912 45.1292  12
   2  -9 -11 29.9838 23.1609  12
   2  -9 -10 551.313 117.990  12
   2  -9  -9 1753.52 217.433  12
   2  -9  -8 180.650 72.3336  12
  -2   9   8-2.62958 49.4457   8
   2  -9  -7 565.464 123.221  12
   2  -9  -7 652.969 173.022  11
   2  -9  -7 589.220 111.934   6
   2  -9  -6 104.541 66.2674  11
   2  -9  -6 216.985 69.5816   6
  -2   9   5 148.466 237.430   1
   2  -9  -5-2.42697 25.3741   6
   2  -9  -5 121.350 62.4519  11
   2  -9  -4 2134.81 230.521   6
   2  -9  -4 2653.83 292.985  11
   2  -9  -3 933.896 154.756  11
   2  -9  -3 877.938 146.325   6
  -2   9   3 691.730 248.671   1
   2  -9  -2-27.4572 26.2114  11
  -2   9   2 62.3458 83.2008   1
   2  -9  -2-21.1570 21.8297   6
   2  -9  -1-22.4217 41.4333   6
  -2   9   1 31.1929 99.3871   1
   2  -9  -1 14.0735 36.2559  11
   2  -9   0 3113.88 271.637  11
  -2   9   0 3332.32 505.928   1
  -2   9  -1 1973.68 432.231   1
   2  -9   1 1312.89 188.133   4
   2  -9   1 2018.60 209.719  11
  -2   9  -2 348.197 207.691   1
   2  -9   2 215.566 80.7073   4
   2  -9   3 405.755 104.341   4
   2  -9   4 2609.62 281.505   4
   2  -9   5 2706.30 295.988   4
   2  -9   6 3064.16 320.679   4
   2  -9   7 8114.58 527.791   4
   2  -9   8 8964.86 558.883   4
   2  -9   9 940.541 177.968   4
   2  -9  10-28.5812 20.0077   4
   2  -9  11 234.651 82.4650   4
   2  -9  12 259.673 71.8368   4
   2  -9  13 276.230 66.1698   4
   2  -8 -14 77.1234 32.5788  12
   2  -8 -13 37.1794 21.2527  12
  -2   8  13-1.70062 16.6338   4
   2  -8 -12 43.7880 42.1199  12
   2  -8 -11 10.6151 37.5845  12
   2  -8 -10 482.183 119.919  12
   2  -8  -9 265.528 86.6774  12
   2  -8  -8 306.790 88.8388  12
   2  -8  -7 2750.95 240.238   6
   2  -8  -7 2850.29 273.246  12
   2  -8  -7 2040.47 257.465  11
   2  -8  -6 106.851 43.9905  11
   2  -8  -6 51.7889 34.0540   6
  -2   8   5 380.586 187.933   1
   2  -8  -5 289.779 99.8392  11
   2  -8  -5 518.867 98.3821   6
  -2   8   4 752.630 274.577   1
   2  -8  -4 786.540 122.925   6
   2  -8  -4 343.312 108.445  11
  -2   8   3 2468.37 474.915   1
  -2   8   2 125.214 136.868   1
  -2   8   1 455.155 206.704   1
  -2   8   0 1859.40 409.641   1
  -2   8  -1 3991.17 505.956   1
  -2   8  -2 9087.27 776.364   1
  -2   8  -3 266.529 141.691   1
   2  -8   3 182.041 56.7010   4
   2  -8   4 3898.77 325.600   4
   2  -8   5 650.346 141.471   4
   2  -8   6 5684.72 420.660   4
   2  -8   7 23194.0 882.441   4
   2  -8   8 1616.01 238.951   4
   2  -8   9 5722.46 446.596   4
   2  -8  10 1656.12 235.038   4
   2  -8  11 78.6521 49.9388   4
   2  -8  12 913.115 159.549   4
   2  -8  13 128.633 44.9971   4
   2  -8  14 683.478 101.527   4
  -2   7  14 194.069 53.6901   4
   2  -7 -14 223.561 60.2350  12
   2  -7 -13 135.151 50.6022  12
  -2   7  13 212.625 62.7120   4
   2  -7 -12 257.245 88.8517  12
   2  -7 -11 481.371 118.664  12
   2  -7 -10 15.2667 33.5894  12
   2  -7  -9 365.087 99.6866  12
  -2   7   8-40.9825 66.1313   1
   2  -7  -8 39.6848 26.8180  12
   2  -7  -8 99.1282 73.5020  11
   2  -7  -7 327.187 88.3297  12
  -2   7   7 487.190 239.261   1
   2  -7  -7 294.653 102.184  11
   2  -7  -7 416.453 85.2272   6
   2  -7  -6 141.106 39.4866   6
   2  -7  -6 86.5203 46.9276  11
  -2   7   6 44.6061 93.8936   1
  -2   7   5 1477.11 381.823   1
  -2   7   4-43.3445 60.1806   1
  -2   7   3 1526.67 324.301   1
  -2   7   2 1970.43 363.607   1
  -2   7   1 1630.29 332.607   1
  -2   7   0 2770.04 420.834   1
  -2   7  -1 443.577 148.522   1
  -2   7  -2 3324.76 437.769   1
  -2   7  -3 1466.75 292.573   1
  -2   7  -4 41.6451 76.1261   2
  -2   7  -4 89.8164 54.5178   1
  -2   7  -5 392.116 156.877   1
  -2   7  -5 176.849 64.1759   2
   2  -7   6 263.432 87.1584   4
  -2   7  -6 459.652 182.789   2
   2  -7   7 1130.34 184.579   4
   2  -7   8 3725.34 350.023   4
   2  -7   9 1688.30 240.572   4
   2  -7  10 1005.32 186.651   4
   2  -7  11 570.789 145.255   4
   2  -7  12 822.692 161.868   4
   2  -7  13 561.849 121.033   4
   2  -7  14 1.22351 21.5721   4
   2  -7  15-4.00452 13.4509   4
   2  -6 -15 66.3359 31.4421  12
  -2   6  14 200.842 60.0617   4
   2  -6 -14 183.149 52.7069  12
   2  -6 -13 239.334 75.0378  12
  -2   6  13 186.149 68.6049   4
   2  -6 -12 177.556 68.8427  12
   2  -6 -11-10.7817 37.8898  12
   2  -6 -10 221.683 79.9976  12
   2  -6  -9-7.35977 34.6161  12
  -2   6   9-13.1771 48.7056   1
   2  -6  -8 156.964 81.9441  11
   2  -6  -8 60.9890 51.0372  12
  -2   6   8-18.0899 88.8647   1
   2  -6  -7 2821.82 258.120  11
   2  -6  -7 2834.46 244.625  12
  -2   6   7 2901.60 508.929   1
  -2   6   6 433.095 190.882   1
  -2   6   5 229.306 132.497   1
  -2   6   4 1671.89 340.092   1
  -2   6   3 5290.31 588.864   1
  -2   6   2 149.078 92.6341   1
  -2   6   1 13658.5 846.115   1
  -2   6   0 8706.74 651.380   1
  -2   6  -1 12149.8 767.664   1
  -2   6  -2 74.2239 67.7779   1
  -2   6  -3 4864.22 506.815   1
  -2   6  -4 6029.05 558.786   1
  -2   6  -4 5974.93 556.032   2
  -2   6  -5-25.1526 36.0189   2
  -2   6  -6 134.811 92.0157   2
   2  -6   7 1585.49 191.252   4
  -2   6  -7 2660.32 420.908   2
   2  -6   8 4481.00 342.426   4
  -2   6  -8 6691.97 724.834   2
   2  -6   9 184.126 76.1808   4
   2  -6  10 18.3848 33.9119   4
   2  -6  11 334.878 113.405   4
  -2   6 -12 18.9381 14.5916   9
   2  -6  12 10.7692 31.8529   4
  -2   6 -13 765.713 125.203   9
   2  -6  13 887.483 163.841   4
  -2   6 -14 27.0719 25.1937   9
   2  -6  14 25.9058 11.5192   4
   2  -6  15 131.511 46.3875   4
   2  -5 -15 38.7223 17.6123  12
  -2   5  15 2.08611 18.1966   4
   2  -5 -14 11.7215 19.9245  12
  -2   5  14 4.19237 19.7442   4
  -2   5  13 542.478 119.028   4
   2  -5 -13 481.546 110.492  12
   2  -5 -12 753.531 147.324  12
   2  -5 -11 175.974 72.5077  12
   2  -5 -10 1129.70 170.518  12
  -2   5  10 756.138 213.485   1
  -2   5   9 654.040 272.640   1
   2  -5  -9 977.238 155.623  12
   2  -5  -8-5.86821 21.0610  11
  -2   5   8 139.574 91.9001   1
   2  -5  -8 93.3998 43.4758  12
  -2   5   7 1523.57 346.145   1
  -2   5   6 6742.77 690.858   1
  -2   5   5 289.838 123.836   1
  -2   5   4 28050.3 1249.40   1
  -2   5   3 15249.6 867.285   1
  -2   5   2 13490.7 788.961   1
  -2   5   1 30305.5 1157.32   1
  -2   5   0 4738.50 432.726   1
   2  -5   1 525.190 174.660   3
  -2   5  -1 583.602 134.980   1
   2  -5   2 212.371 95.1834   3
  -2   5  -2 290.455 93.9710   1
  -2   5  -3 1.89472 42.9463   1
  -2   5  -4 125.172 64.6831   2
  -2   5  -4 78.3663 14.3524   1
  -2   5  -5 291.766 115.091   2
  -2   5  -6 13967.1 860.355   2
  -2   5  -7 6445.13 641.591   2
  -2   5  -8 148.867 136.118   2
   2  -5   8 26.3019 7.25620   4
  -2   5  -9 1159.76 303.337   2
   2  -5   9 613.003 126.781   4
   2  -5  10 2001.36 241.109   4
   2  -5  11 844.566 159.668   4
   2  -5  12 2894.94 300.748   4
   2  -5  13 545.971 126.573   4
   2  -5  14 50.5124 37.2038   4
  -2   5 -14 93.6244 41.6020   9
   2  -5  15 252.478 77.0996   4
  -2   5 -15 203.699 57.3146   9
   2  -5  16 30.4595 25.0530   4
   2  -4 -15-21.5116 20.5954  12
  -2   4  15 6.95135 22.6760   4
   2  -4 -14 315.947 84.1792  12
  -2   4  14 340.880 83.4781   4
  -2   4  13-19.6211 38.3229   4
   2  -4 -13 41.9738 30.0623  12
   2  -4 -12 2429.57 266.080  12
  -2   4  12 2294.64 257.282   4
   2  -4 -11 1853.70 230.400  12
   2  -4 -10 10.6122 13.4983  12
   2  -4 -10-61.0066 205.273   2
   2  -4  -9 32.5633 24.8245  12
   2  -4  -9 31.0923 101.783   2
   2  -4  -8 3.54067 90.5960   2
   2  -4  -7 2392.66 455.385   2
   2  -4  -6 11825.2 942.945   2
   2  -4  -5 1546.89 304.993   2
  -2   4   3 9187.18 612.851   1
   2  -4  -2 24499.6 1074.71   3
  -2   4   2 28807.7 987.616   1
   2  -4  -1 3406.34 386.794   3
  -2   4   1 3710.22 348.185   1
   2  -4   0 3379.09 382.767   3
  -2   4   0 3696.64 325.187   1
  -2   4  -1 6575.59 407.983   1
   2  -4   1 6151.87 505.042   3
  -2   4  -2 11676.1 521.989   1
   2  -4   2 10912.3 674.044   3
  -2   4  -3 14361.8 648.458   2
   2  -4   3 15488.5 775.720   3
  -2   4  -3 14401.5 632.601   1
  -2   4  -4 1763.61 220.975   2
   2  -4   4 2114.97 282.691   3
   2  -4   5 45985.3 1238.71   3
  -2   4  -5 45849.9 1360.08   2
  -2   4  -6 4711.14 480.748   2
  -2   4  -7 5109.14 553.691   2
  -2   4  -8 1105.37 278.709   2
   2  -4   9 598.416 119.625   4
  -2   4  -9 1053.26 300.139   2
  -2   4 -10 3948.38 602.829   2
   2  -4  10 4110.18 334.705   4
   2  -4  11 2710.98 284.977   4
   2  -4  12 258.446 88.4857   4
   2  -4  13 9.44304 28.0431   4
   2  -4  14 61.8306 42.1903   4
   2  -4  15 48.0208 35.3862   4
   2  -4  16 437.640 85.8594   4
  -2   4 -16 414.164 70.0588   9
  -2   3  15 37.1809 28.9226   4
   2  -3 -14-23.0041 14.2868  12
  -2   3  14 33.9233 37.7882   4
  -2   3  13 41.7413 20.4785   4
   2  -3 -13 76.6153 35.3632  12
  -2   3  12 1181.98 184.233   4
   2  -3 -12 1246.85 185.986  12
   2  -3 -11 103.753 46.9253  12
  -2   3  11 87.5243 46.3413   4
   2  -3 -10 471.289 217.458   2
   2  -3 -10 468.524 103.708  12
   2  -3  -9 367.676 229.356   2
   2  -3  -8 521.574 226.481   2
   2  -3  -7 1367.50 322.917   2
   2  -3  -6 1139.21 273.640   2
   2  -3  -5 14759.1 900.476   2
   2  -3  -4 435.225 131.519   2
   2  -3  -3 17685.9 773.285   2
   2  -3  -3 19966.8 879.220   3
   2  -3  -2 749985. 5208.52   3
  -2   3   1 239386. 2239.76   1
  -2   3   0 12211.5 492.440   1
   2  -3   1 77245.5 1587.63   3
  -2   3  -1 79323.6 1109.28   1
  -2   3  -2 25921.6 618.521   1
  -2   3  -2 26048.9 690.834   2
  -2   3  -3 18731.8 598.863   1
  -2   3  -3 16741.5 560.237   2
  -2   3  -4 11405.4 564.506   2
   2  -3   4 12339.9 602.890   3
  -2   3  -5 23993.7 942.877   2
   2  -3   5 23978.5 831.418   3
  -2   3  -6 13901.3 813.701   2
  -2   3  -7 1530.62 301.994   2
  -2   3  -8 138.248 64.9222   2
   2  -3   9 35.5120 15.8814   4
  -2   3  -9 23.0220 46.8963   2
  -2   3 -10 1914.77 434.776   2
   2  -3  10 994.139 162.252   4
   2  -3  11 320.136 88.9093   4
  -2   3 -11 554.693 215.786   2
   2  -3  12-47.1382 44.3535   4
   2  -3  13 129.724 51.9944   4
   2  -3  14 241.447 74.8238   4
   2  -3  15-6.09455 27.1109   4
   2  -3  16 363.128 76.6841   4
   2  -2 -16 162.490 46.4016   9
  -2   2  15 236.687 66.0573   4
  -2   2  14 196.036 65.7959   4
   2  -2 -14 169.568 59.7147  12
  -2   2  13 213.364 64.2834   4
   2  -2 -13 232.075 76.1140  12
   2  -2 -12 302.161 104.862  12
  -2   2  12 257.923 81.3528   4
  -2   2  11 817.504 141.670   4
   2  -2 -11 819.706 145.434  12
   2  -2 -10 411.349 99.5000  12
   2  -2 -10 642.592 289.556   2
  -2   2  10 636.401 117.180   4
   2  -2  -9 3746.25 638.051   2
   2  -2  -8 11394.4 1056.30   2
   2  -2  -7 4389.21 592.623   2
   2  -2  -6 1061.32 259.908   2
   2  -2  -5 5584.92 538.044   2
   2  -2  -4 3308.19 361.638   2
   2  -2  -4 2795.21 292.908   3
   2  -2  -3 110103. 1851.56   2
   2  -2  -3 111262. 1775.66   3
   2  -2  -2 999999. 5110.05   3
   2  -2  -2 903135. 4442.91   2
  -2   2   0 20148.2 445.875   1
  -2   2  -1 4613.99 149.147   2
  -2   2  -1 5148.83 176.093   1
  -2   2  -2 2092.65 158.009   2
   2  -2   2 2128.46 217.461   3
  -2   2  -3 755.089 118.082   2
   2  -2   3 694.698 123.655   3
  -2   2  -4 8.87401 35.0318   2
   2  -2   4-9.23738 28.4566   3
   2  -2   5 25357.3 752.549   3
  -2   2  -5 26583.6 991.036   2
  -2   2  -6 5042.80 483.339   2
  -2   2  -7 1667.60 309.104   2
  -2   2  -8 3191.26 473.083   2
  -2   2  -9 1794.36 402.814   2
   2  -2  10 30.2611 37.6536   4
  -2   2 -10 111.053 84.2886   2
  -2   2 -11 19.9013 163.407   2
   2  -2  11 6.77985 42.5602   4
   2  -2  12 35.1589 11.1518   4
   2  -2  13 192.164 73.2175   4
   2  -2  14 320.166 101.968   4
   2  -2  15 32.6447 36.2772   4
   2  -2  16 1.76503 9.56436   4
   2  -2  17 23.2210 15.5956   4
   2  -1 -16-0.86330 18.0271   9
  -2   1  15 580.869 97.9003   4
  -2   1  14 142.968 48.1760   4
  -2   1  13 59.4537 46.2807   4
   2  -1 -13 2.30589 20.3563  12
  -2   1  12 825.446 141.569   4
   2  -1 -12 793.532 142.221  12
   2  -1 -11 930.209 153.573  12
   2  -1 -11 752.263 351.256   2
  -2   1  11 890.132 147.358   4
  -2   1  10 1721.27 184.212   4
   2  -1 -10 1487.97 420.026   2
   2  -1 -10 1842.05 205.674  12
   2  -1  -9 316.555 192.983   2
   2  -1  -8 67.7862 91.3770   2
   2  -1  -7-37.0274 71.5840   2
   2  -1  -6 1376.97 273.666   2
   2  -1  -5 5874.84 509.985   2
   2  -1  -4 1918.93 201.949   3
   2  -1  -4 2018.68 262.896   2
   2  -1  -3 7347.57 386.463   3
   2  -1  -3 7664.24 433.613   2
   2  -1  -2 57073.3 963.820   2
   2  -1  -2 57830.5 1017.31   3
   2  -1  -1 246.684 43.9322   2
   2  -1   2 198009. 1882.91   3
  -2   1  -2 195167. 1676.09   2
   2  -1   3 34099.6 813.937   3
  -2   1  -3 37123.5 890.626   2
   2  -1   4 1433.15 166.973   3
  -2   1  -4 1606.83 218.584   2
  -2   1  -5 17440.8 819.994   2
   2  -1   5 15559.8 575.087   3
   2  -1   6 5659.36 358.647   3
  -2   1  -6 5394.37 523.162   2
  -2   1  -7 30569.1 1411.92   2
  -2   1  -8 8196.84 815.279   2
  -2   1  -9 3521.91 589.881   2
  -2   1 -10 3785.42 632.358   2
   2  -1  10 2202.67 231.790   4
  -2   1 -11 1280.90 367.652   2
   2  -1  11 1425.46 197.203   4
   2  -1  12 322.350 92.9039   4
   2  -1  13 22.4001 41.0715   4
   2  -1  14 447.122 111.798   4
   2  -1  15 820.235 139.795   4
   2  -1  16 70.1589 44.8592   4
   2  -1  17 14.0115 16.2854   4
   2   0 -16 356.907 79.6634   9
  -2   0  15 448.442 83.6008   4
  -2   0  14 39.3450 9.66736   4
  -2   0  13 2537.09 247.577   4
  -2   0  12 80.5274 48.7354   4
   2   0 -12 110.906 63.2650  12
  -2   0  11 666.291 123.981   4
   2   0 -11 472.111 228.508   2
   2   0 -11 748.595 145.197  12
  -2   0  10 490.300 85.3002   4
   2   0 -10 643.985 117.332  12
   2   0 -10 492.363 227.595   2
   2   0  -9 428.878 186.969   2
   2   0  -8 2702.83 469.910   2
   2   0  -7-9.99677 78.3607   2
   2   0  -6 13694.9 863.422   2
   2   0  -5 1041.65 108.070   3
   2   0  -5 1301.42 238.922   2
   2   0  -4 4259.77 247.379   3
   2   0  -4 4455.35 379.412   2
   2   0  -3 12693.8 543.847   2
   2   0  -3 15330.5 486.518   3
   2   0  -2 173720. 1814.60   2
   2   0  -2 179809. 1581.77   3
   2   0  -1 72982.2 1101.29   3
   2   0   0 332021. 1757.78   1
   2   0   1 86380.7 821.188   1
   2   0   2 13774.0 371.890   1
  -2   0  -2 14233.7 522.578   2
  -2   0  -3 34550.5 952.456   2
  -2   0  -4 294.262 102.289   2
  -2   0  -5 2833.17 363.072   2
   2   0   6 13347.0 596.544   3
  -2   0  -6 16128.5 969.739   2
  -2   0  -7 6862.54 692.079   2
  -2   0  -8 3859.38 559.651   2
  -2   0  -9 287.132 143.074   2
  -2   0 -10 73.3209 49.8642   2
   2   0  10 46.4204 34.5157   4
  -2   0 -11 321.021 159.749   2
   2   0  11 684.131 143.539   4
   2   0  12 605.614 131.082   4
   2   0  13 502.616 118.086   4
   2   0  14 308.715 90.8293   4
   2   0  15 144.741 58.1219   4
   2   0  16 143.002 46.2517   4
   2   0  17-26.0332 28.0996   4
   2   1 -17 134.580 38.4911   9
   2   1 -16 36.6735 25.4307   9
  -2  -1  15 120.067 40.8881   4
   2   1 -15 170.764 68.1642   9
  -2  -1  14 2574.20 231.092   4
  -2  -1  13 387.127 89.9967   4
  -2  -1  12 1219.59 173.064   4
   2   1 -11 160.226 162.034   2
  -2  -1  11 335.931 81.1670   4
   2   1 -11 386.517 96.3384  12
  -2  -1  10 2985.79 234.512   4
   2   1 -10 2886.85 566.009   2
   2   1 -10 3054.78 258.571  12
   2   1  -9 248.163 137.121   2
   2   1  -8 530.957 210.967   2
   2   1  -7 862.860 243.407   2
   2   1  -6 244.838 99.0848   2
   2   1  -5 2697.36 340.969   2
   2   1  -4 7022.96 297.261   3
   2   1  -4 5477.54 417.642   2
   2   1  -3 69.9905 38.3147   3
   2   1  -3-9.06216 39.0938   2
   2   1  -2 2290.09 246.898   1
   2   1  -1 1937.86 195.940   1
   2   1   0 214903. 1897.45   1
   2   1   1 10026.8 419.599   1
   2   1   2 22020.6 658.806   1
   2   1   3 62187.5 1165.48   1
  -2  -1  -4 279.681 98.5500   2
   2   1   4 338.981 96.2663   1
  -2  -1  -5 1059.55 220.734   2
  -2  -1  -6 8.98279 46.8038   2
  -2  -1  -7 656.691 202.223   2
  -2  -1  -8 1329.39 328.529   2
  -2  -1  -9 36.6372 108.154   2
   2   1  10 24.7453 22.5828   4
   2   1  10 30.9365 22.1242   8
   2   1  11 10822.1 572.015   4
  -2  -1 -11 6410.46 879.597   2
   2   1  12 4718.48 389.089   4
   2   1  13 374.846 110.323   4
   2   1  14 45.9120 26.4737   4
   2   1  15 21.2011 24.6679   4
   2   1  16 75.0159 40.9405   4
   2   1  17 0.15857 11.4857   4
   2   2 -16 262.757 65.7940   9
   2   2 -15 75.3237 35.8527   9
  -2  -2  14 288.162 76.4722   4
   2   2 -14 261.615 93.7112   9
  -2  -2  13-6.72573 14.8843   4
  -2  -2  12 5998.29 374.124   4
  -2  -2  11 157.864 69.9055   4
   2   2 -11 81.0071 72.2589   2
   2   2 -10 9205.17 1023.54   2
  -2  -2  10 9524.44 440.265   4
   2   2 -10 9579.03 465.078  12
   2   2  -9 3695.34 611.912   2
   2   2  -8 2723.33 477.313   2
   2   2  -7 4050.27 527.442   2
   2   2  -6 1171.08 256.790   2
   2   2  -5 3117.27 374.874   2
   2   2  -4 16927.7 892.727   2
   2   2  -3 26.9476 22.3415   1
   2   2  -2 36332.9 1061.50   1
   2   2  -1 128437. 1883.06   1
   2   2   0 74757.7 1416.36   1
   2   2   1 166222. 2082.98   1
   2   2   2 1176.09 187.125   1
   2   2   3 6205.44 443.302   1
   2   2   4 1922.66 250.555   1
   2   2   5 151.277 77.0319   1
   2   2   6 5.00134 33.1171   1
   2   2   7 1943.40 317.610   1
  -2  -2  -7 1861.83 381.910   2
  -2  -2  -8 2754.43 509.594   2
   2   2   8 2834.62 416.091   1
   2   2   9 2996.67 460.915   1
   2   2  10 3697.89 279.816   8
   2   2  10 2817.41 439.546   1
   2   2  11 206.058 83.4544   8
   2   2  12 2612.58 292.395   4
   2   2  13 661.217 144.460   4
   2   2  14 202.776 75.6470   4
   2   2  15 356.902 84.8452   4
   2   2  16 12.7507 18.8528   4
   2   3 -16 110.485 43.4090   9
   2   3 -15 18.0030 3.89787   9
  -2  -3  14 190.112 56.6276   4
   2   3 -14 162.553 68.5616   9
  -2  -3  13 2498.01 231.617   4
   2   3 -13 2700.23 295.160   9
  -2  -3  12 3051.59 267.945   4
  -2  -3  11 17429.3 635.711   4
  -2  -3  10 6821.85 381.124   4
   2   3 -10 4356.67 718.594   2
   2   3  -9 1216.02 341.280   2
   2   3  -8 3110.70 524.450   2
   2   3  -7 6846.16 726.584   2
   2   3  -6 7887.89 663.353   2
   2   3  -5 26509.7 1295.14   2
   2   3  -4 94074.4 2218.58   1
   2   3  -3 2806.50 356.065   1
   2   3  -2 1548.61 249.967   1
   2   3  -1 631.358 146.777   1
   2   3   0 81575.6 1736.25   1
   2   3   1 16253.5 764.289   1
   2   3   2 12754.2 700.095   1
   2   3   3 44636.3 1399.58   1
   2   3   4 11321.9 714.028   1
   2   3   5 365.802 131.589   1
   2   3   6 5887.48 557.481   1
   2   3   7 49.9913 35.4164   1
   2   3   8 374.819 181.244   1
   2   3   9 143.253 52.7817   8
   2   3   9 247.863 148.316   1
   2   3  10 2210.08 227.744   8
   2   3  10 1657.66 345.986   1
   2   3  11 977.342 146.089   8
   2   3  12 7325.68 417.822   8
   2   3  12 7026.95 486.834   4
   2   3  13 2372.42 269.539   4
   2   3  14 128.893 62.9426   4
   2   3  15 171.630 56.0450   4
   2   3  16 40.8645 29.2477   4
   2   4 -16 135.846 43.1006   9
   2   4 -15 101.965 48.8196   9
   2   4 -14 274.044 83.5435   9
   2   4 -13 278.454 94.1633   9
  -2  -4  13 336.901 89.4349   4
  -2  -4  12 2090.95 226.393   4
   2   4 -12 1827.21 239.555   9
   2   4 -11 27447.7 928.925   9
  -2  -4  11 27095.9 799.058   4
   2   4 -10 3200.76 312.917   9
   2   4 -10 3159.36 610.494   2
   2   4  -9 7531.61 462.204   9
   2   4  -9 7102.73 879.962   2
   2   4  -8 531.762 116.425   9
   2   4  -8 928.514 287.639   2
   2   4  -7 972.387 274.457   2
   2   4  -6 99.1264 26.0422   2
   2   4  -5 6613.31 709.884   2
   2   4  -5 5811.56 627.803   1
   2   4  -4 253.956 122.714   1
   2   4  -3 432.376 143.700   1
   2   4  -2 173.699 107.046   1
   2   4  -1 110.556 66.1585   1
   2   4   0 2600.89 350.796   1
   2   4   1 5062.72 485.161   1
   2   4   2 1568.77 275.463   1
   2   4   3 17183.9 956.725   1
   2   4   4 930.571 240.043   1
   2   4   5 17255.5 1046.50   1
   2   4   6 956.278 253.478   1
   2   4   7 951.979 245.920   1
   2   4   8 366.765 139.658   1
   2   4   8 168.032 54.6294   8
   2   4   9 129.065 53.7602   1
   2   4   9 130.283 34.6518   8
   2   4  10 383.990 175.976   1
   2   4  10 531.455 117.298   8
   2   4  11 1572.05 193.239   8
   2   4  12 15412.7 595.440   8
   2   4  13 3409.93 318.203   4
   2   4  14 550.218 112.153   4
   2   4  15 22.8314 23.1110   4
   2   4  16 17.1725 11.2775   4
   2   5 -15-17.4715 22.2483   9
   2   5 -14 42.2214 32.3125   9
   2   5 -13 39.1751 20.6378   9
  -2  -5  13 72.7957 44.8518   4
   2   5 -12 86.7869 46.4224   9
  -2  -5  12 149.392 67.1210   4
   2   5 -11 2084.21 254.673   9
  -2  -5  11 2203.68 235.639   4
  -2  -5  10 4756.56 353.651   4
   2   5 -10 4316.52 364.723   9
   2   5  -9 1808.55 228.719   9
   2   5  -9 1898.76 466.824   2
   2   5  -8 141.550 64.5465   9
   2   5  -8 161.540 105.135   2
  -2  -5   8 370.702 96.1132   4
   2   5  -7 125.909 53.6747   9
   2   5  -7 177.981 152.879   2
   2   5  -6 1198.72 329.425   2
   2   5  -5 67.3898 47.0051   1
   2   5  -4 1667.21 336.967   1
   2   5  -3 6372.21 646.107   1
   2   5  -2 1439.63 317.805   1
   2   5  -1 9244.54 739.557   1
   2   5   0 7851.57 686.922   1
   2   5   1 1572.31 301.622   1
   2   5   2 2418.38 383.610   1
   2   5   3 5466.64 600.277   1
   2   5   4 3752.09 516.527   1
   2   5   5 31230.6 1546.73   1
   2   5   6 8457.87 837.315   1
   2   5   7 224.232 171.093   1
   2   5   7 111.607 44.6690   8
   2   5   8-42.7867 54.4565   1
   2   5   8 33.6978 24.1200   8
   2   5   9 833.772 279.705   1
   2   5   9 400.833 102.069   8
   2   5  10 110.021 57.6588   8
  -2  -5 -10-9.73362 18.8868  12
   2   5  11 117.877 42.5917   8
   2   5  12 1125.64 154.563   8
   2   5  13 2662.26 272.106   4
   2   5  14 2149.97 214.999   4
   2   5  15-5.48852 14.2636   4
   2   6 -15-6.47036 16.5452   9
   2   6 -14 61.1354 40.2056   9
   2   6 -13 274.145 79.7084   9
  -2  -6  12 582.378 102.544   4
   2   6 -12 617.491 135.712   9
  -2  -6  11 44.5116 27.5583   4
   2   6 -11 27.2775 18.7025   9
   2   6 -10 7012.03 476.014   9
  -2  -6  10 6541.76 415.919   4
  -2  -6   9 7667.13 450.514   4
   2   6  -9 7679.64 491.619   9
   2   6  -8 2553.70 536.196   2
   2   6  -8 2430.73 266.354   9
   2   6  -7 1123.18 172.644   9
   2   6  -7 975.991 286.850   2
   2   6  -6 5852.81 790.094   2
   2   6  -6 5233.08 363.367   9
   2   6  -5 4405.28 626.017   1
   2   6  -4 6032.80 714.259   1
   2   6  -3 788.969 257.250   1
   2   6  -2 979.145 274.869   1
   2   6  -1 1413.38 312.894   1
   2   6   0 3119.56 468.948   1
   2   6   1 996.356 260.642   1
   2   6   2 2300.65 416.848   1
   2   6   3 41.7902 40.2636   1
   2   6   4 1431.59 338.561   1
   2   6   5 650.946 232.684   1
   2   6   6 791.268 155.342   8
   2   6   6 1739.60 390.291   1
   2   6   7 366.164 107.513   8
   2   6   7 472.594 178.935   1
   2   6   8 748.861 268.787   1
   2   6   8 376.871 101.893   8
   2   6   9 894.015 162.555   8
   2   6  10 44.8594 41.4797   8
  -2  -6 -10 17.6724 24.8377  12
  -2  -6 -11-10.5980 23.0922  12
   2   6  11 20.1815 16.2032   8
   2   6  12 939.329 137.737   8
   2   6  13-14.5476 30.1727   8
   2   6  13-8.38114 19.3939   4
   2   6  14-2.69440 17.1282   4
   2   6  15 49.0389 23.7505   4
   2   7 -14 238.676 57.6382   9
   2   7 -13 943.950 140.416   9
   2   7 -12 420.421 104.944   9
  -2  -7  12 377.389 79.4164   4
   2   7 -11 32.7535 27.7336   9
  -2  -7  11 30.9079 35.9868   4
   2   7 -10 0.47722 17.2937   9
  -2  -7  10-7.55589 36.4011   4
   2   7  -9 386.265 111.289   9
  -2  -7   9 368.625 92.1267   4
   2   7  -8 11.7827 43.8482   9
  -2  -7   8-1.52661 67.4217   4
   2   7  -7 5564.47 408.536   9
  -2  -7   7 5567.21 377.697   4
   2   7  -6 1047.84 162.530   9
   2   7  -6 819.078 319.825   2
  -2  -7   6 1042.24 155.253   4
   2   7  -5 1632.20 211.407   9
  -2  -7   5 1564.31 186.426   4
  -2  -7   4 501.886 99.4557   4
   2   7  -4 564.520 122.165   9
   2   7  -4 551.964 226.602   1
   2   7  -3 2284.44 466.565   1
   2   7  -2 8407.78 865.381   1
   2   7  -1 105.870 85.4980   1
   2   7   0 8493.70 842.610   1
   2   7   1 3818.07 572.123   1
   2   7   2 1662.64 385.011   1
   2   7   3 5392.97 316.106  10
  -2  -7  -3 4543.88 281.003   6
   2   7   4 1827.37 173.924  10
  -2  -7  -4 1047.63 147.752   6
   2   7   4 1383.53 370.351   1
   2   7   5 1295.81 337.858   1
   2   7   5 1287.92 151.587  10
  -2  -7  -5 840.530 133.783   6
   2   7   6 402.342 124.374   8
   2   7   6 1186.08 337.244   1
   2   7   6 923.035 130.981  10
   2   7   7 244.157 184.763   1
   2   7   7-40.2695 50.7254   8
   2   7   8 734.335 157.587   8
   2   7   9 403.863 110.362   8
  -2  -7 -10 72.4222 36.3338  12
   2   7  10-2.96689 37.6085   8
  -2  -7 -11-42.0219 30.0532  12
   2   7  11 44.0241 42.0773   8
  -2  -7 -12 257.333 60.9020  12
   2   7  12 278.190 74.3778   8
   2   7  13 374.193 83.4813   4
   2   7  13 373.038 63.3596   8
   2   7  14 51.0258 25.8261   4
   2   8 -13 159.314 45.4113   9
   2   8 -12 16.0880 29.1908   9
   2   8 -11 903.053 148.356   9
  -2  -8  11 785.183 115.171   4
  -2  -8  10 21.9336 13.0313   4
   2   8 -10-26.8194 30.9944   9
   2   8  -9 1897.14 239.100   9
  -2  -8   9 1783.25 206.816   4
   2   8  -8 404.518 107.592   9
  -2  -8   8 483.684 112.305   4
   2   8  -7 5504.27 413.422   9
  -2  -8   7 5106.92 370.498   4
  -2  -8   6 157.926 65.8007   4
   2   8  -6 251.444 73.8897   9
   2   8  -5-8.26903 73.3494   1
   2   8  -5 52.8772 42.8438   9
   2   8  -5 106.991 116.519   2
  -2  -8   5 31.5684 27.4302   4
   2   8  -4 1771.12 227.174   9
   2   8  -4 1095.52 351.074   1
  -2  -8   4 1544.68 195.035   4
  -2  -8   3-30.0562 39.7616   6
   2   8  -3-43.2640 63.4072   9
  -2  -8   3-25.9833 40.2704   4
   2   8  -3 16.7020 28.4913   1
   2   8  -2 434.039 237.765   1
  -2  -8   2 406.920 81.1865   6
   2   8  -1 7179.85 843.573   1
  -2  -8   1 8124.54 391.875   6
   2   8   0 49.3643 31.1508  10
   2   8   0 136.203 31.7594   1
  -2  -8   0 130.404 58.0929   6
  -2  -8  -1 30.6603 26.4466   6
   2   8   1 65.4679 43.5524  10
   2   8   2 232.292 96.5522   1
  -2  -8  -2 187.411 58.3158   6
   2   8   2 203.374 69.5333  10
   2   8   3 586.066 257.085   1
   2   8   3 544.759 107.730  10
  -2  -8  -3 492.747 102.553   6
   2   8   4 288.431 76.5718  10
  -2  -8  -4 214.022 71.1163   6
  -2  -8  -5 56.5918 39.7834   6
   2   8   5 134.769 128.024   1
   2   8   6 634.444 116.398  10
   2   8   6 595.600 158.015   8
   2   8   7 254.665 90.0322   8
   2   8   8 356.879 124.052   8
   2   8   9 495.480 121.076   8
  -2  -8 -10 153.446 49.7765  12
   2   8  10 39.8449 17.2589   8
  -2  -8 -11 74.6464 31.3700  12
   2   8  11 124.890 54.1600   8
  -2  -8 -12 49.9688 21.5036  12
   2   8  12 102.616 35.2637   8
   2   8  13 13.9234 18.3252   4
   2   9 -10 312.903 80.1925   9
  -2  -9  10 220.379 57.2311   4
   2   9  -9-14.6590 31.2557   9
  -2  -9   9 45.7068 31.6520   4
  -2  -9   8 491.162 105.614   4
   2   9  -8 725.292 139.367   9
   2   9  -8 441.123 88.9266  10
  -2  -9   7 42.4585 32.9786   4
   2   9  -7-73.2523 55.1332   9
   2   9  -6 104.256 52.4037   9
  -2  -9   6 157.627 63.0794   4
  -2  -9   5 522.032 108.406   4
  -2  -9   4 1596.49 202.160   4
  -2  -9   4 1618.49 171.479   6
  -2  -9   3 4742.92 300.612   6
  -2  -9   2 2439.93 222.976   6
  -2  -9   1 141.006 60.0908   6
   2   9  -1 104.916 42.0251  10
   2   9  -1 178.173 123.894   1
   2   9   0-71.9299 146.393   1
   2   9   0-31.0353 27.2834  10
  -2  -9   0-11.2813 29.8876   6
   2   9   1 968.581 157.464  10
   2   9   1 557.616 246.260   1
  -2  -9  -1 805.410 121.854   6
   2   9   2 913.253 144.003  10
  -2  -9  -2 945.279 140.430   6
   2   9   3 1704.16 182.670  10
  -2  -9  -3 1508.68 184.287   6
   2   9   4 6480.56 364.652  10
  -2  -9  -4 6231.82 380.459   6
   2   9   5 623.569 116.500  10
  -2  -9  -5 691.927 127.722   6
   2   9   5 526.661 147.071   8
   2   9   6 48.2718 18.0845  10
   2   9   6 178.002 88.4416   8
   2   9   7 132.062 78.8948   8
   2   9   8 1126.27 199.164   8
   2   9   9 546.127 113.176   8
  -2  -9  -9 614.413 112.556  12
  -2  -9 -10-7.96161 21.3164  12
   2   9  10 18.7555 9.78814   8
  -2  -9 -11 6.00343 9.24649  12
   2   9  11 14.0202 9.22654   8
   2   9  12 39.7124 16.7091   4
   2  10  -8 97.3931 44.4969  10
   2  10  -7-34.6154 29.8715  10
   2  10  -6 459.952 95.7308  10
   2  10  -5 1094.53 158.737  10
   2  10  -4 255.931 82.7227  10
  -2 -10   4 323.701 75.1076   6
   2  10  -3 5071.83 364.338  10
  -2 -10   3 5442.97 318.332   6
   2  10  -2 4037.10 331.221  10
  -2 -10   2 4133.87 284.516   6
  -2 -10   1 301.600 68.2450   6
   2  10  -1 371.898 99.5260  10
   2  10   0 144.577 60.8575  10
  -2 -10   0 172.235 58.1810   6
   2  10   1 9385.59 478.228  10
  -2 -10  -1 8939.38 432.577   6
   2  10   2 21384.7 682.030  10
  -2 -10  -2 20717.9 669.959   6
   2  10   3 21041.4 641.934  10
  -2 -10  -3 21781.0 697.667   6
   2  10   4 2820.79 230.557  10
   2  10   4 2613.93 280.960   8
  -2 -10  -4 2465.09 240.581   6
   2  10   5 2009.06 193.870  10
   2  10   5 2168.31 253.903   8
   2  10   6 80.6315 40.2755  10
   2  10   6 68.2187 27.2350   8
   2  10   7 1032.75 187.899   8
   2  10   8 252.601 93.3144   8
  -2 -10  -9-15.3105 19.1310  12
   2  10   9-4.59414 25.5401   8
   2  10  10 180.600 46.1961   8
  -2 -10 -10 202.779 48.3890  12
   2  11  -8 59.3477 23.2592  10
   2  11  -7 429.475 74.6459  10
   2  11  -6 276.236 60.0536  10
   2  11  -5 7.73797 15.1799  10
   2  11  -4 727.023 120.417  10
  -2 -11   4 777.694 101.357   6
   2  11  -3 1288.69 168.337  10
  -2 -11   3 1251.38 137.206   6
   2  11  -2-8.16725 7.95283  10
  -2 -11   2-0.94319 27.0834   6
   2  11  -1 39.2225 26.4870  10
  -2 -11   1 52.4200 40.0356   6
   2  11   0 139.774 55.4749  10
  -2 -11   0 106.473 49.4648   6
   2  11   1 60.5744 24.8674  10
  -2 -11  -1 100.829 38.1878   6
   2  11   2 628.746 109.349  10
  -2 -11  -2 767.638 121.692   6
  -2 -11  -3 106.225 41.4759   6
   2  11   3 72.2200 54.9255   8
   2  11   3 132.677 38.9107  10
   2  11   4 8064.89 364.332  10
   2  11   4 6951.84 428.678   8
   2  11   5 2573.70 198.555  10
   2  11   5 2642.96 256.637   8
   2  11   6 136.162 44.6388   8
   2  11   7 862.697 135.551   8
  -2 -11  -8 73.6176 31.0942  12
   2  11   8 63.9043 34.5614   8
   2  11   9 267.769 58.2176   8
  -2 -11  -9 211.288 46.0963  12
   2  12  -7-20.4935 12.9216  10
   2  12  -6 566.481 75.0339  10
   2  12  -5-5.81346 17.2749  10
   2  12  -4 23.4549 17.9613  10
   2  12  -3 121.982 40.4369  10
  -2 -12   3 143.646 42.0265   6
  -2 -12   2 39.7992 13.0292   6
   2  12  -2 59.5873 29.4055  10
  -2 -12   1 154.934 50.7318   6
   2  12  -1 171.256 48.2764  10
   2  12   0 323.661 77.9550  10
   2  12   0 292.322 65.6626   8
  -2 -12   0 416.800 83.3177   6
   2  12   1 60.3430 34.4705  10
   2  12   1 71.3924 21.8576   8
  -2 -12  -1 15.2308 25.7129   6
   2  12   2 374.542 88.1246   8
   2  12   2 514.751 87.0044  10
  -2 -12  -2 513.742 84.8950   6
   2  12   3 1763.03 156.068  10
   2  12   3 1400.11 166.705   8
   2  12   4-0.09190 33.4646   8
   2  12   4-18.4555 22.8670  10
   2  12   5 2397.75 200.152   8
   2  12   6 703.115 100.391   8
  -2 -12  -7 744.252 89.6080  12
   2  12   7 988.701 112.876   8
   2  13  -4 163.708 33.9033  10
   2  13  -3 15.8877 10.2250  10
   2  13  -2 0.85359 5.45267  10
   2  13  -1 2.65552 7.62879  10
   2  13   0 163.710 39.4917  10
   2  13   1 663.222 80.8481   8
   2  13   1 954.090 103.251  10
   2  13   2 193.904 45.0394  10
   2  13   2 96.8431 32.6646   8
   2  13   3 89.2061 31.1298   8
   2  13   3 85.7504 24.7812  10
   2  13   4 237.606 48.8189   8
  -3  14   4 67.7031 27.2336   8
   3 -14  -3 46.1239 22.0329   6
   3 -14  -2 70.8614 28.5178   6
   3 -14  -1 28.5179 19.4870   6
   3 -14   0-19.2219 29.1645   6
  -3  14  -1 178.900 39.5442  10
   3 -14   1 212.826 48.6275   6
  -3  14  -2 2.16824 7.11098  10
   3 -14   2 42.3817 19.2469   6
   3 -14   3 296.835 54.1539   6
  -3  14  -3 310.595 59.7999  10
  -3  14  -4 257.415 49.8787  10
   3 -14   4 342.365 56.1585   6
  -3  14  -5 18.8493 10.9135  10
   3 -14   5 10.2215 1.79614   6
  -3  13   6 114.132 39.4565   8
   3 -13  -6 136.861 31.7884  12
   3 -13  -4 92.8311 42.5162   6
   3 -13  -3 42.6217 34.4299   6
   3 -13  -2 638.037 105.180   6
   3 -13  -1 150.451 53.4597   6
  -3  13   0 60.7740 34.7446  10
   3 -13   0 25.0637 20.5214   6
   3 -13   1 1449.84 164.597   6
   3 -13   2 187.781 55.6217   6
   3 -13   3 4736.42 297.822   6
   3 -13   4 169.338 49.8000   6
   3 -13   5 11.7868 23.4765   6
   3 -13   6 14.6587 10.2892   6
   3 -13   7 122.410 35.5963   6
   3 -12  -9 22.1164 18.4102  12
   3 -12  -8-20.0737 23.0714  12
   3 -12  -7 1.43824 7.05634  12
  -3  12   7 51.0660 26.7346   8
   3 -12  -6 78.9768 41.4825  12
   3 -12  -5 5.73688 17.0379   6
   3 -12  -5 12.6042 5.23831  12
   3 -12  -4 865.609 119.216  12
   3 -12  -4 863.741 165.399  11
   3 -12  -4 811.476 123.967   6
   3 -12  -3 23.3509 25.0897  11
   3 -12  -3 96.2438 33.8892   6
   3 -12  -2 128.343 63.2605  11
   3 -12  -2 92.3879 46.8932   6
   3 -12  -1 599.987 107.737  11
   3 -12  -1 487.806 99.6363   6
   3 -12   0 26.4262 42.7930   6
   3 -12   1 1.46029 16.0644   6
   3 -12   2 32.0649 6.91079   6
   3 -12   3 140.212 54.8493   6
   3 -12   4 2721.38 252.957   6
   3 -12   5 1711.78 191.840   6
   3 -12   6 84.3128 41.1410   6
   3 -12   7 101.801 41.5406   6
   3 -12   8 6.61746 20.9794   6
   3 -12   9 661.059 87.4975   6
   3 -11 -11 21.7763 11.0895  12
   3 -11 -10 14.1209 9.02902  12
   3 -11  -9-9.16826 14.6428  12
  -3  11   8 64.7282 33.3805   8
   3 -11  -8 88.9687 46.7279  12
   3 -11  -7 22.5506 19.9197  12
   3 -11  -6 74.2778 47.3467  12
   3 -11  -6 124.918 107.607  11
   3 -11  -6 133.236 50.2165   6
   3 -11  -5 418.761 103.340   6
   3 -11  -5 563.606 142.637  11
   3 -11  -5 459.034 97.7069  12
   3 -11  -4 92.9212 47.9295   6
   3 -11  -4 202.684 81.4091  11
   3 -11  -4 93.7886 34.0781  12
   3 -11  -3 15.1975 19.4521   6
   3 -11  -3-0.31220 16.6833  12
   3 -11  -3-42.3023 66.9069  11
   3 -11  -2 599.546 115.458   6
   3 -11  -2 696.471 136.869  11
   3 -11  -1 2279.65 234.495   6
   3 -11  -1 2283.02 244.528  11
   3 -11   0-8.78663 3.20588   6
   3 -11   0 7.82399 9.29847  11
   3 -11   1 914.625 151.139   6
   3 -11   1 806.247 132.001  11
   3 -11   2 9.45811 21.1262   6
   3 -11   2-28.5034 40.2102  11
   3 -11   3 49.0662 44.1864   6
   3 -11   4 3663.64 340.724   4
   3 -11   5 3564.23 334.072   4
   3 -11   6 1791.26 228.189   4
   3 -11   7 1099.60 174.948   4
   3 -11   8 239.085 75.4217   4
   3 -11   9 58.4569 28.2795   4
   3 -11  10 0.36801 19.7765   4
   3 -11  11 752.129 97.9821   4
   3 -11  11 573.732 75.4353   6
   3 -10 -12-13.6895 23.2129  12
   3 -10 -11 61.9814 33.3537  12
   3 -10 -10 318.204 81.1821  12
   3 -10  -9 637.140 123.442  12
   3 -10  -8 466.127 107.130  12
   3 -10  -7 65.3994 34.2152  12
   3 -10  -7 117.487 84.1899  11
   3 -10  -6 121.005 34.4991   6
   3 -10  -6 165.815 68.3631  12
   3 -10  -6 55.6288 60.9420  11
   3 -10  -5 1174.02 166.131  12
   3 -10  -5 1210.51 165.534   6
   3 -10  -5 1112.05 179.823  11
   3 -10  -4 104.130 45.4183  12
   3 -10  -4 119.779 49.4789   6
   3 -10  -4 109.822 76.4283  11
   3 -10  -3 7271.44 472.622  11
   3 -10  -3 6691.40 390.748   6
   3 -10  -2 9300.32 468.335   6
   3 -10  -2 9645.08 528.195  11
   3 -10  -1 2025.38 242.377  11
   3 -10  -1 1872.28 218.173   6
   3 -10   0 17.1080 17.4729  11
   3 -10   0 25.7718 33.7800   6
   3 -10   1 1663.67 202.356   6
   3 -10   1 1355.75 193.345  11
   3 -10   2 442.856 111.442   4
   3 -10   2 351.869 104.091  11
   3 -10   3 69.0201 40.5436   4
   3 -10   3 101.575 60.0993  11
   3 -10   4 7908.74 509.095   4
   3 -10   4 7457.18 451.792  11
   3 -10   5 8704.45 541.075   4
   3 -10   5 9013.13 494.666  11
   3 -10   6 611.643 145.746   4
   3 -10   7 144.722 65.1072   4
   3 -10   8 6.73333 37.4652   4
   3 -10   9 56.3060 43.6455   4
   3 -10  10-18.2442 29.8839   4
   3 -10  11 38.4039 2.82372   4
   3 -10  12 608.267 96.4617   4
   3  -9 -13 18.2465 22.6571  12
   3  -9 -12-20.4216 24.2187  12
   3  -9 -11-9.40441 8.18429  12
   3  -9 -10 10.9380 18.5726  12
   3  -9  -9 1026.99 168.408  12
   3  -9  -8 183.620 138.673  11
   3  -9  -8 531.171 119.666  12
   3  -9  -7 10.5780 28.1857   6
   3  -9  -7 39.3631 37.4997  12
   3  -9  -6 56.4675 35.0736   6
   3  -9  -6-10.4801 48.9650  11
   3  -9  -6 50.1551 40.1049  12
  -3   9   5 1139.82 334.822   1
   3  -9  -5 1383.09 179.228  12
   3  -9  -5 1429.89 165.111   6
   3  -9  -5 881.746 180.474  11
  -3   9   4 1068.83 314.545   1
   3  -9  -4 1319.06 167.803   6
   3  -9  -4 811.390 148.602  11
   3  -9  -3 188.978 79.0485  11
   3  -9  -3 323.534 80.6287   6
   3  -9  -2 238.947 76.6145   6
   3  -9  -2 233.662 68.0797   7
  -3   9   2 179.502 86.1734   1
   3  -9  -2 90.3598 20.8136  11
   3  -9  -1 2007.21 229.878   7
   3  -9  -1 1077.62 180.198  11
   3  -9  -1 1697.88 199.236   6
  -3   9   1 2092.54 375.436   1
   3  -9   0 2125.21 212.561   6
   3  -9   0 2003.13 230.798  11
   3  -9   1 1518.84 198.453   4
   3  -9   1 1550.20 204.600  11
   3  -9   2 1530.07 206.672   4
   3  -9   2 1286.48 188.893  11
   3  -9   3 272.291 84.0807   4
   3  -9   3 203.854 69.7641  11
   3  -9   4 181.737 45.0641  11
   3  -9   4 258.625 88.8820   4
   3  -9   5 661.613 143.480   4
   3  -9   5 634.993 132.449  11
   3  -9   6 4962.67 383.830  11
   3  -9   6 4700.37 395.095   4
   3  -9   7 964.751 182.569   4
   3  -9   7 1000.00 163.822  11
   3  -9   8 369.908 105.814   4
   3  -9   8 408.406 100.763  11
   3  -9   9 495.542 125.746   4
   3  -9  10 779.602 149.228   4
   3  -9  11 128.840 49.5973   4
   3  -9  12 81.2194 45.1389   4
   3  -9  13 75.1994 33.7359   4
   3  -8 -14 35.9835 21.8649  12
   3  -8 -13 108.552 43.8650  12
   3  -8 -12-40.6749 37.9072  12
   3  -8 -11 82.6434 47.2383  12
   3  -8 -10 155.700 65.8132  12
   3  -8  -9 472.067 117.614  12
   3  -8  -8 140.708 93.4440  11
   3  -8  -8-16.9211 27.5756  12
  -3   8   7 392.144 81.3898   1
   3  -8  -7 238.868 82.7381  12
   3  -8  -6 487.265 106.798  12
  -3   8   6 366.411 137.538   1
   3  -8  -6 360.803 120.599  11
   3  -8  -6 414.710 83.5652   6
   3  -8  -5 1220.46 201.734   7
  -3   8   5 1877.77 424.658   1
   3  -8  -5 1742.01 195.036  12
   3  -8  -5 1588.07 152.824   6
   3  -8  -5 1200.80 201.203  11
   3  -8  -4 2204.26 195.937   6
   3  -8  -4 1841.20 238.269   7
   3  -8  -4 1452.96 205.536  11
   3  -8  -3-9.93701 18.6617   7
   3  -8  -3 43.4952 28.8986  11
  -3   8   2 2745.97 461.228   1
  -3   8   1 141.132 88.2457   1
  -3   8   0-48.5809 65.3637   1
   3  -8   3 319.710 87.4930   4
   3  -8   4 52.8644 11.5143  11
   3  -8   4 25.7910 30.1407   4
   3  -8   5 55.3890 36.8331  11
   3  -8   5 5.82154 31.8732   4
   3  -8   6 20537.6 799.900   4
   3  -8   6 19978.6 791.622  11
   3  -8   7 10490.9 584.429  11
   3  -8   7 10549.4 590.622   4
   3  -8   8 4712.51 402.174   4
   3  -8   8 4380.18 374.651  11
   3  -8   9 90.9882 49.3938  11
   3  -8   9 200.534 82.8365   4
   3  -8  10 1402.96 213.133   4
   3  -8  10 1308.67 198.393  11
   3  -8  11 1009.34 173.228   4
   3  -8  11 993.943 159.601  11
   3  -8  12 500.027 113.256   4
   3  -8  13 135.281 44.7633   4
   3  -8  14 243.218 61.3076   4
   3  -7 -14 160.741 52.3906  12
   3  -7 -13-24.3285 28.0165  12
   3  -7 -12-2.52501 34.6537  12
   3  -7 -11 148.733 53.8261  12
   3  -7 -10 365.267 109.015  12
   3  -7  -9-0.99400 29.9403  12
  -3   7   8 170.822 132.157   1
   3  -7  -8 327.336 90.8314  12
   3  -7  -8 553.750 165.830  11
   3  -7  -7 204.497 71.1513  11
   3  -7  -7 334.724 93.4298  12
  -3   7   7 214.391 140.025   1
   3  -7  -6 2539.31 285.734   7
  -3   7   6 3261.80 553.218   1
   3  -7  -6 2338.52 223.529  12
   3  -7  -6 2580.11 270.916  11
   3  -7  -5 1655.91 218.307   7
   3  -7  -5 1550.83 191.967  11
  -3   7   4 1394.28 327.195   1
  -3   7   3 190.093 69.2716   1
  -3   7   2 1802.51 337.627   1
  -3   7   1 83.5203 53.9128   1
  -3   7   0 2990.08 393.960   1
  -3   7  -1 4542.06 453.478   1
   3  -7   6 109.551 59.1454   4
   3  -7   7 2553.81 275.135   4
   3  -7   8 996.022 181.279   4
   3  -7   9 2531.58 294.558   4
   3  -7  10 590.722 148.344   4
   3  -7  11 3788.75 358.654   4
   3  -7  12 79.4396 50.1155   4
   3  -7  13 4.20775 9.76191   4
   3  -7  13 17.9345 14.4239  11
   3  -7  14 51.5898 20.7924   4
   3  -7  15-0.44420 2.42997   4
   3  -6 -15-17.3799 21.0564  12
   3  -6 -14 26.4932 28.3592  12
   3  -6 -13 113.655 52.2190  12
  -3   6  12 75.9170 39.0068   4
   3  -6 -12 37.2184 42.2799  12
   3  -6 -11 1201.65 190.677  12
   3  -6 -10 2370.35 270.686  12
  -3   6   9 219.388 161.573   1
   3  -6  -9 992.768 165.520  12
   3  -6  -8 1602.48 197.747  12
  -3   6   8 1229.04 365.221   1
   3  -6  -7 913.577 141.699  12
   3  -6  -7 900.597 162.175   7
  -3   6   7 626.488 229.932   1
   3  -6  -7 827.676 146.993  11
  -3   6   6 357.147 160.404   1
  -3   6   5 2144.01 390.214   1
  -3   6   4 12959.0 918.977   1
  -3   6   3 5232.51 565.850   1
  -3   6   2 2215.07 344.457   1
  -3   6   1 14298.2 839.578   1
   3  -6   0 6697.29 707.249   3
  -3   6   0 7104.88 548.833   1
   3  -6   1 1820.87 359.392   3
  -3   6  -1 1923.65 263.057   1
   3  -6   2 2487.81 408.553   3
  -3   6  -2 2830.65 322.209   1
   3  -6   3 3696.01 498.023   3
   3  -6   7 1728.23 203.067   4
   3  -6   7 2623.89 237.523   8
   3  -6   8 615.462 116.975   8
   3  -6   8 569.093 115.275   4
   3  -6   9 1504.78 210.334   4
   3  -6   9 1580.85 187.930   8
   3  -6  10 1378.27 202.521   4
   3  -6  11 21.0382 9.62507   4
   3  -6  12 42.8767 23.6033   4
   3  -6  13 205.778 77.1359   4
   3  -6  14 53.1252 33.7989   4
   3  -6  15 102.632 43.6799   4
   3  -5 -15 31.5575 23.2345  12
   3  -5 -14 209.557 67.4174  12
   3  -5 -13 115.541 54.3474  12
   3  -5 -12 116.277 72.5473  12
   3  -5 -11 2001.93 247.349  12
   3  -5 -10 1308.32 198.663  12
   3  -5  -9 192.262 68.2853  12
  -3   5   9 17.3723 76.2874   1
   3  -5  -8 6.49196 43.3212  11
   3  -5  -8-41.7133 68.5353   7
  -3   5   8-6.74280 47.7313   1
   3  -5  -8-14.8825 10.7879  12
  -3   5   7 133.213 135.490   1
  -3   5   6 1499.15 347.271   1
  -3   5   5 63241.6 2036.60   1
  -3   5   4 109236. 2474.40   1
  -3   5   3 3652.65 412.070   1
  -3   5   2 238.502 95.2501   1
   3  -5  -2 193.107 98.0437   3
  -3   5   1 559.214 148.099   1
   3  -5  -1 525.424 180.379   3
   3  -5   0 8664.64 741.033   3
  -3   5   0 9712.55 559.841   1
  -3   5  -1 877.692 150.221   1
   3  -5   1 1145.57 261.706   3
   3  -5   2 23696.2 1195.76   3
  -3   5  -2 23007.4 751.055   1
  -3   5  -2 21342.7 707.198   2
   3  -5   3 715.745 196.917   3
   3  -5   4 660.127 196.195   3
   3  -5   5-14.7182 58.4771   3
   3  -5   8 1260.40 170.802   4
   3  -5   8 2178.86 216.411   8
   3  -5   9 1131.06 175.680   4
   3  -5   9 1121.61 156.396   8
   3  -5  10 663.628 137.422   4
   3  -5  10 809.189 133.016   8
   3  -5  11 2160.50 256.246   4
   3  -5  12 293.258 93.2951   4
   3  -5  13 28.6987 46.0736   4
   3  -5  14 97.9484 47.9494   4
   3  -5  15-6.29973 26.7843   4
   3  -5  16 44.0007 20.8568   4
   3  -4 -15 31.3605 34.4787  12
   3  -4 -14 239.001 68.9444  12
   3  -4 -13 179.947 82.0210  12
   3  -4 -12 4568.37 376.320  12
   3  -4 -11 6691.41 455.396  12
   3  -4 -10 132.328 58.4541  12
   3  -4 -10 84.2058 182.243   2
   3  -4  -9 363.912 203.649   2
   3  -4  -9 265.122 86.0177  12
   3  -4  -8 308.557 166.788   2
   3  -4  -7 2531.68 451.969   2
   3  -4  -6-52.7229 90.8513   2
   3  -4  -5 40956.6 1569.14   2
   3  -4  -4 17808.0 1001.07   3
   3  -4  -3 976.663 239.009   3
  -3   4   3 7243.69 549.540   1
   3  -4  -2 2097.33 336.798   3
  -3   4   2 2387.30 279.583   1
   3  -4  -1 11932.4 795.882   3
  -3   4   1 12259.4 591.609   1
   3  -4   0 15090.2 874.357   3
  -3   4   0 16595.3 626.095   1
   3  -4   1 8017.18 621.183   3
  -3   4  -1 8638.64 398.511   1
   3  -4   2 12.7516 10.2233   3
  -3   4  -2 50.8811 18.7958   2
  -3   4  -2 60.9528 11.1592   1
  -3   4  -3 6.59914 16.4461   2
   3  -4   3 53.8670 75.5170   3
   3  -4   4 1255.11 244.395   3
  -3   4  -4 1210.42 173.358   2
  -3   4  -5 16929.4 775.849   2
   3  -4   5 16052.9 872.932   3
  -3   4  -6 4049.49 418.540   2
  -3   4  -7 703.523 192.745   2
   3  -4   9 914.642 147.594   4
   3  -4   9 1920.44 202.576   8
   3  -4  10 7764.67 417.128   8
   3  -4  10 6327.97 424.991   4
   3  -4  11 305.558 104.157   4
   3  -4  12 12731.3 622.905   4
   3  -4  13 3382.80 314.788   4
   3  -4  14 725.978 133.268   4
   3  -4  15 89.2506 38.5753   4
   3  -4  16 295.366 69.1906   4
   3  -3 -15 92.7479 43.3850  12
   3  -3 -14 100.845 59.4159  12
   3  -3 -13-5.29661 16.4348  12
   3  -3 -12 105.614 54.4699  12
   3  -3 -11 2785.14 285.012  12
   3  -3 -11 2666.66 579.479   2
   3  -3 -10 130.177 57.1845  12
   3  -3 -10-88.0671 166.660   2
   3  -3  -9 33.7247 58.7904   2
   3  -3  -9 12.1503 23.6485  12
   3  -3  -8 183.391 105.281   2
   3  -3  -7 5591.61 671.390   2
   3  -3  -6 483.482 170.021   2
   3  -3  -5 3361.61 390.098   3
   3  -3  -5 3071.54 408.061   2
   3  -3  -4 8778.01 640.817   3
   3  -3  -4 8239.73 590.904   2
   3  -3  -3 3369.62 390.005   3
   3  -3  -3 2572.33 278.090   2
   3  -3  -2 3357.74 374.731   3
  -3   3   1 71545.7 1201.81   1
   3  -3  -1 66990.2 1661.29   3
   3  -3   0 8746.37 598.470   3
  -3   3   0 8859.24 373.378   1
  -3   3  -1 2349.83 135.173   1
   3  -3   1 2565.54 307.892   3
   3  -3   2 3118.72 340.251   3
  -3   3  -2 2739.93 154.347   2
   3  -3   3 1288.64 216.450   3
  -3   3  -3 1294.10 143.343   2
  -3   3  -4 280.916 83.3468   2
   3  -3   4 267.938 93.7781   3
   3  -3   5 91864.7 1882.07   3
  -3   3  -5 91792.7 1772.54   2
   3  -3   6 46165.4 1340.08   3
  -3   3  -6 47069.8 1440.87   2
  -3   3  -7-27.5919 73.5093   2
  -3   3  -8 206.925 87.1410   2
   3  -3   9 1854.26 198.235   8
  -3   3  -9 2043.12 414.863   2
   3  -3  10 44.7236 42.8545   8
   3  -3  10-14.5699 45.7647   4
   3  -3  11 2411.22 230.362   8
   3  -3  11 2101.18 249.795   4
   3  -3  12 788.372 159.569   4
   3  -3  13 275.127 85.8082   4
   3  -3  14-32.0837 43.4469   4
   3  -3  15 39.9271 16.1341   4
   3  -3  16 206.109 57.9022   4
   3  -2 -16-10.7373 11.3333   9
   3  -2 -15 101.777 34.4060   9
   3  -2 -15 168.859 55.7725  12
   3  -2 -14 420.821 99.8926  12
   3  -2 -13 147.803 75.4232  12
   3  -2 -12 51.2930 34.8322  12
   3  -2 -11-72.0612 176.507   2
   3  -2 -11 15.1000 13.5870  12
   3  -2 -10 126.024 55.9358  12
   3  -2 -10 175.422 151.028   2
   3  -2  -9 955.225 150.170  12
   3  -2  -9 1385.35 405.085   2
   3  -2  -8 1291.64 366.901   2
   3  -2  -7 842.859 257.956   2
   3  -2  -6 2555.94 401.972   2
   3  -2  -5 3957.67 434.470   2
   3  -2  -5 3532.35 367.354   3
   3  -2  -4 1748.98 252.743   3
   3  -2  -4 1694.85 251.446   2
   3  -2  -3 12773.2 675.655   3
   3  -2  -3 11742.2 576.008   2
   3  -2  -2 44853.0 1196.34   3
   3  -2  -2 43255.8 929.612   2
   3  -2  -1 15340.4 685.511   3
   3  -2  -1 11304.7 296.371   2
  -3   2   0 237.050 40.8990   1
   3  -2   1 22949.3 868.783   3
   3  -2   2 3660.23 360.237   3
  -3   2  -2 2765.62 149.242   2
  -3   2  -3 5819.65 329.993   2
   3  -2   3 6026.04 458.576   3
   3  -2   4 3644.00 362.514   3
  -3   2  -4 3613.06 318.623   2
   3  -2   5 1578.33 236.883   3
  -3   2  -5 1822.20 265.965   2
  -3   2  -6 43.7285 63.1560   2
   3  -2   6 45.1928 36.3018   3
  -3   2  -7 4333.82 523.577   2
  -3   2  -8 859.531 242.744   2
   3  -2   9 1171.41 160.736   4
  -3   2  -9 2309.55 443.162   2
  -3   2 -10 137.917 66.2992   2
   3  -2  10 145.556 65.1521   8
   3  -2  10 103.116 58.3186   4
   3  -2  11 73.8237 22.6385   8
   3  -2  11 120.892 59.4808   4
   3  -2  12 40.9757 42.5125   4
   3  -2  13 68.1865 33.7637   4
   3  -2  14 859.446 150.876   4
   3  -2  15 292.079 77.3247   4
   3  -2  16 182.034 58.8158   4
   3  -1 -16 431.928 74.7606   9
   3  -1 -15-8.68340 10.7069   9
   3  -1 -14 694.815 122.099  12
   3  -1 -13 2406.10 258.355  12
   3  -1 -12 72.5597 37.0139  12
   3  -1 -11-13.4155 159.281   2
   3  -1 -11 45.6682 35.8708  12
   3  -1 -10 1984.48 497.520   2
   3  -1 -10 1580.01 201.840  12
   3  -1  -9-6.32630 85.6932   2
   3  -1  -8 942.403 269.320   2
   3  -1  -7 4416.06 561.740   2
   3  -1  -6 10421.6 786.565   2
   3  -1  -5 582.028 130.294   3
   3  -1  -5 644.462 177.147   2
   3  -1  -4 882.058 156.308   3
   3  -1  -4 886.986 178.611   2
   3  -1  -3 5684.64 390.472   3
   3  -1  -3 5514.57 380.682   2
   3  -1  -2 30303.4 941.934   3
   3  -1  -2 26467.0 688.239   2
   3  -1  -1 32412.1 958.227   3
   3  -1  -1 26877.4 533.373   2
   3  -1   0 29208.9 373.063   2
   3  -1   1 12053.7 570.192   3
   3  -1   2 6710.97 430.519   3
  -3   1  -3 13032.2 531.071   2
   3  -1   3 12411.0 605.332   3
   3  -1   4 19035.5 501.404   1
  -3   1  -4 20451.2 797.564   2
   3  -1   5 7941.08 501.524   3
  -3   1  -5 9382.92 620.334   2
  -3   1  -6 623.114 175.322   2
   3  -1   6 550.659 138.869   3
  -3   1  -7 436.468 165.849   2
  -3   1  -8 8391.95 786.521   2
  -3   1  -9 1132.54 310.795   2
  -3   1 -10 232.238 125.658   2
   3  -1  10 218.158 82.3386   8
   3  -1  10 235.865 61.3537   4
  -3   1 -11 1172.60 351.742   2
   3  -1  11 1477.86 192.223   8
   3  -1  11 1161.60 181.261   4
   3  -1  12 352.742 99.9341   4
   3  -1  13 2833.21 284.760   4
   3  -1  14 361.422 95.4297   4
   3  -1  15 13.1976 29.9607   4
   3  -1  16 27.3787 20.8160   4
   3   0 -16 59.6160 29.8875   9
   3   0 -15 215.916 62.0126   9
   3   0 -14 730.305 139.706   9
   3   0 -14 724.171 119.467  12
   3   0 -13 177.078 76.4887  12
   3   0 -12 462.112 117.064  12
   3   0 -11 3240.37 305.719  12
   3   0 -11 1918.87 491.010   2
   3   0 -10 28.9129 18.1401  12
   3   0 -10 56.5065 137.018   2
   3   0  -9 3357.46 578.913   2
   3   0  -8 106.194 93.1838   2
   3   0  -7 5040.52 596.305   2
   3   0  -6 2694.18 391.736   2
   3   0  -5 576.860 110.530   3
   3   0  -5 528.749 157.699   2
   3   0  -4 8937.09 459.193   3
   3   0  -4 8886.93 578.324   2
   3   0  -3 23.1436 27.0445   3
   3   0  -3 19.3231 21.9126   2
   3   0  -2 37960.5 943.415   3
   3   0  -2 38066.1 966.792   2
   3   0  -1 158814. 2056.73   3
   3   0   0 24018.4 586.790   1
   3   0   1 3168.99 185.811   1
   3   0   2 8743.65 309.437   1
   3   0   3 4387.64 258.157   1
   3   0   4 1287.77 153.103   1
   3   0   5 3151.44 347.149   3
   3   0   5 3661.30 300.017   1
   3   0   6 13830.7 736.023   3
   3   0   6 15122.9 704.359   1
  -3   0  -6 15825.3 931.329   2
   3   0   7 2627.09 324.955   1
  -3   0  -7 3077.04 445.401   2
   3   0   7 2583.08 301.457   3
  -3   0  -8 249.101 93.1048   2
  -3   0  -9 670.713 243.925   2
   3   0   9 444.527 103.313   4
   3   0  10 6021.04 385.556   8
  -3   0 -10 4807.28 696.355   2
   3   0  10 5212.63 377.914   4
   3   0  11 500.532 114.045   8
   3   0  11 465.376 111.349   4
   3   0  12 3230.95 284.253   8
   3   0  12 2548.41 279.139   4
   3   0  13 335.064 102.143   4
   3   0  14 13.5996 16.5414   4
   3   0  15 56.9431 37.7360   4
   3   0  16 12.5972 10.4096   4
   3   1 -16 78.9527 34.1618   9
   3   1 -15 254.838 72.7993   9
   3   1 -14 3282.51 301.280   9
   3   1 -13 7671.11 439.482  12
   3   1 -13 7312.87 482.146   9
   3   1 -12 2589.30 269.566  12
   3   1 -11 300.796 175.548   2
   3   1 -11 651.179 139.116  12
   3   1 -10 3395.39 301.547  12
   3   1 -10 2775.62 565.041   2
   3   1  -9 191.834 107.637   2
   3   1  -9 41.2806 24.7235  12
   3   1  -8 281.703 152.919   2
   3   1  -7 173.317 132.800   2
   3   1  -6 758.163 206.483   2
   3   1  -5 76.7952 54.0792   2
   3   1  -4 2923.26 251.870   3
   3   1  -4 2540.33 313.933   2
   3   1  -3-7.46922 37.4681   3
   3   1  -3 9.48956 13.6938   2
   3   1  -2 19436.1 784.559   1
   3   1  -1 68758.7 1336.70   1
   3   1   0 34315.6 858.130   1
   3   1   1 48735.9 993.551   1
   3   1   2 6655.40 371.998   1
   3   1   3 573.790 113.077   1
   3   1   4 3428.48 310.602   1
   3   1   5 5298.16 402.450   1
   3   1   6 5983.64 460.157   1
   3   1   7 336.114 125.284   1
   3   1   9 6205.73 363.784   8
   3   1  10 3370.88 289.758   8
   3   1  10 3229.70 297.790   4
   3   1  11 117.685 12.3748   8
   3   1  11 60.3887 36.2971   4
   3   1  12 1059.98 162.220   8
   3   1  12 891.179 164.317   4
   3   1  13 149.113 59.9535   4
   3   1  14 361.432 96.2762   4
   3   1  15 58.6212 44.1730   4
   3   1  16-1.60650 6.35813   4
   3   2 -16 29.0390 29.5248   9
   3   2 -15 13.5304 23.2127   9
   3   2 -14 1443.14 197.906   9
   3   2 -13 1083.95 181.310   9
   3   2 -12 4066.93 329.422  12
   3   2 -12 3830.20 354.262   9
   3   2 -11 497.828 120.076  12
   3   2 -10 421.260 202.326   2
   3   2 -10 839.473 150.359  12
   3   2  -9 212.243 81.9322  12
   3   2  -9 383.969 228.346   2
   3   2  -8 2294.34 452.375   2
   3   2  -7 21058.5 1281.52   2
   3   2  -6 3318.58 453.913   2
   3   2  -5 97.7812 91.6564   2
   3   2  -4 12703.4 565.735   3
   3   2  -4 12618.9 832.080   2
   3   2  -3 20989.5 962.066   1
   3   2  -2 966.430 196.354   1
   3   2  -1 17046.4 750.631   1
   3   2   0 50421.2 1252.93   1
   3   2   1 16067.2 723.630   1
   3   2   2 81087.6 1593.69   1
   3   2   3 126069. 2078.69   1
   3   2   4 69.2765 68.0504   1
   3   2   5 3288.78 365.472   1
   3   2   6 18.2943 29.1656   1
   3   2   7 551.660 165.295   1
   3   2   8 97.7740 55.1121   1
   3   2   9 268.345 75.7423   8
   3   2  10 6652.18 398.800   8
   3   2  11 1358.21 184.796   8
   3   2  11 1284.39 197.436   4
   3   2  12 1550.04 199.249   8
   3   2  12 1361.45 198.914   4
   3   2  13 241.084 66.6955   8
   3   2  13 217.249 82.1707   4
   3   2  14 382.519 96.1739   4
   3   2  15 77.0183 42.4988   4
   3   2  16 332.804 61.1108   4
   3   3 -16 53.2894 25.1501   9
   3   3 -15 27.8472 25.2938   9
   3   3 -14 35.9780 30.2166   9
   3   3 -13 81.9151 37.7365   9
   3   3 -12 1343.58 210.528   9
   3   3 -12 1581.86 210.975  12
   3   3 -11 3927.70 336.376  12
   3   3 -11 3505.39 345.817   9
   3   3 -10 11230.6 576.524   9
   3   3 -10 11842.7 572.658  12
   3   3  -9 442.553 109.777   9
   3   3  -9 824.482 270.093   2
   3   3  -9 883.277 149.523  12
   3   3  -8 190.463 66.3091   9
   3   3  -8 240.027 169.931   2
   3   3  -7 1777.22 386.855   2
   3   3  -6 32.5585 56.6485   2
   3   3  -5 917.866 244.400   2
   3   3  -4 107509. 2540.86   1
   3   3  -3 60621.1 1788.61   1
   3   3  -2 954.901 202.626   1
   3   3  -1 35214.0 1235.33   1
   3   3   0 16204.8 811.163   1
   3   3   1 10573.0 665.281   1
   3   3   2 28926.8 1116.42   1
   3   3   3 13561.9 779.008   1
   3   3   4 14714.7 843.189   1
   3   3   5 15292.8 914.740   1
   3   3   6 4797.62 531.527   1
   3   3   7 284.617 109.030   1
   3   3   8 38.9194 24.3317   1
   3   3   8-24.3509 38.5583   8
   3   3   9 64.0180 25.9371   8
   3   3  10 22.5511 33.9327   8
   3   3  11 14831.6 624.881   8
   3   3  12 91.9343 53.9115   8
   3   3  12 41.5233 34.3337   4
   3   3  13 6346.46 373.574   8
   3   3  13 5302.94 389.416   4
   3   3  14 78.0738 52.8889   4
   3   3  15 75.2225 34.8820   4
   3   3  16 67.6986 25.7256   4
   3   4 -15 33.0209 29.0579   9
   3   4 -14 79.9099 42.0768   9
   3   4 -13 1026.25 173.586   9
   3   4 -12 449.594 117.867   9
   3   4 -11 293.975 100.492   9
   3   4 -11 361.122 109.649  12
   3   4 -10 3753.10 341.183   9
   3   4 -10 3592.67 331.543  12
   3   4  -9 95.5098 145.972   2
   3   4  -9 102.967 35.7716   9
   3   4  -9 234.071 73.2240  12
   3   4  -8 66.0957 49.4415   2
   3   4  -8 30.4658 19.2992   9
   3   4  -8 146.032 62.4294  12
   3   4  -7 9.16868 34.1517   9
   3   4  -7-53.7075 84.7511   2
   3   4  -6 831.287 254.345   2
   3   4  -5 198.370 141.529   2
   3   4  -4 58.4858 66.7713   1
   3   4  -3 266.146 117.421   1
   3   4  -2 13457.1 879.842   1
   3   4  -1 7776.89 646.469   1
   3   4   0 1650.12 289.811   1
   3   4   1 3547.23 430.103   1
   3   4   2 1520.84 278.715   1
   3   4   3 4384.59 498.855   1
   3   4   4 4102.72 493.831   1
   3   4   5 25096.4 1269.02   1
   3   4   6 2797.50 425.278   1
   3   4   7 576.928 120.250   8
   3   4   7 1160.28 294.145   1
   3   4   8 255.620 125.771   1
   3   4   8 73.7696 42.3148   8
   3   4   9 772.660 144.763   8
   3   4  10 3446.55 305.257   8
   3   4  11 2205.15 240.763   8
   3   4  12 1304.41 174.824   8
   3   4  12 1199.19 194.668   4
   3   4  13 1522.09 175.408   8
   3   4  13 1325.23 184.450   4
   3   4  14 152.088 56.4004   4
   3   4  15 97.6969 36.8271   4
   3   5 -15 108.591 40.4594   9
   3   5 -14-30.3534 29.4119   9
   3   5 -13 45.5048 31.9855   9
   3   5 -12 23.7661 37.0080   9
   3   5 -11 19.2752 14.6186   9
   3   5 -10 970.155 178.377   9
   3   5 -10 857.693 161.489  12
   3   5  -9 359.495 111.659   9
   3   5  -9 294.796 81.9378  12
   3   5  -8 4809.06 389.215  12
   3   5  -8 3601.15 330.092   9
   3   5  -8 3288.49 597.106   2
   3   5  -7-32.2689 112.042   2
   3   5  -7-26.7647 28.4894   9
   3   5  -7-0.99068 24.8059  12
   3   5  -6 24.6779 34.3508   9
   3   5  -6-12.3018 36.7218  12
   3   5  -5 3121.86 512.453   1
   3   5  -4 3327.11 529.270   1
   3   5  -3 1101.46 282.323   1
   3   5  -2 33283.2 1528.82   1
   3   5  -1 1585.26 323.741   1
   3   5   0 335.422 141.902   1
   3   5   1 139.815 136.204   1
   3   5   2 0.33432 85.1595   1
   3   5   3-56.8180 119.178   1
   3   5   4 804.314 245.493   1
   3   5   5 311.038 149.367   1
   3   5   6 255.632 139.900   1
   3   5   6 137.104 67.1719   8
   3   5   7 1216.91 316.299   1
   3   5   7 1294.96 151.551  10
   3   5   7 748.511 141.135   8
   3   5   8 499.103 183.192   1
   3   5   8 269.703 89.7635   8
   3   5   9 76.8526 33.6902   8
   3   5  10 3167.95 300.424   8
   3   5  11 732.614 136.901   8
   3   5  12 127.913 37.7403   8
   3   5  13 802.899 120.562   8
   3   5  13 569.312 110.884   4
   3   5  14 398.705 79.6164   4
   3   5  15 0.97962 5.31348   4
   3   6 -14 336.037 77.2663   9
   3   6 -13 281.847 84.0578   9
   3   6 -12 1597.60 213.245   9
   3   6 -11 1203.13 196.116   9
   3   6 -10 674.895 157.005   9
   3   6  -9 1646.18 236.790   9
   3   6  -8 1460.57 222.960   9
   3   6  -7 1655.57 228.576   9
   3   6  -7 1193.33 321.506   2
   3   6  -6 464.490 112.328   9
   3   6  -6 485.081 250.247   2
   3   6  -5 68.0667 133.971   1
   3   6  -5 8.80413 13.0537   9
   3   6  -4 1078.67 167.044   9
   3   6  -4 1767.98 390.780   1
   3   6  -3 401.909 169.746   1
   3   6  -2 88.0617 45.0476   1
   3   6  -1 8476.24 819.143   1
   3   6   0 3869.35 541.437   1
   3   6   1 15.6516 55.9456   1
   3   6   2 8061.75 804.936   1
   3   6   3 291.784 141.670   1
  -3  -6  -4-34.2890 32.0227   6
   3   6   4-34.6253 23.9693  10
   3   6   4 32.2032 28.9125   8
   3   6   5 1609.86 167.914  10
   3   6   5 1440.55 200.415   8
   3   6   6-6.89871 11.5984  10
   3   6   6-9.54198 98.7774   1
   3   6   6-104.935 69.1817   8
   3   6   7 2666.63 238.216  10
   3   6   7 2136.96 256.658   8
   3   6   7 2512.00 465.335   1
   3   6   8 1567.51 224.859   8
   3   6   9 427.761 108.599   8
   3   6  10 277.299 90.8678   8
  -3  -6 -10 206.523 64.7618  12
   3   6  11 3543.87 293.685   8
   3   6  12 902.938 135.392   8
   3   6  13 16.7317 14.0534   8
   3   6  13 12.4089 24.9411   4
   3   6  14 233.721 52.5744   4
   3   7 -13 63.3560 27.5482   9
   3   7 -12 347.296 92.8874   9
   3   7 -11 92.9988 51.1614   9
   3   7 -10 824.653 165.228   9
   3   7  -9 3211.19 328.180   9
   3   7  -8 23.7879 33.2305   9
   3   7  -7 2177.71 267.728   9
   3   7  -6 492.895 126.268   9
   3   7  -6 271.686 109.336   2
   3   7  -5 31.4577 8.31047   9
   3   7  -5 97.8277 140.084   1
   3   7  -4-15.0473 32.2962   9
   3   7  -4 31.9787 105.259   1
   3   7  -3 291.933 176.898   1
   3   7  -3 557.795 129.476   9
   3   7  -2 170.698 161.776   1
   3   7  -2 137.238 51.3696  10
   3   7  -2 252.081 81.7388   9
   3   7  -1 29.3917 52.5369   1
   3   7  -1 62.7716 35.1153  10
   3   7  -1-1.41608 47.4103   9
   3   7   0 3.74127 5.95518  10
   3   7   0 88.0650 131.468   1
   3   7   1 16977.6 1221.65   1
  -3  -7  -1 16031.3 492.573   6
   3   7   2 1544.72 366.998   1
   3   7   2 1056.15 144.081  10
  -3  -7  -2 1613.65 165.519   6
   3   7   3 1983.75 187.343  10
  -3  -7  -3 1958.55 193.672   6
   3   7   4 1043.89 142.883  10
   3   7   4 1717.09 222.116   8
  -3  -7  -4 1047.40 146.581   6
   3   7   4 1649.69 397.642   1
   3   7   5 819.210 129.378  10
   3   7   5 1300.58 198.428   8
   3   7   5 1093.60 293.464   1
   3   7   6 795.461 126.782  10
   3   7   6 810.710 163.336   8
   3   7   6 641.156 226.910   1
   3   7   7 2203.31 277.780   8
   3   7   7 2653.43 242.555  10
   3   7   8 197.541 80.4884   8
   3   7   9 1224.53 188.467   8
   3   7  10 605.212 118.413   8
  -3  -7 -10 632.055 106.844  12
   3   7  11 802.524 130.488   8
   3   7  12 343.276 75.5968   8
   3   7  12 331.872 80.8255   4
   3   7  13 193.508 51.8865   4
   3   7  13 190.591 43.4391   8
   3   8 -12 695.172 111.406   9
   3   8 -11 41.8213 29.4558   9
   3   8 -10 9.31875 24.9280   9
   3   8  -9 266.296 85.0244   9
   3   8  -8 221.746 83.9754   9
   3   8  -7 859.311 129.604  10
   3   8  -7 1432.91 215.189   9
   3   8  -6 6024.51 363.700  10
   3   8  -6 8686.68 545.145   9
   3   8  -5 2627.96 248.819  10
   3   8  -5 3861.94 361.252   9
   3   8  -4 28.6968 28.7331  10
   3   8  -4-9.29127 53.5051   9
   3   8  -3 41.5617 124.512   1
   3   8  -3 201.954 70.6004  10
   3   8  -3 289.434 95.2647   9
   3   8  -2-37.9153 43.1046  10
   3   8  -2-17.0673 37.4940   1
   3   8  -1 4460.75 328.265  10
  -3  -8   1 3837.36 247.903   6
   3   8   0 10888.2 506.677  10
  -3  -8   0 9390.60 395.217   6
   3   8   1 4328.30 308.886  10
   3   8   1 3661.22 593.392   1
   3   8   2 813.277 131.816  10
   3   8   2 982.364 303.033   1
  -3  -8  -2 1320.09 154.887   6
   3   8   3 18.4698 100.336   1
   3   8   3-20.1306 38.9477  10
  -3  -8  -3 36.4142 7.36461   6
   3   8   4 309.843 83.7661  10
   3   8   4 330.882 101.481   8
  -3  -8  -4 307.114 85.7010   6
   3   8   5 20.4100 6.41119  10
   3   8   5 40.6609 41.1133   8
   3   8   6 7.41896 20.3556  10
   3   8   6 49.3137 56.0755   8
   3   8   7 1472.79 173.116  10
   3   8   7 1383.48 228.375   8
   3   8   8 1248.25 195.647   8
   3   8   9 164.268 62.8318   8
   3   8  10 1736.01 196.866   8
  -3  -8 -10 1806.13 174.817  12
   3   8  11 415.220 82.2251   8
   3   8  12 85.4313 28.0987   8
   3   8  12 1.02279 7.33979   4
   3   9 -11 550.358 84.2348   9
   3   9 -10 48.5742 18.0668   9
   3   9  -9 599.908 117.236   9
   3   9  -8 63.1765 27.5389   9
   3   9  -7 375.021 94.3594   9
   3   9  -7 286.000 69.3409  10
   3   9  -6 1104.59 143.310  10
   3   9  -6 1503.50 210.309   9
   3   9  -5 638.118 121.735  10
   3   9  -5 886.325 161.807   9
   3   9  -4-14.4889 19.2002  10
   3   9  -4-66.5340 59.7756   9
   3   9  -3 56.0486 47.9172  10
   3   9  -2 27.3404 26.7371  10
  -3  -9   1 5340.07 303.038   6
   3   9  -1 5988.45 387.607  10
   3   9   0 6849.52 413.143  10
  -3  -9   0 6310.10 340.614   6
   3   9   1 1388.31 177.578  10
  -3  -9  -1 1260.27 152.161   6
   3   9   2 11635.4 488.285  10
  -3  -9  -2 10961.3 471.642   6
   3   9   3 154.662 51.5760  10
   3   9   3 198.739 79.9884   8
  -3  -9  -3 182.338 65.7338   6
   3   9   4 9238.35 443.396  10
   3   9   4 9094.71 512.829   8
  -3  -9  -4 8247.79 421.295   6
   3   9   5 89.1948 45.4074  10
   3   9   5 58.5515 50.2119   8
   3   9   6 155.704 49.8417  10
   3   9   6 130.259 71.3582   8
   3   9   7 224.858 57.7763  10
   3   9   7 236.070 86.9608   8
   3   9   8 20.9829 27.7762   8
   3   9   9 127.810 51.7176   8
  -3  -9  -9 138.369 40.3890  12
   3   9  10 1037.07 135.842   8
  -3  -9 -10 973.251 111.497  12
   3   9  11 1258.40 124.877   8
   3  10  -8 741.702 103.896   5
   3  10  -7-23.9092 16.8790  10
   3  10  -6 239.922 60.5778  10
   3  10  -5 356.230 82.6370  10
   3  10  -4 852.380 135.614  10
   3  10  -3 3686.91 297.117  10
   3  10  -2 158.763 62.1439  10
   3  10  -1 21.9395 31.7854  10
  -3 -10   1 65.3330 37.0685   6
   3  10   0 539.107 109.327  10
  -3 -10   0 660.787 107.417   6
   3  10   1 993.535 144.427  10
   3  10   1 837.727 141.331   8
  -3 -10  -1 982.223 136.900   6
   3  10   2 340.582 82.3429  10
  -3 -10  -2 244.995 64.0410   6
   3  10   2 377.943 98.9540   8
   3  10   3 3124.02 249.028  10
  -3 -10  -3 2860.45 232.599   6
   3  10   3 3205.64 281.657   8
   3  10   4 12889.7 503.378  10
   3  10   4 13058.7 577.638   8
   3  10   5 983.128 138.001  10
   3  10   5 1078.80 165.116   8
   3  10   6 20.3534 26.7983  10
   3  10   6-58.4123 41.6826   8
   3  10   7 36.7508 43.3302   8
   3  10   8 432.147 95.7153   8
  -3 -10  -9 458.882 76.0055  12
   3  10   9 443.080 82.9992   8
   3  10  10 43.5965 21.0533   8
   3  11  -7 123.683 27.7168  10
   3  11  -7 259.621 52.7488   5
   3  11  -6 814.186 92.8160  10
   3  11  -5 128.186 35.7093  10
   3  11  -4 1005.43 124.289  10
   3  11  -3-3.25219 15.4509  10
   3  11  -2 11.5589 28.3676  10
   3  11  -1 76.9881 38.8842  10
  -3 -11   1 68.2851 34.8233   6
   3  11   0 21.9583 23.7148  10
  -3 -11   0 7.28452 18.4760   6
   3  11   0-31.0309 23.9865   8
   3  11   1 478.663 99.7725   8
   3  11   1 590.120 101.428  10
  -3 -11  -1 660.008 96.9003   6
   3  11   2 258.645 72.0294   8
   3  11   2 223.213 66.5622  10
   3  11   3 633.263 102.422  10
   3  11   3 604.343 108.566   8
   3  11   4 322.926 82.2979   8
   3  11   4 359.745 77.6980  10
   3  11   5 267.296 72.7408   8
   3  11   5 309.819 68.1313  10
   3  11   6 683.367 89.9265  10
   3  11   6 474.164 99.5463   8
   3  11   7 297.802 69.1076   8
   3  11   8 13.6646 20.8155   8
  -3 -11  -8-20.3591 18.4475  12
   3  12  -6 247.307 49.1606   5
   3  12  -5 710.385 77.7787  10
   3  12  -4 183.823 41.8151  10
   3  12  -3 8.91477 8.27164  10
   3  12  -2-3.07129 7.09798  10
   3  12  -1 275.862 63.0280  10
   3  12   0 9.36972 7.30563  10
   3  12   1 38.7678 29.6468   8
   3  12   1 104.687 40.0885  10
   3  12   2 211.314 52.9269   8
   3  12   2 177.876 48.1907  10
   3  12   3 426.705 74.2653  10
   3  12   3 359.217 67.3314   8
   3  12   4 1226.41 114.859  10
   3  12   4 1046.55 115.979   8
   3  12   5 402.933 68.1485   8
   3  12   6-3.30989 9.96761   8
  -3 -12  -6-15.8073 15.9923  12
   3  13  -2-14.8602 10.5454  10
   3  13  -1 6.81744 8.88062  10
   3  13   0 315.735 51.0320  10
   3  13   1 477.820 62.7273  10
   4 -14  -2-6.02738 15.3794   6
   4 -14  -1 127.297 36.6635   6
   4 -14   0 7.28808 8.46774   6
   4 -14   1 455.316 68.5417   6
  -4  14  -2 1287.73 106.550  10
   4 -14   2 1834.93 140.901   6
  -4  14  -3 25.0350 10.7105  10
   4 -14   3 57.6556 23.5420   6
  -4  14  -4 308.387 49.0208  10
   4 -14   4 534.496 68.7068   6
  -4  13   6-26.3467 26.7228   8
   4 -13  -4 280.035 57.2807   6
   4 -13  -4 282.103 68.1500  11
   4 -13  -3 74.1530 29.9548   6
   4 -13  -3 191.473 52.8322  11
   4 -13  -2 138.145 43.0081  11
   4 -13  -2 23.5949 7.98072   6
   4 -13  -1-3.60665 33.8189  11
   4 -13  -1 0.86702 12.2018   6
   4 -13   0 299.642 70.5573   6
   4 -13   0 395.312 68.8993  11
   4 -13   1 854.478 120.395   6
   4 -13   2 910.775 125.809   6
   4 -13   3 327.761 74.7818   6
   4 -13   4 374.697 71.8951   6
   4 -13   5 7.55368 10.1761   6
   4 -13   6 701.295 97.2190   6
   4 -13   7 26.2494 14.8248   6
   4 -12  -9 204.107 45.4018  12
   4 -12  -8-15.8504 21.0981  12
   4 -12  -7 116.080 42.0433  12
   4 -12  -6 5.00617 22.8809  12
   4 -12  -5 1035.91 177.166  11
   4 -12  -5 823.772 103.511   6
   4 -12  -4 180.830 52.2055   6
   4 -12  -4 174.610 74.4198  11
   4 -12  -3 14.0046 45.9001  11
   4 -12  -3-42.5642 36.1756   6
   4 -12  -2 184.059 60.8744   6
   4 -12  -2 197.936 62.3853  11
   4 -12  -1 69.7361 29.2629   6
   4 -12  -1 86.4168 20.9328  11
   4 -12   0 10.6631 20.5032   6
   4 -12   0-4.26056 8.48212  11
   4 -12   1 759.142 121.796   6
   4 -12   1 731.396 120.822  11
   4 -12   2 1354.21 175.111  11
   4 -12   2 1118.38 164.214   6
   4 -12   3 198.628 68.6115   6
   4 -12   3 186.655 61.3438  11
   4 -12   4 248.640 74.5859   6
   4 -12   5 1266.35 164.378   6
   4 -12   6 370.265 85.8138   6
   4 -12   7 17.9958 23.3826   6
   4 -12   8 8.09848 19.4121   6
   4 -12   9 47.0734 28.4272   6
   4 -11 -11 33.1054 16.2530  12
   4 -11 -10 62.7198 28.6472  12
   4 -11  -9 94.1523 40.4878  12
   4 -11  -8 46.5920 32.5465  12
   4 -11  -7 117.179 54.6228  12
   4 -11  -7-66.1994 141.308  11
   4 -11  -6 168.267 58.0896  12
   4 -11  -6 212.365 106.524  11
   4 -11  -5 239.945 59.6054   6
   4 -11  -5 240.281 70.8582  12
   4 -11  -5 338.606 89.4871  11
   4 -11  -4 76.7863 7.49006   6
   4 -11  -4 86.9382 39.0537  11
   4 -11  -3 80.8842 40.1351   6
   4 -11  -3 0.70883 18.9432  11
   4 -11  -2 107.703 55.5507   6
   4 -11  -2 120.370 62.3463  11
   4 -11  -1-38.0051 40.1432   6
   4 -11  -1-21.6928 19.5305  11
   4 -11   0 10.9361 38.4858   6
   4 -11   0 14.3235 26.4543  11
   4 -11   1-22.1181 39.0748  11
   4 -11   1 32.3725 29.6586   6
   4 -11   2 85.2163 49.3953   6
   4 -11   2 143.954 61.3646  11
   4 -11   3 1116.06 180.125  11
   4 -11   4 893.935 160.679   4
   4 -11   4 820.327 147.615  11
   4 -11   5 10611.4 554.972   4
   4 -11   5 10839.6 531.485  11
   4 -11   6 3913.76 303.483  11
   4 -11   6 3273.75 299.374   4
   4 -11   7 307.159 85.7830   4
   4 -11   8 23.8273 5.12829   4
   4 -11   9-8.15814 24.6042   4
   4 -11  10-4.29963 16.5686   4
   4 -11  11 717.993 87.1816   4
   4 -11  11 415.515 63.0514   6
   4 -10 -12 67.9911 30.8404  12
   4 -10 -11 40.6742 20.0640  12
   4 -10 -10 14.7278 22.7592  12
   4 -10  -9 40.6366 33.9212  12
   4 -10  -8-2.67142 5.06249  12
   4 -10  -7 8.26657 19.6843  12
   4 -10  -7 164.908 109.534  11
   4 -10  -6 410.420 97.1450  12
   4 -10  -6 613.797 171.048  11
   4 -10  -5 221.682 65.8915   6
   4 -10  -5 248.322 72.2624  12
   4 -10  -5 227.518 72.8275  11
   4 -10  -4 654.771 156.509  11
   4 -10  -4 614.307 106.595   6
   4 -10  -4 609.260 107.319  12
   4 -10  -3-56.4838 53.8191  11
   4 -10  -3 5.77153 9.19842   6
   4 -10  -2 222.179 56.3588   6
   4 -10  -2 246.395 90.5469  11
   4 -10  -1 328.590 85.0058   6
   4 -10  -1 317.277 99.5030  11
   4 -10   0 1051.75 158.982   6
   4 -10   0 865.504 167.221  11
   4 -10   1 512.968 104.009   6
   4 -10   1 470.356 123.417  11
   4 -10   2 107.706 57.3817   4
   4 -10   2 46.5601 42.8593  11
   4 -10   3 1800.86 230.415   4
   4 -10   3 1521.69 216.074  11
   4 -10   4 7119.28 483.553  11
   4 -10   4 6947.41 463.381   4
   4 -10   5 1826.29 234.866   4
   4 -10   5 1923.80 242.400  11
   4 -10   6 329.910 96.7318   4
   4 -10   6 394.804 110.273  11
   4 -10   7 3275.78 308.621  11
   4 -10   7 2984.14 298.575   4
   4 -10   8 679.412 133.263   4
   4 -10   8 794.387 141.661  11
   4 -10   9-1.65031 25.5895  11
   4 -10   9-19.5556 42.4268   4
   4 -10  10 256.166 74.6090   4
   4 -10  11 12.4369 22.6909   4
   4 -10  12 257.794 53.1453   4
   4  -9 -13 111.044 40.4723  12
   4  -9 -12 35.0185 24.4965  12
   4  -9 -11 9.88487 18.0187  12
   4  -9 -10 28.1066 22.6184  12
   4  -9  -9 1.71669 39.0887  12
   4  -9  -8-1.04767 62.9718  11
   4  -9  -8 45.0635 34.0041  12
   4  -9  -7 153.174 63.9171  12
   4  -9  -7 210.324 73.4560  11
   4  -9  -6 530.390 112.391  12
   4  -9  -6 637.729 132.899  11
   4  -9  -5 82.4048 101.870   7
   4  -9  -5 14.8070 31.0854  12
   4  -9  -5-10.7651 5.63666  11
   4  -9  -4 202.324 72.8300  11
   4  -9  -4 153.560 47.1400   6
   4  -9  -4 149.555 75.6999   7
   4  -9  -4 179.043 55.4647  12
   4  -9  -3 1301.54 205.750   7
   4  -9  -3 1277.50 205.670  11
   4  -9  -3 1880.10 191.558   6
   4  -9  -2 1029.97 144.498   6
   4  -9  -2 1101.07 184.574   7
   4  -9  -2 645.353 143.798  11
   4  -9  -1 2218.99 252.501   7
   4  -9  -1 2523.76 228.298   6
   4  -9   0 2158.16 259.966  11
   4  -9   1 3620.54 304.819   4
   4  -9   1 2000.47 247.889  11
   4  -9   2 611.250 128.893   4
   4  -9   2 358.922 104.337  11
   4  -9   3 3842.94 326.082   4
   4  -9   3 2383.95 276.283  11
   4  -9   4 4886.11 376.549   4
   4  -9   4 4904.43 409.742  11
   4  -9   5 90.6171 61.4924  11
   4  -9   5 12.1543 22.3410   4
   4  -9   6 324.214 102.261  11
   4  -9   6 247.871 78.9799   4
   4  -9   7 139.235 71.5500  11
   4  -9   7 123.248 75.3849   4
   4  -9   8 3456.25 337.894  11
   4  -9   8 2808.53 296.976   4
   4  -9   9 166.689 74.5649  11
   4  -9   9 222.192 77.3912   4
   4  -9  10 110.546 50.7259   4
   4  -9  10 94.8052 24.6473  11
   4  -9  11 395.622 93.4047  11
   4  -9  11 450.300 102.297   4
   4  -9  12 16.2232 25.3091   4
   4  -9  13-20.5848 12.7485   4
   4  -8 -14 37.6020 18.9697  12
   4  -8 -13 53.9798 28.4774  12
   4  -8 -12 23.6750 20.9544  12
   4  -8 -11 84.5396 42.2733  12
   4  -8 -10 177.244 72.6731  12
   4  -8  -9-27.9488 32.8929  12
   4  -8  -8 615.017 133.141  12
   4  -8  -8 669.091 167.717  11
   4  -8  -7-13.9228 29.5569  12
   4  -8  -7 110.646 80.5384  11
  -4   8   6 617.353 259.727   1
   4  -8  -6 507.553 135.447   7
   4  -8  -6 503.917 111.097  12
   4  -8  -6 477.288 104.961  11
   4  -8  -5 2833.95 315.510   7
  -4   8   5 4483.87 619.967   1
   4  -8  -5 4673.53 311.568  12
   4  -8  -5 2967.65 287.984  11
   4  -8  -4 231.054 80.5013   7
   4  -8  -4 243.882 86.2749  11
   4  -8  -4 421.876 84.8059  12
   4  -8  -3 2139.70 258.376   7
   4  -8  -3 2130.79 252.857  11
   4  -8  -2 32.8553 40.3185   7
   4  -8  -2 31.8970 29.4407  11
   4  -8  -1 13.3740 30.6519  11
   4  -8   0-10.9238 21.1552  11
   4  -8   1 163.038 76.9290  11
   4  -8   2 865.068 158.428  11
   4  -8   2 1196.22 172.906   4
   4  -8   3 209.631 87.8311  11
   4  -8   3 338.713 91.3016   4
   4  -8   4 4242.43 332.682   4
   4  -8   4 2522.76 289.352  11
   4  -8   5 36.5647 55.3320  11
   4  -8   5 31.4071 21.5681   4
   4  -8   6 537.288 125.084   4
   4  -8   6 638.800 142.031  11
   4  -8   7 699.391 150.903   4
   4  -8   7 665.064 164.594  11
   4  -8   8 1687.32 234.961   4
   4  -8   8 1841.54 266.219  11
   4  -8   9 63.0579 33.4291   4
   4  -8   9 16.1031 27.3649  11
   4  -8  10 61.5953 55.1554  11
   4  -8  10 96.3627 42.9734   4
   4  -8  11 59.5344 53.9706  11
   4  -8  11 39.4068 33.3951   4
   4  -8  12 27.4148 11.0525  11
   4  -8  12 38.1553 34.8120   4
   4  -8  13 16.3123 13.6663  11
   4  -8  13 16.7123 15.3640   4
   4  -8  14 235.374 50.0388   4
   4  -7 -14 466.253 83.7202  12
   4  -7 -13 370.067 90.6645  12
   4  -7 -12 163.689 65.3233  12
   4  -7 -11 4.56443 24.6588  12
   4  -7 -10 35.4544 26.1394  12
   4  -7  -9 94.9109 47.0540  12
   4  -7  -8 814.998 172.057  11
   4  -7  -8 774.557 152.438  12
  -4   7   7 3414.68 580.333   1
   4  -7  -7 3751.67 367.038   7
   4  -7  -7 3996.24 315.236  12
   4  -7  -7 4124.16 350.155  11
  -4   7   6 3756.84 591.874   1
   4  -7  -6 2652.03 290.444   7
   4  -7  -6 4230.97 301.845  12
   4  -7  -6 2710.93 277.119  11
  -4   7   5-6.26482 57.7247   1
   4  -7  -5 50.5212 31.8661  11
   4  -7  -5 52.2229 28.6310   7
   4  -7  -5 120.406 46.4463  12
   4  -7  -4 2484.76 261.649   7
   4  -7  -4 2637.36 257.180  11
  -4   7   3 1435.19 314.453   1
   4  -7   1-3.20148 36.9455   3
   4  -7   2 203.184 99.1918   3
   4  -7   4 12.1637 3.80221  11
   4  -7   5 491.747 99.2742   4
   4  -7   6 58.3005 31.8524   4
   4  -7   7 180.396 59.5487   4
   4  -7   8 3032.50 312.490   4
   4  -7   9 3791.82 357.414   4
   4  -7  10 569.978 138.542   4
   4  -7  11 250.460 92.3778   4
   4  -7  12 19.2727 25.1324   4
   4  -7  13 181.671 75.6560  11
   4  -7  13 280.125 80.5018   4
   4  -7  14 109.417 35.0283  11
   4  -7  14 232.915 59.9064   4
   4  -6 -15 11.8826 9.84342  12
   4  -6 -14 537.818 99.5716  12
   4  -6 -13 161.440 58.5017  12
   4  -6 -12 498.064 121.969  12
   4  -6 -11 57.9565 28.2710  12
   4  -6 -10 105.469 57.9585  12
   4  -6  -9 518.902 131.804  12
   4  -6  -8 1089.35 189.377   7
   4  -6  -8 1312.09 187.008  12
  -4   6   8 770.189 259.597   1
   4  -6  -8 1126.53 186.345  11
   4  -6  -7 931.362 165.952   7
  -4   6   7 672.681 247.889   1
   4  -6  -7 835.626 140.097  12
   4  -6  -7 339.646 105.248  11
   4  -6  -6-16.4830 30.5088   7
  -4   6   6 84.0907 111.643   1
   4  -6  -6-10.9297 16.4200  12
   4  -6  -6-3.51548 34.2401  11
  -4   6   5-57.4682 136.181   1
  -4   6   4 119.679 77.0801   1
  -4   6   3 3095.70 413.567   1
   4  -6  -2 52.0768 92.5897   3
  -4   6   2-172.069 92.7938   1
   4  -6  -1 549.353 212.897   3
   4  -6   0 3088.32 518.902   3
   4  -6   1 4879.71 634.138   3
   4  -6   2 603.405 217.047   3
   4  -6   3 15744.9 1129.16   3
   4  -6   4 5313.51 639.680   3
   4  -6   5 171.281 104.805   3
   4  -6   6 1031.59 153.913   8
   4  -6   6 1757.48 201.190   4
   4  -6   7 543.101 114.253   8
   4  -6   7 937.219 153.118   4
   4  -6   8 138.794 57.3152   8
   4  -6   8 176.667 70.6073   4
   4  -6   9 5910.29 393.677   8
   4  -6   9 4632.82 369.626   4
   4  -6  10 1223.10 189.927   4
   4  -6  10 1595.57 201.853   8
   4  -6  11-23.3201 46.1274   4
   4  -6  12 36.3655 35.5222   4
   4  -6  13 31.3277 36.7164   4
   4  -6  14 9.75328 7.64955   4
   4  -6  15-17.2853 18.7141   4
   4  -5 -15 40.7336 21.5072  12
   4  -5 -14 78.9868 38.1087  12
   4  -5 -13-32.4067 27.3066  12
   4  -5 -12 266.754 95.3734  12
   4  -5 -11 1218.23 194.361  12
   4  -5 -10 278.451 92.0291  12
  -4   5   9-2.35856 182.587   1
   4  -5  -9 205.858 67.2799  12
  -4   5   8 297.748 220.769   1
   4  -5  -8 290.174 102.606   7
   4  -5  -8 182.802 61.5100  12
   4  -5  -8 288.745 85.6945  11
   4  -5  -7 68.9517 34.4256  11
  -4   5   7 145.656 124.554   1
   4  -5  -7 166.837 64.9057   7
   4  -5  -7 61.8364 53.2187  12
  -4   5   6-102.788 88.8218   1
  -4   5   5 17991.0 1105.59   1
   4  -5  -4 201931. 3925.64   3
  -4   5   4 215846. 3422.28   1
   4  -5  -3 81264.2 2515.97   3
  -4   5   3 89694.7 2015.92   1
  -4   5   2 49.8685 65.0286   1
   4  -5  -2-48.5471 117.965   3
   4  -5  -1 20328.2 1224.36   3
  -4   5   1 22656.5 869.273   1
   4  -5   0 1683.83 369.168   3
   4  -5   1 1367.50 312.735   3
   4  -5   2 6938.85 695.155   3
   4  -5   3 17942.0 1123.16   3
   4  -5   4 2609.30 432.305   3
   4  -5   5 1249.47 294.316   3
   4  -5   7 101.811 44.2843   8
   4  -5   7 111.064 44.5156   4
   4  -5   8 11.8597 16.2886   8
   4  -5   8 73.8385 43.6452   4
   4  -5   9 1137.33 169.221   8
   4  -5   9 777.449 141.728   4
   4  -5  10 1060.88 174.299   4
   4  -5  10 1017.63 157.863   8
   4  -5  11 2148.50 231.076   8
   4  -5  11 1747.45 225.805   4
   4  -5  12 703.584 126.555   8
   4  -5  12 496.636 114.473   4
   4  -5  13-9.26171 32.4444   4
   4  -5  14 277.872 78.3347   4
   4  -5  15 33.0850 25.9621   4
   4  -4 -15 15.0520 23.4118  12
   4  -4 -14 336.659 87.3802  12
   4  -4 -13 68.2369 55.7410  12
   4  -4 -12 280.625 101.251  12
   4  -4 -11 12.9366 7.19414  12
   4  -4 -10 1113.42 180.386  12
   4  -4  -9 1733.50 218.547  12
   4  -4  -9 2115.65 436.409   2
   4  -4  -8 1255.88 171.882  11
   4  -4  -8 740.007 224.349   2
   4  -4  -8 1376.76 185.620   7
   4  -4  -8 896.391 144.794  12
   4  -4  -7 111.407 99.1823   2
   4  -4  -6 173.496 118.172   2
   4  -4  -5 10901.2 845.725   3
   4  -4  -5 8935.46 689.385   2
   4  -4  -4 15255.3 1009.23   3
  -4   4   3 103.798 56.7923   1
   4  -4  -3 42.7306 54.3036   3
   4  -4  -2 10559.1 808.260   3
  -4   4   2 10959.7 585.159   1
   4  -4  -1 10853.3 812.080   3
  -4   4   1 11619.9 531.980   1
   4  -4   0 337.648 162.096   3
   4  -4   1 24435.4 1202.30   3
   4  -4   2 9003.58 723.673   3
   4  -4   3 353.897 148.196   3
   4  -4   4 6347.25 612.120   3
   4  -4   5 947.720 228.951   3
   4  -4   8 782.267 136.521   8
   4  -4   8 1324.56 167.418   4
   4  -4   9 1194.39 171.396   8
   4  -4   9 1563.14 194.623   4
   4  -4  10 10.2159 24.1299   4
   4  -4  10 29.1283 24.5155   8
   4  -4  11 483.034 106.884   8
   4  -4  11 334.561 98.0737   4
   4  -4  12-10.6338 28.9185   8
   4  -4  12 9.42578 14.3282   4
   4  -4  13 1.30298 13.3547   4
   4  -4  14 4.42723 16.4675   4
   4  -4  15-28.7135 25.0642   4
   4  -3 -15-44.3602 34.8701  12
   4  -3 -14 30.4481 27.1697  12
   4  -3 -13 1028.74 173.392  12
   4  -3 -12 66.8489 54.1058  12
   4  -3 -11 502.282 123.230  12
   4  -3 -10 1748.08 428.581   2
   4  -3 -10 2495.82 270.493  12
   4  -3  -9 386.991 179.151   2
   4  -3  -9 470.854 111.560  12
   4  -3  -8 428.602 173.083   2
   4  -3  -8 263.485 76.4062  12
   4  -3  -7-55.9824 65.2909   2
   4  -3  -6 920.751 216.889   3
   4  -3  -6 831.923 216.929   2
   4  -3  -5 1493.61 289.220   3
   4  -3  -5 1124.46 239.718   2
   4  -3  -4 16305.3 966.612   3
   4  -3  -4 12923.9 708.390   2
   4  -3  -3 266.211 126.705   3
   4  -3  -3 156.813 62.6269   2
   4  -3  -2 7159.40 608.450   3
   4  -3  -1 276.955 115.199   3
  -4   3   1 429.129 89.6005   1
   4  -3   0 6181.82 541.627   3
   4  -3   1 4418.38 452.603   3
   4  -3   2 5323.88 497.832   3
   4  -3   3 936.365 209.730   3
   4  -3   4 8798.00 650.912   3
   4  -3   5 30391.7 1235.79   3
   4  -3   6 218.890 111.948   3
   4  -3   8 945.852 143.471   8
   4  -3   9 259.776 87.2144   8
   4  -3   9 367.792 84.7686   4
   4  -3  10 5918.18 396.423   8
   4  -3  10 5033.31 365.635   4
   4  -3  11 80.1368 55.7684   8
   4  -3  11 32.4914 40.3924   4
   4  -3  12 34.9678 40.9184   4
   4  -3  12-5.73330 14.3366   8
   4  -3  13 99.9802 44.5557   4
   4  -3  14 362.605 92.1246   4
   4  -3  15-10.6900 6.41375   4
   4  -3  16 722.458 94.0125   4
   4  -2 -15 297.268 71.7119  12
   4  -2 -14-13.6568 12.6857   9
   4  -2 -14 114.788 61.2387  12
   4  -2 -13-4.81880 19.9073   9
   4  -2 -13 55.8758 39.1955  12
   4  -2 -12 1395.25 206.015  12
   4  -2 -11 187.834 75.3142  12
   4  -2 -10 459.689 119.577   2
   4  -2 -10 482.378 115.599  12
   4  -2  -9 205.707 132.657   2
   4  -2  -9 159.841 62.4916  12
   4  -2  -8 105.055 123.250   2
   4  -2  -7 932.161 280.012   2
   4  -2  -6 20.9016 54.1416   2
   4  -2  -5 12835.3 790.813   3
   4  -2  -5 12131.8 768.492   2
   4  -2  -4 306.942 117.049   2
   4  -2  -4 419.847 139.675   3
   4  -2  -3 3167.66 366.711   3
   4  -2  -3 2666.38 265.805   2
   4  -2  -2 4611.18 436.666   3
   4  -2  -2 4109.87 267.327   2
   4  -2  -1 10897.2 682.639   3
   4  -2   0 326.006 120.241   3
   4  -2   1 96.3414 55.2668   3
   4  -2   2 2421.85 331.533   3
   4  -2   3 804.983 195.910   3
   4  -2   4 108.380 78.3888   3
   4  -2   5 426.069 154.505   3
   4  -2   6 15303.9 874.006   3
   4  -2   9 809.151 135.285   4
   4  -2   9 613.319 127.081   8
   4  -2  10 2632.71 268.365   8
   4  -2  10 2566.48 251.742   4
   4  -2  11 367.760 96.9175   8
   4  -2  11 299.613 85.6544   4
   4  -2  12 1290.47 191.873   4
   4  -2  12 1395.16 185.709   8
   4  -2  13 32.9913 30.1181   8
   4  -2  13 58.6880 40.1983   4
   4  -2  14 201.001 68.9537   4
   4  -2  15 158.881 54.8216   4
   4  -2  16 38.0183 22.9716   4
   4  -1 -15 42.1051 24.9036   9
   4  -1 -15 46.7842 30.7744  12
   4  -1 -14 53.0851 15.4190   9
   4  -1 -14-42.9609 38.8644  12
   4  -1 -13 41.9363 33.6991   9
   4  -1 -13 31.5995 29.6553  12
   4  -1 -12 693.622 138.576   9
   4  -1 -12 716.011 144.298  12
   4  -1 -11 1136.00 184.046  12
   4  -1 -10 35.2827 47.8469   2
   4  -1 -10 60.6384 23.9793  12
   4  -1  -9 524.923 230.848   2
   4  -1  -9 312.662 89.3170  12
   4  -1  -8 55.9153 82.2862   2
   4  -1  -7 551.186 197.104   2
   4  -1  -6 834.571 225.344   2
   4  -1  -5 640.170 165.828   2
   4  -1  -5 661.214 151.950   3
   4  -1  -4 3140.08 342.476   3
   4  -1  -4 3105.94 343.768   2
   4  -1  -3 683.101 159.763   3
   4  -1  -3 647.643 129.797   2
   4  -1  -2 670.556 169.128   3
   4  -1  -2 557.446 105.965   2
   4  -1  -1 651.884 155.535   3
   4  -1  -1 584.435 84.4485   2
   4  -1   0 738.338 169.640   3
   4  -1   0 501.894 55.5590   2
   4  -1   1 16828.5 784.308   3
   4  -1   2 1304.31 218.475   3
   4  -1   3 90.9781 76.7643   3
   4  -1   4 209.163 97.1805   3
   4  -1   5 415.360 136.641   3
   4  -1   6 3.87413 50.6407   3
  -4   1  -7 2553.61 379.424   2
   4  -1   9 2213.70 235.126   8
   4  -1   9 2826.20 253.159   4
   4  -1  10 678.789 131.219   8
   4  -1  10 940.878 155.106   4
   4  -1  11 237.903 81.8670   8
   4  -1  11 204.076 76.1560   4
   4  -1  12 35.3552 41.8001   8
   4  -1  12-1.63814 43.4777   4
   4  -1  13 576.279 111.630   8
   4  -1  13 538.323 117.384   4
   4  -1  14 91.8248 45.4713   4
   4  -1  15 3.91636 4.88423   4
   4  -1  16 163.901 41.4630   4
   4   0 -16 58.3001 30.0494   9
   4   0 -15 522.812 97.9029   9
   4   0 -15 590.122 95.5107  12
   4   0 -14 1811.33 202.727   9
   4   0 -14 2186.74 224.731  12
   4   0 -13 302.629 91.0418   9
   4   0 -13 324.408 93.1156  12
   4   0 -12 422.803 113.018  12
   4   0 -12 329.618 98.6060   9
   4   0 -11 783.890 149.608   9
   4   0 -11 928.808 168.155  12
   4   0 -10 103.111 72.9578   2
   4   0 -10 8.70413 22.6520  12
   4   0  -9 964.765 325.151   2
   4   0  -9 576.430 129.337  12
   4   0  -8-45.4945 60.9337   2
   4   0  -7 13910.8 1027.59   2
   4   0  -6 44978.6 1676.04   2
   4   0  -5 1279.47 199.828   3
   4   0  -5 986.716 218.399   2
   4   0  -4 2451.44 292.878   3
   4   0  -4 2225.57 303.975   2
   4   0  -3 1243.50 208.259   3
   4   0  -3 902.210 157.166   2
   4   0  -2 874.594 158.220   2
   4   0  -2 877.416 169.491   3
   4   0  -1 133.395 69.6766   3
   4   0   0 13278.3 725.085   3
   4   0   1 2199.48 302.257   3
   4   0   1 2154.99 177.184   1
   4   0   2 4646.39 451.505   3
   4   0   2 4338.42 212.056   1
   4   0   3 2602.18 347.104   3
   4   0   4 817.870 194.441   3
   4   0   5 1061.40 218.958   3
   4   0   6 9240.51 678.434   3
   4   0   7 286.548 121.427   3
   4   0   9 109.562 53.4883   8
   4   0   9 113.475 52.6638   4
   4   0  10 7032.35 437.272   8
   4   0  10 9436.66 497.402   4
   4   0  11 1309.39 190.904   8
   4   0  11 1209.07 184.577   4
   4   0  12 775.836 150.954   8
   4   0  12 562.913 122.742   4
   4   0  13 21.1038 23.4768   8
   4   0  13 29.1441 28.1725   4
   4   0  14 63.3208 37.3659   4
   4   0  15-4.84457 31.1716   4
   4   0  16 44.2225 22.0953   4
   4   1 -16 23.4250 16.6535   9
   4   1 -15 250.523 71.2077   9
   4   1 -14 494.044 113.824   9
   4   1 -14 622.037 115.009  12
   4   1 -13 13396.5 610.810   9
   4   1 -13 15411.7 642.172  12
   4   1 -12 2890.57 292.671   9
   4   1 -12 3470.63 320.649  12
   4   1 -11 303.459 97.5434   9
   4   1 -11 313.696 100.250  12
   4   1 -10 1106.65 360.969   2
   4   1 -10 1052.22 169.780   9
   4   1 -10 749.085 144.239  12
   4   1  -9 296.970 168.695   2
   4   1  -9 480.921 111.142   9
   4   1  -9 298.700 85.9909  12
   4   1  -8 281.793 156.768   2
   4   1  -8 277.970 81.5285  12
   4   1  -7 3845.24 549.214   2
   4   1  -6 11869.4 890.406   2
   4   1  -5-22.9798 34.8528   2
   4   1  -4 1017.27 182.276   3
   4   1  -4 770.057 173.213   2
   4   1  -3 44.6649 25.7923   3
   4   1  -3 135.622 79.3724   2
   4   1  -2 95.2145 51.2338   3
   4   1  -1 16815.5 828.738   3
   4   1  -1 16609.9 724.474   1
   4   1   0 10138.5 525.840   1
   4   1   1 93695.9 1496.00   1
   4   1   2 86477.4 1395.30   1
   4   1   3 199.452 69.6845   1
   4   1   6 43.9579 40.0914   3
   4   1   7 5.70640 14.6439   3
   4   1   8 2612.98 240.451   8
   4   1   9 760.506 139.428   8
   4   1   9 1173.72 171.561   4
   4   1   9 1112.99 150.200  10
   4   1  10 25336.9 859.567   8
   4   1  10 30260.5 903.626   4
   4   1  11 20241.9 770.486   8
   4   1  11 17008.1 700.303   4
   4   1  12 1446.25 198.024   8
   4   1  12 1244.61 184.367   4
   4   1  13 148.680 58.7528   4
   4   1  13 224.993 75.9101   8
   4   1  14 32.2219 19.4142   8
   4   1  14 11.8381 17.8927   4
   4   1  15 179.687 51.1106   4
   4   1  16 71.5455 24.3993   4
   4   2 -16 180.265 45.0909   9
   4   2 -15 52.5570 33.9940   9
   4   2 -14 582.039 108.878  12
   4   2 -14 397.367 101.303   9
   4   2 -13 1972.54 238.335   9
   4   2 -13 2311.85 246.055  12
   4   2 -12 3392.93 316.618  12
   4   2 -12 3131.44 307.380   9
   4   2 -11 323.966 100.462   9
   4   2 -11 276.624 89.5736  12
   4   2 -10 813.691 316.443   2
   4   2 -10 702.577 142.472   9
   4   2 -10 795.893 150.778  12
   4   2  -9 364.562 105.681  12
   4   2  -9 449.500 265.614   2
   4   2  -9 459.298 110.362   9
   4   2  -8 1314.67 183.841  12
   4   2  -8 1114.58 163.615   9
   4   2  -7 451.068 208.158   2
   4   2  -6 1117.24 278.478   2
   4   2  -5 65.9837 78.1913   2
   4   2  -4 126.147 59.2601   3
   4   2  -4 120.388 92.6218   2
   4   2  -3 7318.26 543.152   3
   4   2  -2 1839.36 280.535   1
   4   2  -1 42140.5 1299.38   1
   4   2   0 431.762 161.804   1
   4   2   1 16047.1 748.829   1
   4   2   2 1479.49 230.678   1
   4   2   3 22916.2 935.767   1
   4   2   4 11202.4 641.646   1
   4   2   5 3882.75 393.963   1
   4   2   8 188.014 62.2512  10
   4   2   8 123.264 60.0668   8
   4   2   9 4486.16 299.295  10
   4   2   9 2858.85 267.553   8
   4   2  10 8258.56 476.968   8
   4   2  10 7776.54 466.243   4
   4   2  11 5687.45 404.834   8
   4   2  11 4696.32 366.717   4
   4   2  12 7005.40 440.290   8
   4   2  12 5554.89 396.887   4
   4   2  13 107.928 51.1764   8
   4   2  13 97.4198 54.7370   4
   4   2  14-0.26611 21.3651   8
   4   2  14 12.4311 24.0918   4
   4   2  15 68.5375 26.7339   4
   4   3 -15 71.2264 37.0309   9
   4   3 -14-36.0244 31.0617   9
   4   3 -13 458.713 112.941   9
   4   3 -13 506.951 111.492  12
   4   3 -12 69.9567 34.9242   9
   4   3 -12 25.3051 28.2055  12
   4   3 -11 9531.98 556.688   9
   4   3 -11 10155.3 570.795  12
   4   3 -10-12.7736 34.5282   9
   4   3 -10-12.2558 17.2495  12
   4   3  -9 1172.03 395.031   2
   4   3  -9 1052.59 170.953   9
   4   3  -9 836.157 157.642  12
   4   3  -8 746.012 109.759   5
   4   3  -8 417.902 102.498   9
   4   3  -8 456.797 113.762  12
   4   3  -8 732.334 251.164   2
   4   3  -7 219.744 72.4545   9
   4   3  -7 204.957 64.0047  12
   4   3  -7 329.116 172.799   2
   4   3  -6 310.036 155.466   2
   4   3  -5 438.022 177.518   2
   4   3  -4 307.237 105.034   3
   4   3  -3 2629.68 395.203   1
   4   3  -2 25097.0 1174.52   1
   4   3  -1 6227.02 550.118   1
   4   3   0 18002.4 910.834   1
   4   3   1 555.032 166.089   1
   4   3   2 940.794 218.273   1
   4   3   3 391.633 140.767   1
   4   3   4 368.032 111.769   1
   4   3   5 1679.55 285.862   1
   4   3   7 180.295 64.9840  10
   4   3   7 44.2159 35.1322   8
   4   3   8 79.4719 7.67647  10
   4   3   8 26.6512 14.8585   8
   4   3   9 983.121 135.547  10
   4   3   9 563.706 128.339   8
   4   3  10 121.159 44.2203   8
   4   3  11 4257.62 348.454   8
   4   3  11 3662.35 327.638   4
   4   3  12 284.636 94.9153   8
   4   3  12 227.889 77.9372   4
   4   3  13 214.444 68.2608   8
   4   3  13 145.783 60.2175   4
   4   3  14 168.957 48.3929   8
   4   3  14 133.592 55.0131   4
   4   3  15 24.9704 23.4845   4
   4   4 -15 317.390 68.9642   9
   4   4 -14 13.9626 19.5276   9
   4   4 -13 71.3950 46.7150   9
   4   4 -12 2303.12 269.992   9
   4   4 -12 2483.41 259.372  12
   4   4 -11 403.672 109.937   9
   4   4 -11 508.377 127.640  12
   4   4 -10 4767.99 397.388   9
   4   4 -10 5030.30 412.541  12
   4   4  -9 11.7406 30.4082   9
   4   4  -9 81.6603 50.5113  12
   4   4  -8 8175.07 382.619   5
   4   4  -8 8029.65 498.414   9
   4   4  -8 5380.81 745.442   2
   4   4  -8 5106.29 408.163  12
   4   4  -7 8.34862 98.0426   2
   4   4  -7 102.719 41.7605   9
   4   4  -7 57.9145 22.3729  12
   4   4  -6 1343.77 187.501   9
   4   4  -6 1367.13 197.903  12
   4   4  -5 902.363 286.335   2
   4   4  -4 2516.06 434.372   1
   4   4  -3 2204.18 390.713   1
   4   4  -2 138.920 112.084   1
   4   4  -1 15379.3 970.287   1
   4   4   0 178.860 133.269   1
   4   4   1 652.918 196.933   1
   4   4   2 834.642 233.487   1
   4   4   3 485.198 166.035   1
   4   4   4 43.8302 14.8353   1
   4   4   5 1556.95 310.187   1
   4   4   6 1296.43 154.353  10
   4   4   6 811.474 141.029   8
   4   4   7 17.3181 38.7192  10
   4   4   7-0.94050 24.6158   8
   4   4   8 778.466 128.157  10
   4   4   8 345.213 89.2552   8
   4   4   9 241.421 78.8239  10
   4   4   9 179.454 69.5494   8
   4   4  10 1712.32 215.479   8
   4   4  11 629.098 130.772   8
   4   4  11 600.973 127.308   4
   4   4  12 85.9364 51.2699   8
   4   4  12 24.0651 12.7393   4
   4   4  13 47.8024 30.1446   8
   4   4  13 67.4005 39.5602   4
   4   4  14 66.0603 30.2100   8
   4   4  14 54.3993 27.5196   4
   4   5 -14 27.6502 20.0586   9
   4   5 -13 145.342 55.1295   9
   4   5 -12 5.66831 38.8615   9
   4   5 -11 519.720 132.789   9
   4   5 -10 89.4933 50.7976   9
   4   5  -9 3768.94 365.688  12
   4   5  -9 3912.97 374.380   9
   4   5  -8 1953.51 192.408   5
   4   5  -8 1990.40 265.567  12
   4   5  -8 1905.91 250.741   9
   4   5  -7 121.758 96.1957   2
   4   5  -7 55.6292 49.3365   9
   4   5  -7 63.8397 32.9830  12
   4   5  -6 3696.46 332.772   9
   4   5  -6 3636.58 351.348  12
   4   5  -5 55.6484 25.7349   9
   4   5  -5 63.5348 35.4254   2
   4   5  -5 37.5732 24.3940  12
   4   5  -4 1012.93 164.985   9
   4   5  -4 1481.77 358.699   1
   4   5  -3 4695.25 623.099   1
   4   5  -2 3281.45 503.660   1
   4   5  -1 514.501 201.522   1
   4   5   0 46.3379 97.1225   1
   4   5   1 5609.19 620.671   1
   4   5   2 5502.55 621.743   1
   4   5   3 3440.69 499.102   1
   4   5   4 24.1533 32.8523  10
   4   5   4-14.9342 38.4073   8
   4   5   4-69.8368 51.9297   1
   4   5   5 155.593 54.9813  10
   4   5   5 165.916 65.4326   8
   4   5   5 290.081 110.225   1
   4   5   6-9.29980 30.2657  10
   4   5   6-10.7848 33.8630   8
   4   5   7 290.160 86.9613  10
   4   5   7 260.027 82.8291   8
   4   5   8 264.911 78.4291  10
   4   5   8 216.048 88.8187   8
   4   5   9 30.4706 33.5588  10
   4   5   9 64.5092 54.4346   8
   4   5  10 61.9563 26.8216   8
   4   5  11 18.2470 21.7572   8
   4   5  12 261.284 72.0936   4
   4   5  12 312.404 74.4389   8
   4   5  13 137.879 45.5828   8
   4   5  13 124.122 46.0573   4
   4   5  14 40.8155 22.5255   4
   4   6 -14 146.236 38.7833   9
   4   6 -13 378.363 88.5427   9
   4   6 -12 143.907 62.0261   9
   4   6 -11 101.814 54.7230   9
   4   6 -10 259.026 90.8213   9
   4   6  -9 1298.11 216.576   9
   4   6  -9 1228.96 145.529   5
   4   6  -8 347.044 110.379   9
   4   6  -8 260.458 70.7558   5
   4   6  -7 3023.84 322.250   9
   4   6  -6 140.481 64.3296   9
   4   6  -6 168.053 150.807   2
   4   6  -5 4629.81 303.040  10
   4   6  -5 3835.23 360.754   9
   4   6  -5 4163.60 697.491   2
   4   6  -4 6188.87 350.066  10
   4   6  -4 5281.67 723.883   1
   4   6  -3 1318.92 162.281  10
   4   6  -3 732.960 150.421   9
   4   6  -3 905.034 286.522   1
   4   6  -2 415.684 108.542  10
   4   6  -2 282.447 95.1775   9
   4   6  -2 334.675 167.282   1
   4   6  -1 235.754 68.3409  10
   4   6  -1 200.266 74.8872   9
   4   6  -1 198.883 145.536   1
   4   6   0-50.5423 49.2555   1
   4   6   0 27.6856 31.1132  10
   4   6   1 651.368 108.364  10
   4   6   1 1116.26 293.230   1
   4   6   2 121.091 43.3003  10
   4   6   2 215.828 90.2738   1
   4   6   3 798.104 126.058  10
   4   6   3 1349.76 176.003   8
  -4  -6  -3 1309.96 140.279   6
   4   6   3 1604.18 362.562   1
   4   6   4 1311.36 161.415  10
   4   6   4 2036.40 227.430   8
   4   6   4 1893.12 383.962   1
   4   6   5 54.7560 13.3434  10
   4   6   5 99.6469 34.0584   8
   4   6   6 140.698 60.5931   8
   4   6   6 229.711 76.9187  10
   4   6   7-26.9714 40.3518  10
   4   6   7 12.2483 30.4062   8
   4   6   8 11.0625 29.1710  10
   4   6   8-11.6539 37.9215   8
   4   6   9 276.936 70.1241  10
   4   6   9 264.184 82.1377   8
   4   6  10-13.6182 38.0733   8
   4   6  11 525.244 109.624   8
   4   6  12-23.2996 9.60694   4
   4   6  12-22.1444 21.9655   8
   4   6  13 66.3931 28.5678   8
   4   6  13-15.1291 16.2733   4
   4   7 -13 160.947 51.0994   9
   4   7 -12 66.8146 45.5960   9
   4   7 -11 14.7188 15.7581   9
   4   7 -10 105.588 64.0971   9
   4   7  -9-19.6175 52.7654   9
   4   7  -9 18.7065 29.9972   5
   4   7  -8 564.918 102.603   5
   4   7  -8 813.986 174.316   9
   4   7  -7 364.417 109.300   9
   4   7  -6 1239.24 209.644   9
   4   7  -5 39.9703 32.7425  10
   4   7  -5 134.841 81.2066   9
   4   7  -4 54.2058 42.1103  10
   4   7  -4 109.229 54.2400   9
   4   7  -4-9.29876 119.905   1
   4   7  -3 222.491 74.2844  10
   4   7  -3 93.8312 55.6972   9
   4   7  -3 54.1419 59.1682   1
   4   7  -2 1025.98 155.324  10
   4   7  -2 586.081 136.233   9
   4   7  -2 459.106 219.682   1
   4   7  -1 1761.25 191.495  10
   4   7  -1 1197.13 337.685   1
   4   7   0 19741.8 636.493  10
   4   7   0 18374.4 1312.60   1
   4   7   1 42438.4 906.019  10
   4   7   1 43016.3 1975.78   1
   4   7   1 42587.1 943.783   8
   4   7   2 5115.62 314.222  10
   4   7   2 6112.12 374.021   8
   4   7   2 5573.66 692.590   1
  -4  -7  -2 5661.83 309.722   6
   4   7   3 2925.51 497.765   1
   4   7   3 1833.21 195.556  10
   4   7   3 2784.42 266.538   8
  -4  -7  -3 2886.01 227.600   6
   4   7   4 56.9652 25.7640  10
   4   7   4 24.1190 40.2180   8
   4   7   5 781.439 133.399  10
   4   7   5 660.786 145.284   8
   4   7   6 1489.45 191.187  10
   4   7   6 1514.44 220.696   8
   4   7   7 1427.61 209.720   8
   4   7   7 1688.56 194.553  10
   4   7   8 1554.70 179.680  10
   4   7   8 1233.20 188.853   8
   4   7   9 988.834 158.778   8
   4   7  10 24.5873 28.4095   8
   4   7  11 16.8141 28.1402   8
   4   7  12 205.530 56.3686   8
   4   7  12 130.956 40.6500   4
   4   8 -12 504.573 78.2831   9
   4   8 -11 18.1759 32.6346   9
   4   8 -10-29.1305 39.2517   9
   4   8  -9 384.273 99.3408   9
   4   8  -9 338.663 70.7901   5
   4   8  -8-29.8755 29.3013   9
   4   8  -8 13.7601 21.8440   5
   4   8  -7 622.966 149.371   9
   4   8  -6 673.352 105.446  10
   4   8  -6 956.953 184.787   9
   4   8  -5 5299.29 335.564  10
   4   8  -5 7309.90 511.370   9
   4   8  -4 2471.43 294.339   9
   4   8  -4 2200.22 223.261  10
   4   8  -3 2575.62 300.047   9
   4   8  -3 2147.07 237.909  10
   4   8  -2 12.9617 15.9686  10
   4   8  -1 11372.2 501.782  10
   4   8   0 7251.29 391.688  10
   4   8   1 21225.2 660.051  10
   4   8   1 21257.3 690.090   8
  -4  -8  -1 20505.2 594.401   6
   4   8   2 14759.8 557.138  10
   4   8   2 14705.1 598.334   8
  -4  -8  -2 13860.0 496.724   6
   4   8   3 7784.60 418.324  10
   4   8   3 7663.55 450.302   8
   4   8   4 794.683 133.258  10
   4   8   4 960.480 159.229   8
   4   8   5 4360.67 320.333  10
   4   8   5 4513.51 361.519   8
   4   8   6 896.507 137.986  10
   4   8   6 774.455 165.233   8
   4   8   7 348.085 82.9086  10
   4   8   7 385.775 102.675   8
   4   8   8 483.622 91.8317  10
   4   8   8 455.404 102.366   8
   4   8   9 159.837 54.5733   8
  -4  -8  -9 168.805 54.1626  12
   4   8  10 1908.02 188.127   8
   4   8  11 42.6821 21.6800   8
   4   8  11 62.9887 23.8361   4
   4   9  -9 55.7771 29.4321   9
   4   9  -8 138.544 59.4645   9
   4   9  -8 103.621 35.3269   5
   4   9  -7 393.503 101.145   9
   4   9  -6 172.107 48.9665  10
   4   9  -6 361.832 108.822   9
   4   9  -5 800.369 115.879  10
   4   9  -4 45.0061 25.6080  10
   4   9  -3 703.711 121.937  10
   4   9  -2 514.893 103.032  10
   4   9  -1 844.231 137.701  10
   4   9   0 909.008 135.588  10
   4   9   1 848.076 140.290   8
  -4  -9  -1 867.123 117.707   6
   4   9   1 909.602 134.891  10
   4   9   2 520.647 112.974  10
   4   9   2 486.692 112.339   8
   4   9   3 6116.27 369.851  10
   4   9   3 5803.45 389.861   8
   4   9   4 33.9351 16.0750  10
   4   9   4 85.4618 40.9869   8
   4   9   5 482.206 113.894   8
   4   9   5 602.909 111.625  10
   4   9   6 1417.78 171.012  10
   4   9   6 1428.88 195.660   8
   4   9   7 605.428 103.728  10
   4   9   7 515.101 111.690   8
   4   9   8 25.0017 26.7411   8
   4   9   9 22.7312 25.5840   8
  -4  -9  -9 0.68742 19.5015  12
   4   9  10 145.068 40.7411   8
   4   9  10 32.2700 11.3313   4
   4  10  -8 43.7489 21.6844   5
   4  10  -7 378.973 74.1892   5
   4  10  -6 165.224 43.3656  10
   4  10  -5 510.019 82.4713  10
   4  10  -4-17.5132 15.3897  10
   4  10  -3 57.3790 27.6939  10
   4  10  -2 81.5038 32.6549  10
   4  10  -1 80.9370 38.6085  10
   4  10   0 784.187 124.940  10
   4  10   1 88.1388 49.3800  10
   4  10   1 54.1923 31.7100   8
   4  10   2 840.769 125.530  10
   4  10   2 777.721 121.615   8
   4  10   3 653.498 115.118  10
   4  10   3 443.353 95.4301   8
   4  10   4 579.879 109.558   8
   4  10   4 671.403 109.014  10
   4  10   5 439.020 98.3530  10
   4  10   5 352.101 85.5680   8
   4  10   6 581.742 97.9762  10
   4  10   6 540.329 102.906   8
   4  10   7 49.9408 27.4287  10
   4  10   7 66.5870 34.7347   8
   4  10   8 698.495 99.6567   8
  -4 -10  -8 584.931 79.4659  12
   4  10   9 374.854 61.7242   8
   4  11  -7 95.1961 25.3574   5
   4  11  -6 140.449 42.0649   5
   4  11  -5 114.867 33.1707  10
   4  11  -4-12.2243 14.7866  10
   4  11  -3-0.95419 13.4928  10
   4  11  -2 789.037 111.076  10
   4  11  -1 1722.00 167.735  10
   4  11   0 38.7991 25.7052  10
   4  11   1 61.7048 31.4634  10
   4  11   2 471.288 88.0458  10
   4  11   2 434.599 76.3971   8
   4  11   3 74.6458 36.8579  10
   4  11   3 105.816 40.8970   8
   4  11   4 724.967 103.093  10
   4  11   4 575.238 91.3270   8
   4  11   5 25.5938 25.5720  10
   4  11   5 22.6322 13.3887   8
   4  11   6 169.685 38.0817  10
   4  11   6 186.973 47.7802   8
   4  11   7-1.30673 12.4939   8
  -4 -11  -7 2.31223 8.15203  12
   4  12  -4 1.97606 9.57108   5
   4  12  -3 159.744 35.8490  10
   4  12  -2 46.1997 24.1114  10
   4  12  -1 51.1274 19.2326  10
   4  12   0 468.815 76.6167  10
   4  12   1 166.428 44.2056  10
   4  12   2 4.27357 8.87734  10
   4  12   3 779.447 86.4736  10
   5 -14   0-5.68633 6.47730   6
   5 -14   1 9.73217 19.6552   6
   5 -14   2 532.911 63.6968   6
   5 -14   3 1041.61 88.9975   6
   5 -13  -4 1023.95 135.813  11
   5 -13  -3 424.029 80.8085  11
   5 -13  -2 2.49232 10.3997   6
   5 -13  -2 3.23479 49.4241  11
   5 -13  -1 123.895 32.2059   6
   5 -13  -1 188.051 29.2505  11
   5 -13   0-87.9694 49.8160  11
   5 -13   0-3.86025 21.1181   6
   5 -13   1-15.7922 33.2669  11
   5 -13   1 49.2077 29.8318   6
   5 -13   2 2839.31 206.248  11
   5 -13   2 2732.57 206.075   6
   5 -13   3 2376.54 178.432  11
   5 -13   3 2254.38 187.040   6
   5 -13   4 414.398 77.2398   6
   5 -13   5 666.217 93.6758   6
   5 -13   6 27.7448 21.1460   6
   5 -13   7 11.5144 17.9959   6
   5 -12  -6 7.71309 23.0395  11
   5 -12  -5 799.379 139.280  11
   5 -12  -4 330.568 90.5594  11
   5 -12  -3 363.386 98.5763  11
   5 -12  -2 338.999 65.9406   6
   5 -12  -2 312.455 82.7817  11
   5 -12  -1 12.1680 8.27983   6
   5 -12  -1-50.4418 48.9470  11
   5 -12   0 184.885 69.0186  11
   5 -12   0 210.934 61.8238   6
   5 -12   1 65.7025 23.6466   6
   5 -12   1 89.8978 44.5174  11
   5 -12   2 475.221 103.162   6
   5 -12   2 446.470 100.857  11
   5 -12   3 323.850 80.6169   6
   5 -12   3 290.210 80.3388  11
   5 -12   4 1339.95 172.932  11
   5 -12   4 1262.70 162.761   6
   5 -12   5 509.221 97.8915   6
   5 -12   5 535.129 99.8996  11
   5 -12   6 47.6571 39.4372   6
   5 -12   6 43.2175 23.6065  11
   5 -12   7 67.1147 35.2715   6
   5 -12   8 29.5605 16.9899   6
   5 -12   9 21.4897 19.6034   6
   5 -11 -10 19.0788 17.4786  12
   5 -11  -9-16.9673 14.4312  12
   5 -11  -8-2.33661 2.35394  12
   5 -11  -7 261.576 98.0811  11
   5 -11  -7 27.0262 12.0805  12
   5 -11  -6 134.284 105.744  11
   5 -11  -6-2.66242 19.6222  12
   5 -11  -5 292.496 123.548  11
   5 -11  -4-24.2177 43.9702  11
   5 -11  -3 337.514 96.9984  11
   5 -11  -2 28.0272 25.7158  11
   5 -11  -2-46.3835 40.4692   6
   5 -11  -1 751.469 123.694   6
   5 -11  -1 739.253 154.283  11
   5 -11   0 133.454 58.7021   6
   5 -11   0 73.6890 47.1568  11
   5 -11   1 494.102 99.4317   6
   5 -11   1 515.509 126.193  11
   5 -11   2 56.5120 26.8419   6
   5 -11   2 55.3254 46.8134  11
   5 -11   3 6.44271 11.5000  11
   5 -11   4 2482.32 283.055  11
   5 -11   5 1332.55 178.135   4
   5 -11   5 1479.05 200.946  11
   5 -11   6 182.014 64.0048   4
   5 -11   6 185.019 68.0115  11
   5 -11   7-27.4681 32.3798   4
   5 -11   7 0.24089 37.1604  11
   5 -11   8 754.506 115.502   4
   5 -11   8 1026.58 137.346  11
   5 -11   9 186.022 55.2814   4
   5 -11   9 179.612 40.8910  11
   5 -11  10 83.6655 29.2775   4
   5 -10 -11 5.45095 13.4713  12
   5 -10 -10-6.04338 19.3861  12
   5 -10  -9 105.293 51.1503  12
   5 -10  -8 560.930 109.854  12
   5 -10  -8 365.393 89.6717  11
   5 -10  -7 39.6663 18.5412  12
   5 -10  -7 158.505 89.6338  11
   5 -10  -6 111.642 51.9201  12
   5 -10  -6 67.7483 95.5394  11
   5 -10  -5 1048.00 144.256  12
   5 -10  -5 1159.74 214.473  11
   5 -10  -4 15.4257 46.8885   7
   5 -10  -4 13.1118 33.4011  11
   5 -10  -3 46.2356 28.7422   7
   5 -10  -3-6.15550 8.44214  11
   5 -10  -2 144.631 76.1291   7
   5 -10  -2 85.6419 64.3080  11
   5 -10  -2 92.0721 48.7966   6
   5 -10  -1 329.864 93.4946   7
   5 -10  -1 296.256 76.6936   6
   5 -10  -1 333.694 102.768  11
   5 -10   0 428.258 99.2217   6
   5 -10   0 515.271 128.708  11
   5 -10   1 687.748 130.402   6
   5 -10   1 704.790 153.392  11
   5 -10   2 420.510 123.495  11
   5 -10   3 563.593 149.173  11
   5 -10   3 499.006 115.188   4
   5 -10   4 2114.58 242.576   4
   5 -10   4 2190.13 281.562  11
   5 -10   5 3491.37 347.404  11
   5 -10   5 2999.53 289.177   4
   5 -10   6 1430.00 192.620   4
   5 -10   6 1554.67 222.209  11
   5 -10   7 14.3688 24.3978   4
   5 -10   7 29.8881 17.3346  11
   5 -10   8 109.597 45.0270  11
   5 -10   8 106.793 50.9908   4
   5 -10   9 188.909 73.4668  11
   5 -10   9 82.1285 39.3903   4
   5 -10  10-43.0831 31.0873  11
   5 -10  10-1.27208 20.2429   4
   5 -10  11 47.4376 23.8648   4
   5  -9 -12 47.2976 26.1043  12
   5  -9 -11 10.2082 9.73524  12
   5  -9 -10 10.4654 21.4309  12
   5  -9  -9 40.4245 32.4541  12
   5  -9  -8 614.122 127.732  12
   5  -9  -8 523.941 145.053  11
   5  -9  -7 38.2759 30.7620  12
   5  -9  -7-85.8485 83.6935  11
   5  -9  -6-52.4881 73.4553   7
   5  -9  -6 20.8853 21.4263  12
   5  -9  -6 45.5276 47.5782  11
   5  -9  -5 311.451 116.857   7
   5  -9  -5 246.966 75.4679  12
   5  -9  -5 333.007 92.6197  11
   5  -9  -4 1340.93 225.003   7
   5  -9  -4 1254.31 209.317  11
   5  -9  -3 70.2389 39.8810   7
   5  -9  -3 71.1895 42.9668  11
   5  -9  -2 51.2531 48.1771   7
   5  -9  -2 10.8300 12.7949  11
   5  -9  -1 1245.41 194.897   7
   5  -9  -1 965.530 186.417  11
   5  -9  -1 1238.70 152.628   6
   5  -9   0 292.535 66.1764   6
   5  -9   0 147.386 58.9462  11
   5  -9   0 243.550 78.6943   7
   5  -9   1 40.9826 47.5615  11
   5  -9   2 696.140 150.044  11
   5  -9   2 1189.99 164.487   4
   5  -9   3 295.502 106.790  11
   5  -9   3 307.401 82.7005   4
   5  -9   4 36.3664 60.1785  11
   5  -9   4 5.27108 23.9828   4
   5  -9   5 98.7217 44.1109  11
   5  -9   5 65.5687 34.6771   4
   5  -9   6 6169.44 484.859  11
   5  -9   6 5317.98 388.190   4
   5  -9   7 319.979 100.648  11
   5  -9   7 235.593 81.3002   4
   5  -9   8 1415.19 195.734   4
   5  -9   8 1276.25 212.576  11
   5  -9   9 865.372 147.907   4
   5  -9   9 725.395 144.398  11
   5  -9  10 89.2281 48.9750  11
   5  -9  10 115.824 48.9021   4
   5  -9  11 111.000 52.4109  11
   5  -9  11 52.5694 33.0164   4
   5  -9  12 17.6127 25.7441  11
   5  -9  12-13.7402 22.4838   4
   5  -8 -13-27.5845 25.9839  12
   5  -8 -12 3.09496 21.4419  12
   5  -8 -11 105.973 48.0840  12
   5  -8 -10-4.74290 6.64033  12
   5  -8  -9 0.27639 19.4501  12
   5  -8  -8 16.0825 20.4252  12
   5  -8  -8 204.895 102.788  11
   5  -8  -7 5610.63 384.236  12
   5  -8  -7 5695.12 479.667   7
   5  -8  -7 5736.19 475.647  11
   5  -8  -6 7921.22 549.011   7
   5  -8  -6 7188.74 419.545  12
   5  -8  -6 7349.25 486.949  11
   5  -8  -5 514.905 141.727   7
   5  -8  -5 448.263 94.7891  12
   5  -8  -5 415.452 104.367  11
   5  -8  -4 67.2310 41.9213   7
   5  -8  -4 140.731 68.1460  11
   5  -8  -3 66.5556 51.7961   7
   5  -8  -3 14.9462 33.8869  11
   5  -8  -2 46.9990 50.4224   7
   5  -8  -2 68.2038 49.7885  11
   5  -8  -1 566.932 128.161   7
   5  -8  -1 553.180 130.102  11
   5  -8   0 4170.29 330.995   7
   5  -8   0 2599.96 288.849  11
   5  -8   1 37.9500 18.3845  11
   5  -8   1 23.7251 45.7544   7
   5  -8   2 1996.67 261.127  11
   5  -8   3 57.6772 50.2327  11
   5  -8   4 2238.67 283.409  11
   5  -8   4 3378.31 284.604   4
   5  -8   5 726.458 160.751  11
   5  -8   5 1095.56 164.602   4
   5  -8   6 4067.67 337.880   4
   5  -8   6 4475.81 413.441  11
   5  -8   7 563.883 149.267  11
   5  -8   7 555.083 125.803   4
   5  -8   8 1953.47 239.150   4
   5  -8   8 1852.38 270.817  11
   5  -8   9 72.2731 35.4302  11
   5  -8   9 25.3040 21.5921   4
   5  -8  10 90.1446 56.5430  11
   5  -8  10 124.850 60.4668   4
   5  -8  11 554.013 112.782   4
   5  -8  11 610.584 139.254  11
   5  -8  12 257.251 65.2926   4
   5  -8  12 124.142 61.7075  11
   5  -8  13 54.9350 26.0946  11
   5  -8  13 34.1877 21.0815   4
   5  -7 -14 164.111 45.7148  12
   5  -7 -13 953.266 134.068  12
   5  -7 -12 224.709 70.7684  12
   5  -7 -11 83.1974 52.6224  12
   5  -7 -10-38.3601 39.8402  12
   5  -7  -9 54.2281 29.3443  12
   5  -7  -8 992.056 193.646   7
   5  -7  -8 973.630 167.913  12
   5  -7  -8 1144.19 209.506  11
   5  -7  -7 16291.9 783.283   7
   5  -7  -7 15717.1 652.615  12
   5  -7  -7 16944.6 717.178  11
   5  -7  -6 24403.5 921.780   7
   5  -7  -6 23459.5 739.358  12
   5  -7  -6 25961.4 899.115  11
   5  -7  -5 658.249 147.114   7
   5  -7  -5 1064.83 145.999  12
   5  -7  -5 1060.65 167.985  11
   5  -7  -4 616.187 134.793   7
   5  -7  -4 602.924 135.244  11
   5  -7  -3-8.22620 24.3028   7
   5  -7  -3 21.5590 18.4954  11
   5  -7  -2 84.6664 32.5874   7
   5  -7  -2 36.4905 36.1889  11
   5  -7  -1 553.842 258.236   3
   5  -7   0 2435.73 500.575   3
   5  -7   1 124.095 104.344   3
   5  -7   2 394.968 113.417  11
   5  -7   2 765.208 280.277   3
   5  -7   3 95.7838 50.2771  11
   5  -7   3 380.286 216.495   3
   5  -7   4 763.230 284.128   3
   5  -7   4 441.640 119.460  11
   5  -7   5 141.737 67.5128  11
   5  -7   5 85.9868 49.3422   8
   5  -7   5 139.887 62.4686   4
   5  -7   6-45.0271 34.2854   8
   5  -7   6-52.7819 58.9408   4
   5  -7   7 2887.47 291.110   8
   5  -7   7 2648.64 273.229   4
   5  -7   8 1463.75 210.370   8
   5  -7   8 1417.71 204.439   4
   5  -7   9-24.9855 28.1743   4
   5  -7  10 5926.85 419.236   4
   5  -7  11 2688.51 269.454   4
   5  -7  12 12.4150 7.08496   4
   5  -7  13 5.13502 27.0197  11
   5  -7  13 12.6172 16.2385   4
   5  -7  14 191.865 52.1587  11
   5  -7  14 287.680 55.4055   4
   5  -6 -14 409.344 82.7203  12
   5  -6 -13 538.777 109.813  12
   5  -6 -12 15.4724 31.1411  12
   5  -6 -11-33.7609 36.8403  12
   5  -6 -10 154.968 76.0611  12
   5  -6  -9-17.7577 19.1095   7
   5  -6  -9 13.1112 42.4183  12
   5  -6  -8 369.987 108.054   7
   5  -6  -8 491.055 108.155  12
   5  -6  -8 477.610 133.159  11
  -5   6   7 2307.20 438.414   1
   5  -6  -7 2946.60 307.554   7
   5  -6  -7 2958.12 270.449  12
   5  -6  -7 2576.71 257.803  11
   5  -6  -6 1044.56 154.073   5
   5  -6  -6 1108.02 187.509   7
   5  -6  -6 1142.81 156.380  12
  -5   6   6 820.769 258.201   1
   5  -6  -6 1227.39 169.406  11
   5  -6  -5 142.678 57.5550   5
   5  -6  -5 202.561 78.4518   7
   5  -6  -5 305.781 76.9492  12
   5  -6  -5 229.249 73.5984  11
   5  -6  -3 710.460 245.282   3
   5  -6  -2 2525.42 499.110   3
   5  -6  -1 2247.67 467.994   3
   5  -6   0 40.2002 64.9214   3
   5  -6   1 2919.77 532.671   3
   5  -6   2 244.457 120.109   3
   5  -6   3 24655.6 1528.41   3
   5  -6   4 6671.81 785.541   3
   5  -6   5 185.627 116.307   3
   5  -6   5-3.41132 25.2068   8
   5  -6   6-6.05370 32.2788   4
   5  -6   6 6.36703 10.3277   8
   5  -6   7 2665.67 268.734   8
   5  -6   7 3935.00 317.617   4
   5  -6   8 11.7296 8.67442   8
   5  -6   8-45.0748 43.0380   4
   5  -6   9 447.519 108.493   4
   5  -6   9 474.056 121.436   8
   5  -6  10 2939.82 285.010   8
   5  -6  10 2727.84 286.497   4
   5  -6  11 1156.70 168.197   8
   5  -6  11 1284.97 190.480   4
   5  -6  12 565.894 121.623   4
   5  -6  13 9.23703 21.0417   4
   5  -6  14-6.81564 22.9200   4
   5  -6  14-2.21720 18.6387  11
   5  -5 -15 16.7344 9.14514  12
   5  -5 -14-24.1644 34.2281  12
   5  -5 -13 6.09231 17.7067  12
   5  -5 -12 94.1461 52.3142  12
   5  -5 -11 995.565 179.757  12
   5  -5 -10 18.2882 25.7171  12
   5  -5  -9 565.221 129.218   7
   5  -5  -9 621.520 134.399  12
   5  -5  -8 907.360 156.250  12
   5  -5  -8 541.111 99.0547   5
   5  -5  -8 787.119 140.426  11
   5  -5  -8 789.362 158.074   7
  -5   5   8 375.122 176.255   1
   5  -5  -7 995.143 139.501   5
   5  -5  -7 963.449 171.969   7
  -5   5   7 789.695 260.289   1
   5  -5  -7 1180.15 167.678  12
   5  -5  -7 1017.90 144.132  11
   5  -5  -6 1471.63 174.315   5
   5  -5  -6 729.664 136.669   7
  -5   5   6 938.910 257.999   1
   5  -5  -6 1370.91 167.921  12
   5  -5  -6 1302.06 175.478  11
  -5   5   5 409.405 156.083   1
   5  -5  -5 377.611 188.890   3
   5  -5  -4 3631.61 552.418   3
   5  -5  -3 6700.26 771.800   3
   5  -5  -2 109.401 146.955   3
   5  -5  -1 6321.08 741.528   3
   5  -5   0 198.091 140.168   3
   5  -5   1 1802.18 381.977   3
   5  -5   2 12281.5 1009.47   3
   5  -5   3 15348.6 1127.20   3
   5  -5   4 5202.09 646.857   3
   5  -5   5 2228.71 420.098   3
   5  -5   6 51.6018 38.7529   8
   5  -5   7 348.438 86.9170   8
   5  -5   7 554.060 105.271   4
   5  -5   8 261.479 76.9602   4
   5  -5   8 229.850 82.9412   8
   5  -5   9-2.50158 17.1880   8
   5  -5   9-32.7683 38.3795   4
   5  -5  10 1061.57 174.671   8
   5  -5  10 680.799 130.996   4
   5  -5  11 762.108 138.321   8
   5  -5  11 707.206 135.431   4
   5  -5  12 19.2016 36.0024   8
   5  -5  12-4.43075 27.0305   4
   5  -5  13 18.7152 24.7807   4
   5  -5  14 260.497 64.8556   4
   5  -4 -15 19.3773 11.7907  12
   5  -4 -14-1.38377 18.8579  12
   5  -4 -13 29.1034 27.3145  12
   5  -4 -12 678.967 147.717  12
   5  -4 -11 56.3136 51.0477  12
   5  -4 -10 881.965 164.107  12
   5  -4  -9 535.921 127.622  12
   5  -4  -8 2375.32 211.208   5
   5  -4  -8 2430.07 256.888   7
   5  -4  -8 2870.28 275.831  12
   5  -4  -8 2622.25 246.022  11
   5  -4  -7 2081.01 197.260   5
   5  -4  -7 1972.32 224.082   7
   5  -4  -7 1504.72 186.659  12
   5  -4  -7 2154.34 205.064  11
   5  -4  -6 820.844 238.675   3
   5  -4  -5 1820.30 373.389   3
   5  -4  -4 5474.66 656.488   3
   5  -4  -3-14.8553 54.7367   3
   5  -4  -2 1056.25 279.701   3
   5  -4  -1 14357.1 1029.55   3
   5  -4   0 743.098 242.662   3
   5  -4   1 3718.70 507.110   3
   5  -4   2 29.4720 33.7495   3
   5  -4   3 1151.30 286.043   3
   5  -4   4 98.4853 71.9358   3
   5  -4   5 15.3341 45.0050   3
   5  -4   6 2630.98 440.724   3
   5  -4   7 2473.78 252.949   8
   5  -4   8 57.2998 33.6852   8
   5  -4   8 66.4999 35.3219   4
   5  -4   9 186.715 60.6533   8
   5  -4   9 317.233 82.4671   4
   5  -4  10 876.551 153.465   8
   5  -4  10 845.347 147.459   4
   5  -4  11 1423.62 198.783   8
   5  -4  11 1291.96 182.528   4
   5  -4  12 450.837 99.2675   8
   5  -4  12 461.319 102.042   4
   5  -4  13 232.098 57.6302   8
   5  -4  13 162.826 51.2178   4
   5  -4  14 225.627 61.2462   4
   5  -4  15 139.554 35.7586   4
   5  -3 -15 360.442 71.9553  12
   5  -3 -14 433.353 98.6697  12
   5  -3 -13 52.5463 41.9471  12
   5  -3 -12 138.991 61.3627  12
   5  -3 -11 188.778 78.9235  12
   5  -3 -10 160.215 77.8880  12
   5  -3  -9 842.947 156.316  12
   5  -3  -8-33.5004 49.3807   5
   5  -3  -8 15.7841 23.6652  12
   5  -3  -7 101.266 52.1428  12
   5  -3  -5 738.887 229.480   3
   5  -3  -4 5653.21 608.817   3
   5  -3  -3 273.771 131.471   3
   5  -3  -2 10002.1 789.064   3
   5  -3  -1 1373.06 293.678   3
   5  -3   0 547.378 186.172   3
   5  -3   1 2001.88 343.773   3
   5  -3   2 1510.94 297.611   3
   5  -3   3 2631.68 400.392   3
   5  -3   4 414.223 158.320   3
   5  -3   5 6305.64 627.708   3
   5  -3   6 5079.09 569.656   3
   5  -3   7 144.389 69.3956   8
   5  -3   8 8.23979 23.5825   8
   5  -3   8 29.6591 20.7069   4
   5  -3   9 75.8391 53.6562   8
   5  -3   9 96.0841 43.4669   4
   5  -3  10 13.9865 26.2370   8
   5  -3  10 17.3987 20.8518   4
   5  -3  11 171.236 65.3484   8
   5  -3  11 147.655 59.7279   4
   5  -3  12 1793.82 211.740   8
   5  -3  12 1637.46 199.912   4
   5  -3  13 66.5202 26.5875   8
   5  -3  13 76.0642 42.4566   4
   5  -3  14 125.981 47.0092   4
   5  -3  15 17.0866 18.3705   4
   5  -2 -15 1341.78 144.753  12
   5  -2 -14 356.959 90.7230  12
   5  -2 -13 53.0760 44.2464  12
   5  -2 -12 379.940 105.906  12
   5  -2 -11 847.862 160.719  12
   5  -2 -10 2047.71 254.517  12
   5  -2  -9 1094.30 176.594  12
   5  -2  -8 515.652 117.464  12
   5  -2  -5 88.3304 71.8157   3
   5  -2  -4 7952.51 678.961   3
   5  -2  -3 5474.04 549.145   3
   5  -2  -2 619.014 181.539   3
   5  -2  -1-38.4341 47.6975   3
   5  -2   0 19563.5 1073.42   3
   5  -2   1 1366.55 286.768   3
   5  -2   2 13910.2 930.036   3
   5  -2   3 10972.1 826.960   3
   5  -2   4 4136.99 507.518   3
   5  -2   5 2616.38 413.496   3
   5  -2   6 1342.70 290.941   3
   5  -2   7 6699.85 405.972   8
   5  -2   8 12327.9 588.343   8
   5  -2   8 17413.9 572.208   4
   5  -2   9 1413.10 198.462   8
   5  -2   9 1755.40 192.605   4
   5  -2  10 2890.88 294.605   8
   5  -2  10 2511.16 245.335   4
   5  -2  11 1515.83 208.121   8
   5  -2  11 1320.03 187.849   4
   5  -2  12 27.9029 42.0090   8
   5  -2  12 0.88634 39.8938   4
   5  -2  13 169.413 47.2617   8
   5  -2  13 150.424 58.1078   4
   5  -2  14 126.624 46.6117   4
   5  -2  14 78.4293 36.6820   8
   5  -2  15 244.578 56.5840   4
   5  -1 -15 1929.77 172.509  12
   5  -1 -14 2.36406 21.4836   9
   5  -1 -14 30.3364 35.2871  12
   5  -1 -13 546.457 126.411  12
   5  -1 -13 414.217 93.2353   9
   5  -1 -12 299.309 84.1021   9
   5  -1 -12 469.358 122.708  12
   5  -1 -11 247.247 74.9333   9
   5  -1 -11 291.412 95.8084  12
   5  -1 -10 77.9569 43.7080   9
   5  -1 -10 94.5739 39.9270  12
   5  -1  -9-5.26005 34.2399   9
   5  -1  -9 14.5143 9.31914  12
   5  -1  -8 114.921 72.0789   2
   5  -1  -8 77.7777 50.0561  12
   5  -1  -7 199.157 82.6012   2
   5  -1  -6 801.272 226.899   2
   5  -1  -5 721.647 189.398   2
   5  -1  -5 786.600 200.185   3
   5  -1  -4 142.742 79.5800   3
   5  -1  -3 70.9921 77.9702   3
   5  -1  -2 70.7643 71.1637   3
   5  -1  -1 1531.01 291.603   3
   5  -1   0 8003.17 640.594   3
   5  -1   1 49036.1 1587.97   3
   5  -1   2 356.590 131.139   3
   5  -1   3 10780.4 761.463   3
   5  -1   4 6566.93 609.626   3
   5  -1   5 168.464 86.5234   3
   5  -1   6 1054.15 263.143   3
   5  -1   7 6719.21 666.345   3
   5  -1   8 17092.0 680.594   8
   5  -1   9 77.2790 43.4664   8
   5  -1   9 90.9661 34.8955   4
   5  -1  10 1112.28 187.550   8
   5  -1  10 735.901 127.604   4
   5  -1  11 1150.48 191.827   8
   5  -1  11 893.266 146.520   4
   5  -1  12 1044.65 167.885   8
   5  -1  12 926.146 148.865   4
   5  -1  13 532.082 109.879   8
   5  -1  13 445.009 99.2852   4
   5  -1  14 303.772 75.3487   4
   5  -1  14 378.951 75.2036   8
   5  -1  15-33.6719 21.6533   4
   5   0 -15 144.668 42.4183  12
   5   0 -15 170.786 48.0320   9
   5   0 -14-11.1059 23.5757   9
   5   0 -14 55.2432 41.1594  12
   5   0 -13 492.030 108.675  12
   5   0 -13 447.315 100.573   9
   5   0 -12 2474.95 254.147   9
   5   0 -12 3029.54 303.842  12
   5   0 -11 60.4519 42.8876   9
   5   0 -11 98.7212 60.1289  12
   5   0 -10 210.288 67.4407   9
   5   0 -10 284.337 89.9905  12
   5   0  -9 318.379 84.7390   9
   5   0  -9 139.515 112.543   2
   5   0  -9 232.441 84.1895  12
   5   0  -8 2803.18 216.147   5
   5   0  -8 2679.54 477.211   2
   5   0  -8 2314.85 221.259   9
   5   0  -8 1720.89 212.836  12
   5   0  -7 2369.82 430.779   2
   5   0  -7 1410.53 184.024  12
   5   0  -6 3761.55 496.716   2
   5   0  -5 16348.3 952.245   2
   5   0  -4 4212.40 454.533   3
   5   0  -4 4146.04 422.141   2
   5   0  -3 1405.80 265.375   3
   5   0  -3 1127.73 194.314   2
   5   0  -2 3547.73 408.669   3
   5   0  -2 2708.77 270.636   2
   5   0  -1 7691.66 599.383   3
   5   0   0 17510.6 938.350   3
   5   0   1 58027.5 1760.53   3
   5   0   2 1707.14 296.865   3
   5   0   3 289.426 130.984   3
   5   0   4 122.029 76.9881   3
   5   0   5 95.4237 69.1250   3
   5   0   6 1981.53 341.099   3
   5   0   7 879.530 135.224  10
   5   0   7 830.852 134.805   8
   5   0   7 802.165 198.513   3
   5   0   8 1736.85 196.497  10
   5   0   8 1877.97 223.885   8
   5   0   9 11151.9 570.318   8
   5   0   9 14965.1 576.159   4
   5   0  10 4458.55 367.533   8
   5   0  10 3668.45 298.545   4
   5   0  11 3980.20 352.427   8
   5   0  11 3087.38 274.848   4
   5   0  12 147.593 57.2151   8
   5   0  12 85.2643 47.9597   4
   5   0  13 106.239 44.9401   8
   5   0  13 79.8631 37.7936   4
   5   0  14 5.36177 12.7985   4
   5   0  14-10.4396 19.3431   8
   5   0  15 82.8514 31.6782   4
   5   1 -15-4.31231 10.9483   9
   5   1 -14 37.1112 22.2379   9
   5   1 -14 62.4739 19.5325  12
   5   1 -13 37.9378 22.3043  12
   5   1 -13 42.6342 36.4379   9
   5   1 -12 2300.65 255.255   9
   5   1 -12 2799.49 289.317  12
   5   1 -11 445.057 118.449   9
   5   1 -11 451.793 119.742  12
   5   1 -10 103.944 49.7019   9
   5   1 -10 146.764 67.4340  12
   5   1  -9 954.743 276.654   2
   5   1  -9 921.106 156.603   9
   5   1  -9 703.291 143.482  12
   5   1  -8-2.05536 13.7630   2
   5   1  -8-22.8740 27.8228  12
   5   1  -8 51.2799 37.0810   5
   5   1  -8 29.5914 14.2906   9
   5   1  -7 394.336 176.092   2
   5   1  -7 298.741 83.6027   9
   5   1  -7 257.081 77.7644  12
   5   1  -6 10203.5 858.352   2
   5   1  -5 4331.76 518.522   2
   5   1  -4 192.800 103.557   3
   5   1  -4 176.266 89.2733   2
   5   1  -3 674.961 174.675   3
   5   1  -3 685.964 171.801   2
   5   1  -2 119.815 67.5217   3
   5   1  -1 7000.36 604.120   3
   5   1   0 18918.9 1030.59   3
   5   1   0 16865.4 724.419   1
   5   1   1 569.869 180.394   3
   5   1   2 7417.37 673.385   3
   5   1   3 23953.6 1240.78   3
   5   1   4 4631.94 548.845   3
   5   1   5 174.988 119.476   3
   5   1   6 887.636 239.101   3
   5   1   7 48.9368 40.6443  10
   5   1   7 5.73569 56.6014   3
   5   1   7 52.2984 32.5680   8
   5   1   8-29.6074 17.5429  10
   5   1   8 68.9924 55.4440   8
   5   1   9 3969.11 308.837  10
   5   1   9 3874.67 353.462   8
   5   1   9 3654.80 293.996   4
   5   1  10 1300.38 201.682   8
   5   1  10 1164.55 165.789   4
   5   1  11 282.881 92.3920   8
   5   1  11 188.871 70.6339   4
   5   1  12 59.4865 30.2904   8
   5   1  12 12.7365 24.9751   4
   5   1  13 41.3540 34.3552   8
   5   1  13-6.66274 14.9005   4
   5   1  14 148.171 42.5525   8
   5   1  14 159.299 52.7954   4
   5   1  15 35.4674 21.9991   4
   5   2 -15 3.46469 17.5390   9
   5   2 -14 304.732 79.3329   9
   5   2 -14 377.131 86.2406  12
   5   2 -13 962.071 157.547   9
   5   2 -13 1129.31 169.865  12
   5   2 -12 39.1539 23.6392   9
   5   2 -12 23.6540 11.1940  12
   5   2 -11 1987.58 247.756   9
   5   2 -11 2410.02 283.319  12
   5   2 -10 554.487 126.213   9
   5   2 -10 767.702 155.268  12
   5   2  -9 223.350 60.1268   2
   5   2  -9 280.873 89.5373   9
   5   2  -9 310.910 97.4943  12
   5   2  -8 228.757 135.466   2
   5   2  -8 362.949 100.259   9
   5   2  -8 428.346 85.7766   5
   5   2  -8 288.448 91.1654  12
   5   2  -7 422.192 191.662   2
   5   2  -7 653.007 110.584   5
   5   2  -7 496.380 111.501   9
   5   2  -7 331.492 86.4145  12
   5   2  -6 769.397 248.272   2
   5   2  -6 436.634 102.963  12
   5   2  -5-16.8683 11.0663   2
   5   2  -4 3287.12 381.652   3
   5   2  -4 2834.41 417.141   2
   5   2  -3 1399.02 261.934   3
   5   2  -2 4098.53 470.147   3
   5   2  -1 704.301 170.749   1
   5   2  -1 777.838 204.884   3
   5   2   0 21635.0 945.681   1
   5   2   1 218.251 95.0898   1
   5   2   6 2249.44 219.789  10
   5   2   6 2282.60 222.799   8
   5   2   7 1279.74 172.623  10
   5   2   7 1640.36 356.842   3
   5   2   7 1217.64 167.879   8
   5   2   8 13043.3 567.096  10
   5   2   8 18553.1 696.796   8
   5   2   9 14136.4 575.714  10
   5   2   9 13772.6 628.949   8
   5   2   9 12376.5 550.550   4
   5   2  10 393.176 99.4150  10
   5   2  10 594.650 132.225   8
   5   2  10 380.302 95.6002   4
   5   2  11 2814.52 291.487   8
   5   2  11 2231.76 230.546   4
   5   2  12 104.177 56.6204   8
   5   2  12 131.035 55.2139   4
   5   2  13 412.717 94.3838   8
   5   2  13 230.719 63.2704   4
   5   2  14 526.186 84.4294   8
   5   2  14 339.720 66.0018   4
   5   3 -15 18.0666 6.44875   9
   5   3 -14 214.795 61.9991   9
   5   3 -13 28.0550 29.1265   9
   5   3 -13 9.40133 28.9669  12
   5   3 -12 1097.91 179.853   9
   5   3 -12 1102.50 179.802  12
   5   3 -11 182.621 82.3730  12
   5   3 -11 91.0782 33.6172   9
   5   3 -10 206.959 89.7258   9
   5   3 -10 174.952 78.9647  12
   5   3  -9 3.54814 40.8066  12
   5   3  -9 59.7630 48.5533   9
   5   3  -9 79.1780 35.6777   5
   5   3  -8 52.3595 48.8142  12
   5   3  -8 189.083 75.7577   9
   5   3  -8 116.428 50.5716   5
   5   3  -8 94.6639 88.5486   2
   5   3  -7 1303.87 341.682   2
   5   3  -7 1220.59 154.301   5
   5   3  -7 1257.14 191.523   9
   5   3  -7 821.660 162.671  12
   5   3  -6 1152.03 286.276   2
   5   3  -6 1411.49 164.048   5
   5   3  -6 906.760 155.268   9
   5   3  -6 922.537 164.140  12
   5   3  -5 3785.46 314.458   9
   5   3  -5 3963.65 335.477  12
   5   3  -4 12049.7 992.316   2
   5   3  -3 1162.47 252.164   3
   5   3  -2 7820.32 694.823   1
   5   3  -1 19312.9 1036.94   1
   5   3   0 21033.1 1023.71   1
   5   3   1 6318.86 565.505   1
   5   3   2 356.414 132.191   1
   5   3   5 370.289 85.9116  10
   5   3   5 284.925 81.0730   8
   5   3   6 1132.66 160.227  10
   5   3   6 1024.36 153.751   8
   5   3   7 634.789 128.386  10
   5   3   7 872.696 146.201   8
   5   3   8 67.9899 45.9209  10
   5   3   8 114.399 55.6776   8
   5   3   9 207.431 68.4263  10
   5   3   9 201.414 73.3839   8
   5   3  10 649.191 118.428  10
   5   3  10 771.586 149.692   8
   5   3  10 633.137 128.368   4
   5   3  11 494.726 114.523   8
   5   3  11 358.690 91.0966   4
   5   3  12 996.081 154.760   8
   5   3  12 669.851 112.575   4
   5   3  13 527.186 101.099   8
   5   3  13 466.406 85.9380   4
   5   3  14 68.3488 26.1502   8
   5   3  14 43.7734 22.8873   4
   5   4 -14 3.59164 17.3552   9
   5   4 -13 505.866 106.884   9
   5   4 -12 140.535 58.9168   9
   5   4 -11-10.8192 20.6102   9
   5   4 -11 2.14422 31.6416  12
   5   4 -10 84.1125 57.2836   9
   5   4 -10 75.4093 44.2450  12
   5   4  -9 314.191 111.689  12
   5   4  -9 265.385 88.1714   9
   5   4  -9 268.489 73.1597   5
   5   4  -8 3197.84 259.226   5
   5   4  -8 3361.96 337.437   9
   5   4  -8 3189.48 347.785  12
   5   4  -7 1122.79 338.167   2
   5   4  -7 1177.35 154.897   5
   5   4  -7 1268.33 206.182   9
   5   4  -7 739.985 153.507  12
   5   4  -6 401.948 156.194   2
   5   4  -6 592.055 103.713   5
   5   4  -6 668.935 146.222   9
   5   4  -6 320.091 99.6671  12
   5   4  -5 333.567 107.352  12
   5   4  -5 305.960 88.6826   9
   5   4  -5 327.028 177.784   2
   5   4  -4 1365.44 199.679   9
   5   4  -4 1859.97 399.856   2
   5   4  -4 1265.09 199.361  12
   5   4  -3 1280.25 190.490   9
   5   4  -3 1939.21 339.714   3
   5   4  -3 1735.31 365.768   1
   5   4  -2 1711.06 342.125   1
   5   4  -1 4899.94 574.123   1
   5   4   0 1414.53 298.058   1
   5   4   1-18.7091 55.1128   1
   5   4   2 35.8435 55.0472   1
   5   4   3 305.739 65.0212  10
   5   4   4 768.494 120.656  10
   5   4   4 1153.49 152.780   8
   5   4   5 6338.06 380.854  10
   5   4   5 8792.09 455.951   8
   5   4   6 842.646 150.391  10
   5   4   6 917.960 156.401   8
   5   4   7-11.0157 22.9361  10
   5   4   7 22.5510 28.4984   8
   5   4   8 2279.75 234.546  10
   5   4   8 1678.53 215.564   8
   5   4   9 1782.28 209.581  10
   5   4   9 1625.71 211.870   8
   5   4  10 49.5952 48.8407  10
   5   4  10-2.31337 4.25778   8
   5   4  10 15.9959 21.4471   4
   5   4  11 1789.46 214.952   8
   5   4  11 1249.66 162.140   4
   5   4  12 54.1536 25.6623   8
   5   4  12 30.5905 21.7091   4
   5   4  13 6.42026 22.3889   8
   5   4  13 15.4506 18.4779   4
   5   4  14 32.7872 10.2193   8
   5   5 -14 39.1312 14.2847   9
   5   5 -13 375.672 85.5019   9
   5   5 -12 153.253 63.2585   9
   5   5 -11 581.312 131.135   9
   5   5 -10 13.4353 22.3073   9
   5   5  -9 403.075 115.611   9
   5   5  -9 427.178 88.1080   5
   5   5  -8 1282.58 163.156   5
   5   5  -8 1461.45 228.257   9
   5   5  -7 19.9407 15.3830   9
   5   5  -7 29.9353 32.2929   5
   5   5  -6 90.5699 60.7153   9
   5   5  -6 29.6900 53.9652   2
   5   5  -5 69.0174 61.0871   9
   5   5  -5-66.0494 150.587   2
   5   5  -4 1285.34 203.067   9
   5   5  -3 5210.50 420.899   9
   5   5  -3 6310.49 747.982   1
   5   5  -2 4101.47 361.659   9
   5   5  -2 5149.25 653.590   1
   5   5  -1 15547.7 492.941  10
   5   5  -1 13898.3 1046.93   1
   5   5  -1 12789.7 636.619   9
   5   5   0 600.879 102.327  10
   5   5   0 1031.86 272.022   1
   5   5   1 2664.57 211.944  10
   5   5   1 4690.12 568.939   1
   5   5   2 446.707 92.7694  10
   5   5   2 764.492 127.214   8
   5   5   2 811.384 245.557   1
   5   5   3 1260.67 158.500  10
   5   5   3 1663.26 191.473   8
   5   5   4 92.7340 47.8797  10
   5   5   4 85.9904 44.8399   8
   5   5   5 196.742 67.3837  10
   5   5   5 252.452 81.8939   8
   5   5   6 220.893 72.0944  10
   5   5   6 290.743 88.4655   8
   5   5   7 1628.42 209.035  10
   5   5   7 1234.99 188.524   8
   5   5   8 30.5862 14.1207  10
   5   5   8 46.3761 21.9781   8
   5   5   9 2753.58 251.683  10
   5   5   9 2297.47 250.461   8
   5   5  10 806.256 116.106  10
   5   5  10 773.421 136.183   8
   5   5  10 605.055 122.280   4
   5   5  11 68.2623 49.7895   8
   5   5  11 46.4438 23.3215   4
   5   5  12 444.582 88.1229   8
   5   5  12 288.968 62.9532   4
   5   5  13 15.2322 10.9427   8
   5   5  13-4.30488 9.30833   4
   5   6 -13 3.02585 16.8134   9
   5   6 -12 127.122 42.4688   9
   5   6 -11 154.175 67.5300   9
   5   6 -10-37.6139 32.3904   9
   5   6  -9 653.993 107.562   5
   5   6  -9 725.264 165.014   9
   5   6  -8 2335.75 221.086   5
   5   6  -8 2341.17 289.775   9
   5   6  -7 4473.88 314.819   5
   5   6  -7 5413.51 452.724   9
   5   6  -6 242.926 88.1856   9
   5   6  -5 41.7143 28.8633   9
   5   6  -4 19.4542 22.6745  10
   5   6  -4 39.7223 37.5736   9
   5   6  -3 571.039 112.327  10
   5   6  -3 356.516 111.662   9
   5   6  -3 624.100 274.615   1
   5   6  -2 641.087 114.511  10
   5   6  -2 480.182 132.370   9
   5   6  -2 687.492 266.468   1
   5   6  -1 6140.05 327.306  10
   5   6  -1 5053.92 667.510   1
   5   6   0 13571.4 500.891  10
   5   6   0 12016.0 1004.68   1
   5   6   1 2096.05 202.717  10
   5   6   1 2207.58 426.465   1
   5   6   2 5126.54 323.362  10
   5   6   2 5609.04 659.393   1
   5   6   2 4893.02 332.203   8
   5   6   3 2602.57 240.534  10
   5   6   3 2464.93 243.205   8
   5   6   4 1724.61 198.898  10
   5   6   4 1658.87 209.179   8
   5   6   5 386.899 93.2824  10
   5   6   5 200.378 69.0401   8
   5   6   6 3549.23 304.602  10
   5   6   6 2901.22 285.041   8
   5   6   7-62.6130 54.3699  10
   5   6   7-38.7544 28.1460   8
   5   6   8 3318.76 279.558  10
   5   6   8 2745.79 275.219   8
   5   6   9 4716.57 312.435  10
   5   6   9 4252.69 327.615   8
   5   6  10 51.5591 39.5069   8
   5   6  10 11.1321 3.17364   4
   5   6  11 473.842 100.512   8
   5   6  11 407.176 73.5517   4
   5   6  12-14.0926 20.1665   8
   5   6  12-26.6761 17.0453   4
   5   7 -12 170.787 51.6429   9
   5   7 -11 143.988 62.5468   9
   5   7 -10 190.010 72.3556   9
   5   7  -9 1435.08 148.978   5
   5   7  -9 1538.08 219.757   9
   5   7  -8 1325.51 156.117   5
   5   7  -8 1535.39 228.914   9
   5   7  -7-43.7182 57.3104   9
   5   7  -7 14.5893 33.4126   5
   5   7  -6 152.419 64.9621   9
   5   7  -5 791.041 122.327  10
   5   7  -5 1210.45 212.813   9
   5   7  -4 22.0630 7.77719  10
   5   7  -4 32.8248 18.9840   9
   5   7  -3 4482.31 294.739  10
   5   7  -3 5110.33 439.205   9
   5   7  -2 2031.52 213.384  10
   5   7  -1 660.295 113.206  10
   5   7   0 4995.83 315.324  10
   5   7   1 488.239 100.846  10
   5   7   2 17025.1 614.214  10
   5   7   2 17099.1 628.571   8
   5   7   3 888.890 144.202  10
   5   7   3 757.145 130.020   8
   5   7   4 7.47620 71.7204  10
   5   7   4 33.8747 11.4934   8
   5   7   5 381.895 94.3414  10
   5   7   5 394.396 102.536   8
   5   7   6 1206.79 165.527  10
   5   7   6 1094.18 173.136   8
   5   7   7 1268.78 168.396  10
   5   7   7 1101.31 172.896   8
   5   7   8 984.767 142.067  10
   5   7   8 849.571 146.164   8
   5   7   9 262.271 59.8562  10
   5   7   9 255.652 74.1451   8
   5   7  10 194.433 59.4701   8
   5   7  10 104.232 42.4951   4
   5   7  11 59.6291 30.0197   8
   5   7  12 11.3151 9.69041   8
   5   8 -11-32.4683 11.9494   9
   5   8 -10 42.2334 17.6407   9
   5   8  -9 156.638 63.5241   9
   5   8  -9 143.946 40.6247   5
   5   8  -8 715.607 104.377   5
   5   8  -8 822.162 150.079   9
   5   8  -7 96.3732 64.0543   9
   5   8  -7 149.739 52.2038   5
   5   8  -6 1105.50 190.420   9
   5   8  -5 531.201 87.6289  10
   5   8  -5 813.483 163.115   9
   5   8  -4 675.597 107.658  10
   5   8  -3 21.0409 18.9074  10
   5   8  -2 303.776 74.6103  10
   5   8  -1 528.720 98.6128  10
   5   8   0 666.104 116.053  10
   5   8   1 1381.61 176.180  10
   5   8   2 2498.92 238.977  10
   5   8   2 2238.30 230.516   8
   5   8   3 1717.94 200.128  10
   5   8   3 1578.62 200.015   8
   5   8   4 89.8875 38.6491  10
   5   8   4 16.5637 17.9672   8
   5   8   5 635.272 118.148  10
   5   8   5 559.041 115.777   8
   5   8   6-8.57247 15.5834  10
   5   8   6 30.9068 22.3273   8
   5   8   7 99.5996 48.9490  10
   5   8   7 37.1909 8.82754   8
   5   8   8 119.809 45.7749  10
   5   8   8 79.0237 29.3885   8
   5   8   9 309.176 73.4075   8
   5   8  10 322.275 68.1778   8
   5   8  11 112.034 34.7162   8
   5   9  -8 43.8136 24.1256   5
   5   9  -7-15.0206 19.8577   5
   5   9  -6 622.581 109.454   5
   5   9  -5 1002.86 115.129  10
   5   9  -4 247.598 64.8921  10
   5   9  -3 56.5451 32.7167  10
   5   9  -2 331.147 73.2204  10
   5   9  -1 2969.70 238.180  10
   5   9   0 1226.53 158.574  10
   5   9   1 1920.88 200.844  10
   5   9   2 1403.01 172.724  10
   5   9   2 1352.06 161.414   8
   5   9   3 551.768 107.265  10
   5   9   3 465.147 94.0343   8
   5   9   4 102.663 49.3483  10
   5   9   4 89.1544 43.8656   8
   5   9   5 181.512 59.2312  10
   5   9   5 154.140 54.0623   8
   5   9   6-8.58898 37.1913  10
   5   9   6 33.4382 28.2545   8
   5   9   7 95.7605 39.9790  10
   5   9   7 70.3449 36.9854   8
   5   9   8 175.958 38.2541  10
   5   9   8 195.960 50.4829   8
  -5  -9  -8 144.998 30.4677  12
   5   9   9 224.190 52.4163   8
   5  10  -7 48.3793 18.8946   5
   5  10  -6 521.029 82.7290   5
   5  10  -5 25.8628 20.1996  10
   5  10  -5-17.0634 23.0414   5
   5  10  -4 346.125 65.9225  10
   5  10  -3 311.939 67.3999  10
   5  10  -2 30.2004 22.4012  10
   5  10  -1 575.142 98.4353  10
   5  10   0 139.937 48.9110  10
   5  10   1 663.742 106.699  10
   5  10   2 1836.15 182.085  10
   5  10   3 545.522 95.0336  10
   5  10   3 500.923 84.2411   8
   5  10   4-5.13613 19.8412  10
   5  10   4 1.03690 7.83452   8
   5  10   5 477.998 85.3235  10
   5  10   5 455.837 80.6336   8
   5  10   6 3.06335 14.5270  10
   5  10   6 5.04904 14.0090   8
   5  10   7 323.967 57.8376   8
  -5 -10  -7 232.529 40.0346  12
   5  11  -5-23.0979 12.8078   5
   5  11  -4-19.9029 9.52937  10
   5  11  -4 17.9199 14.2401   5
   5  11  -3 17.3971 14.2646  10
   5  11  -3-13.5147 19.0734   5
   5  11  -2-1.71142 13.6288  10
   5  11  -2 3.76849 6.54666   5
   5  11  -1 62.6107 29.1159  10
   5  11  -1 64.7119 27.9690   5
   5  11   0-6.57973 7.97358  10
   5  11   0 9.90217 7.25894   5
   5  11   1 274.860 59.7676  10
   5  11   1 239.346 48.7914   5
   5  11   2-11.5164 22.3753  10
   5  11   3 905.814 105.448  10
   5  11   4 130.043 36.1694  10
   6 -13  -4 136.984 51.7032  11
   6 -13  -3 41.7608 20.8963  11
   6 -13  -2 192.074 45.4673  11
   6 -13  -1-0.85800 36.2449  11
   6 -13   0 9.23965 25.6779  11
   6 -13   1 147.014 38.7792   6
   6 -13   1 209.263 53.9553  11
   6 -13   2 2425.72 193.187  11
   6 -13   2 1985.10 145.495   6
   6 -13   3 2642.59 194.224  11
   6 -13   3 2014.80 148.708   6
   6 -13   4 737.853 91.0833  11
   6 -13   4 662.075 83.2369   6
   6 -13   5 19.0440 15.2984   6
   6 -12  -6 95.8819 67.9834  11
   6 -12  -5 2.90022 28.8396  11
   6 -12  -4 149.271 39.9370  11
   6 -12  -3-30.8715 45.7703  11
   6 -12  -2 4.76705 31.6367  11
   6 -12  -1 84.5205 31.3005  11
   6 -12   0 76.2406 27.2900   6
   6 -12   0 19.9624 35.2797  11
   6 -12   1 52.8047 26.1205  11
   6 -12   1 56.2942 21.6105   6
   6 -12   2 27.9843 22.2479   6
   6 -12   2 25.9253 23.7656  11
   6 -12   3 335.363 64.8165   6
   6 -12   3 475.548 110.719  11
   6 -12   4 20.8029 28.0082   6
   6 -12   4 4.27964 22.8086  11
   6 -12   5 594.823 113.289  11
   6 -12   5 529.925 94.8895   6
   6 -12   6 652.593 102.867  11
   6 -12   6 406.806 79.3393   6
   6 -12   7-20.7176 17.6355   6
   6 -12   7 2.07526 9.69780  11
   6 -12   8 6.43701 8.57112   6
   6 -11  -8 28.2373 19.6849  12
   6 -11  -7 323.810 99.7101  11
   6 -11  -6 27.2462 64.5356  11
   6 -11  -5-13.4984 50.2599  11
   6 -11  -4-0.54040 36.1805  11
   6 -11  -3 44.0702 30.6355  11
   6 -11  -2-4.00367 44.5338  11
   6 -11  -1 1314.94 207.431  11
   6 -11   0 529.414 94.3121   6
   6 -11   0 555.806 133.563  11
   6 -11   1 99.9614 49.4234   6
   6 -11   1 137.379 57.7357  11
   6 -11   2 300.452 77.6917   6
   6 -11   2 268.374 92.2908  11
   6 -11   3 1242.89 189.631  11
   6 -11   3 1316.96 167.439   6
   6 -11   4 464.191 108.843  11
   6 -11   5 41.8189 31.3534  11
   6 -11   6 191.338 67.7146  11
   6 -11   7 23.4332 20.5948  11
   6 -11   8-9.79586 19.6235  11
   6 -11   9 222.558 51.5775  11
   6 -10 -10 590.277 89.6278  12
   6 -10  -9 720.140 107.733  12
   6 -10  -8 12.6698 12.7218  12
   6 -10  -7 602.715 106.853  12
   6 -10  -7 852.118 167.912  11
   6 -10  -6 232.817 83.1382  11
   6 -10  -5 170.255 81.7000   7
   6 -10  -5 260.014 74.7797  11
   6 -10  -4-8.23117 58.6455   7
   6 -10  -4-9.06841 38.0832  11
   6 -10  -3 401.952 119.817   7
   6 -10  -3 329.668 109.771  11
   6 -10  -2-18.7686 44.5483   7
   6 -10  -2-1.67670 26.7185  11
   6 -10  -1 171.865 69.7392   7
   6 -10  -1 172.252 83.5737  11
   6 -10   0 98.2999 56.7744   7
   6 -10   0 57.4128 41.3455  11
   6 -10   1 193.986 56.1641   6
   6 -10   1 242.673 98.8870  11
   6 -10   2 492.654 139.090  11
   6 -10   3 1236.74 211.356  11
   6 -10   4 204.743 68.4708  11
   6 -10   5 858.191 169.470  11
   6 -10   6 77.8590 37.8052  11
   6 -10   7 608.750 129.097  11
   6 -10   7 797.434 124.932   4
   6 -10   8 226.539 80.4750  11
   6 -10   8 312.339 67.9555   4
   6 -10   9 391.865 93.9292  11
   6 -10   9 438.695 78.8354   4
   6 -10  10-13.0625 19.9688  11
   6  -9 -12 10.3975 16.2299  12
   6  -9 -11 15.4766 19.9048  12
   6  -9 -10 32.9676 29.5813  12
   6  -9  -9 603.613 114.599  12
   6  -9  -8 32.5504 23.3951  12
   6  -9  -8 208.547 81.9589  11
   6  -9  -7 102.298 42.3427  12
   6  -9  -7 101.173 3.49652  11
   6  -9  -6 77.2829 71.4027   7
   6  -9  -6 64.8075 23.4334  12
   6  -9  -6 69.5894 51.9398  11
   6  -9  -5 291.248 113.955   7
   6  -9  -5 141.072 60.5942  11
   6  -9  -4 10.9212 42.0791   7
   6  -9  -4 71.4627 38.1624  11
   6  -9  -3 1669.24 250.878   7
   6  -9  -3 1433.63 222.687  11
   6  -9  -2 912.311 185.241   7
   6  -9  -2 1055.87 192.254  11
   6  -9  -1-2.89701 7.71227   7
   6  -9  -1-47.3288 61.1974  11
   6  -9   0-8.44208 45.7373   7
   6  -9   0-10.5619 34.3659  11
   6  -9   1 3595.98 317.946   7
   6  -9   1 3354.03 358.687  11
   6  -9   2 176.278 78.7548  11
   6  -9   3 962.165 193.268  11
   6  -9   4 152.307 78.2937  11
   6  -9   5 609.178 149.700  11
   6  -9   6 69.9084 40.9417  11
   6  -9   7 4669.41 322.011   4
   6  -9   7 3958.89 381.427  11
   6  -9   8 3179.13 259.595   4
   6  -9   8 2997.78 318.867  11
   6  -9   9 48.3910 35.3036  11
   6  -9   9 111.073 46.8263   4
   6  -9  10 24.8064 7.43528  11
   6  -9  10-5.71166 25.3132   4
   6  -9  11 225.630 67.5137  11
   6  -9  11 221.248 52.4676   4
   6  -8 -13-4.06640 11.0126  12
   6  -8 -12 12.2982 18.4030  12
   6  -8 -11 145.228 55.8343  12
   6  -8 -10 8.53643 24.3955  12
   6  -8  -9 51.5437 37.5525  12
   6  -8  -8 110.937 87.5325   7
   6  -8  -8 42.4022 52.4169  12
   6  -8  -8 60.5918 66.8545  11
   6  -8  -7 86.3034 55.4488   7
   6  -8  -7 112.619 47.1456  12
   6  -8  -7 81.7684 47.3163  11
   6  -8  -6 2558.50 318.038   7
   6  -8  -6 2451.61 241.000  12
   6  -8  -6 2498.35 280.590  11
   6  -8  -5 11268.7 660.095   7
   6  -8  -5 11059.5 598.884  11
   6  -8  -4 100.867 65.5571   7
   6  -8  -4 52.9105 16.0144  11
   6  -8  -3 941.922 179.419   7
   6  -8  -3 1545.29 224.612  11
   6  -8  -2 443.098 127.533   7
   6  -8  -2 797.915 156.206  11
   6  -8  -1-60.0913 59.5176   7
   6  -8  -1 26.0044 37.3774  11
   6  -8   0 191.136 80.3918   7
   6  -8   0 114.065 41.4912  11
   6  -8   1 1806.35 446.619   3
   6  -8   1 1835.42 225.292   7
   6  -8   1 1648.28 242.174  11
   6  -8   2 1895.63 464.380   3
   6  -8   2 1820.47 253.057  11
   6  -8   3 1988.13 274.818  11
   6  -8   4 1230.10 217.283  11
   6  -8   5 2007.23 285.442  11
   6  -8   6 3.45796 20.2365  11
   6  -8   7 308.408 118.833  11
   6  -8   8 79.4935 53.1007  11
   6  -8   8 49.1632 25.4110   4
   6  -8   9 355.092 107.499  11
   6  -8   9 371.109 89.0968   4
   6  -8  10 312.915 95.5122  11
   6  -8  10 393.678 85.2217   4
   6  -8  11 65.3286 51.4591  11
   6  -8  11 121.624 46.9374   4
   6  -8  12 125.757 42.7622  11
   6  -8  12 188.751 46.5323   4
   6  -7 -13-10.3884 20.3164  12
   6  -7 -12 205.266 63.5584  12
   6  -7 -11 475.531 107.001  12
   6  -7 -10 319.702 91.2397  12
   6  -7  -9 64.0567 19.5723  12
   6  -7  -8 10.5606 31.4520   7
   6  -7  -8-40.2215 25.6081  12
   6  -7  -7 5440.27 453.945   7
   6  -7  -7 5109.73 368.952  12
   6  -7  -7 5667.03 400.493  11
   6  -7  -6 33924.8 1118.72   7
   6  -7  -6 33089.7 888.524  12
   6  -7  -6 33612.6 1037.48  11
   6  -7  -5 1894.41 258.759   7
   6  -7  -5 1988.42 202.856  12
   6  -7  -5 1938.46 231.415  11
   6  -7  -4 577.051 145.499   7
   6  -7  -4 501.531 111.688  11
   6  -7  -3 138.980 65.6524   7
   6  -7  -3 184.589 63.4642  11
   6  -7  -3 13.0200 130.286   3
   6  -7  -2-38.7343 97.2125   3
   6  -7  -2-34.7045 32.5229   7
   6  -7  -2 33.8097 7.17883  11
   6  -7  -1 61.4149 87.1610   3
   6  -7  -1 92.2005 20.0413   7
   6  -7  -1 142.882 63.7422  11
   6  -7   0 835.652 153.746   7
   6  -7   0 713.946 151.958  11
   6  -7   1 2295.59 514.356   3
   6  -7   1 2291.10 248.991   7
   6  -7   1 1515.34 218.825  11
   6  -7   2 1874.13 494.158   3
   6  -7   2 1733.33 207.511   7
   6  -7   2 1019.09 183.306  11
   6  -7   3 64.5714 37.0537  11
   6  -7   3 260.162 195.524   3
   6  -7   4 1783.31 432.657   3
   6  -7   4 1539.01 237.631  11
   6  -7   5 1302.58 196.571   8
   6  -7   5 1389.38 229.846  11
   6  -7   6 122.219 68.3249  11
   6  -7   6 116.370 51.9766   8
   6  -7   7 37.7688 26.5341   8
   6  -7   8 140.287 71.8443   8
   6  -7   9 34.3734 39.7502   4
   6  -7  10 32.8400 32.9483   4
   6  -7  11 361.696 102.442  11
   6  -7  11 276.035 69.6363   4
   6  -7  12 244.184 82.2579  11
   6  -7  12 301.617 65.7443   4
   6  -7  13-2.67336 32.0357  11
   6  -6 -14 30.1467 6.73493  12
   6  -6 -13 70.5405 33.1522  12
   6  -6 -12 9.52791 15.9198  12
   6  -6 -11 84.8905 51.1895  12
   6  -6 -10 24.1653 23.8339  12
   6  -6  -9-21.2940 35.7102   7
   6  -6  -9 12.4730 36.4086  12
   6  -6  -8 47.4436 21.8524   7
   6  -6  -8 102.351 47.9234  12
   6  -6  -8 36.6429 48.7701  11
   6  -6  -7 1260.56 178.942   5
   6  -6  -7 1349.13 214.752   7
   6  -6  -7 1531.34 197.162  12
   6  -6  -7 1337.82 177.938  11
   6  -6  -6 381.379 111.772   7
   6  -6  -6 314.207 83.6788   5
   6  -6  -6 347.997 88.3119  12
   6  -6  -6 293.968 73.7057  11
   6  -6  -5 529.142 114.859   5
   6  -6  -5 569.671 136.352   7
   6  -6  -5 482.364 94.3941  12
   6  -6  -5 468.032 110.825  11
   6  -6  -4 65.7525 34.4644   5
   6  -6  -4 9.07588 19.5966   7
   6  -6  -4 82.9010 37.6744  11
   6  -6  -3 611.259 119.940   5
   6  -6  -3 958.359 320.857   3
   6  -6  -3 643.177 135.290   7
   6  -6  -3 1041.68 162.295  11
   6  -6  -2 1346.80 175.568   5
   6  -6  -2 1353.15 195.619   7
   6  -6  -2 1302.84 185.824  11
   6  -6  -1 1577.16 182.776   5
   6  -6  -1 1510.13 203.588   7
   6  -6   0 1170.00 349.605   3
   6  -6   1 2622.64 543.785   3
   6  -6   1 1280.67 188.489  11
   6  -6   2 241.184 87.7847  11
   6  -6   2 437.773 185.954   3
   6  -6   2 347.423 87.1542   8
   6  -6   3 192.576 82.7349  11
   6  -6   3 406.749 186.839   3
   6  -6   3 267.004 74.6016   8
   6  -6   4 79.4091 45.0907  11
   6  -6   4 190.787 159.203   3
   6  -6   4 174.015 66.0330   8
   6  -6   5 84.9598 190.682   3
   6  -6   5 152.114 71.9713   8
   6  -6   6 1989.13 240.879   8
   6  -6   7 56.1593 39.3090   8
   6  -6   8 2030.55 249.699   8
   6  -6   9 165.117 68.5663   8
   6  -6   9 224.329 75.9047   4
   6  -6  10 26.1807 22.7783   4
   6  -6  10 9.19747 22.7126   8
   6  -6  11 23.3503 8.97013   8
   6  -6  11 25.4486 39.0235   4
   6  -6  12 34.9757 21.1588   4
   6  -6  13-24.4266 28.2916   4
   6  -6  14 134.784 50.8032  11
   6  -5 -14 16.1242 7.44014  12
   6  -5 -13 104.837 48.7236  12
   6  -5 -12 102.563 58.6618  12
   6  -5 -11 182.397 75.2372  12
   6  -5 -10 184.480 72.9898  12
   6  -5  -9 72.8259 39.7157   5
   6  -5  -9 195.776 83.9890   7
   6  -5  -9 160.739 58.9541  12
   6  -5  -8 292.848 86.8764   5
   6  -5  -8 285.665 103.485   7
   6  -5  -8 428.254 112.384  12
   6  -5  -8 345.117 108.643  11
   6  -5  -7 784.235 138.346   5
   6  -5  -7 739.486 146.665   7
   6  -5  -7 730.997 134.473  12
   6  -5  -7 592.794 117.942  11
   6  -5  -6 237.623 59.8123   5
   6  -5  -6 433.290 113.565   7
   6  -5  -6 387.109 93.7122  12
   6  -5  -6 253.390 48.1661  11
   6  -5  -5 51.3850 43.9281   5
   6  -5  -5 38.2982 67.9082   3
   6  -5  -5 20.8298 35.5097   7
   6  -5  -5 44.1713 41.5239  12
   6  -5  -5-3.93544 37.2260  11
   6  -5  -4 1921.96 209.766   5
   6  -5  -4 1943.66 232.201   7
   6  -5  -3 1498.33 412.032   3
   6  -5  -2 341.807 173.781   3
   6  -5  -1 3952.99 621.613   3
   6  -5   0 1104.64 305.029   3
   6  -5   1-99.1228 114.739   3
   6  -5   2 263.320 159.071   3
   6  -5   3 2139.43 457.951   3
   6  -5   4 2442.34 476.662   3
   6  -5   4 1376.76 179.619   8
   6  -5   5 530.209 261.579   3
   6  -5   5 289.621 82.6478   8
   6  -5   6-5.10336 19.5008   8
   6  -5   7 46.7215 43.1865   8
   6  -5   8-24.0950 39.2643   8
   6  -5   9 1058.53 178.201   8
   6  -5  10 1873.77 232.171   8
   6  -5  10 1977.06 215.546   4
   6  -5  11 82.4511 50.5967   8
   6  -5  11 75.0253 25.2548   4
   6  -5  12 173.380 64.5341   8
   6  -5  12 197.946 62.8259   4
   6  -5  13 197.763 48.6274   4
   6  -4 -14 14.6662 10.3378  12
   6  -4 -13 65.7616 36.4194  12
   6  -4 -12 88.0776 51.6097  12
   6  -4 -11 310.464 97.0312  12
   6  -4 -10 85.0185 52.8569  12
   6  -4  -9 125.855 49.7648   5
   6  -4  -9 184.246 76.8158  12
   6  -4  -8 35.8189 22.5988   5
   6  -4  -8 19.1753 31.8606   7
   6  -4  -8 32.9978 45.1725  12
   6  -4  -7 90.8147 41.3838   5
   6  -4  -7-11.4597 42.0856  12
   6  -4  -7-11.2914 35.5567   7
   6  -4  -6-25.9840 25.3713   5
   6  -4  -6 53.3904 47.5554   7
   6  -4  -6-28.2905 37.0224  12
   6  -4  -5 53.9800 21.4661   5
   6  -4  -5 154.823 130.901   3
   6  -4  -5 26.1947 20.4092   7
   6  -4  -4 303.424 157.889   3
   6  -4  -3 1916.54 409.783   3
   6  -4  -2 5910.89 728.642   3
   6  -4  -1 996.110 307.842   3
   6  -4   0 1958.50 408.303   3
   6  -4   1 2087.25 413.943   3
   6  -4   2 452.274 196.929   3
   6  -4   3 683.525 252.109   3
   6  -4   4 3.06304 75.1648   3
   6  -4   5 621.223 238.878   3
   6  -4   5 408.317 99.1450   8
   6  -4   6 149.287 54.7014   3
   6  -4   6 180.639 73.7196   8
   6  -4   7 5597.18 404.022   8
   6  -4   8 3915.82 343.431   8
   6  -4   9 2203.80 262.654   8
   6  -4  10 755.730 147.973   8
   6  -4  10 829.756 132.346   4
   6  -4  11 298.250 77.7953   4
   6  -4  11 316.727 93.0648   8
   6  -4  12 47.0731 28.8519   8
   6  -4  12 37.9549 9.65036   4
   6  -4  13 63.6611 27.0912   8
   6  -4  13 39.0058 21.9966   4
   6  -4  14 264.430 55.4704   4
   6  -3 -15 26.1168 10.8162  12
   6  -3 -14 364.316 84.7951  12
   6  -3 -13 1024.34 158.672  12
   6  -3 -12 22.6978 15.8859  12
   6  -3 -11 136.602 62.9798  12
   6  -3 -10 28.1701 38.3628  12
   6  -3  -9 357.035 82.8710   5
   6  -3  -9 229.538 87.5247  12
   6  -3  -8 3706.97 291.846   5
   6  -3  -8 3769.43 327.696  12
   6  -3  -7 135.505 49.4737   5
   6  -3  -7 190.601 71.8849   7
   6  -3  -7 135.414 59.0456  12
   6  -3  -6 1817.91 195.105   5
   6  -3  -6 1617.60 199.958   7
   6  -3  -6 1789.55 202.614  12
   6  -3  -5 494.543 205.592   3
   6  -3  -4 689.616 244.331   3
   6  -3  -3 428.922 193.398   3
   6  -3  -2 1634.44 353.139   3
   6  -3  -1 2787.06 451.125   3
   6  -3   0 701.375 222.886   3
   6  -3   1 339.505 169.721   3
   6  -3   2 167.089 105.698   3
   6  -3   3 336.074 164.832   3
   6  -3   4 4496.03 583.733   3
   6  -3   5 151.413 104.104   3
   6  -3   6 170.667 123.790   3
   6  -3   6 75.7221 50.9906   8
   6  -3   7-29.9438 36.4650   8
   6  -3   8 114.350 59.1175   8
   6  -3   9 3604.71 330.491   8
   6  -3  10 29.3432 15.8347   8
   6  -3  11 1811.02 225.936   8
   6  -3  11 1834.02 195.257   4
   6  -3  12 107.599 53.7354   8
   6  -3  12 20.5232 15.1080   4
   6  -3  13 16.1318 27.0172   4
   6  -3  13 76.9100 46.7942   8
   6  -3  14 20.5488 14.2562   8
   6  -3  14-14.3979 24.5831   4
   6  -2 -15 1353.42 131.562  12
   6  -2 -14 1429.63 165.312  12
   6  -2 -13 87.7890 44.6855  12
   6  -2 -12-12.7927 16.1673  12
   6  -2 -11-9.26813 12.8239  12
   6  -2 -10 174.243 81.9704  12
   6  -2  -9 2627.75 236.168   5
   6  -2  -9 2935.45 303.970  12
   6  -2  -8 9241.28 449.468   5
   6  -2  -8 9644.53 526.963  12
   6  -2  -7 4811.54 314.774   5
   6  -2  -7 5130.56 364.395  12
   6  -2  -6 198.117 63.7173   5
   6  -2  -6 57.0142 34.7877  12
   6  -2  -5 216.375 56.7252   3
   6  -2  -4 30.6902 55.7003   3
   6  -2  -3 893.516 246.786   3
   6  -2  -2 6826.79 681.440   3
   6  -2  -1 4868.10 589.450   3
   6  -2   0 637.040 197.778   3
   6  -2   1 5313.01 633.905   3
   6  -2   2 5351.07 658.194   3
   6  -2   3 1781.88 381.118   3
   6  -2   4 2.10880 16.4722   3
   6  -2   5 292.954 168.875   3
   6  -2   6 4.23835 56.8317   3
   6  -2   6-25.1118 30.3656   8
   6  -2   7 867.346 154.218   8
   6  -2   8 16339.4 707.032   8
   6  -2   9 4162.53 363.415   8
   6  -2  10 2093.31 254.249   8
   6  -2  11 546.055 123.245   8
   6  -2  11 521.767 102.870   4
   6  -2  12-1.40350 17.1045   8
   6  -2  12-6.86290 12.4102   4
   6  -2  13 544.497 100.800   8
   6  -2  13 541.430 91.8139   4
   6  -2  14 273.752 61.7500   8
   6  -2  14 179.974 42.9114   4
   6  -1 -15 1594.34 140.977  12
   6  -1 -14 691.418 115.174  12
   6  -1 -13 27.8549 27.9436  12
   6  -1 -12 88.6089 54.6838  12
   6  -1 -11 28.9205 26.1659  12
   6  -1 -10 17.9986 26.0817  12
   6  -1  -9 97.5178 54.4757   5
   6  -1  -9 91.4632 59.4133  12
   6  -1  -8 386.078 88.8416   5
   6  -1  -8 335.849 95.5352  12
   6  -1  -7 214.269 65.6154   5
   6  -1  -7 285.268 80.1972  12
   6  -1  -6 564.038 97.9716   5
   6  -1  -6 573.596 113.857  12
   6  -1  -4 731.885 214.441   3
   6  -1  -3 306.680 138.546   3
   6  -1  -2-53.7589 79.1634   3
   6  -1  -1 2405.28 416.038   3
   6  -1   0 20639.3 1219.83   3
   6  -1   1 502.963 187.995   3
   6  -1   2 6593.53 673.600   3
   6  -1   3 123.928 29.2092   3
   6  -1   4 614.111 218.887   3
   6  -1   5-24.4876 98.1174   3
   6  -1   6 2216.70 221.946  10
   6  -1   6 1953.57 219.263   8
   6  -1   7 175.166 61.2236  10
   6  -1   7 115.111 110.901   3
   6  -1   7 214.205 73.6657   8
   6  -1   8 20121.0 781.119   8
   6  -1   9 16884.9 746.334   8
   6  -1  10 1823.58 246.224   8
   6  -1  11 198.888 73.5074   8
   6  -1  11 221.740 66.4700   4
   6  -1  12 372.899 92.9652   8
   6  -1  12 343.447 79.9684   4
   6  -1  13 42.2473 34.6677   8
   6  -1  13-9.93563 16.4918   4
   6  -1  14 170.678 45.1491   8
   6   0 -14 10.5185 17.1571  12
   6   0 -13 299.351 70.3542   9
   6   0 -13 406.868 99.7069  12
   6   0 -12 169.356 68.1922  12
   6   0 -12 110.242 48.4416   9
   6   0 -11 883.389 148.476   9
   6   0 -11 909.428 169.984  12
   6   0 -10 52.9766 6.36637   9
   6   0 -10 110.317 49.6900  12
   6   0  -9 540.016 106.323   5
   6   0  -9 420.773 100.797   9
   6   0  -9 578.426 135.816  12
   6   0  -8 802.077 126.433   5
   6   0  -8 751.899 136.888   9
   6   0  -8 851.596 156.686  12
   6   0  -7 2346.16 217.310   5
   6   0  -7 2177.48 224.852   9
   6   0  -7 1701.74 213.800  12
   6   0  -6-38.8366 30.1251   5
   6   0  -6-4.97819 17.1235  12
   6   0  -4 619.586 187.313   3
   6   0  -3 839.861 231.311   3
   6   0  -2 349.195 150.834   3
   6   0  -1 2148.76 365.594   3
   6   0   0 1251.17 279.415   3
   6   0   1 1473.11 306.719   3
   6   0   2 2911.60 446.550   3
   6   0   3 526.959 190.498   3
   6   0   4 609.776 209.743   3
   6   0   5 864.647 130.513  10
   6   0   5 1085.89 274.105   3
   6   0   6 4390.38 322.361  10
   6   0   6 4309.87 326.537   8
   6   0   7 755.468 135.808  10
   6   0   7 1309.79 190.998   8
   6   0   7 1156.63 295.807   3
   6   0   8 873.653 148.492  10
   6   0   8 1361.20 202.007   8
   6   0   9 5772.94 425.880   8
   6   0  10 3368.08 327.548   8
   6   0  11 37.0505 26.0680   8
   6   0  12 369.293 101.446   8
   6   0  12 181.677 56.1677   4
   6   0  13-5.40650 14.9923   8
   6   0  13 4.96839 17.1661   4
   6   0  14 181.963 44.2689   8
   6   1 -14 156.625 44.8220   9
   6   1 -14 291.183 70.6853  12
   6   1 -13 2243.99 214.714   9
   6   1 -13 2459.92 252.788  12
   6   1 -12 413.318 99.3932   9
   6   1 -12 529.113 126.094  12
   6   1 -11 163.020 69.6686  12
   6   1 -11 91.6570 42.0733   9
   6   1 -10 637.048 130.219   9
   6   1 -10 771.491 157.993  12
   6   1  -9 1040.48 141.665   5
   6   1  -9 999.824 167.216   9
   6   1  -9 1005.29 176.399  12
   6   1  -8-45.2255 47.1872   5
   6   1  -8-1.04250 20.6790   9
   6   1  -8 54.0252 34.0394  12
   6   1  -7 309.706 91.8019   9
   6   1  -7 369.777 89.0305   5
   6   1  -7 369.443 101.219  12
   6   1  -6 209.296 79.9591  12
   6   1  -6 213.727 80.5807   9
   6   1  -6 292.852 77.9952   5
   6   1  -5 372.068 80.1245   5
   6   1  -5 365.374 87.6545  12
   6   1  -4 351.349 122.400   3
   6   1  -3 98.7821 69.4836   3
   6   1  -2 999.066 244.788   3
   6   1  -1 10660.0 820.408   3
   6   1   0 3716.38 492.281   3
   6   1   1 5912.95 649.143   3
   6   1   2 7368.05 731.897   3
   6   1   3 17.2828 45.7521   3
   6   1   4 382.670 159.457   3
   6   1   5 88.3305 57.8983  10
   6   1   5 57.1109 36.9427   3
   6   1   5 2.90782 8.79241   8
   6   1   6 1895.93 378.720   3
   6   1   6 1485.46 189.502   8
   6   1   6 1405.34 183.312  10
   6   1   7 89.0381 49.3347  10
   6   1   7 264.995 94.3548   3
   6   1   7 131.097 60.7611   8
   6   1   8 493.240 108.875  10
   6   1   8 800.032 151.163   8
   6   1   9 47.2343 22.4488  10
   6   1   9 100.776 74.6069   8
   6   1  10 2056.37 249.520   8
   6   1  11 310.505 96.8858   8
   6   1  12 71.2757 40.0304   8
   6   1  13-24.6245 16.5683   8
   6   1  14 66.3665 27.8672   8
   6   2 -14 302.352 66.4821   9
   6   2 -13 312.438 77.8933   9
   6   2 -13 362.658 93.4856  12
   6   2 -12 64.8247 47.6456   9
   6   2 -12 121.800 48.0131  12
   6   2 -11 103.797 51.4901   9
   6   2 -11 27.1407 14.6141  12
   6   2 -10 469.142 117.878   9
   6   2 -10 445.816 126.579  12
   6   2  -9 1094.33 147.812   5
   6   2  -9 972.305 172.782   9
   6   2  -9 1144.95 201.990  12
   6   2  -8 245.150 79.3216  12
   6   2  -8 226.870 84.0455   9
   6   2  -8 289.368 76.1323   5
   6   2  -7 94.4812 47.8711   9
   6   2  -7 115.623 48.1986   5
   6   2  -7 139.203 58.6509  12
   6   2  -6 1532.33 179.607   5
   6   2  -6 1520.14 209.563   9
   6   2  -6 1417.79 204.592  12
   6   2  -5 289.923 87.2272   9
   6   2  -5 192.079 56.5375   5
   6   2  -5 245.777 80.3183  12
   6   2  -4 147.540 49.7526   9
   6   2  -4 104.811 48.8624   5
   6   2  -4 125.722 62.9477  12
   6   2  -3 255.068 129.897   3
   6   2  -2 1243.52 284.247   3
   6   2  -1 8468.00 769.429   3
   6   2   0 742.758 228.663   3
   6   2   1 4890.22 609.330   3
   6   2   2 53.8536 79.9648   3
   6   2   3 1465.08 350.149   3
   6   2   4 4429.55 613.680   3
   6   2   4 4107.61 283.311   8
   6   2   5 3107.81 275.426  10
   6   2   5 4336.95 604.922   3
   6   2   5 4408.45 309.018   8
   6   2   6 38.5820 45.6554  10
   6   2   6 156.567 88.8338   3
   6   2   6 79.9181 25.0988   8
   6   2   7 523.519 111.509  10
   6   2   7 698.665 133.140   8
   6   2   7 585.034 182.111   3
   6   2   8 168.214 59.4985  10
   6   2   8 165.929 59.3356   8
   6   2   9 30.5210 32.5955  10
   6   2   9 55.3875 26.0954   8
   6   2  10 1170.68 186.290   8
   6   2  11 1119.43 177.696   8
   6   2  12 12.4528 11.2985   8
   6   2  13 225.529 60.0365   8
   6   2  14 100.268 28.6307   8
   6   3 -14 9.22947 17.1497   9
   6   3 -13 16.9741 27.3072   9
   6   3 -12-49.8052 30.3957   9
   6   3 -12-23.0624 46.1020  12
   6   3 -11 3861.42 340.448   9
   6   3 -11 4146.76 366.083  12
   6   3 -10 491.646 130.132   9
   6   3 -10 487.071 128.479  12
   6   3  -9 796.286 127.750   5
   6   3  -9 822.991 162.120   9
   6   3  -9 781.859 168.475  12
   6   3  -8 2226.54 222.069   5
   6   3  -8 2148.61 270.973   9
   6   3  -8 2331.07 292.905  12
   6   3  -7 152.572 76.0921   9
   6   3  -7 257.071 72.3535   5
   6   3  -7 132.619 61.6313  12
   6   3  -6 2117.14 222.460   5
   6   3  -6 1869.25 246.809   9
   6   3  -6 1830.52 249.057  12
   6   3  -5 1685.37 185.908   5
   6   3  -5 1523.05 225.442  12
   6   3  -5 1742.89 230.005   9
   6   3  -5 1160.59 294.115   2
   6   3  -4 9.25806 29.5343  12
   6   3  -4-32.7115 49.8443   9
   6   3  -4 15.5506 24.0173   5
   6   3  -4 22.0112 38.7568   2
   6   3  -3 1363.41 159.695   5
   6   3  -3 1162.27 185.334  12
   6   3  -3 2063.47 356.719   3
   6   3  -3 1281.64 195.355   9
   6   3  -3 1776.23 368.934   2
   6   3  -2 459.722 112.241   9
   6   3  -2 259.268 61.5048   5
   6   3  -2 473.828 179.012   3
   6   3  -1 8056.45 486.399   9
   6   3  -1 10122.7 878.600   3
   6   3   0 842.834 252.924   3
   6   3   2-2.12699 2.47336  10
   6   3   3 1894.28 199.325  10
   6   3   3 2647.78 225.390   8
   6   3   4 976.209 147.750  10
   6   3   4 1429.75 174.994   8
   6   3   4 1120.80 294.670   3
   6   3   5-0.26526 4.06546  10
   6   3   5-48.3517 132.116   3
   6   3   5-19.3656 40.4574   8
   6   3   6 940.999 153.833  10
   6   3   6 1373.57 184.769   8
   6   3   6 1179.00 312.652   3
   6   3   7 275.343 77.8796  10
   6   3   7 232.968 85.4903   8
   6   3   8 95.5877 41.4505  10
   6   3   8 84.0008 32.0842   8
   6   3   9-17.4696 43.0805  10
   6   3   9 8.39684 22.6418   8
   6   3  10 1794.75 194.190  10
   6   3  10 1771.31 225.307   8
   6   3  11-16.2174 15.0577   8
   6   3  12-0.21775 5.46962   8
   6   3  13 1319.72 140.785   8
   6   4 -13-30.7032 29.7806   9
   6   4 -12 468.600 101.295   9
   6   4 -11 1.13086 32.2087   9
   6   4 -10-37.6491 27.2099   5
   6   4 -10-3.32939 22.4027   9
   6   4 -10-32.3526 49.3805  12
   6   4  -9 27.1196 37.1692   9
   6   4  -9 7.31899 13.7858   5
   6   4  -9 66.6144 48.4818  12
   6   4  -8 67.3846 59.3521   9
   6   4  -8 58.4507 26.5071   5
   6   4  -8 38.5608 21.6884  12
   6   4  -7 938.467 147.689   5
   6   4  -7 833.378 172.281   9
   6   4  -7 782.856 171.029  12
   6   4  -6 3859.84 296.713   5
   6   4  -6 3993.12 376.524   9
   6   4  -6 3806.17 384.349  12
   6   4  -5 251.216 87.2617   9
   6   4  -5 408.277 90.9126   5
   6   4  -5 333.767 96.6241  12
   6   4  -5 239.241 103.586   2
   6   4  -4-12.0326 27.1449   9
   6   4  -4 16.2585 17.5815   5
   6   4  -4-57.5083 37.6190   2
   6   4  -3 4.52165 14.8444   9
   6   4  -2 166.175 50.9546  10
   6   4  -2 175.449 74.9781   9
   6   4  -2 191.082 128.806   3
   6   4  -1 1440.69 157.418  10
   6   4  -1 1241.10 311.442   3
   6   4   0 7226.73 359.661  10
   6   4   1 3096.83 244.921  10
   6   4   2 310.548 80.2090  10
   6   4   3 4675.15 324.210  10
   6   4   3 4629.01 310.985   8
   6   4   4 312.061 75.8980  10
   6   4   4 345.025 88.6226   8
   6   4   5 3315.12 294.307  10
   6   4   5 2847.61 263.474   8
   6   4   6 1375.92 190.197  10
   6   4   6 1057.98 166.389   8
   6   4   7-8.76737 22.7449  10
   6   4   7-27.6336 55.3950   8
   6   4   8 294.506 83.8212  10
   6   4   8 327.659 92.9195   8
   6   4   9 560.704 111.622  10
   6   4   9 500.453 118.803   8
   6   4  10 412.109 87.0999  10
   6   4  10 403.378 98.0718   8
   6   4  11 52.8291 29.7358   8
   6   4  12 612.091 104.071   8
   6   4  13 345.068 63.7338   8
   6   5 -13 34.6266 26.2018   9
   6   5 -12 40.6555 29.6423   9
   6   5 -11 2.04849 27.5625   9
   6   5 -10 131.500 56.2759   9
   6   5 -10 81.8074 32.6818   5
   6   5  -9 717.529 113.962   5
   6   5  -9 744.620 153.544   9
   6   5  -8 1055.37 148.637   5
   6   5  -8 1188.93 205.404   9
   6   5  -7 5842.79 373.832   5
   6   5  -7 6040.00 476.741   9
   6   5  -6 1151.48 163.399   5
   6   5  -6 1295.50 216.736   9
   6   5  -5 55.1189 48.1096   9
   6   5  -5-10.7242 37.0110   5
   6   5  -4 685.174 152.939   9
   6   5  -4 633.022 251.287   2
   6   5  -3 4887.82 281.741  10
   6   5  -3 4333.04 393.198   9
   6   5  -2 9079.77 397.008  10
   6   5  -2 8992.09 576.028   9
   6   5  -1 59904.4 1058.75  10
   6   5   0 17374.6 588.646  10
   6   5   1 747.727 124.481  10
   6   5   2 6.04915 16.6306  10
   6   5   3 81.7928 49.6319  10
   6   5   3 2.58662 23.8454   8
   6   5   4 3739.78 309.253  10
   6   5   4 3618.54 289.474   8
   6   5   5 130.123 47.0819  10
   6   5   5 5.82218 22.8793   8
   6   5   6 218.492 60.8276  10
   6   5   6 301.292 82.0472   8
   6   5   7 1981.54 231.784  10
   6   5   7 1766.42 212.155   8
   6   5   8 1504.16 187.582  10
   6   5   8 1289.51 177.296   8
   6   5   9 263.550 73.1768  10
   6   5   9 268.301 82.5660   8
   6   5  10 3.47096 11.5988  10
   6   5  10-69.1791 39.3909   8
   6   5  11 552.127 96.0402   8
   6   5  12 1080.68 123.142   8
   6   6 -12 30.2488 17.3266   9
   6   6 -11 159.060 58.7932   9
   6   6 -10 49.0653 26.4102   9
   6   6  -9 1936.25 175.046   5
   6   6  -9 1981.94 249.004   9
   6   6  -8 224.349 96.4180   9
   6   6  -8 201.535 62.5918   5
   6   6  -7 5796.47 357.188   5
   6   6  -7 6148.15 474.990   9
   6   6  -6 297.766 108.114   9
   6   6  -6 211.647 61.2571   5
   6   6  -5 218.678 83.2946   9
   6   6  -5 246.455 77.3416   5
   6   6  -4 40.1582 29.5837   9
   6   6  -3 1078.90 137.658  10
   6   6  -3 1021.95 200.380   9
   6   6  -2 335.443 89.2716  10
   6   6  -1 329.362 83.3788  10
   6   6   0 9436.50 446.923  10
   6   6   1 13684.5 554.709  10
   6   6   2 243.362 68.2677  10
   6   6   3 309.231 84.5987  10
   6   6   3 281.287 74.5592   8
   6   6   4 883.332 147.894  10
   6   6   4 907.033 143.537   8
   6   6   5 17.1927 28.7240  10
   6   6   5-0.37465 18.6103   8
   6   6   6 975.303 158.892  10
   6   6   6 812.727 133.978   8
   6   6   7 5.57726 34.8805  10
   6   6   7 10.9077 14.0852   8
   6   6   8 474.894 102.870  10
   6   6   8 558.104 114.068   8
   6   6   9 24.3975 23.7706  10
   6   6   9 36.3110 34.3778   8
   6   6  10 48.8750 26.4383  10
   6   6  10 33.3513 21.3609   8
   6   6  11 67.6193 37.7901   8
   6   6  12-23.2001 9.81722   8
   6   7 -11 192.330 50.4088   9
   6   7 -10-12.6635 22.5828   9
   6   7  -9 37.8242 27.8222   9
   6   7  -9 5.09433 18.2328   5
   6   7  -8 202.861 76.8600   9
   6   7  -8 270.692 64.6367   5
   6   7  -7 197.483 76.9128   9
   6   7  -7 217.297 66.6429   5
   6   7  -6 166.750 72.2582   9
   6   7  -6 115.202 48.5295   5
   6   7  -5 268.018 88.5490   9
   6   7  -5 176.757 62.9186   5
   6   7  -4 128.131 44.2023  10
   6   7  -3 106.136 45.3675  10
   6   7  -2 1150.11 155.475  10
   6   7  -1 2059.55 210.498  10
   6   7   0 400.359 88.6163  10
   6   7   1 1701.72 202.364  10
   6   7   2 482.293 100.025  10
   6   7   3 166.860 66.9959  10
   6   7   3 129.368 45.3217   8
   6   7   4 440.670 104.310  10
   6   7   4 435.252 101.842   8
   6   7   5 1661.14 203.821  10
   6   7   5 1283.55 169.166   8
   6   7   6 751.650 128.999  10
   6   7   6 728.932 123.886   8
   6   7   7 247.678 77.3690  10
   6   7   7 242.249 69.1642   8
   6   7   8-47.4383 33.9445  10
   6   7   8-35.1658 36.6110   8
   6   7   9-2.17104 18.3312  10
   6   7   9 8.73180 29.4272   8
   6   7  10 192.317 52.2668   8
   6   7  11 15.7419 9.36470   8
   6   8  -9 125.332 28.8853   5
   6   8  -8 607.249 84.6232   5
   6   8  -7 10.1184 21.6602   5
   6   8  -6 583.621 99.5476   5
   6   8  -5 194.288 57.9792   5
   6   8  -4 142.504 43.4176  10
   6   8  -4 150.153 55.6100   5
   6   8  -3 3359.72 257.742  10
   6   8  -2 57.5678 32.2211  10
   6   8  -1 1424.26 172.186  10
   6   8   0 116.910 47.8899  10
   6   8   1-3.06318 4.18192  10
   6   8   2 38.0406 19.9179  10
   6   8   2 82.4071 21.3754   5
   6   8   3 153.291 59.2822  10
   6   8   3 180.590 57.8545   8
   6   8   4-3.30092 14.8671  10
   6   8   4 13.8204 24.0941   8
   6   8   5 703.314 119.967  10
   6   8   5 574.985 99.8551   8
   6   8   6 31.6041 9.68216  10
   6   8   6 13.0834 17.2545   8
   6   8   7 593.414 97.3968  10
   6   8   7 398.459 80.1416   8
   6   8   8 733.740 91.7035  10
   6   8   8 755.205 103.656   8
   6   8   9 29.6051 29.0089   8
   6   9  -7 155.630 38.5696   5
   6   9  -6 74.2132 30.6747   5
   6   9  -5 9.02101 16.2623   5
   6   9  -4 456.565 77.1906  10
   6   9  -4 466.149 84.8390   5
   6   9  -3 38.3897 21.4504  10
   6   9  -3 86.7935 36.1735   5
   6   9  -2 52.5610 25.4492  10
   6   9  -2 0.25080 31.6830   5
   6   9  -1 46.6768 33.1259  10
   6   9  -1 9.43859 15.9200   5
   6   9   0 361.070 80.6412  10
   6   9   0 336.217 69.0516   5
   6   9   1 135.129 48.2945  10
   6   9   1 147.678 48.1596   5
   6   9   2 69.5956 32.8990  10
   6   9   2 61.9331 21.6138   5
   6   9   3 561.901 108.244  10
   6   9   4 672.182 112.762  10
   6   9   4 619.818 86.4529   8
   6   9   5 91.9947 44.3518  10
   6   9   5 101.967 41.4967   8
   6   9   6 42.6435 25.1795  10
   6   9   6 1.17015 5.76921   8
   6   9   7 126.645 33.9426  10
   6   9   7 75.6380 28.8372   8
   6  10  -6 11.7232 13.0647   5
   6  10  -5 1016.91 102.192   5
   6  10  -4 315.590 60.4740   5
   6  10  -3 258.109 49.6604  10
   6  10  -3 301.147 61.1127   5
   6  10  -2 1008.76 113.363  10
   6  10  -2 1013.87 113.612   5
   6  10  -1 19.6917 12.7201  10
   6  10  -1 20.1859 19.8317   5
   6  10   0 288.472 63.1969  10
   6  10   0 268.238 52.6690   5
   6  10   1 207.605 56.5353  10
   6  10   1 190.103 43.4246   5
   6  10   2 30.1699 24.7796  10
   6  10   3 378.155 70.8016  10
   6  10   4 66.2799 30.4324  10
   6  10   5 202.457 42.7629  10
   6  11   0 612.618 71.0673  10
   6  11   1 789.315 82.3269  10
   7 -13  -4 20.9862 29.0646  11
   7 -13  -3 39.9079 43.6093  11
   7 -13  -2-0.14463 30.5987  11
   7 -13  -1-8.83578 34.6408  11
   7 -13   0-5.66666 24.6293  11
   7 -13   1 142.542 49.4264  11
   7 -13   2 773.286 101.631  11
   7 -13   3 1048.56 110.915  11
   7 -13   4 167.809 41.1841  11
   7 -12  -6-80.8554 70.6494  11
   7 -12  -5 28.0049 38.2259  11
   7 -12  -4 78.3584 7.38409  11
   7 -12  -3 16.5225 26.3108  11
   7 -12  -2 89.4875 32.4369  11
   7 -12  -1 302.381 73.3861  11
   7 -12   0 33.9988 15.7568  11
   7 -12   1 192.237 69.7400  11
   7 -12   2 470.909 101.735  11
   7 -12   3 323.036 83.9111  11
   7 -12   4 188.563 46.8739   6
   7 -12   4 217.231 67.9034  11
   7 -12   5 335.756 62.2319   6
   7 -12   5 370.658 82.6542  11
   7 -12   6 6.57484 11.0857   6
   7 -12   6-35.7716 27.6945  11
   7 -11  -7-459.578 114.898  11
   7 -11  -6 132.173 66.6787  11
   7 -11  -5-111.506 66.7566  11
   7 -11  -4-82.2496 67.7035  11
   7 -11  -3 4.53479 24.5677  11
   7 -11  -2 73.5484 10.8270   7
   7 -11  -2 229.169 88.2755  11
   7 -11  -1 47.0711 40.7636   7
   7 -11  -1 26.2723 37.4022  11
   7 -11   0 524.485 88.3674   7
   7 -11   0 521.075 123.486  11
   7 -11   1 196.496 65.1030  11
   7 -11   2 963.634 172.675  11
   7 -11   3 266.752 62.9329   6
   7 -11   3 394.312 103.976  11
   7 -11   4 211.335 58.5016   6
   7 -11   4 303.960 88.0604  11
   7 -11   5 134.901 51.4608   6
   7 -11   5 177.888 64.0019  11
   7 -11   6 835.272 136.504  11
   7 -11   7 19.0488 15.9413  11
   7 -11   8 56.8997 25.7137  11
   7 -10  -9 1516.52 124.005  12
   7 -10  -7 271.402 80.8930  11
   7 -10  -6 229.223 85.1502  11
   7 -10  -5 85.5824 52.7052   7
   7 -10  -5 92.3672 53.4793  11
   7 -10  -4 1.90423 48.8037   7
   7 -10  -4-29.7387 53.1050  11
   7 -10  -3-17.4860 19.5801   7
   7 -10  -3-23.8220 15.2309  11
   7 -10  -2 649.745 151.867   7
   7 -10  -2 603.778 144.476  11
   7 -10  -1 434.523 120.335   7
   7 -10  -1 251.036 97.8998  11
   7 -10   0 97.4179 62.3460   7
   7 -10   0 45.5515 19.6332  11
   7 -10   1 300.449 112.765  11
   7 -10   2-8.65353 28.5916  11
   7 -10   3 3.28235 40.0769  11
   7 -10   4 317.691 107.623  11
   7 -10   5 1081.84 193.014  11
   7 -10   6 307.612 95.9967  11
   7 -10   7 31.5647 20.4506  11
   7 -10   8 32.8336 21.4637  11
   7 -10   9-13.2440 10.9686  11
   7 -10  10 22.2507 20.3218  11
   7  -9 -11 29.6219 17.2949  12
   7  -9 -10 96.6834 34.8318  12
   7  -9  -9 2361.37 196.123  12
   7  -9  -8 1026.61 135.023  12
   7  -9  -8 1154.80 148.333  11
   7  -9  -7-70.7211 64.9752   7
   7  -9  -7 40.1216 25.9667  11
   7  -9  -6 600.051 151.902   7
   7  -9  -6 513.724 125.944  11
   7  -9  -5 435.744 131.097   7
   7  -9  -5 323.827 85.5372  11
   7  -9  -4 18.8818 39.0667   7
   7  -9  -4 0.15502 17.5668  11
   7  -9  -3-5.87119 5.71368   7
   7  -9  -3-10.2944 41.5774  11
   7  -9  -2-9.17893 32.3334   7
   7  -9  -2 33.7666 47.2472  11
   7  -9  -1-0.69690 24.4744   7
   7  -9  -1-40.9873 47.3561  11
   7  -9   0 329.282 99.0393   7
   7  -9   0 253.395 103.152  11
   7  -9   1 193.588 77.7669   7
   7  -9   1 266.235 109.175  11
   7  -9   2-2.64010 19.7057  11
   7  -9   3 9.60620 31.8167  11
   7  -9   4 138.358 78.2727  11
   7  -9   5 152.480 77.0710  11
   7  -9   6 1385.31 224.116  11
   7  -9   7 226.881 79.3141  11
   7  -9   8 3277.96 320.170  11
   7  -9   9 1776.98 213.606  11
   7  -9  10 237.230 67.4557  11
   7  -9  11-7.96724 7.64477  11
   7  -8 -12 31.2849 24.9251  12
   7  -8 -11 27.4269 28.3216  12
   7  -8 -10 36.8939 31.4282  12
   7  -8  -9 36.0458 34.0780  12
   7  -8  -8 806.907 163.459   7
   7  -8  -8 810.724 131.249  12
   7  -8  -8 692.220 134.839  11
   7  -8  -7 69.6340 71.5667   7
   7  -8  -7 35.0597 12.2619  12
   7  -8  -7 83.9056 50.6573  11
   7  -8  -6 42.6013 67.8919   7
   7  -8  -6-43.2110 50.1239  11
   7  -8  -5 243.371 105.269   7
   7  -8  -5 228.725 68.1849  11
   7  -8  -4 553.056 154.194   7
   7  -8  -4 552.853 122.141  11
   7  -8  -3 224.750 97.5804   7
   7  -8  -3 252.788 78.6544  11
   7  -8  -2-26.0070 23.6952   7
   7  -8  -2-0.34287 39.0811  11
   7  -8  -1 364.820 110.535   7
   7  -8  -1 354.230 100.248  11
   7  -8   0 963.530 176.491   7
   7  -8   0 1024.55 185.159  11
   7  -8   1 7942.80 499.395   7
   7  -8   1 7977.96 540.542  11
   7  -8   2 4355.76 352.887   7
   7  -8   2 4262.15 398.870  11
   7  -8   3 21.0972 29.9634  11
   7  -8   4 2357.17 302.767  11
   7  -8   5 100.806 66.5078  11
   7  -8   6 556.208 145.523  11
   7  -8   7 43.0578 48.7392  11
   7  -8   8 403.147 108.223  11
   7  -8   9 162.963 68.2354  11
   7  -8  10 210.854 69.0233  11
   7  -8  11 32.6734 12.1833  11
   7  -8  12 21.4617 12.5059  11
   7  -7 -12 19.8594 15.0414  12
   7  -7 -11 17.7798 21.9601  12
   7  -7 -10 0.79083 19.5012  12
   7  -7  -9 448.829 107.803  12
   7  -7  -8 105.871 69.5386   7
   7  -7  -8 86.5113 47.6620  12
   7  -7  -8 245.332 113.215  11
   7  -7  -7-4.58268 29.1870   7
   7  -7  -7 47.2054 23.2458  12
   7  -7  -6-10.3039 11.0608   7
   7  -7  -6 15.4820 37.1404  12
   7  -7  -6-51.0186 73.2543  11
   7  -7  -5 387.783 115.293   7
   7  -7  -5 346.671 100.328  11
   7  -7  -4 2618.98 278.709   5
   7  -7  -4 2653.90 314.251   7
   7  -7  -4 2570.42 274.841  11
   7  -7  -3 194.130 84.7919   5
   7  -7  -3 177.597 66.8271   7
   7  -7  -3 228.928 81.4583  11
   7  -7  -2 179.375 77.0135   5
   7  -7  -2 56.5220 111.663   3
   7  -7  -2 130.149 65.1993   7
   7  -7  -2 247.836 81.2370  11
   7  -7  -1 12.0001 167.354   3
   7  -7  -1 64.7018 32.4186   7
   7  -7  -1 138.152 68.6684  11
   7  -7   0 1915.70 491.249   3
   7  -7   0 1134.19 192.878   7
   7  -7   0 1582.31 227.356  11
   7  -7   1 1596.64 448.978   3
   7  -7   1 1739.52 229.951   7
   7  -7   1 1528.10 225.953  11
   7  -7   2 46.9172 42.1610  11
   7  -7   2 56.9642 138.680   3
   7  -7   2 87.8209 16.1203   7
   7  -7   3 5.93673 31.4624  11
   7  -7   3-36.4397 131.069   3
   7  -7   3-57.1651 61.4313   7
   7  -7   4 1727.41 247.970  11
   7  -7   5 248.339 106.201  11
   7  -7   5 179.664 75.0151   8
   7  -7   6 416.223 121.749  11
   7  -7   6 388.825 105.958   8
   7  -7   7 606.204 132.604   8
   7  -7   7 889.192 186.202  11
   7  -7   8 116.193 75.4088  11
   7  -7   9 47.2071 33.7445  11
   7  -7  10 270.034 95.3652  11
   7  -7  11 96.1229 47.2024  11
   7  -7  12 50.0481 32.9776  11
   7  -6 -13-34.3348 22.6603  12
   7  -6 -12 4.24473 5.18244  12
   7  -6 -11-1.71050 13.7572  12
   7  -6 -10 183.826 69.1259  12
   7  -6  -9 720.404 144.809   7
   7  -6  -9 630.624 132.531  12
   7  -6  -8 11.6165 44.8008   7
   7  -6  -8-3.37147 32.9270  12
   7  -6  -7 317.985 92.7702   5
   7  -6  -7 298.281 98.7859   7
   7  -6  -7 435.817 102.663  12
   7  -6  -7 356.196 72.7704  11
   7  -6  -6 1941.60 238.667   5
   7  -6  -6 2068.06 272.349   7
   7  -6  -6 1999.30 215.117  12
   7  -6  -6 1965.58 211.558  11
   7  -6  -5 655.898 128.351   5
   7  -6  -5 621.959 147.976   7
   7  -6  -5 624.553 113.770  11
   7  -6  -4 3002.68 591.118   3
   7  -6  -4 3355.47 305.353   5
   7  -6  -4 3463.66 347.113   7
   7  -6  -4 2982.43 283.140  11
   7  -6  -3 1260.00 185.676   5
   7  -6  -3 1536.72 437.814   3
   7  -6  -3 1634.52 237.446   7
   7  -6  -3 1308.16 187.148  11
   7  -6  -2 440.562 106.410   5
   7  -6  -2 452.142 182.637   3
   7  -6  -2 460.168 120.010   7
   7  -6  -2 769.102 145.925  11
   7  -6  -1-6.09558 41.7141   7
   7  -6  -1 2.63137 25.9860   5
   7  -6  -1-6.59235 93.9295   3
   7  -6  -1-9.61477 28.1597  11
   7  -6   0 2378.28 547.337   3
   7  -6   0 1369.51 185.442   5
   7  -6   0 1412.39 204.721   7
   7  -6   0 2007.88 247.262  11
   7  -6   1 2156.98 222.236   5
   7  -6   1 2687.40 587.374   3
   7  -6   1 1366.20 199.147   7
   7  -6   1 1865.83 244.612  11
   7  -6   2-2.45881 25.9832  11
   7  -6   2 112.293 68.4614   3
   7  -6   2-32.2643 34.9250   8
   7  -6   2 74.7117 57.0729   7
   7  -6   3 806.341 259.457   3
   7  -6   3 677.810 136.920   8
   7  -6   3 776.774 143.853   7
   7  -6   3 844.633 170.257  11
   7  -6   4 1391.80 391.467   3
   7  -6   4 1153.41 179.185   8
   7  -6   4 1450.88 186.440   7
   7  -6   4 1402.96 224.209  11
   7  -6   5 1482.07 209.405   8
   7  -6   5 1865.57 263.093  11
   7  -6   6 20.9602 26.6415   8
   7  -6   7 46.4032 31.5942   8
   7  -6   8-8.04661 24.7713   8
   7  -6   9 497.190 123.764   8
   7  -6  10 179.266 70.3213   8
   7  -6  12 27.5496 7.10238  11
   7  -6  13-30.6502 25.4059  11
   7  -5 -13-21.9763 26.6512  12
   7  -5 -12 31.7295 26.7163  12
   7  -5 -11-30.9577 25.3481  12
   7  -5 -10 182.110 68.1167  12
   7  -5  -9-21.2306 22.8424   5
   7  -5  -9 27.5309 27.7252   7
   7  -5  -9 9.58993 9.79848  12
   7  -5  -8 48.1091 31.6200   5
   7  -5  -8 54.9651 42.9667   7
   7  -5  -8 71.8743 46.5207  12
   7  -5  -7 264.673 87.1767   5
   7  -5  -7 164.545 67.2455   7
   7  -5  -7 277.004 90.4218  12
   7  -5  -6 109.621 66.4721   5
   7  -5  -6 225.186 79.7627   7
   7  -5  -6 198.490 65.6425  12
   7  -5  -5 1297.43 190.045   5
   7  -5  -5 1453.68 388.583   3
   7  -5  -5 1150.36 192.972   7
   7  -5  -5 1284.81 161.846  12
   7  -5  -4 28.8603 46.8525   5
   7  -5  -4 115.139 44.7786   3
   7  -5  -4 40.5696 41.2091   7
   7  -5  -4 31.8499 29.7850  11
   7  -5  -3 145.537 61.8231   5
   7  -5  -3 154.551 60.2191   7
   7  -5  -3 123.050 25.8040  11
   7  -5  -2 108.345 44.3112   5
   7  -5  -2 60.1201 55.6616   7
   7  -5  -2 142.488 40.2002  11
   7  -5  -1 16.4969 20.1907   5
   7  -5  -1 0.57770 70.9654   3
   7  -5  -1-13.7425 38.5545   7
   7  -5  -1-5.89943 21.2748  11
   7  -5   0 248.929 73.0914  11
   7  -5   0 165.004 55.0090   5
   7  -5   0 272.248 157.318   3
   7  -5   0 189.692 72.3873   7
   7  -5   1 2198.79 212.965   5
   7  -5   1 2479.84 541.553   3
   7  -5   1 1473.88 204.292   7
   7  -5   1 2102.08 237.589  11
   7  -5   2 1699.29 438.898   3
   7  -5   2 1391.11 180.933   8
   7  -5   2 1133.40 177.337   7
   7  -5   2 1727.51 223.344  11
   7  -5   3 61.6041 41.2091  11
   7  -5   3 136.430 56.4374   3
   7  -5   3 178.426 66.3762   8
   7  -5   3 159.098 79.1547   7
   7  -5   4 1442.65 408.327   3
   7  -5   4 1099.98 167.525   8
   7  -5   4 1174.89 175.769   7
   7  -5   4 1265.00 199.665  11
   7  -5   5 519.966 231.198   3
   7  -5   5 689.606 138.790   8
   7  -5   6 3309.67 316.130   8
   7  -5   7 49.3028 22.7022   8
   7  -5   8 5088.07 397.149   8
   7  -5   9-4.44048 17.4577   8
   7  -5  10 109.381 43.3713   8
   7  -5  11 47.3950 31.0355   8
   7  -5  12 253.285 66.2005   8
   7  -5  13 105.169 43.9647  11
   7  -4 -14-10.5742 12.9202  12
   7  -4 -13 29.7625 18.6113  12
   7  -4 -12 97.8900 49.1163  12
   7  -4 -11 1835.04 224.462  12
   7  -4 -10 618.468 130.098  12
   7  -4  -9 48.3141 33.9962   5
   7  -4  -9-11.3121 8.90725  12
   7  -4  -8 66.4137 55.6945   5
   7  -4  -8 136.115 70.3611   7
   7  -4  -8 104.768 57.9220  12
   7  -4  -7 19.7154 17.8851   5
   7  -4  -7 5.21389 33.6027   7
   7  -4  -7 34.2383 36.5879  12
   7  -4  -6 522.149 116.314   5
   7  -4  -6 569.344 118.648  12
   7  -4  -6 475.196 112.580   7
   7  -4  -5-75.7024 44.5783   5
   7  -4  -5-11.7043 42.3071   7
   7  -4  -5 21.5028 19.2368  12
   7  -4  -4-10.7437 35.2120   5
   7  -4  -4 3.41994 145.405   3
   7  -4  -4-4.62178 13.4734   7
   7  -4  -3 89.3694 47.2609   5
   7  -4  -3 86.1929 36.9260   3
   7  -4  -3 40.3777 37.5779   7
   7  -4  -2 580.744 109.550   5
   7  -4  -2 808.453 293.973   3
   7  -4  -2 645.003 135.474   7
   7  -4  -1 104.665 36.3574   5
   7  -4  -1 204.537 66.6647   7
   7  -4   0 759.255 265.779   3
   7  -4   0 533.118 120.059   7
   7  -4   1 2628.91 510.995   3
   7  -4   1 1592.95 212.534   7
   7  -4   2 665.215 259.637   3
   7  -4   2 355.852 97.9128   7
   7  -4   3 244.065 67.0968  11
   7  -4   3 194.297 146.436   3
   7  -4   3 211.734 62.4686   8
   7  -4   3 165.755 84.8636   7
   7  -4   4 1372.39 371.213   3
   7  -4   4 1448.07 185.263   8
   7  -4   4 1524.49 206.398   7
   7  -4   5 5602.94 737.586   3
   7  -4   5 5626.08 388.781   8
   7  -4   5 5490.01 386.392   7
   7  -4   6 17505.0 1307.81   3
   7  -4   6 16945.7 701.162   8
   7  -4   7-5.79455 31.0690   8
   7  -4   8-7.54879 18.2204   8
   7  -4   9 950.187 168.288   8
   7  -4  10 358.739 101.854   8
   7  -4  11 39.5304 40.8114   8
   7  -4  12 160.435 61.4678   8
   7  -4  13 47.4621 28.9569   8
   7  -4  14-9.36227 10.9081  11
   7  -3 -14-2.08648 16.5425  12
   7  -3 -13 7.96188 10.4502  12
   7  -3 -12 332.741 93.5691  12
   7  -3 -11 655.489 135.936  12
   7  -3 -10 411.153 107.985  12
   7  -3  -9 45.0699 30.8809   5
   7  -3  -9 50.5892 28.3869  12
   7  -3  -8 107.993 45.1544   5
   7  -3  -8 111.863 62.3223  12
   7  -3  -7 609.924 122.464   5
   7  -3  -7 629.900 134.800   7
   7  -3  -7 545.282 122.417  12
   7  -3  -6 102.711 51.8598   5
   7  -3  -6 36.6477 38.3260   7
   7  -3  -6 35.5376 18.5272  12
   7  -3  -5-3.83002 10.5241   5
   7  -3  -5-23.1979 27.9837   7
   7  -3  -5-22.0502 42.3976  12
   7  -3  -4 258.571 73.9796   5
   7  -3  -4 466.688 197.622   3
   7  -3  -4 551.765 125.604   7
   7  -3  -3 2.83642 20.0836   5
   7  -3  -3 102.524 140.270   3
   7  -3  -3 66.8078 38.5735   7
   7  -3  -2 797.203 128.182   5
   7  -3  -2 894.338 155.125   7
   7  -3  -1 25314.6 1543.30   3
   7  -3   0 197.900 155.496   3
   7  -3   1 2819.77 555.393   3
   7  -3   2 160.023 115.793   3
   7  -3   2 139.127 59.3821   7
   7  -3   3 594.414 111.298   8
   7  -3   3 799.578 272.426   3
   7  -3   4-116.443 110.011   3
   7  -3   4 31.3619 23.2028   8
   7  -3   5 5054.30 693.476   3
   7  -3   5 6000.04 393.793   8
   7  -3   6 9083.13 900.335   3
   7  -3   6 11013.8 556.884   8
   7  -3   7 4485.61 366.282   8
   7  -3   8 615.511 137.682   8
   7  -3   9 420.716 115.003   8
   7  -3  10 158.986 63.7398   8
   7  -3  11 456.651 106.535   8
   7  -3  12 784.679 130.573   8
   7  -3  13 85.6168 38.2068   8
   7  -2 -14 821.483 111.144  12
   7  -2 -13 94.1791 42.6497  12
   7  -2 -12 107.033 44.3652  12
   7  -2 -11 389.979 106.928  12
   7  -2 -10-22.9036 48.7795   5
   7  -2 -10-0.15293 8.56217  12
   7  -2  -9 818.426 138.746   5
   7  -2  -9 860.495 160.628  12
   7  -2  -8 5774.24 376.135   5
   7  -2  -8 5373.89 405.684  12
   7  -2  -7 2126.54 227.956   5
   7  -2  -7 2102.50 243.882  12
   7  -2  -6 1864.12 210.122   5
   7  -2  -6 1770.88 214.837   7
   7  -2  -6 1635.37 203.648  12
   7  -2  -5 36.5653 13.3248   5
   7  -2  -5 67.6383 51.9017  12
   7  -2  -5-9.46712 25.0993   7
   7  -2  -4 356.899 86.2572   5
   7  -2  -4 499.783 206.482   3
   7  -2  -4 441.357 92.5765  12
   7  -2  -4 513.290 111.485   7
   7  -2  -3 979.061 138.104   5
   7  -2  -3 1482.76 347.149   3
   7  -2  -3 1479.61 194.192   7
   7  -2  -2 3562.94 546.341   3
   7  -2  -1 2161.72 436.167   3
   7  -2   0 7942.72 842.538   3
   7  -2   1 2900.53 513.122   3
   7  -2   2-8.53133 80.5060   3
   7  -2   3 189.625 67.9954  10
   7  -2   3 53.3551 139.554   3
   7  -2   4 83.2571 35.2526  10
   7  -2   4 156.676 157.259   3
   7  -2   4 97.2640 50.5745   8
   7  -2   5 241.088 62.9887  10
   7  -2   5 233.848 82.9111   3
   7  -2   5 344.394 89.8480   8
   7  -2   6 1043.95 174.006   8
   7  -2   6 797.242 267.039   3
   7  -2   7 17465.8 735.254   8
   7  -2   8 2988.93 306.748   8
   7  -2   9 1225.37 192.218   8
   7  -2  10 154.948 63.4660   8
   7  -2  11 10.6515 30.8612   8
   7  -2  12 103.697 46.4846   8
   7  -2  13 48.4409 23.9886   8
   7  -2  14 142.444 35.4359   8
   7  -1 -14 367.554 74.7794  12
   7  -1 -13-18.2338 8.53142  12
   7  -1 -12-13.8730 34.7731  12
   7  -1 -11-7.28253 9.39319  12
   7  -1 -10-12.7544 21.6947   5
   7  -1 -10 10.2825 33.2295  12
   7  -1  -9 357.185 94.3529   5
   7  -1  -9 341.654 106.508  12
   7  -1  -8 598.434 115.453   5
   7  -1  -8 370.952 111.606  12
   7  -1  -7 131.547 55.1194   5
   7  -1  -7 210.696 80.5535  12
   7  -1  -6 778.650 133.375   5
   7  -1  -6 837.426 146.390  12
   7  -1  -5 152.314 48.2875   5
   7  -1  -5 350.915 94.5580  12
   7  -1  -4 49.2912 31.3463   5
   7  -1  -4 31.4166 21.0331  12
   7  -1  -4-12.0323 62.2774   7
   7  -1  -3 4.28885 24.4973   5
   7  -1  -3 56.7769 69.4129   3
   7  -1  -2 654.984 206.571   3
   7  -1  -1 314.608 135.817   3
   7  -1   0 798.795 264.284   3
   7  -1   1 5844.25 739.199   3
   7  -1   2 671.008 256.475   3
   7  -1   3 1223.16 156.203  10
   7  -1   3 1351.57 353.229   3
   7  -1   4 140.838 49.5776  10
   7  -1   4 211.622 107.000   3
   7  -1   4 276.747 84.2030   8
   7  -1   5 263.857 68.5434  10
   7  -1   5 411.356 198.664   3
   7  -1   5 463.443 106.915   8
   7  -1   6 4452.94 339.034  10
   7  -1   6 4130.99 631.055   3
   7  -1   6 4890.04 376.480   8
   7  -1   7 3242.04 290.727  10
   7  -1   7 3328.17 318.644   8
   7  -1   8 2610.58 288.777   8
   7  -1   9 221.137 84.1758   8
   7  -1  10 1467.27 205.781   8
   7  -1  11 550.012 118.262   8
   7  -1  12 100.683 43.8729   8
   7  -1  13 48.3432 23.3041   8
   7  -1  14 105.770 30.1348   8
   7   0 -14 154.686 43.2427  12
   7   0 -13 425.794 92.7984  12
   7   0 -12 223.103 74.3974  12
   7   0 -11 117.456 63.8895  12
   7   0 -10 121.660 61.2293   5
   7   0 -10 62.4295 11.3869   9
   7   0 -10 36.5255 53.1277  12
   7   0  -9 34.8424 30.2162   5
   7   0  -9 55.6344 53.6163   9
   7   0  -9-34.1305 46.1533  12
   7   0  -8 159.501 65.1505   5
   7   0  -8 124.324 49.8842   9
   7   0  -8 176.974 82.9902  12
   7   0  -7 163.934 59.8780   5
   7   0  -7 83.9226 61.0097  12
   7   0  -6 1390.23 179.878   5
   7   0  -6 1210.14 185.228  12
   7   0  -5 2221.82 219.566   5
   7   0  -5 2034.94 227.889  12
   7   0  -4 135.001 52.8222   5
   7   0  -4 122.046 89.4371   3
   7   0  -4 198.373 75.9377  12
   7   0  -3 1178.55 150.356   5
   7   0  -3 1830.78 387.991   3
   7   0  -3 1771.97 204.059   7
   7   0  -3 1689.80 190.434  12
   7   0  -2 70.9007 36.1203   5
   7   0  -2 209.044 130.160   3
   7   0  -1 1804.22 393.421   3
   7   0   0 513.692 208.655   3
   7   0   1 2544.94 452.702   3
   7   0   2 5384.09 331.939  10
   7   0   2 4927.82 646.482   3
   7   0   3 1023.58 149.844  10
   7   0   3 1448.11 344.741   3
   7   0   4 52.7737 23.4665  10
   7   0   4 96.8055 145.612   3
   7   0   4-5.12172 38.3632   8
   7   0   5 6013.99 389.253  10
   7   0   5 5221.47 688.505   3
   7   0   5 6007.57 390.438   8
   7   0   6 4088.91 326.221  10
   7   0   6 3209.48 547.886   3
   7   0   6 4150.06 337.570   8
   7   0   7 6220.99 408.116  10
   7   0   7 6120.35 426.254   8
   7   0   8 2726.67 273.021  10
   7   0   8 2863.22 296.973   8
   7   0   9 468.063 116.929   8
   7   0  10 100.472 48.5307   8
   7   0  11-10.0299 27.0106   8
   7   0  12 1.70092 16.1755   8
   7   0  13 244.944 59.4087   8
   7   1 -13 25.9901 14.5380   9
   7   1 -13 149.016 52.2173  12
   7   1 -12 46.3590 29.3146   9
   7   1 -12 19.2063 41.5923  12
   7   1 -11 56.5825 36.9778   9
   7   1 -11 72.6913 54.9415  12
   7   1 -10 81.3475 44.5449   5
   7   1 -10 54.8036 36.6298   9
   7   1 -10 48.7308 43.6585  12
   7   1  -9 83.7016 30.5246   5
   7   1  -9 119.667 56.6217   9
   7   1  -9 84.8053 47.9845  12
   7   1  -8 146.543 59.9507   5
   7   1  -8 123.945 61.1411   9
   7   1  -8 80.0656 50.5052  12
   7   1  -7 107.435 39.9466   9
   7   1  -7 143.821 51.0113   5
   7   1  -7 125.357 66.5569  12
   7   1  -6 732.022 131.841   5
   7   1  -6 807.614 160.493   9
   7   1  -6 651.675 141.024  12
   7   1  -5-16.3060 45.9738   9
   7   1  -5-38.3249 41.1142   5
   7   1  -5 21.2153 26.1303  12
   7   1  -4 57.1890 28.7131   9
   7   1  -4-1.13613 14.5684   5
   7   1  -4-12.3547 42.2968  12
   7   1  -3 19.2874 29.3035   9
   7   1  -3 12.8106 18.2248   5
   7   1  -3 3.12097 49.2433   3
   7   1  -3-6.50345 21.6389  12
   7   1  -2 574.899 113.653   9
   7   1  -2 405.793 87.6773   5
   7   1  -2 449.341 181.515   3
   7   1  -2 485.421 97.8711  12
   7   1  -1-1.10945 18.2374   5
   7   1  -1 107.986 129.370   3
   7   1   0 4065.99 266.753   5
   7   1   0 3650.74 542.502   3
   7   1   1 374.454 93.0892  10
   7   1   1 488.174 211.791   3
   7   1   2 327.776 90.1381  10
   7   1   2 160.791 129.308   3
   7   1   3 2631.49 463.831   3
   7   1   3 3181.59 252.935   8
   7   1   4 3664.73 301.714  10
   7   1   4 3182.88 510.467   3
   7   1   4 3453.82 281.201   8
   7   1   5 261.664 88.1173  10
   7   1   5 230.128 133.647   3
   7   1   5 287.160 84.2612   8
   7   1   6 515.804 113.414  10
   7   1   6 343.231 133.804   3
   7   1   6 527.160 117.797   8
   7   1   7 5057.20 370.305  10
   7   1   7 5117.85 390.269   8
   7   1   8 120.567 55.6192  10
   7   1   8 156.216 72.6574   8
   7   1   9 1227.02 190.934   8
   7   1  10 228.878 80.0073   8
   7   1  11 3.78613 17.6817   8
   7   1  12 93.7219 53.5122   8
   7   1  13 9.84159 18.4920   8
   7   2 -13 321.377 63.9950   9
   7   2 -12 90.3291 37.7245   9
   7   2 -12 67.8679 36.1588  12
   7   2 -11 74.4097 38.4255   9
   7   2 -11 53.8162 37.1322  12
   7   2 -10-6.61125 23.3900   5
   7   2 -10 12.2669 17.5744   9
   7   2 -10-7.50829 36.2332  12
   7   2  -9 655.808 111.487   5
   7   2  -9 691.814 144.655   9
   7   2  -9 650.145 152.989  12
   7   2  -8 727.940 124.452   5
   7   2  -8 786.955 156.955   9
   7   2  -8 754.185 166.282  12
   7   2  -7 504.186 126.618   9
   7   2  -7 475.384 102.473   5
   7   2  -7 467.221 135.053  12
   7   2  -6 732.189 133.511   5
   7   2  -6 572.998 133.260   9
   7   2  -6 716.682 156.690  12
   7   2  -5 117.296 55.9266   9
   7   2  -5 59.7609 38.6668   5
   7   2  -5 29.6576 36.8219  12
   7   2  -4 3339.04 277.200   5
   7   2  -4 2687.85 287.499   9
   7   2  -4 2525.31 282.332  12
   7   2  -3 10273.5 561.589  12
   7   2  -3 11072.4 928.561   3
   7   2  -3 11589.6 585.855   9
   7   2  -2 721.243 122.750   5
   7   2  -2 987.708 168.143   9
   7   2  -2 936.099 268.369   3
   7   2  -1 2200.96 208.334   5
   7   2  -1 2610.00 455.482   3
   7   2   0 358.775 96.0987  10
   7   2   0 479.606 93.4935   5
   7   2   0 284.222 131.106   3
   7   2   1 422.979 97.3199  10
   7   2   1 301.321 63.1175   5
   7   2   1 376.122 163.207   3
   7   2   2 64.2887 35.4698  10
   7   2   2 80.6631 74.8828   3
   7   2   3 6370.43 395.687  10
   7   2   3 5715.74 723.648   3
   7   2   3 6375.46 357.522   8
   7   2   4 45.0859 55.0935  10
   7   2   4 102.022 109.755   3
   7   2   4 6.69390 26.7189   8
   7   2   5 2375.47 256.615  10
   7   2   5 1739.88 384.775   3
   7   2   5 2164.27 229.237   8
   7   2   6 3140.38 294.556  10
   7   2   6 3126.38 290.017   8
   7   2   7 132.990 54.9337  10
   7   2   7 146.443 41.9050   8
   7   2   8 3156.71 289.341  10
   7   2   8 3250.68 307.632   8
   7   2   9 408.409 105.178  10
   7   2   9 357.570 100.240   8
   7   2  10 17.0682 21.8063   8
   7   2  11 194.397 65.8063   8
   7   2  12 35.9149 20.6378   8
   7   2  13 41.5632 15.9498   8
   7   3 -12 32.8260 28.1021   9
   7   3 -11 454.980 107.832   9
   7   3 -10 2358.19 192.672   5
   7   3 -10 2509.01 264.364   9
   7   3 -10 2536.47 286.974  12
   7   3  -9 1153.14 150.932   5
   7   3  -9 1280.91 200.275   9
   7   3  -9 1132.92 198.424  12
   7   3  -8 11.7644 41.9266   9
   7   3  -8-4.03027 21.9066   5
   7   3  -8 3.15039 26.8443  12
   7   3  -7 65.5122 58.2128   9
   7   3  -7 54.1722 25.9740   5
   7   3  -7 93.3383 55.8921  12
   7   3  -6 1871.87 213.319   5
   7   3  -6 1681.81 241.019   9
   7   3  -6 1834.10 263.757  12
   7   3  -5 8898.13 469.661   5
   7   3  -5 7760.33 529.693   9
   7   3  -5 7611.75 530.971  12
   7   3  -4 9592.36 481.625   5
   7   3  -4 8762.04 552.966   9
   7   3  -3 10689.5 495.400   5
   7   3  -3 15124.0 708.462   9
   7   3  -2 342.340 106.546   9
   7   3  -2 284.287 81.4794   5
   7   3  -1 351.806 77.0912  10
   7   3  -1 285.243 71.2117   5
   7   3  -1 498.732 203.709   3
   7   3   0 1107.28 147.685  10
   7   3   0 1117.63 146.604   5
   7   3   0 772.242 246.735   3
   7   3   1 2543.49 241.432  10
   7   3   1 2922.93 226.698   5
   7   3   1 2452.01 459.692   3
   7   3   2 84.2525 36.8150  10
   7   3   2 70.9270 78.8606   3
   7   3   3 23.7268 12.6322  10
   7   3   3 33.7848 71.9342   3
   7   3   3 15.6167 49.8307   8
   7   3   4 1646.77 205.043  10
   7   3   4 1576.62 185.172   8
   7   3   5 2022.24 233.698  10
   7   3   5 1876.40 209.727   8
   7   3   6 1910.04 228.332  10
   7   3   6 1724.94 210.259   8
   7   3   7 4524.03 357.525  10
   7   3   7 4054.09 330.139   8
   7   3   8 81.2971 29.2478  10
   7   3   8 91.8005 51.0097   8
   7   3   9-3.86094 21.2393  10
   7   3   9 2.12339 14.6349   8
   7   3  10 286.782 71.9359   8
   7   3  11 324.861 85.4253   8
   7   3  12 1010.10 123.813   8
   7   3  13 1029.64 97.9185   8
   7   4 -12 56.8452 32.8389   9
   7   4 -11 42.7296 35.0570   9
   7   4 -10 2747.74 192.523   5
   7   4 -10 3057.00 286.949   9
   7   4  -9 1106.39 138.777   5
   7   4  -9 1175.57 188.425   9
   7   4  -8 165.242 69.3730   9
   7   4  -8 97.0933 35.6973   5
   7   4  -7-19.8675 41.2523   9
   7   4  -7 19.7832 33.0948   5
   7   4  -6 18.4104 11.5159   9
   7   4  -6-15.2781 34.9411   5
   7   4  -5 1186.92 169.647   5
   7   4  -5 1137.68 206.709   9
   7   4  -4 1677.24 197.726   5
   7   4  -4 1407.06 222.202   9
   7   4  -3 126.699 69.3300   9
   7   4  -3 110.077 39.2963   5
   7   4  -2 28236.7 728.257  10
   7   4  -2 28136.5 786.764   5
   7   4  -1 4861.13 314.298  10
   7   4  -1 4977.74 324.378   5
   7   4  -1 4637.89 614.497   3
   7   4   0 12207.3 527.200  10
   7   4   0 14049.3 524.832   5
   7   4   0 11428.5 1006.58   3
   7   4   1 619.312 113.599  10
   7   4   1 529.885 93.4265   5
   7   4   2 212.464 70.8174  10
   7   4   3 181.626 64.4881  10
   7   4   4 304.944 89.3593  10
   7   4   4 314.481 82.3917   8
   7   4   5 102.840 58.8232  10
   7   4   5 59.5455 35.0690   8
   7   4   6 1659.89 211.456  10
   7   4   6 1272.73 174.230   8
   7   4   7 3718.15 317.500  10
   7   4   7 3210.54 284.371   8
   7   4   8 135.564 45.0888  10
   7   4   8 135.723 59.5586   8
   7   4   9 848.412 128.466  10
   7   4   9 807.046 136.149   8
   7   4  10 75.4138 32.2359   8
   7   4  11 767.089 114.947   8
   7   4  12 46.3915 26.4571   8
   7   5 -11 568.179 99.2149   9
   7   5 -10 1.14381 13.9450   9
   7   5 -10 24.3325 15.9096   5
   7   5  -9 27.2699 5.71265   9
   7   5  -9 48.0997 28.2462   5
   7   5  -8 160.645 70.7950   9
   7   5  -8 185.674 59.4040   5
   7   5  -7 308.091 101.639   9
   7   5  -7 370.911 97.0616   5
   7   5  -6 115.242 64.8297   9
   7   5  -6 93.5305 49.0763   5
   7   5  -5 208.430 91.4668   9
   7   5  -5 297.706 86.3214   5
   7   5  -4 71.3191 50.6746   9
   7   5  -4 109.645 42.5820   5
   7   5  -3 317.638 87.5576   5
   7   5  -2 578.410 104.335  10
   7   5  -2 780.377 130.888   5
   7   5  -1 41.4036 17.5393  10
   7   5  -1 65.8706 46.5011   5
   7   5   0 1789.59 201.122  10
   7   5   0 1611.49 179.954   5
   7   5   1 975.336 149.543  10
   7   5   1 908.205 128.002   5
   7   5   2 587.119 119.712  10
   7   5   3 3.69445 16.6570  10
   7   5   4 1367.94 193.245  10
   7   5   4 1221.46 157.946   8
   7   5   5 745.142 145.067  10
   7   5   5 638.926 113.708   8
   7   5   6 455.814 111.872  10
   7   5   6 363.693 85.0367   8
   7   5   7 151.959 58.4747  10
   7   5   7 170.053 69.7223   8
   7   5   8 203.504 65.7800  10
   7   5   8 196.108 70.1192   8
   7   5   9 160.392 47.9220  10
   7   5   9 138.550 52.5299   8
   7   5  10 14.5466 20.3408   8
   7   5  11 8.22092 8.39142   8
   7   6 -10 49.6203 37.5283   9
   7   6  -9 206.644 74.0659   9
   7   6  -9 178.058 42.8062   5
   7   6  -8-2.25394 26.7934   9
   7   6  -8 19.2082 4.86079   5
   7   6  -7 1038.18 140.084   5
   7   6  -7 1076.83 177.329   9
   7   6  -6 457.059 110.468   9
   7   6  -6 493.188 100.105   5
   7   6  -5 3.60613 6.31670   5
   7   6  -4-0.54786 24.9496   5
   7   6  -3 555.646 102.215  10
   7   6  -3 454.692 98.2414   5
   7   6  -2 626.265 117.540  10
   7   6  -2 529.036 109.249   5
   7   6  -1 43.0716 25.3193  10
   7   6  -1 25.2165 16.7688   5
   7   6   0 700.713 129.322  10
   7   6   0 667.248 116.327   5
   7   6   1 29.5190 23.0347  10
   7   6   1-28.2018 11.8159   5
   7   6   2 114.541 57.9064  10
   7   6   3 208.480 74.5471  10
   7   6   4 241.645 83.5364  10
   7   6   4 191.801 52.2713   8
   7   6   5 378.728 88.6411  10
   7   6   5 293.129 76.9700   8
   7   6   6 932.786 144.443  10
   7   6   6 800.383 127.600   8
   7   6   7-3.52270 25.4334  10
   7   6   7 34.6490 26.7562   8
   7   6   8 566.055 93.2337  10
   7   6   8 609.052 103.698   8
   7   6   9 20.9985 22.2513  10
   7   6   9 0.48623 19.6142   8
   7   6  10 76.9430 33.5357   8
   7   7  -9 185.679 36.6006   5
   7   7  -8 99.8854 28.5902   5
   7   7  -7 59.4947 24.1558   5
   7   7  -6 150.345 53.9657   5
   7   7  -5 303.822 76.1087   5
   7   7  -4 4.80127 6.58759   5
   7   7  -3 817.891 117.265  10
   7   7  -3 772.864 120.924   5
   7   7  -2 314.147 75.8402  10
   7   7  -2 325.901 74.2688   5
   7   7  -1 95.3871 46.4930  10
   7   7  -1 42.3911 22.2371   5
   7   7   0 173.934 59.1148  10
   7   7   0 139.902 52.4891   5
   7   7   1 35.0040 10.9310  10
   7   7   1-35.0481 23.2874   5
   7   7   2 12.6058 30.7872  10
   7   7   3 1049.52 154.368  10
   7   7   4 21.3769 35.0761  10
   7   7   4-19.2189 25.0942   8
   7   7   5 234.636 63.7992  10
   7   7   5 195.836 53.6116   8
   7   7   6 20.0624 7.26127  10
   7   7   6-13.9724 2.76360   8
   7   7   7 153.780 51.6738  10
   7   7   7 126.539 42.9712   8
   7   7   8 164.362 39.4738  10
   7   7   8 272.697 59.8737   8
   7   7   9 30.8154 20.5637   8
   7   8  -7 28.6587 25.2107   5
   7   8  -6 45.2335 24.4621   5
   7   8  -5 670.343 97.9466   5
   7   8  -4 76.2606 40.5576   5
   7   8  -3 38.7763 15.8924  10
   7   8  -3-18.4621 31.1662   5
   7   8  -2-9.25298 12.0985  10
   7   8  -2-10.1391 15.8921   5
   7   8  -1 186.159 56.6420  10
   7   8  -1 137.785 50.2259   5
   7   8   0 854.922 128.341  10
   7   8   0 843.575 109.900   5
   7   8   1 1210.94 156.158  10
   7   8   1 1034.39 117.341   5
   7   8   2 213.844 63.4285  10
   7   8   3 128.417 53.8938  10
   7   8   4 361.363 76.9980  10
   7   8   5 373.992 76.5910  10
   7   8   5 306.627 55.2076   8
   7   8   6 29.6752 18.8753  10
   7   8   6 46.5133 20.5369   8
   7   8   7 231.123 47.9316  10
   7   8   7 200.689 42.5589   8
   7   9  -6-6.29463 3.11300   5
   7   9  -5 5.03554 0.71120   5
   7   9  -4 113.349 36.4142   5
   7   9  -3 549.389 71.4819  10
   7   9  -3 463.120 73.6802   5
   7   9  -2 128.815 40.6286  10
   7   9  -2 80.6724 24.8832   5
   7   9  -1 7.87361 15.1916  10
   7   9  -1 2.72580 12.3379   5
   7   9   0 168.445 46.8329  10
   7   9   0 146.089 40.6555   5
   7   9   1 173.517 48.4907  10
   7   9   1 59.9452 8.40297   5
   7   9   2 143.512 45.3372  10
   7   9   3-22.0481 27.0267  10
   7   9   4 933.188 108.778  10
   7   9   5 376.049 63.0397  10
   7  10   1 1413.16 111.147  10
   8 -13  -2 108.238 34.3601  11
   8 -13  -1 39.7634 12.1203  11
   8 -13   0-57.8588 25.2787  11
   8 -13   1-44.0396 24.4578  11
   8 -12  -5 169.035 54.3116  11
   8 -12  -4 44.5342 9.57392  11
   8 -12  -3-84.0103 37.4208  11
   8 -12  -2 56.0379 39.4130  11
   8 -12  -1 102.969 38.4222  11
   8 -12   0 52.1402 14.8582  11
   8 -12   1-16.2284 32.1768  11
   8 -12   2 29.5923 21.3029  11
   8 -12   3-15.4268 23.2719  11
   8 -12   4 15.7995 7.93578  11
   8 -12   5 1031.99 118.332  11
   8 -11  -6 78.5106 59.9812  11
   8 -11  -5 65.3336 23.4142  11
   8 -11  -4 35.0450 18.2154  11
   8 -11  -3 81.1259 45.8318   7
   8 -11  -3 46.8866 16.9581  11
   8 -11  -2 29.9734 11.9036   7
   8 -11  -2-28.5014 40.0139  11
   8 -11  -1 717.424 127.823   7
   8 -11  -1 475.537 107.922  11
   8 -11   0 11.8747 29.7015   7
   8 -11   0 41.1834 25.3393  11
   8 -11   1 37.8599 38.6246  11
   8 -11   2 31.9027 40.9859  11
   8 -11   3 134.643 51.3942  11
   8 -11   4 43.5254 26.9855  11
   8 -11   5 871.822 136.598  11
   8 -11   6 1380.45 155.682  11
   8 -11   7 415.338 76.7770  11
   8 -10  -7 910.805 96.0373  11
   8 -10  -6 6.33851 55.3093  11
   8 -10  -5 127.435 67.4720   7
   8 -10  -5 144.106 25.1716  11
   8 -10  -4 62.8822 38.3475   7
   8 -10  -4 48.7015 29.7707  11
   8 -10  -3 15.3245 48.2506   7
   8 -10  -3 50.5629 16.4522  11
   8 -10  -2 1997.03 252.777   7
   8 -10  -2 1553.46 210.670  11
   8 -10  -1 733.686 151.228   7
   8 -10  -1 580.908 136.093  11
   8 -10   0 346.694 93.4901   7
   8 -10   0 195.979 63.8856  11
   8 -10   1 59.1498 40.3763   7
   8 -10   1 9.47966 22.8726  11
   8 -10   2-11.7647 42.0723  11
   8 -10   3 46.6835 18.4017  11
   8 -10   4 85.1416 52.4587  11
   8 -10   5-18.6725 31.4542  11
   8 -10   6-15.0672 31.5283  11
   8 -10   7 226.210 75.0683  11
   8 -10   8 175.232 54.6695  11
   8 -10   9 3.86230 17.7814  11
   8  -9  -7-66.0859 56.8407   7
   8  -9  -7 62.1029 56.1706  11
   8  -9  -6 27.5544 40.4170   7
   8  -9  -6 57.2038 47.2828  11
   8  -9  -5 63.1037 56.7777   7
   8  -9  -5 109.801 53.5710  11
   8  -9  -4 49.6255 37.3253   7
   8  -9  -4-33.2975 29.7344  11
   8  -9  -3 273.591 93.8553   7
   8  -9  -3 321.630 101.373  11
   8  -9  -2 1.21054 39.8825   7
   8  -9  -2 4.60697 19.1309  11
   8  -9  -1 281.636 101.508   7
   8  -9  -1 168.777 75.3487  11
   8  -9   0 17.2371 34.5518   7
   8  -9   0 21.9823 29.3557  11
   8  -9   1 145.455 59.9934   7
   8  -9   1 174.832 71.1119  11
   8  -9   2 69.8277 32.6624   7
   8  -9   2 141.322 71.9277  11
   8  -9   3 111.524 43.9634  11
   8  -9   4 191.333 83.9608  11
   8  -9   5 211.281 81.1245  11
   8  -9   6 90.2051 30.5095  11
   8  -9   7-3.73385 14.9850  11
   8  -9   8-17.6508 29.6222  11
   8  -9   9 496.194 99.1798  11
   8  -9  10 1.28144 17.1956  11
   8  -8 -10-10.2677 12.2047  12
   8  -8  -9-4.47966 12.1316  12
   8  -8  -8 32.8679 34.6577   7
   8  -8  -8 72.2918 35.5174  12
   8  -8  -7 584.091 145.109   7
   8  -8  -7 592.691 120.648  11
   8  -8  -6-3.44502 36.0234   7
   8  -8  -6 52.8834 40.4864  11
   8  -8  -5 747.634 168.882   7
   8  -8  -5 541.092 120.555  11
   8  -8  -4 58.8270 79.1775   7
   8  -8  -4-32.9258 34.3734  11
   8  -8  -3 31.2288 20.0517   7
   8  -8  -3 69.8278 57.7251  11
   8  -8  -2 16.9097 50.6753   7
   8  -8  -2 49.1091 43.4672  11
   8  -8  -1 447.493 121.156   7
   8  -8  -1 548.521 132.210  11
   8  -8   0 493.264 137.231   7
   8  -8   0 411.691 123.188  11
   8  -8   1 434.075 115.461   7
   8  -8   1 379.510 114.047  11
   8  -8   2 367.247 111.142  11
   8  -8   2 473.990 122.992   7
   8  -8   3 709.363 135.200   7
   8  -8   3 826.123 173.321  11
   8  -8   4 13.3883 32.8389  11
   8  -8   5 1509.01 233.748  11
   8  -8   6 527.211 140.093  11
   8  -8   7 197.553 79.5322  11
   8  -8   8 299.354 90.8330  11
   8  -8   9 4.35112 25.8801  11
   8  -8  10 35.6330 33.1863  11
   8  -8  11 125.554 36.7638  11
   8  -7 -11 24.3483 24.4800  12
   8  -7 -10 22.3223 17.4989  12
   8  -7  -9 43.4642 24.3179  12
   8  -7  -8 16.4684 14.4552   7
   8  -7  -8 44.4561 24.0292  12
   8  -7  -7 300.245 102.656   7
   8  -7  -7 250.724 68.5876  12
   8  -7  -7 464.699 105.771  11
   8  -7  -6 609.101 151.354   7
   8  -7  -6 519.173 111.712  11
   8  -7  -5 78.6815 51.6191   7
   8  -7  -5 87.9224 27.6284  11
   8  -7  -4 123.191 62.3641   5
   8  -7  -4 82.1644 47.9712   7
   8  -7  -4 29.7682 39.3140  11
   8  -7  -3 74.0572 33.5976   5
   8  -7  -3 48.2612 40.0772   7
   8  -7  -3 10.5672 49.4092  11
   8  -7  -2 51.1802 32.2871   5
   8  -7  -2 112.582 68.4935   7
   8  -7  -2 58.4168 12.8714  11
   8  -7  -1 184.096 78.4388   7
   8  -7  -1 163.428 73.1600  11
   8  -7   0 0.70969 35.5051   7
   8  -7   0 63.2726 53.6166  11
   8  -7   1 2.63303 41.0210  11
   8  -7   1 54.6822 39.8191   7
   8  -7   2-41.0880 67.9014  11
   8  -7   2 4.79886 6.77818   7
   8  -7   3 14.8304 26.6817  11
   8  -7   3 98.0322 43.7430   7
   8  -7   4-0.18556 18.7470  11
   8  -7   5 203.602 89.0743  11
   8  -7   6 47.8422 54.7139  11
   8  -7   7 610.896 150.844  11
   8  -7   8 577.055 136.441  11
   8  -7   9 493.138 117.788  11
   8  -7  10 286.630 77.9989  11
   8  -7  11 113.483 44.7689  11
   8  -6 -12-22.9326 18.1089  12
   8  -6 -11-1.04836 15.8717  12
   8  -6 -10 36.6417 28.9061  12
   8  -6  -9 87.2390 34.0159   7
   8  -6  -9 22.4443 17.9388  12
   8  -6  -8 21.6523 29.6113   7
   8  -6  -8-36.8522 35.8566  12
   8  -6  -7 130.722 60.2174   5
   8  -6  -7 109.993 62.2250   7
   8  -6  -7 160.117 55.2701  12
   8  -6  -6 214.878 81.9637   7
   8  -6  -6 146.941 69.6385   5
   8  -6  -5 930.496 168.141   5
   8  -6  -5 812.643 169.477   7
   8  -6  -4 1104.73 177.536   5
   8  -6  -4 905.242 181.366   7
   8  -6  -4 1019.90 154.947  11
   8  -6  -3 882.236 160.150   5
   8  -6  -3 1038.60 195.270   7
   8  -6  -3 853.049 144.309  11
   8  -6  -2 132.452 59.2592   5
   8  -6  -2 147.098 55.2533   7
   8  -6  -2 108.625 53.3726  11
   8  -6  -1 13.4623 13.5000   5
   8  -6  -1-12.2320 38.4569   7
   8  -6  -1 23.1231 27.9234  11
   8  -6   0 369.870 101.623   5
   8  -6   0 328.331 111.549   7
   8  -6   0 337.254 97.4254  11
   8  -6   1 45.3466 5.05552  11
   8  -6   1 94.2471 46.6459   5
   8  -6   1 121.963 63.1518   7
   8  -6   2 158.259 82.0644  11
   8  -6   2 93.1219 54.9823   7
   8  -6   3 3177.29 292.234   8
   8  -6   3 3370.00 321.037   7
   8  -6   3 3708.70 352.924  11
   8  -6   4 156.270 72.4582  11
   8  -6   4 65.1866 39.3947   8
   8  -6   4 224.867 82.9441   7
   8  -6   5 1960.17 239.150   8
   8  -6   5 2279.58 289.122  11
   8  -6   6 1426.97 205.492   8
   8  -6   6 1647.58 241.196  11
   8  -6   7 143.740 50.9655  11
   8  -6   7 34.0354 17.4300   8
   8  -6   8 416.183 120.700  11
   8  -6   8 285.588 90.7584   8
   8  -6   9 91.4536 62.4389  11
   8  -6   9 23.0039 35.8735   8
   8  -6  10 74.7995 31.4631  11
   8  -6  10 59.5695 45.8539   8
   8  -6  11-32.4515 45.0335  11
   8  -6  12 40.8142 26.7709  11
   8  -5 -12-2.46845 14.5075  12
   8  -5 -11 157.817 58.6989  12
   8  -5 -10 836.427 139.396  12
   8  -5  -9 607.103 114.251   5
   8  -5  -9 643.374 123.014   7
   8  -5  -9 568.413 116.501  12
   8  -5  -8 310.931 92.0357   5
   8  -5  -8 391.989 109.859   7
   8  -5  -8 287.295 83.3341  12
   8  -5  -7 200.930 67.8470   5
   8  -5  -7 95.7512 57.0517   7
   8  -5  -7 146.368 57.8462  12
   8  -5  -6 164.933 62.7320   5
   8  -5  -6 130.929 73.5396   7
   8  -5  -6 147.964 62.6677  12
   8  -5  -5 115.321 64.1169   5
   8  -5  -5 93.2300 63.8479   7
   8  -5  -4 3111.55 306.468   5
   8  -5  -4 3524.73 356.504   7
   8  -5  -3 908.955 159.573   5
   8  -5  -3 1097.35 198.418   7
   8  -5  -2 468.691 107.107   5
   8  -5  -2 1005.78 356.342   3
   8  -5  -2 1089.93 195.274   7
   8  -5  -1 70.6155 39.7023   5
   8  -5  -1 81.9208 49.0312   7
   8  -5   0 3.79260 19.5947   5
   8  -5   0-42.9430 72.4959   3
   8  -5   0 8.96421 32.3433   7
   8  -5   0-24.0509 36.9628  11
   8  -5   1 242.683 83.6499  11
   8  -5   1 293.737 80.3303   5
   8  -5   1 113.976 195.543   3
   8  -5   1 221.954 85.3338   7
   8  -5   2 111.057 74.9080  11
   8  -5   2 88.2855 34.8672   5
   8  -5   2 118.606 53.5654   8
   8  -5   2 10.6764 39.7689   7
   8  -5   3 651.978 141.604  11
   8  -5   3 485.112 111.503   8
   8  -5   3 526.985 123.789   7
   8  -5   4-1.23778 26.9862  11
   8  -5   4 29.7040 19.9122   8
   8  -5   4 11.9482 9.03334   7
   8  -5   5 1800.37 224.710   8
   8  -5   5 1698.38 217.191   7
   8  -5   5 2082.73 260.217  11
   8  -5   6 2069.83 244.158   8
   8  -5   6 2337.31 287.074  11
   8  -5   7 496.086 132.122  11
   8  -5   7 499.324 120.346   8
   8  -5   8 279.583 92.0494   8
   8  -5   9 101.780 42.6696   8
   8  -5  10 19.4268 72.8244  11
   8  -5  10-7.03277 12.7121   8
   8  -5  11 9.73213 29.4377  11
   8  -5  11-4.92250 25.0619   8
   8  -5  12 81.5194 37.3918  11
   8  -4 -13 40.7534 24.2591  12
   8  -4 -12 225.598 65.3182  12
   8  -4 -11 916.223 143.791  12
   8  -4 -10 531.338 93.2198   5
   8  -4 -10 514.131 112.470  12
   8  -4  -9 106.693 54.0506   5
   8  -4  -9 99.8274 50.2529  12
   8  -4  -8 349.580 95.5997   5
   8  -4  -8 300.928 90.4724   7
   8  -4  -8 368.461 97.3816  12
   8  -4  -7-10.4490 15.0991   5
   8  -4  -7 6.10734 17.0697   7
   8  -4  -7 12.8972 29.8779  12
   8  -4  -6 23.2078 25.9402   5
   8  -4  -6 55.7845 31.7813   7
   8  -4  -6 21.0860 17.9514  12
   8  -4  -5 13.6811 20.9527   5
   8  -4  -5 44.3178 10.6194   7
   8  -4  -4 56.6851 30.9689   5
   8  -4  -4 132.491 165.884   3
   8  -4  -4 62.1722 52.6286   7
   8  -4  -3 1975.52 482.040   3
   8  -4  -3 1287.07 187.036   5
   8  -4  -3 1991.60 257.670   7
   8  -4  -2 6607.32 902.330   3
   8  -4  -2 6501.22 463.729   7
   8  -4  -1 512.264 116.994   5
   8  -4  -1 742.284 272.365   3
   8  -4  -1 902.625 170.731   7
   8  -4   0 1564.52 197.183   5
   8  -4   0 1839.03 473.361   3
   8  -4   0 1247.82 199.155   7
   8  -4   1 80.3809 40.8394   5
   8  -4   1 107.530 150.285   3
   8  -4   1 77.2107 58.4942   7
   8  -4   2 18.7666 13.6222   8
   8  -4   2-1.85206 42.0012   7
   8  -4   3 12.8852 15.6290  11
   8  -4   3 75.0675 48.5000   8
   8  -4   3 78.3651 35.7371   7
   8  -4   4 1124.09 167.568   8
   8  -4   4 1108.74 191.386   7
   8  -4   4 1109.11 181.390  11
   8  -4   5 150.938 68.6070  11
   8  -4   5 159.733 69.1403   8
   8  -4   5 237.864 91.9966   7
   8  -4   6 6966.24 452.044   8
   8  -4   6 7479.46 464.333   7
   8  -4   7 6754.09 447.899   8
   8  -4   8 30.1609 21.1786   8
   8  -4   9 165.717 70.3024   8
   8  -4  10 203.927 75.4997   8
   8  -4  11 753.691 122.271   8
   8  -4  12 316.884 76.4005  11
   8  -4  12 456.248 84.9223   8
   8  -3 -13 27.3115 15.1996  12
   8  -3 -12 75.3834 43.4328  12
   8  -3 -11 58.4836 35.1971  12
   8  -3 -10 34.7802 24.3850   5
   8  -3 -10 9.40292 22.5221  12
   8  -3  -9-34.9088 8.74859   5
   8  -3  -9 7.59874 34.2837  12
   8  -3  -8 63.8138 25.4713   5
   8  -3  -8 61.6770 42.4921  12
   8  -3  -7 163.752 61.6931   5
   8  -3  -7 108.310 47.5814   7
   8  -3  -7 215.934 78.7961  12
   8  -3  -6 130.946 54.2042   5
   8  -3  -6 76.9575 13.2480   7
   8  -3  -6 53.3932 51.6534  12
   8  -3  -5 685.559 140.534   5
   8  -3  -5 696.346 148.956   7
   8  -3  -5 680.735 127.741  12
   8  -3  -4 141.331 53.0942   5
   8  -3  -4 122.898 68.5146   7
   8  -3  -3-19.6425 27.0601   5
   8  -3  -3 0.60133 53.1984   3
   8  -3  -3-18.4649 45.9593   7
   8  -3  -2 12.3403 25.8672   5
   8  -3  -2 59.9605 11.1024   3
   8  -3  -2-7.57261 45.6829   7
   8  -3  -1 31.5548 30.0364   5
   8  -3  -1 16.9354 45.3335   3
   8  -3  -1 72.3105 54.6283   7
   8  -3   0 48.1278 34.3689   5
   8  -3   0-27.4602 58.6108   3
   8  -3   0 19.5456 23.2155   7
   8  -3   1 224.099 53.5684   5
   8  -3   1 379.720 227.391   3
   8  -3   1 196.574 79.1490   7
   8  -3   2 593.395 273.846   3
   8  -3   2 316.803 101.410   7
   8  -3   3 614.856 125.031   8
   8  -3   3 780.070 274.399   3
   8  -3   3 592.957 139.542   7
   8  -3   4 1640.22 202.519   8
   8  -3   4 1486.53 403.632   3
   8  -3   4 1831.91 244.975   7
   8  -3   5 2026.59 235.657   8
   8  -3   5 2079.65 259.039   7
   8  -3   6 4344.98 355.191   8
   8  -3   6 4673.74 376.591   7
   8  -3   7 1191.46 185.354   8
   8  -3   7 1194.00 182.892   7
   8  -3   8 2213.86 252.942   8
   8  -3   9 528.222 119.978   8
   8  -3  10 121.416 59.6407   8
   8  -3  11 471.853 100.499   8
   8  -3  12 24.0060 30.0077   8
   8  -3  13 40.2402 21.2303   8
   8  -2 -13 43.2329 23.4119  12
   8  -2 -12 67.3124 42.3207  12
   8  -2 -11 40.4437 19.6511  12
   8  -2 -10 54.3767 35.9413   5
   8  -2 -10 70.0745 48.0929  12
   8  -2  -9 304.435 88.1047   5
   8  -2  -9 293.040 91.4493  12
   8  -2  -8 106.445 51.1118   5
   8  -2  -8 79.7461 45.9684  12
   8  -2  -7 88.7168 59.1557   5
   8  -2  -7 11.0861 23.0416  12
   8  -2  -6 39.4300 12.8012   5
   8  -2  -6 57.7661 28.6081   7
   8  -2  -6 65.6302 35.4962  12
   8  -2  -5 18.5842 16.6076   5
   8  -2  -5-2.99358 42.8210   7
   8  -2  -5 86.6450 51.5934  12
   8  -2  -4 41.3387 36.0897   5
   8  -2  -4 28.8817 97.2532   3
   8  -2  -4-6.73487 29.6838  12
   8  -2  -4-3.67411 33.9609   7
   8  -2  -3 266.154 79.7624   5
   8  -2  -3 470.429 119.672   7
   8  -2  -2 209.957 70.9039   5
   8  -2  -2 179.182 90.6156   3
   8  -2  -2 396.246 113.811   7
   8  -2  -1 1187.23 157.609   5
   8  -2  -1 1697.80 407.843   3
   8  -2  -1 2054.48 249.428   7
   8  -2   0 335.050 82.3238   5
   8  -2   0 273.824 153.319   3
   8  -2   0 337.896 97.1123   7
   8  -2   1 905.970 137.442  10
   8  -2   1 1041.09 143.403   5
   8  -2   1 757.820 276.600   3
   8  -2   1 642.352 143.327   7
   8  -2   2 226.618 72.5183  10
   8  -2   2 160.626 132.762   3
   8  -2   3 52.0737 10.4238  10
   8  -2   3-62.3183 58.2941   8
   8  -2   4 174.440 151.867   3
   8  -2   4 28.2296 21.6463   8
   8  -2   5 598.203 122.889   8
   8  -2   6 1074.18 168.182   8
   8  -2   7 1357.88 195.563   8
   8  -2   8 828.429 153.450   8
   8  -2   9-24.0615 26.7062   8
   8  -2  10 229.860 77.4402   8
   8  -2  11 196.253 67.1713   8
   8  -2  12-2.28033 17.9833   8
   8  -2  13 5.32037 1.77153   8
   8  -1 -13 38.1647 20.2513  12
   8  -1 -12 191.332 62.6475  12
   8  -1 -11 360.801 95.4432  12
   8  -1 -10 72.3784 40.6190   5
   8  -1 -10 51.0907 41.2092  12
   8  -1  -9 91.7743 39.3739   5
   8  -1  -9 133.824 58.4672  12
   8  -1  -8-8.68968 33.7252   5
   8  -1  -8 29.8582 22.3716  12
   8  -1  -7 277.068 83.8162   5
   8  -1  -7 262.871 83.2958  12
   8  -1  -6 113.069 56.9804   5
   8  -1  -6 80.3877 49.6091  12
   8  -1  -5 318.990 91.2013   5
   8  -1  -5 299.008 84.6361   7
   8  -1  -5 312.578 90.5222  12
   8  -1  -4 57.5829 49.3874   5
   8  -1  -4 50.7431 9.41788  12
   8  -1  -4 41.1585 4.60376   7
   8  -1  -3 68.9724 38.3894   5
   8  -1  -3 165.890 84.0726   7
   8  -1  -2 250.045 65.6211   5
   8  -1  -2 239.378 138.280   3
   8  -1  -2 467.501 118.866   7
   8  -1  -1 96.1807 41.4159   5
   8  -1  -1 78.1617 82.1231   3
   8  -1  -1 71.3197 45.7332   7
   8  -1   0 2470.69 221.014   5
   8  -1   0 2346.15 492.089   3
   8  -1   1 1382.15 167.061  10
   8  -1   1 1421.62 163.157   5
   8  -1   1 1004.62 299.101   3
   8  -1   2 755.207 134.493  10
   8  -1   2 627.960 257.723   3
   8  -1   3 335.162 93.3012  10
   8  -1   3 174.647 176.384   3
   8  -1   3 362.332 89.6787   8
   8  -1   4 61.8273 37.0398  10
   8  -1   4 63.5712 89.8117   3
   8  -1   4 75.6601 10.7482   8
   8  -1   5 2509.37 254.759  10
   8  -1   5 2396.61 249.696   8
   8  -1   6 1536.34 205.445   8
   8  -1   7 37.1864 23.5391   8
   8  -1   8 124.261 51.8049   8
   8  -1   9 595.994 125.656   8
   8  -1  10 150.231 58.0970   8
   8  -1  11 286.305 72.9103   8
   8  -1  12 58.2814 33.6728   8
   8  -1  13 142.010 38.7140   8
   8   0 -13 552.521 91.6883  12
   8   0 -12 75.5387 27.8829  12
   8   0 -11 59.7706 46.3766  12
   8   0 -10 14.2582 20.4622   5
   8   0 -10 49.0936 39.4482  12
   8   0  -9 22.5879 29.0035   5
   8   0  -9 81.2880 39.8859  12
   8   0  -8 54.7679 29.1796   5
   8   0  -8 58.6341 42.1637  12
   8   0  -7 43.2801 37.4845   5
   8   0  -7 118.586 73.6396  12
   8   0  -6-6.62227 17.6301   5
   8   0  -6 0.47772 10.0537  12
   8   0  -5 330.665 89.1652   5
   8   0  -5 338.942 95.5855  12
   8   0  -4 361.279 82.5679   5
   8   0  -4 312.227 95.2048  12
   8   0  -4 332.442 88.9746   7
   8   0  -3-21.4964 36.5847   5
   8   0  -3-7.43932 118.985   3
   8   0  -3 43.4954 21.6825  12
   8   0  -3-38.1000 51.2942   7
   8   0  -2 266.744 75.7007   5
   8   0  -2 340.403 222.616   3
   8   0  -2 387.062 109.226   7
   8   0  -1 549.327 98.8620   5
   8   0  -1 821.633 271.976   3
   8   0  -1 1016.43 176.435   7
   8   0   0 96.9898 45.8443   5
   8   0   0-23.3878 150.890   3
   8   0   1 62.9265 14.1563  10
   8   0   1 126.188 43.9038   5
   8   0   1 77.2923 125.182   3
   8   0   2 131.312 57.8445  10
   8   0   2 170.545 109.157   3
   8   0   3 773.088 140.226  10
   8   0   3 736.015 238.389   3
   8   0   4 423.904 97.5563  10
   8   0   4 359.073 93.3678   8
   8   0   5 1193.09 171.857  10
   8   0   5 1097.90 173.859   8
   8   0   6 280.992 85.5682  10
   8   0   6 200.355 66.9466   8
   8   0   7 46.6962 18.0386  10
   8   0   7 30.6506 20.6405   8
   8   0   8-11.3738 17.9692   8
   8   0   9 744.074 140.090   8
   8   0  10 14.9811 14.9194   8
   8   0  11 979.083 138.299   8
   8   0  12 133.970 45.1592   8
   8   0  13 2.22066 7.87235   8
   8   1 -12 128.498 53.7316  12
   8   1 -11 124.698 61.1806  12
   8   1 -10 73.6564 25.3811   5
   8   1 -10 49.5088 23.3807   9
   8   1  -9 216.215 68.6326   5
   8   1  -9 187.506 62.8263   9
   8   1  -9 206.412 85.6798  12
   8   1  -8 195.276 71.2493   5
   8   1  -8 145.058 63.3182   9
   8   1  -8 251.467 95.0726  12
   8   1  -7 900.766 150.348   5
   8   1  -7 808.471 148.942   9
   8   1  -7 775.918 162.050  12
   8   1  -6 520.972 120.431   9
   8   1  -6 507.219 110.572   5
   8   1  -6 377.364 104.982  12
   8   1  -5 1754.77 208.465   5
   8   1  -5 1662.65 217.979   9
   8   1  -5 1433.93 215.522  12
   8   1  -4 98.4387 46.1768   9
   8   1  -4 33.4209 27.7026   5
   8   1  -4 41.0132 27.1716  12
   8   1  -3 418.881 93.9694   5
   8   1  -3 302.304 95.3440  12
   8   1  -3 337.783 91.5556   7
   8   1  -2 695.129 124.353   5
   8   1  -2 1217.46 372.716   3
   8   1  -2 1108.54 177.495   7
   8   1  -1 59.8115 19.4246   5
   8   1  -1-10.9991 63.9747   3
   8   1   0 462.453 96.9649  10
   8   1   0 532.840 97.9174   5
   8   1   0 319.445 141.670   3
   8   1   1 2015.67 213.214  10
   8   1   1 1930.46 184.701   5
   8   1   1 1819.74 423.816   3
   8   1   2 1975.49 218.526  10
   8   1   2 1560.28 384.707   3
   8   1   3 25.0432 16.3529  10
   8   1   4 5402.19 383.622  10
   8   1   4 4803.67 337.224   8
   8   1   5 10.8563 25.4206  10
   8   1   5-25.3716 36.7032   8
   8   1   6 1177.64 176.310  10
   8   1   6 1196.91 181.183   8
   8   1   7 497.597 113.085  10
   8   1   7 464.809 106.401   8
   8   1   8 375.189 93.4705  10
   8   1   8 443.178 108.395   8
   8   1   9 423.056 100.304   8
   8   1  10 2896.45 256.149   8
   8   1  11 1006.42 134.159   8
   8   1  12-7.66497 20.2105   8
   8   2 -11-9.72694 3.67880   9
   8   2 -10 20.1804 8.39814   5
   8   2 -10-26.4243 9.63922   9
   8   2 -10-45.5210 50.0885  12
   8   2  -9-20.9906 23.7376   5
   8   2  -9 4.01554 13.9342   9
   8   2  -9 11.7235 38.6920  12
   8   2  -8 15.7248 15.4341   9
   8   2  -8 58.5201 38.1237   5
   8   2  -8 71.4112 51.9977  12
   8   2  -7 303.213 103.264   9
   8   2  -7 292.958 82.5622   5
   8   2  -7 279.500 96.1402  12
   8   2  -6 486.280 124.528   9
   8   2  -6 494.654 106.413   5
   8   2  -6 468.620 130.940  12
   8   2  -5 17.9868 20.1636   9
   8   2  -5-12.7314 31.4959   5
   8   2  -5-29.1129 60.5704  12
   8   2  -4 105.371 56.4079   9
   8   2  -4 72.6892 40.1006   5
   8   2  -3 11969.3 543.489   5
   8   2  -2 11269.9 508.963   5
   8   2  -2 10666.6 539.471   7
   8   2  -1 4383.49 306.720   5
   8   2   0 61.8097 21.5492  10
   8   2   0 69.8294 32.8252   5
   8   2   1 1901.75 216.433  10
   8   2   1 2030.04 196.692   5
   8   2   2 605.341 124.962  10
   8   2   3 2338.37 245.223  10
   8   2   4 2662.56 269.858  10
   8   2   4 2631.97 244.931   8
   8   2   5 1659.77 215.066  10
   8   2   5 1672.62 198.083   8
   8   2   6 121.794 67.4706  10
   8   2   6 42.1792 10.9518   8
   8   2   7 365.222 95.7634  10
   8   2   7 308.719 84.2866   8
   8   2   8 72.4966 52.6500  10
   8   2   8 39.0609 48.5911   8
   8   2   9 10.3397 20.8719   8
   8   2  10 425.767 92.7521   8
   8   2  11 164.905 49.7934   8
   8   2  12 1273.45 119.764   8
   8   3 -11 611.449 93.2714   9
   8   3 -10 39.2802 21.5645   5
   8   3 -10 89.3821 38.8961   9
   8   3  -9 3939.93 256.525   5
   8   3  -9 4028.15 309.171   9
   8   3  -8 2616.68 225.915   5
   8   3  -8 2463.19 261.484   9
   8   3  -7-43.9243 33.3707   9
   8   3  -7 6.39856 26.0174   5
   8   3  -6 659.674 122.752   5
   8   3  -6 539.504 130.972   9
   8   3  -5 3339.85 284.479   5
   8   3  -5 2652.77 298.442   9
   8   3  -4 4507.18 330.475   5
   8   3  -3 6851.36 407.384   5
   8   3  -2 8845.50 454.545   5
   8   3  -1 12511.5 508.546  10
   8   3  -1 12882.7 535.645   5
   8   3   0 286.582 86.1137  10
   8   3   0 112.095 48.2844   5
   8   3   1 4200.39 324.583  10
   8   3   1 4311.27 283.163   5
   8   3   2 759.929 136.615  10
   8   3   3 169.037 70.9895  10
   8   3   4 123.662 57.9997  10
   8   3   4 58.9977 24.1547   8
   8   3   5 86.0968 30.8277  10
   8   3   5 161.802 69.2437   8
   8   3   6 2003.82 230.015  10
   8   3   6 1806.67 207.785   8
   8   3   7 69.1779 41.3550  10
   8   3   7 61.8496 36.9418   8
   8   3   8 95.3957 43.4562  10
   8   3   8 143.091 47.2709   8
   8   3   9 337.227 82.9609   8
   8   3  10 30.1131 30.0606   8
   8   3  11 14.0772 9.85306   8
   8   4 -10 32.5315 18.9711   9
   8   4 -10 60.0743 22.1055   5
   8   4  -9 77.0848 35.2542   9
   8   4  -9 78.5368 33.4686   5
   8   4  -8 1.30163 24.8257   9
   8   4  -8 53.2359 31.1214   5
   8   4  -7 109.029 43.6601   9
   8   4  -7 119.525 41.1033   5
   8   4  -6 41.4436 46.9232   9
   8   4  -6 14.1112 5.22762   5
   8   4  -5 40.9049 9.73680   5
   8   4  -4 175.067 50.8944   5
   8   4  -3 124.839 57.6106   5
   8   4  -2 258.034 80.1087   5
   8   4  -1 1115.19 160.445  10
   8   4  -1 1297.71 167.735   5
   8   4   0 660.040 114.415   5
   8   4   0 532.290 104.218  10
   8   4   1 95.3023 51.9742  10
   8   4   1 29.7073 26.4709   5
   8   4   2 3930.37 318.422  10
   8   4   3 1118.80 173.889  10
   8   4   4 114.512 49.5920  10
   8   4   5 58.7283 43.2412  10
   8   4   5 8.99168 24.0181   8
   8   4   6-13.8743 39.9909  10
   8   4   6 8.55063 19.4985   8
   8   4   7 290.786 78.7618  10
   8   4   7 263.867 68.6933   8
   8   4   8 25.3414 21.6221  10
   8   4   8 21.5386 10.1391   8
   8   4   9 86.6415 36.0510   8
   8   4  10 457.146 79.0776   8
   8   4  11-5.67589 4.57264   8
   8   5  -9 104.630 32.2995   5
   8   5  -8-28.7477 26.2381   5
   8   5  -7 97.1724 41.0124   5
   8   5  -6 289.113 71.0406   5
   8   5  -5 300.718 78.5505   5
   8   5  -4 608.767 116.345   5
   8   5  -3 237.889 67.5346   5
   8   5  -2 495.646 96.1371   5
   8   5  -1 1559.85 184.397  10
   8   5  -1 1791.48 191.492   5
   8   5   0 2929.39 251.774  10
   8   5   0 2952.76 238.168   5
   8   5   1 992.892 154.473  10
   8   5   1 895.707 123.013   5
   8   5   2 346.952 86.3390  10
   8   5   3 321.050 81.3694  10
   8   5   4 287.271 83.5944  10
   8   5   5 934.268 147.114  10
   8   5   5 867.925 121.273   8
   8   5   6 269.574 76.4113  10
   8   5   6 258.858 63.2877   8
   8   5   7 10.2357 22.2523  10
   8   5   7 15.0762 22.8633   8
   8   5   8 96.8302 40.3490  10
   8   5   8 73.6544 35.7710   8
   8   5   9 1.16765 12.1711   8
   8   5  10 196.355 39.8399   8
   8   6  -8 29.1368 20.8640   5
   8   6  -7 126.851 38.7826   5
   8   6  -6 15.1131 20.8668   5
   8   6  -5 1456.43 160.873   5
   8   6  -4 281.699 70.3520   5
   8   6  -3 1048.39 141.047   5
   8   6  -2 238.708 63.7302  10
   8   6  -2 193.699 55.3945   5
   8   6  -1 339.499 76.0984  10
   8   6  -1 314.745 71.0216   5
   8   6   0 15.1905 18.3969  10
   8   6   0 32.0380 34.2857   5
   8   6   1 89.1419 43.3260  10
   8   6   1 151.523 51.6533   5
   8   6   2 447.614 96.6589  10
   8   6   3 70.6078 40.9768  10
   8   6   4 636.176 115.705  10
   8   6   5 31.5429 23.2325  10
   8   6   6 367.824 79.3485  10
   8   6   6 273.215 57.9159   8
   8   6   7 272.306 61.8194  10
   8   6   7 256.097 53.8940   8
   8   6   8 132.101 34.7888  10
   8   6   8 138.837 33.3898   8
   8   7  -7-6.02367 11.7979   5
   8   7  -6 0.91254 13.5697   5
   8   7  -5 290.439 61.6015   5
   8   7  -4 100.355 32.3640   5
   8   7  -3 95.3229 41.1893   5
   8   7  -2 47.4919 19.1355  10
   8   7  -2 68.3006 32.4069   5
   8   7  -1 87.7271 34.8470  10
   8   7  -1 94.1705 35.2226   5
   8   7   0 104.778 45.0908  10
   8   7   0 114.982 41.9589   5
   8   7   1 132.274 48.9530  10
   8   7   1 52.5110 24.9067   5
   8   7   2 988.510 131.604  10
   8   7   3 111.794 41.9794  10
   8   7   4 600.377 98.7405  10
   8   7   5 86.2142 31.3314  10
   8   7   6-35.5049 24.6165  10
   8   7   7 59.9748 23.2569  10
   8   8  -5 709.939 77.5555   5
   8   8  -4 356.119 58.9902   5
   8   8  -3 28.4205 19.1694   5
   8   8  -2 134.141 41.5500   5
   8   8  -1 125.763 39.2823  10
   8   8  -1 122.332 32.7404   5
   8   8   0-28.4761 24.1809  10
   8   8   0 19.9401 17.1448   5
   8   8   1 408.488 75.7064  10
   8   8   2 300.527 60.2474  10
   8   8   3 221.733 49.3764  10
   8   8   4 12.1476 11.8697  10
   8   8   5 383.800 59.2089  10
   9 -12  -3 21.3310 22.4927  11
   9 -12  -2 22.9819 9.43275  11
   9 -12  -1 100.429 29.6729  11
   9 -12   0-6.30268 16.0328  11
   9 -12   1 7.08634 13.5244  11
   9 -12   2 60.9498 16.4552  11
   9 -12   3 109.645 35.7212  11
   9 -11  -5 54.3655 42.4335  11
   9 -11  -4 104.428 44.5649  11
   9 -11  -3 69.1629 36.4678  11
   9 -11  -2 38.2484 37.2895   7
   9 -11  -2-95.6217 43.7178  11
   9 -11  -1 166.594 40.0490   7
   9 -11  -1 251.309 57.5076  11
   9 -11   0 380.807 75.8362   7
   9 -11   0 368.424 79.3944  11
   9 -11   1-18.1615 25.8600  11
   9 -11   2 345.730 74.6223  11
   9 -11   3 160.130 59.6767  11
   9 -11   4 40.6198 27.9315  11
   9 -11   5 218.951 57.5766  11
   9 -11   6 957.227 106.334  11
   9 -10  -6 79.7842 39.2932  11
   9 -10  -5 81.1753 16.2800   7
   9 -10  -5 92.7669 56.3163  11
   9 -10  -4 2.50904 21.3728   7
   9 -10  -4-12.1136 31.9312  11
   9 -10  -3 290.809 88.0511   7
   9 -10  -3 137.397 39.5412  11
   9 -10  -2 572.733 122.225   7
   9 -10  -2 450.626 91.6443  11
   9 -10  -1 974.266 155.452   7
   9 -10  -1 939.750 147.598  11
   9 -10   0 308.364 81.8147   7
   9 -10   0 313.340 87.8662  11
   9 -10   1 22.6708 37.2262   7
   9 -10   1-35.7305 35.6503  11
   9 -10   2 36.7129 39.6871  11
   9 -10   3-7.47986 20.6504  11
   9 -10   4 18.9771 4.63044  11
   9 -10   5 80.2007 40.2042  11
   9 -10   6 22.1106 23.5977  11
   9 -10   7-52.0733 29.8683  11
   9  -9  -6-12.4771 18.8856   7
   9  -9  -6 237.295 79.9680  11
   9  -9  -5 33.7729 43.0231   7
   9  -9  -5-45.0321 35.9144  11
   9  -9  -4 39.5047 31.4106   7
   9  -9  -4-51.3360 47.4709  11
   9  -9  -3 24.9803 43.9219   7
   9  -9  -3-25.0498 21.9355  11
   9  -9  -2 5.68312 22.2743   7
   9  -9  -2 40.0415 30.7793  11
   9  -9  -1 39.9352 46.8245   7
   9  -9  -1 22.0872 15.8950  11
   9  -9   0-5.98249 31.9408   7
   9  -9   0-38.1151 48.8051  11
   9  -9   1-3.29141 25.5515   7
   9  -9   1 0.13855 28.3752  11
   9  -9   2 291.463 80.7082   7
   9  -9   2 287.301 86.7160  11
   9  -9   3 609.327 127.117  11
   9  -9   4-0.53218 41.8316  11
   9  -9   5-25.8096 31.2231  11
   9  -9   6 8.77725 38.9212  11
   9  -9   7 8.79637 7.53382  11
   9  -9   8 91.8197 43.1313  11
   9  -9   9 0.12354 4.92209  11
   9  -8  -7 98.8760 43.8385   7
   9  -8  -6 369.173 107.879   7
   9  -8  -6 197.851 63.0568  11
   9  -8  -5 213.442 79.4960   7
   9  -8  -5 155.929 48.4904  11
   9  -8  -4 223.878 81.2992   7
   9  -8  -4 179.979 62.2221  11
   9  -8  -3 86.5888 46.2119   7
   9  -8  -3 68.5982 34.9397  11
   9  -8  -2 602.717 147.667   7
   9  -8  -2 389.569 93.6062  11
   9  -8  -1 401.938 118.509   7
   9  -8  -1 395.005 101.808  11
   9  -8   0 26.9693 32.9885   7
   9  -8   0-36.6245 49.9936  11
   9  -8   1 142.223 61.0805   7
   9  -8   1 118.242 27.4266  11
   9  -8   2 1184.82 182.758   7
   9  -8   2 1450.13 209.901  11
   9  -8   3 104.225 24.0241   7
   9  -8   3 99.6428 48.3539  11
   9  -8   4-61.4721 63.2294  11
   9  -8   5 229.080 77.4628  11
   9  -8   6 127.081 60.9000  11
   9  -8   7 395.176 96.0711  11
   9  -8   8 231.518 65.2212  11
   9  -8   9-5.39515 26.5764  11
   9  -7  -8 48.9940 30.3490   7
   9  -7  -7 132.232 60.3773   7
   9  -7  -6 400.898 114.235   7
   9  -7  -5 57.5000 36.9930   7
   9  -7  -4 815.844 166.053   7
   9  -7  -3 28.9696 55.7960   7
   9  -7  -3-15.0890 13.8162  11
   9  -7  -2 46.5099 50.0104   7
   9  -7  -2 64.2849 47.8846  11
   9  -7  -1 1075.03 199.356   7
   9  -7  -1 981.924 162.349  11
   9  -7   0 1088.11 195.942   7
   9  -7   0 1160.26 181.095  11
   9  -7   1 119.528 74.5445   7
   9  -7   1 80.1695 23.0600  11
   9  -7   2 493.103 126.308   7
   9  -7   2 486.307 123.468  11
   9  -7   3 829.140 156.007   7
   9  -7   3 1018.36 176.936  11
   9  -7   4 6985.85 425.868   7
   9  -7   4 7988.81 500.917  11
   9  -7   5 73.8298 22.5650  11
   9  -7   6 1378.88 196.662  11
   9  -7   7 174.934 72.8930  11
   9  -7   8 60.0181 20.2011  11
   9  -7   9 244.284 70.8542  11
   9  -7  10 29.3830 27.1077  11
   9  -6 -10-26.8342 21.6738  12
   9  -6  -9 82.0234 28.5430  12
   9  -6  -8 45.6293 42.0459   7
   9  -6  -8 4.86725 16.0952  12
   9  -6  -7 23.5463 36.4909   5
   9  -6  -7 24.1841 15.4263   7
   9  -6  -6 258.426 86.3970   5
   9  -6  -6 300.615 101.622   7
   9  -6  -5 144.120 67.0589   5
   9  -6  -5 135.380 68.6972   7
   9  -6  -4 26.4096 18.5449   5
   9  -6  -4 32.6628 48.3158   7
   9  -6  -3 1013.52 169.646   5
   9  -6  -3 1348.20 221.160   7
   9  -6  -2 622.253 131.176   5
   9  -6  -2 841.086 178.903   7
   9  -6  -1-6.23148 19.8286   5
   9  -6  -1 13.4891 41.7345   7
   9  -6   0 34.6435 43.6105   5
   9  -6   0 8.99891 30.8111   7
   9  -6   0-13.9795 26.0649  11
   9  -6   1 6.86989 42.6682   7
   9  -6   1 34.8186 12.1137  11
   9  -6   2-31.7423 44.1868  11
   9  -6   2-17.3919 18.5808   7
   9  -6   3 2804.75 301.782   7
   9  -6   3 3211.27 304.516  11
   9  -6   4 3825.52 335.550   7
   9  -6   4 4344.17 364.550  11
   9  -6   5 1271.68 181.277   8
   9  -6   5 1392.98 187.133   7
   9  -6   5 1530.54 213.119  11
   9  -6   6 352.566 100.399  11
   9  -6   6 317.059 89.3638   8
   9  -6   7 47.7346 45.4586  11
   9  -6   7-4.03269 26.2501   8
   9  -6   8 14.2194 13.2330  11
   9  -6   9 17.5450 14.1488  11
   9  -6  10 48.1468 16.5730  11
   9  -5 -11 11.3317 17.2764  12
   9  -5 -10 108.120 41.7478  12
   9  -5  -9 21.5324 10.7339  12
   9  -5  -8 201.915 67.4180   5
   9  -5  -8 151.699 58.5263   7
   9  -5  -8 196.044 64.2460  12
   9  -5  -7 27.6856 25.6378   5
   9  -5  -7 11.0279 7.27757   7
   9  -5  -7 37.3849 39.5779  12
   9  -5  -6 34.9477 34.9223   5
   9  -5  -6 37.6292 40.0873   7
   9  -5  -5 674.004 139.066   5
   9  -5  -5 708.305 151.583   7
   9  -5  -4 1307.60 196.315   5
   9  -5  -4 1407.25 226.501   7
   9  -5  -3 1849.68 230.110   5
   9  -5  -3 2059.82 275.691   7
   9  -5  -2 193.322 71.4074   5
   9  -5  -2 171.153 72.4437   7
   9  -5  -1 85.2858 41.3529   5
   9  -5  -1 10.2522 35.2660   7
   9  -5   0 17.4685 25.5520   5
   9  -5   0 24.0728 20.7820   7
   9  -5   1 280.577 82.9863   5
   9  -5   1 331.037 117.907   7
   9  -5   2 13.5924 34.2609   7
   9  -5   3 526.541 127.296  11
   9  -5   3 373.473 92.9672   8
   9  -5   3 397.583 111.920   7
   9  -5   4 3693.06 304.412   8
   9  -5   4 3974.16 354.047   7
   9  -5   4 4206.28 348.580  11
   9  -5   5 2528.93 256.318   8
   9  -5   5 2661.94 276.086   7
   9  -5   5 2649.21 275.750  11
   9  -5   6 3298.83 294.376   8
   9  -5   6 3143.85 278.896   7
   9  -5   6 3196.08 303.583  11
   9  -5   7 88.5401 54.7312  11
   9  -5   7 82.0847 25.7312   8
   9  -5   8 547.690 113.620  11
   9  -5   8 723.503 129.043   8
   9  -5   9 107.676 45.4912  11
   9  -5   9 92.6222 46.8420   8
   9  -5  10-8.64898 2.18882  11
   9  -5  10 6.93656 2.43960   8
   9  -5  11 57.1750 21.6578  11
   9  -4 -11-3.89701 18.7547  12
   9  -4 -10 829.747 122.694  12
   9  -4  -9 380.509 86.9244   5
   9  -4  -9 376.543 88.1995  12
   9  -4  -8 5.41822 22.9801   5
   9  -4  -8-15.1391 17.0785  12
   9  -4  -7-6.06036 32.4543   5
   9  -4  -7 59.1398 35.9066   7
   9  -4  -7-34.1380 42.3961  12
   9  -4  -6 88.0224 42.2645   5
   9  -4  -6 154.997 63.9367   7
   9  -4  -5 49.2415 37.3499   5
   9  -4  -5-39.0421 44.1627   7
   9  -4  -4 106.202 63.4479   5
   9  -4  -4 73.8625 40.4676   7
   9  -4  -3 36.3559 11.0919   5
   9  -4  -3-7.35959 56.6275   7
   9  -4  -2 125.320 63.8262   5
   9  -4  -2 88.2043 46.2964   7
   9  -4  -1 1768.55 217.592   5
   9  -4  -1 1829.85 256.420   7
   9  -4   0 2302.97 241.220   5
   9  -4   0 2177.69 278.087   7
   9  -4   1 241.751 78.0798   5
   9  -4   1 145.237 65.4822   7
   9  -4   2-35.5916 53.9666   7
   9  -4   3 30.1068 28.9066   8
   9  -4   3 44.5048 18.3484   7
   9  -4   4 69.1446 55.9886   8
   9  -4   4 10.7160 14.0719   7
   9  -4   5 1918.03 219.244   8
   9  -4   5 2031.90 248.677   7
   9  -4   6-19.4593 6.14263  11
   9  -4   6 24.9627 27.5858   8
   9  -4   6-18.0152 33.1709   7
   9  -4   7 63.3628 52.2347  11
   9  -4   7 32.4187 8.43499   8
   9  -4   7-15.0181 14.2338   7
   9  -4   8 763.842 135.883   8
   9  -4   8 653.122 127.358  11
   9  -4   9 37.5840 24.6588  11
   9  -4   9 31.4545 14.6832   8
   9  -4  10-16.8402 21.7682  11
   9  -4  10 1.77155 16.5706   8
   9  -4  11 47.3063 27.0584  11
   9  -4  11-13.1270 18.1510   8
   9  -3 -12 10.8284 13.7020  12
   9  -3 -11 47.4333 30.8361  12
   9  -3 -10 34.5665 28.7083   5
   9  -3 -10-31.9636 19.6451  12
   9  -3  -9 159.595 53.9926   5
   9  -3  -9 213.715 69.7484  12
   9  -3  -8 40.3178 17.2642   5
   9  -3  -8 84.5903 53.2292  12
   9  -3  -7 267.647 85.3835   5
   9  -3  -7 294.088 92.8259  12
   9  -3  -6-1.93285 17.9074   5
   9  -3  -6 19.0510 26.3978   7
   9  -3  -5 7.68629 26.1393   5
   9  -3  -5-35.0367 31.7441   7
   9  -3  -4 497.963 121.914   5
   9  -3  -4 451.399 121.270   7
   9  -3  -3 195.987 78.3524   5
   9  -3  -3 216.585 76.5616   7
   9  -3  -2 103.881 53.1075   5
   9  -3  -2 84.5221 46.3610   7
   9  -3  -1 305.985 80.7421   5
   9  -3  -1 304.210 104.888   7
   9  -3   0 1317.35 181.853   5
   9  -3   0 1359.59 217.754   7
   9  -3   1 335.564 88.7311   5
   9  -3   1 423.442 121.068   7
   9  -3   2 286.762 94.2945   7
   9  -3   3 1845.69 254.598   7
   9  -3   4 1826.44 204.917   8
   9  -3   4 2045.15 266.343   7
   9  -3   5 3835.03 309.699   8
   9  -3   5 4040.47 360.176   7
   9  -3   6 1553.10 200.966   8
   9  -3   6 1623.96 218.262   7
   9  -3   7 360.863 96.2344   8
   9  -3   7 396.092 98.4393   7
   9  -3   8-27.3827 36.5352   8
   9  -3   8-2.53623 20.9855   7
   9  -3   9 870.888 135.017   8
   9  -3   9 675.124 113.751  11
   9  -3  10 823.226 121.109   8
   9  -3  10 545.964 87.3202  11
   9  -3  11 41.1212 17.5355   8
   9  -3  12 76.1770 22.9168   8
   9  -2 -12 41.8359 24.7841  12
   9  -2 -11 108.274 45.2702  12
   9  -2 -10 7.00119 17.2562   5
   9  -2 -10 3.13843 19.8716  12
   9  -2  -9 462.729 94.5503   5
   9  -2  -9 475.280 107.529  12
   9  -2  -8 771.580 134.536   5
   9  -2  -8 634.311 126.918  12
   9  -2  -7 153.063 67.1180   5
   9  -2  -7 178.479 61.3683  12
   9  -2  -6 48.3215 21.5544   5
   9  -2  -6 16.7665 39.0327   7
   9  -2  -6 10.7867 35.0111  12
   9  -2  -5 788.117 148.157   5
   9  -2  -5 823.536 159.167   7
   9  -2  -5 735.183 132.894  12
   9  -2  -4 69.3812 54.5056   5
   9  -2  -4-4.42151 34.9252   7
   9  -2  -3 639.654 132.005   5
   9  -2  -3 556.096 133.003   7
   9  -2  -2 48.1580 38.1925   5
   9  -2  -2 52.5609 39.3362   7
   9  -2  -1 594.573 120.421   5
   9  -2  -1 607.079 145.072   7
   9  -2   0 456.105 98.7528   5
   9  -2   0 478.178 128.668   7
   9  -2   1 914.226 143.400   5
   9  -2   1 821.183 171.932   7
   9  -2   2 9.67452 16.3415   7
   9  -2   3 1192.33 204.469   7
   9  -2   4 1210.04 164.823   8
   9  -2   4 1314.53 215.804   7
   9  -2   5 125.348 51.0419   8
   9  -2   5 70.2268 21.9226   7
   9  -2   6 186.554 68.7123   8
   9  -2   6 188.114 67.6981   7
   9  -2   7 180.342 64.9296   8
   9  -2   7 188.314 71.4099   7
   9  -2   8 95.6684 50.7197   8
   9  -2   8 23.8066 8.26775   7
   9  -2   9 1.96529 33.2711   8
   9  -2  10 602.622 102.934   8
   9  -2  11 143.176 44.4160   8
   9  -2  12 33.3132 17.7713   8
   9  -1 -12 55.4285 27.1349  12
   9  -1 -11 382.688 85.8881  12
   9  -1 -10 65.3518 30.5669   5
   9  -1 -10 102.207 46.9749  12
   9  -1  -9-4.64673 8.72620   5
   9  -1  -9 16.9998 18.1145  12
   9  -1  -8 781.965 132.590   5
   9  -1  -8 779.286 145.712  12
   9  -1  -7 63.2106 47.2887   5
   9  -1  -7 51.6392 26.7753  12
   9  -1  -6 1333.35 182.889   5
   9  -1  -6 1206.80 184.000  12
   9  -1  -5 1829.31 217.675   5
   9  -1  -5 1661.08 210.562   7
   9  -1  -5 1612.41 208.465  12
   9  -1  -4 95.5716 38.9067   5
   9  -1  -4 76.9450 42.6567   7
   9  -1  -3 1712.16 207.734   5
   9  -1  -3 1565.94 225.896   7
   9  -1  -2 189.692 70.1670   5
   9  -1  -2 105.322 49.3695   7
   9  -1  -1 370.957 91.5845   5
   9  -1  -1 406.803 112.573   7
   9  -1   0 312.196 82.8285   5
   9  -1   0 354.068 110.151   7
   9  -1   1 937.158 142.424  10
   9  -1   1 914.685 134.439   5
   9  -1   1 921.782 178.718   7
   9  -1   2 1162.90 167.805  10
   9  -1   3 157.665 58.8179  10
   9  -1   4 2049.96 213.629   8
   9  -1   5 3513.59 286.950   8
   9  -1   6 165.885 62.5561   8
   9  -1   7 1045.82 155.802   8
   9  -1   8 221.120 71.7512   8
   9  -1   8 174.395 69.1052   7
   9  -1   9 110.369 48.2475   8
   9  -1   9 75.3722 50.5634   7
   9  -1  10 250.843 66.4289   8
   9  -1  11 389.665 74.1570   8
   9  -1  12 391.577 59.3448   8
   9   0 -11 90.5730 43.6200  12
   9   0 -10 49.2620 24.8044   5
   9   0 -10 48.2094 26.2074  12
   9   0  -9 42.7467 22.0762   5
   9   0  -9 66.1450 44.2947  12
   9   0  -8 160.528 58.0219   5
   9   0  -8 175.348 76.0909  12
   9   0  -7 655.510 122.790   5
   9   0  -7 530.755 128.720  12
   9   0  -6 4162.19 321.050   5
   9   0  -6 3185.90 309.556  12
   9   0  -5 8888.09 474.013   5
   9   0  -5 7026.54 462.406  12
   9   0  -4-41.6397 26.7662   5
   9   0  -4 6.53947 16.1774  12
   9   0  -3 1199.03 168.162   5
   9   0  -3 1054.70 174.307   7
   9   0  -2 12.5960 19.8050   5
   9   0  -2 76.6962 47.9486   7
   9   0  -1 95.9127 42.1683   5
   9   0  -1 111.211 61.3106   7
   9   0   0 35.8890 32.1641   5
   9   0   0 52.7897 51.3563   7
   9   0   1-7.24401 30.0861  10
   9   0   1-54.3066 39.7051   5
   9   0   2 574.046 115.707  10
   9   0   3 3551.65 290.467  10
   9   0   4 169.132 57.3619  10
   9   0   5 3289.63 286.098  10
   9   0   5 2940.73 259.850   8
   9   0   6 737.935 130.309   8
   9   0   7 125.414 51.8647   8
   9   0   8 28.1793 32.3045   8
   9   0   9 45.1900 37.7545   8
   9   0  10 148.539 44.4445   8
   9   0  10 233.788 54.9238   7
   9   0  11 673.648 90.4938   8
   9   1 -10 41.5286 21.7281   5
   9   1  -9 62.8117 34.6390   5
   9   1  -8 142.439 57.2235   5
   9   1  -8 57.5234 47.6825  12
   9   1  -7 871.970 138.436   5
   9   1  -7 755.275 152.382  12
   9   1  -6 1871.99 209.718   5
   9   1  -6 1374.35 204.948  12
   9   1  -5 1745.36 203.841   5
   9   1  -4 3612.22 295.810   5
   9   1  -3 2045.25 219.372   5
   9   1  -3 1784.56 214.670   7
   9   1  -2 996.657 150.577   5
   9   1  -2 863.820 164.099   7
   9   1  -1 881.363 138.956   5
   9   1  -1 717.887 149.177   7
   9   1   0 154.442 53.0149   5
   9   1   0 216.705 89.8243   7
   9   1   1 79.7040 46.0351  10
   9   1   1 82.4124 48.7500   5
   9   1   2 93.0639 33.6922  10
   9   1   3 30.1987 28.2710  10
   9   1   4 202.552 63.3821  10
   9   1   5 763.495 139.548  10
   9   1   5 901.715 138.053   8
   9   1   6 5.21750 14.8558  10
   9   1   6-27.9445 22.3188   8
   9   1   7 200.559 63.0607   8
   9   1   8 15.3792 19.5017   8
   9   1   9 10.1109 14.8881   8
   9   1  10 229.710 57.5280   8
   9   1  10 179.102 47.1746   7
   9   1  11 494.476 71.9202   8
   9   2 -10 29.7628 19.5733   5
   9   2  -9 65.6562 30.0759   5
   9   2  -8 33.2588 26.6159   5
   9   2  -7 1112.91 147.745   5
   9   2  -6 896.182 137.651   5
   9   2  -5 19.8131 27.0609   5
   9   2  -4 2723.59 248.936   5
   9   2  -3 1369.25 174.318   5
   9   2  -2 1105.56 155.500   5
   9   2  -2 964.407 159.813   7
   9   2  -1 225.394 68.3660   5
   9   2  -1 223.748 77.8216   7
   9   2   0 122.263 51.3365  10
   9   2   0 146.552 42.5376   5
   9   2   1 188.524 57.8264  10
   9   2   1 285.958 70.4853   5
   9   2   2 1599.82 190.149  10
   9   2   3 1229.56 173.940  10
   9   2   4 1204.22 172.502  10
   9   2   5 741.179 130.425  10
   9   2   5 759.188 121.442   8
   9   2   6-1.55985 16.8153  10
   9   2   6 68.1802 45.7042   8
   9   2   7 16.8145 13.8520  10
   9   2   7 24.1074 18.7922   8
   9   2   8 6.62078 9.21093   8
   9   2   9 13.0317 25.5975   8
   9   2  10 27.9226 1.91266   8
   9   2  10-4.84324 11.9279   7
   9   3  -9-6.62332 19.9648   5
   9   3  -8 385.513 76.9026   5
   9   3  -7 78.1977 31.7917   5
   9   3  -6 278.140 73.9399   5
   9   3  -5 37.6171 29.9175   5
   9   3  -4 228.103 66.3856   5
   9   3  -3 1742.34 190.276   5
   9   3  -2 2249.03 219.708   5
   9   3  -1 377.052 84.3220   5
   9   3  -1 291.550 89.6899   7
   9   3   0 64.7567 24.4548  10
   9   3   0 136.289 52.1655   5
   9   3   1-6.73243 23.4028  10
   9   3   1 29.9733 16.0322   5
   9   3   2 220.292 74.3219  10
   9   3   3 369.016 87.7890  10
   9   3   4 19.7100 35.3609  10
   9   3   5 48.9755 3.39804  10
   9   3   6 910.412 134.679  10
   9   3   6 787.394 114.776   8
   9   3   7 81.2429 41.9135  10
   9   3   7 17.8306 7.15880   8
   9   3   8 77.6859 39.0430   8
   9   3   9 164.785 42.7821   8
   9   4  -9 50.2763 24.0655   5
   9   4  -8 314.103 60.1267   5
   9   4  -7 87.0546 32.2513   5
   9   4  -6 41.9232 31.1965   5
   9   4  -5 649.691 108.271   5
   9   4  -4 972.592 134.981   5
   9   4  -3 51.7883 37.5394   5
   9   4  -2 4788.64 303.259   5
   9   4  -1 60.1493 31.9319   5
   9   4   0 211.322 62.6858  10
   9   4   0 196.943 58.1106   5
   9   4   1 107.473 54.4795  10
   9   4   1 72.0188 12.3141   5
   9   4   2-22.2339 39.8668  10
   9   4   3-13.7704 35.3601  10
   9   4   4 540.927 107.422  10
   9   4   5 41.2997 26.8658  10
   9   4   6 426.052 84.7899  10
   9   4   7 384.364 74.8878  10
   9   4   7 194.521 47.0537   8
   9   4   8 59.2672 28.4362   8
   9   5  -8-0.65168 12.1677   5
   9   5  -7 209.012 47.9676   5
   9   5  -6 19.7337 21.5690   5
   9   5  -5 126.936 38.9606   5
   9   5  -4-3.86229 21.5626   5
   9   5  -3 483.628 86.1539   5
   9   5  -2 2488.50 202.431   5
   9   5  -1 47.9012 28.1428   5
   9   5   0 333.414 75.2267  10
   9   5   0 279.062 61.1171   5
   9   5   1 25.3780 28.0155  10
   9   5   2 52.1466 36.8568  10
   9   5   3 50.1754 28.6339  10
   9   5   4 12.1447 11.7053  10
   9   5   5 510.813 89.4131  10
   9   5   6 771.347 102.670  10
   9   5   7 65.7557 27.7860  10
   9   6  -6 165.788 42.4613   5
   9   6  -5 85.2399 31.2441   5
   9   6  -4 583.399 84.7520   5
   9   6  -3 24.0220 15.2256   5
   9   6  -2 264.127 57.5401   5
   9   6  -1 592.704 83.1050   5
   9   6   0 534.507 85.1044  10
   9   6   0 533.956 74.1199   5
   9   6   1 5.89104 18.0112  10
   9   6   2 157.948 49.8580  10
   9   6   3 150.898 48.7608  10
   9   6   4 119.479 38.2291  10
   9   6   5-11.4465 6.25573  10
   9   6   6-14.2510 17.9670  10
   9   7  -4 344.336 50.0788   5
   9   7  -3 1.27753 9.26347   5
   9   7  -2 45.1745 22.5241   5
   9   7  -1 199.885 37.7895   5
   9   7   0-0.28178 15.7280  10
   9   7   1 30.4585 20.2057  10
   9   7   2 390.716 61.4350  10
   9   7   3 214.971 45.1867  10
   9   7   4 249.891 46.5293  10
  10 -11   0 8.00906 13.6449  11
  10 -11   1-17.2185 4.71846  11
  10 -11   2-44.8452 24.6870  11
  10 -10  -4-9.17754 54.0737   7
  10 -10  -3-1.32040 12.1376   7
  10 -10  -3 90.3956 30.0822  11
  10 -10  -2 2.98556 17.3407   7
  10 -10  -2-66.6818 35.6713  11
  10 -10  -1 2.25439 8.76175   7
  10 -10  -1 67.4297 22.7482  11
  10 -10   0 38.7521 30.1338   7
  10 -10   0 54.1877 31.5059  11
  10 -10   1 54.1939 26.2262   7
  10 -10   1 38.8996 31.0522  11
  10 -10   2 44.5077 26.4265  11
  10 -10   3 185.609 52.7774  11
  10 -10   4 307.398 63.0666  11
  10 -10   5 0.11807 17.3781  11
  10  -9  -6-62.4414 18.8935   7
  10  -9  -5 66.3365 38.0936   7
  10  -9  -4 26.5113 30.8376   7
  10  -9  -3-4.16951 18.2993   7
  10  -9  -3-9.81283 22.7665  11
  10  -9  -2 12.2782 18.5759   7
  10  -9  -2-12.9299 30.5851  11
  10  -9  -1-51.5501 36.1180   7
  10  -9  -1-15.7661 27.0252  11
  10  -9   0 73.5335 41.0973   7
  10  -9   0 57.3906 12.4610  11
  10  -9   1 1280.96 161.523   7
  10  -9   1 1283.12 159.879  11
  10  -9   2-0.38128 21.5669   7
  10  -9   2 36.8265 5.96501  11
  10  -9   3 548.825 99.3678  11
  10  -9   4 131.297 49.3231  11
  10  -9   5 100.947 37.9036  11
  10  -9   6 32.3809 13.9299  11
  10  -8  -7-108.878 49.5917   7
  10  -8  -6 491.743 103.076   7
  10  -8  -5 786.015 136.280   7
  10  -8  -4-17.9448 20.5259   7
  10  -8  -3 190.983 78.2039   7
  10  -8  -2 6.63912 31.4133   7
  10  -8  -1 84.8219 56.0521   7
  10  -8  -1 59.5171 33.5604  11
  10  -8   0 9.35923 13.6617   7
  10  -8   0 3.94841 3.87427  11
  10  -8   1 421.073 104.989   7
  10  -8   1 416.137 91.3733  11
  10  -8   2 516.710 109.125   7
  10  -8   2 493.483 101.164  11
  10  -8   3 233.730 63.6203   7
  10  -8   3 251.937 62.5751  11
  10  -8   4-23.7297 18.4611  11
  10  -8   5 547.340 99.2002  11
  10  -8   6 5.52233 17.9060  11
  10  -8   7 46.2784 22.2681  11
  10  -7  -7 131.543 52.0745   7
  10  -7  -6 259.767 81.5292   7
  10  -7  -5 14.4357 24.5269   7
  10  -7  -4 85.6422 26.7948   7
  10  -7  -3 184.667 76.4770   7
  10  -7  -2 72.1450 37.8765   7
  10  -7  -1 68.7984 40.7476   7
  10  -7   0 17.0689 39.8367   7
  10  -7   1 55.5388 49.8026   7
  10  -7   1 63.3828 27.0573  11
  10  -7   2-26.1779 34.4767   7
  10  -7   2 4.56575 8.36856  11
  10  -7   3 87.7651 48.2037   7
  10  -7   3 185.380 68.9803  11
  10  -7   4 139.477 53.3620   7
  10  -7   4 181.475 62.2235  11
  10  -7   5 306.897 77.8148  11
  10  -7   6-5.79115 13.7489  11
  10  -7   7 0.57478 25.3269  11
  10  -7   8-36.3410 26.4114  11
  10  -6  -8-0.74123 25.2062   7
  10  -6  -7 44.4864 33.8282   7
  10  -6  -6 23.1973 22.9687   7
  10  -6  -5 534.160 111.223   5
  10  -6  -5 516.468 122.253   7
  10  -6  -4 596.541 121.129   5
  10  -6  -4 543.349 130.179   7
  10  -6  -3 83.5898 42.2358   5
  10  -6  -3 83.9909 53.1138   7
  10  -6  -2 47.6304 29.8521   5
  10  -6  -2 42.9709 31.3196   7
  10  -6  -1-0.12060 35.8930   5
  10  -6  -1-25.2097 33.2090   7
  10  -6   0 16.9132 18.1011   7
  10  -6   1 71.8921 58.2235   7
  10  -6   2 259.313 96.5591   7
  10  -6   3-13.4870 23.3979   7
  10  -6   4 4130.21 324.837   7
  10  -6   4 3907.13 280.909  11
  10  -6   5 1421.36 169.035   7
  10  -6   5 1437.78 165.547  11
  10  -6   6 20.7782 28.8518  11
  10  -6   7 49.8231 18.5132  11
  10  -6   8 56.1168 35.4228  11
  10  -5  -7 126.419 48.4458   5
  10  -5  -7 150.677 53.3631   7
  10  -5  -6-0.11251 31.4558   5
  10  -5  -6-31.4271 45.6194   7
  10  -5  -5 100.157 52.8851   5
  10  -5  -5 65.1866 41.3909   7
  10  -5  -4-24.4991 36.2680   5
  10  -5  -4 26.0348 45.6292   7
  10  -5  -3 590.246 128.564   5
  10  -5  -3 485.701 127.016   7
  10  -5  -2 83.2577 36.5321   5
  10  -5  -2 94.2878 51.6517   7
  10  -5  -1 60.3513 39.5893   5
  10  -5  -1 60.6375 39.7042   7
  10  -5   0-10.8785 34.8266   5
  10  -5   0 33.5336 28.1181   7
  10  -5   1 57.0405 28.7804   5
  10  -5   1 134.937 54.1819   7
  10  -5   2 1035.19 184.890   7
  10  -5   3 3564.33 332.711   7
  10  -5   4 812.804 149.870   7
  10  -5   5 140.658 60.1542   7
  10  -5   6 451.347 93.9000   8
  10  -5   6 497.063 98.9915   7
  10  -4  -9-8.04607 8.14162  12
  10  -4  -8-0.88995 20.5982   5
  10  -4  -7 286.327 76.6514   5
  10  -4  -7 271.132 70.6264   7
  10  -4  -6 36.8314 34.4097   5
  10  -4  -6-11.4893 15.3014   7
  10  -4  -5 40.3241 34.6444   5
  10  -4  -5-2.88823 18.3806   7
  10  -4  -4 258.407 86.9425   5
  10  -4  -4 112.564 66.2770   7
  10  -4  -3-28.7376 16.1197   5
  10  -4  -3 52.6820 54.4900   7
  10  -4  -2 398.086 105.528   5
  10  -4  -2 331.550 105.177   7
  10  -4  -1 422.093 100.781   5
  10  -4  -1 309.129 107.046   7
  10  -4   0 153.969 73.6216   5
  10  -4   0 79.4030 27.2746   7
  10  -4   1 126.065 52.0945   5
  10  -4   1 107.516 45.8154   7
  10  -4   2 110.589 51.6464   7
  10  -4   3 985.287 176.943   7
  10  -4   4-37.2917 49.6102   8
  10  -4   4 30.4862 26.7848   7
  10  -4   5 287.673 78.9409   8
  10  -4   5 302.452 87.9161   7
  10  -4   6 32.1121 19.5549   8
  10  -4   6 86.8234 47.6155   7
  10  -4   7 686.753 112.231   8
  10  -4   7 877.298 125.265   7
  10  -4   8 41.8977 29.1745   8
  10  -4   9 311.506 63.7326   8
  10  -3 -10-13.0100 12.3290  12
  10  -3  -9 57.6438 27.2800   5
  10  -3  -9 15.9378 25.9569  12
  10  -3  -8 111.019 41.3895   5
  10  -3  -8 122.373 47.0667  12
  10  -3  -7 217.309 63.5756   5
  10  -3  -6 264.456 82.3165   5
  10  -3  -6 241.294 70.9360   7
  10  -3  -5-14.7408 39.5248   5
  10  -3  -5 5.84062 42.6373   7
  10  -3  -4 105.929 43.1479   5
  10  -3  -4 55.0720 32.0166   7
  10  -3  -3 99.4467 61.4043   5
  10  -3  -3 93.9131 34.8035   7
  10  -3  -2 15.5482 34.3525   5
  10  -3  -2 9.03076 23.7818   7
  10  -3  -1 1212.30 170.337   5
  10  -3  -1 1272.84 207.845   7
  10  -3   0 611.099 120.504   5
  10  -3   0 576.422 141.350   7
  10  -3   1 35.8735 26.8436   5
  10  -3   1 38.9003 27.6988   7
  10  -3   2-35.9915 18.7815   7
  10  -3   3 158.055 62.5271   7
  10  -3   4-2.47884 5.71953   7
  10  -3   5 9.76748 15.9228   8
  10  -3   5 6.01857 13.7938   7
  10  -3   6 5.97258 17.2727   8
  10  -3   6-13.4342 20.2741   7
  10  -3   7 429.897 86.5462   8
  10  -3   7 459.694 97.4919   7
  10  -3   8-31.3685 16.1285   8
  10  -3   8-35.2445 34.3862   7
  10  -3   9 224.181 54.2219   8
  10  -3  10-46.6708 20.6179   8
  10  -2  -9 15.6265 22.1656   5
  10  -2  -9-2.15075 24.9425  12
  10  -2  -8 450.762 84.4091   5
  10  -2  -8 434.633 90.0425  12
  10  -2  -7 301.343 79.0757   5
  10  -2  -7 251.320 69.0420  12
  10  -2  -6 54.3555 33.5079   5
  10  -2  -5 216.036 76.3044   5
  10  -2  -5 152.876 45.8689   7
  10  -2  -4 211.945 75.1620   5
  10  -2  -4 186.584 75.9869   7
  10  -2  -3 25.4232 38.7823   5
  10  -2  -3-7.28721 51.0685   7
  10  -2  -2 372.444 93.2188   5
  10  -2  -2 345.119 106.405   7
  10  -2  -1 622.706 120.011   5
  10  -2  -1 621.506 146.916   7
  10  -2   0 732.224 124.992   5
  10  -2   0 621.563 145.395   7
  10  -2   1-33.3131 20.2946   5
  10  -2   1 17.4728 7.51094   7
  10  -2   2 1480.71 224.938   7
  10  -2   3 852.197 167.007   7
  10  -2   4 4.20600 42.7623   7
  10  -2   5 51.0358 30.2080   8
  10  -2   5 30.3683 25.3968   7
  10  -2   6 283.529 67.6628   8
  10  -2   6 356.438 96.0901   7
  10  -2   7 31.1732 14.7269   8
  10  -2   7 56.0644 30.6896   7
  10  -2   8 263.672 65.4570   8
  10  -2   8 455.561 88.6628   7
  10  -2   9 394.936 70.3794   8
  10  -2  10 15.1884 7.25294   8
  10  -1  -9 52.5463 26.4915   5
  10  -1  -8 27.3267 17.8089   5
  10  -1  -7 288.511 80.6337   5
  10  -1  -6 764.443 128.375   5
  10  -1  -5 228.304 71.4306   5
  10  -1  -4 1974.66 219.225   5
  10  -1  -4 1537.46 196.373   7
  10  -1  -3 85.5016 45.1915   5
  10  -1  -3 43.8050 20.9704   7
  10  -1  -2-0.11767 5.66094   5
  10  -1  -2-8.93723 12.6039   7
  10  -1  -1 328.980 84.7573   5
  10  -1  -1 356.982 101.867   7
  10  -1   0 91.2685 43.5421   5
  10  -1   0 87.5504 55.0398   7
  10  -1   1-8.74411 29.1918   7
  10  -1   2 1490.19 224.405   7
  10  -1   3 555.226 137.803   7
  10  -1   4 93.4240 37.3557   7
  10  -1   5 155.039 70.8441   7
  10  -1   6-21.4565 15.3818   8
  10  -1   6 69.8033 48.2505   7
  10  -1   7 244.032 63.7359   8
  10  -1   7 272.838 82.6310   7
  10  -1   8 1874.57 166.631   8
  10  -1   8 2175.84 195.209   7
  10  -1   9 1433.71 134.404   8
  10  -1   9 1425.52 126.806   7
  10  -1  10 31.7220 18.9654   8
  10   0  -9 21.3211 17.4348   5
  10   0  -8 161.947 49.6445   5
  10   0  -7 201.636 63.2507   5
  10   0  -6 743.615 120.986   5
  10   0  -5 4330.70 316.539   5
  10   0  -4 3541.80 285.998   5
  10   0  -3 24.7440 11.2179   5
  10   0  -3 47.1391 18.0637   7
  10   0  -2 103.975 31.7559   5
  10   0  -2 68.6358 37.8567   7
  10   0  -1 21.0263 23.2513   5
  10   0  -1 0.90793 4.68185   7
  10   0   0 2074.49 199.996   5
  10   0   0 2159.00 259.360   7
  10   0   1 547.941 126.569   7
  10   0   2 375.692 115.064   7
  10   0   3 274.959 87.7243   7
  10   0   4 65.2388 51.9446   7
  10   0   5 7.59377 23.2211   7
  10   0   6 14.5098 25.9350   8
  10   0   6 2.80329 21.8571   7
  10   0   7 104.019 39.2377   8
  10   0   7 106.696 46.5288   7
  10   0   8 441.066 75.0111   8
  10   0   8 592.245 102.531   7
  10   0   9 39.2592 16.3913   8
  10   0   9 54.6072 22.8153   7
  10   1  -9 361.693 59.6285   5
  10   1  -8-20.9222 25.5238   5
  10   1  -7 846.001 118.789   5
  10   1  -6 287.445 72.9608   5
  10   1  -5 746.196 118.623   5
  10   1  -4 662.569 114.650   5
  10   1  -3 2488.08 229.105   5
  10   1  -2 877.761 133.298   5
  10   1  -2 710.561 127.754   7
  10   1  -1 747.804 121.438   5
  10   1  -1 606.850 127.779   7
  10   1   0 48.3613 35.1475   5
  10   1   0 13.3650 27.8603   7
  10   1   1 609.164 97.6050  10
  10   1   1 645.351 138.472   7
  10   1   2 223.909 62.4510  10
  10   1   2 234.637 89.3264   7
  10   1   3 520.834 104.206  10
  10   1   3 517.783 121.452   7
  10   1   7 2.20634 18.8141   8
  10   1   7-16.5828 12.8605   7
  10   1   8 29.2553 5.92734   8
  10   1   8 14.6417 9.20366   7
  10   1   9 32.4144 21.9337   7
  10   2  -8 27.4678 19.6912   5
  10   2  -7-12.9095 27.0113   5
  10   2  -6 293.170 71.3214   5
  10   2  -5 502.326 94.2637   5
  10   2  -4 5.23096 6.90508   5
  10   2  -3 618.083 110.783   5
  10   2  -2 206.175 64.3377   5
  10   2  -1 77.7671 35.1507   5
  10   2  -1 106.844 53.0922   7
  10   2   0 1336.99 142.271   5
  10   2   0 1287.13 178.958   7
  10   2   1 1562.79 156.140  10
  10   2   1 1399.76 190.394   7
  10   2   2 327.909 74.8678  10
  10   2   2 287.598 86.4578   7
  10   2   3 67.6724 29.5912  10
  10   2   4-20.5861 32.3479  10
  10   2   7 20.1011 28.2477   7
  10   2   8 24.9125 21.3799   7
  10   3  -8 97.9148 26.6180   5
  10   3  -7-10.4796 15.5291   5
  10   3  -6 172.241 47.5099   5
  10   3  -5 106.937 36.5029   5
  10   3  -4 493.709 86.2752   5
  10   3  -3 20.6209 18.1492   5
  10   3  -2 139.360 46.6468   5
  10   3  -1 26.2400 21.1801   5
  10   3   0 200.981 53.6434   5
  10   3   0 145.063 50.0121   7
  10   3   1-29.7969 27.1000  10
  10   3   1-31.2734 44.5116   7
  10   3   2 59.2807 32.0050  10
  10   3   2 47.4036 30.2828   7
  10   3   3 125.848 46.2101  10
  10   3   3 101.650 50.3475   7
  10   3   4 179.243 53.0285  10
  10   3   5 252.116 59.7111  10
  10   3   7 141.634 43.5891   7
  10   4  -7-17.4885 11.7406   5
  10   4  -6 13.5482 6.27366   5
  10   4  -5 83.9530 33.0996   5
  10   4  -4 79.2021 31.3527   5
  10   4  -3 608.874 89.8919   5
  10   4  -2 49.6211 25.0357   5
  10   4  -1 50.9494 25.7010   5
  10   4   0 1271.96 114.754   5
  10   4   1 95.8378 26.9048  10
  10   4   1 113.953 41.7059   7
  10   4   2 458.697 79.6943  10
  10   4   2 459.211 88.1857   7
  10   4   3 127.993 39.7809  10
  10   4   3 114.652 40.4413   7
  10   4   4 14.3987 5.83545  10
  10   4   4 9.82046 8.10722   7
  10   4   5 88.9421 34.1377  10
  10   4   5-5.36139 17.2330   7
  10   4   6 338.723 65.7452   7
  10   5  -5-29.1971 21.6841   5
  10   5  -4-24.8480 14.2803   5
  10   5  -3 50.3163 24.1256   5
  10   5  -2 136.588 34.5081   5
  10   5  -1 768.974 80.9233   5
  10   5   1 93.3390 27.6839  10
  10   5   2 114.008 29.9302  10
  10   5   3 0.55684 9.73915  10
  10   5   3 44.4349 19.9827   7
  10   5   4 149.425 38.3047  10
  10   5   4 154.482 41.3931   7
  11  -9  -4 75.3851 31.7471   7
  11  -9  -3-10.8852 14.9295   7
  11  -9  -2 144.206 50.9031   7
  11  -9  -1-9.03858 16.5466   7
  11  -9   0-17.8187 26.0305   7
  11  -9   1 301.378 58.7178   7
  11  -8  -5 239.848 62.9165   7
  11  -8  -4 36.6115 28.5010   7
  11  -8  -3 10.7722 30.5122   7
  11  -8  -2 77.2029 38.2346   7
  11  -8  -1-54.7832 48.4247   7
  11  -8   0 21.3468 10.4054   7
  11  -8   1 1257.91 151.274   7
  11  -8   2 1453.24 148.409   7
  11  -8   3 214.453 49.6656   7
  11  -7  -6 48.5106 18.8743   7
  11  -7  -5 269.747 67.4930   7
  11  -7  -4 96.8242 41.2607   7
  11  -7  -3 118.231 49.5220   7
  11  -7  -2-5.00907 15.9005   7
  11  -7  -1 42.9679 20.1254   7
  11  -7   0 52.1968 40.7353   7
  11  -7   1-18.8981 41.7456   7
  11  -7   2 204.801 61.9566   7
  11  -7   3 1630.73 167.443   7
  11  -7   4 589.607 85.2505   7
  11  -6  -6 21.0945 31.1876   7
  11  -6  -5 171.782 51.2206   7
  11  -6  -4 29.0118 28.6589   7
  11  -6  -3 338.297 92.2812   7
  11  -6  -2 253.234 78.9273   7
  11  -6  -1 68.4509 45.8119   7
  11  -6   0 114.234 62.4085   7
  11  -6   1 44.0636 39.1857   7
  11  -6   2 13.6236 18.2173   7
  11  -6   3 118.632 52.5925   7
  11  -6   4 624.210 102.968   7
  11  -6   5 130.192 44.3658   7
  11  -5  -6 283.000 65.3182   7
  11  -5  -5 120.860 44.4213   5
  11  -5  -5 84.5776 38.0852   7
  11  -5  -4 65.4393 33.9916   5
  11  -5  -4 54.1933 33.7643   7
  11  -5  -3 65.3055 44.8719   5
  11  -5  -3 88.9054 49.8581   7
  11  -5  -2 794.024 123.523   5
  11  -5  -2 678.498 135.571   7
  11  -5  -1 733.688 113.206   5
  11  -5  -1 693.776 142.356   7
  11  -5   0 137.142 58.5480   7
  11  -5   1 1129.82 177.192   7
  11  -5   2 2865.35 274.812   7
  11  -5   3 599.811 120.126   7
  11  -5   4 203.686 62.2015   7
  11  -5   5 484.461 90.4264   7
  11  -5   6 66.6081 26.8480   7
  11  -4  -7 23.7136 27.7223   5
  11  -4  -6 165.893 53.2159   5
  11  -4  -6 105.683 43.1272   7
  11  -4  -5 287.655 80.3028   5
  11  -4  -5 217.390 63.5351   7
  11  -4  -4-6.56150 29.9455   5
  11  -4  -4 35.3305 35.6010   7
  11  -4  -3 26.7203 16.0523   5
  11  -4  -3 44.7741 26.6192   7
  11  -4  -2 84.8792 21.6797   5
  11  -4  -2-10.4537 10.0273   7
  11  -4  -1 49.8997 25.4220   5
  11  -4  -1-1.12032 8.54258   7
  11  -4   0 8.09928 26.1620   5
  11  -4   0 83.9733 45.6060   7
  11  -4   1 113.541 49.3831   7
  11  -4   2 42.7849 35.2394   7
  11  -4   3 379.000 96.0232   7
  11  -4   4-0.91496 5.92904   7
  11  -4   5-19.8554 21.1099   7
  11  -4   6 85.8681 35.9599   7
  11  -3  -8 584.092 78.3430   5
  11  -3  -7 2023.04 171.339   5
  11  -3  -6 173.639 51.8438   5
  11  -3  -5 275.300 67.3131   5
  11  -3  -5 174.565 55.2831   7
  11  -3  -4-9.26960 19.9278   5
  11  -3  -4 25.0936 16.2342   7
  11  -3  -3 29.9972 32.4912   5
  11  -3  -3 6.38238 7.13651   7
  11  -3  -2-0.20053 13.2311   5
  11  -3  -2 43.9791 39.7684   7
  11  -3  -1-4.03851 3.72896   5
  11  -3  -1 47.4757 36.2807   7
  11  -3   0 308.237 73.3068   5
  11  -3   0 234.317 81.5133   7
  11  -3   1 311.335 97.7562   7
  11  -3   2 65.9569 40.6833   7
  11  -3   3 4.24036 19.5065   7
  11  -3   4 146.356 55.7129   7
  11  -3   5 256.445 69.6728   7
  11  -3   6 89.8455 35.3218   7
  11  -3   7 6.05487 11.5671   7
  11  -2  -8 1098.26 107.124   5
  11  -2  -7 1441.61 144.029   5
  11  -2  -6 53.0087 21.6871   5
  11  -2  -5-20.1869 12.4108   5
  11  -2  -4-8.11433 20.9883   5
  11  -2  -4-1.75975 14.1536   7
  11  -2  -3 211.346 57.3455   5
  11  -2  -3 116.167 50.7455   7
  11  -2  -2 8.32281 11.5622   5
  11  -2  -2-14.5377 27.4734   7
  11  -2  -1 34.0864 1.28578   5
  11  -2  -1 14.6431 11.7236   7
  11  -2   0 220.562 54.4855   5
  11  -2   0 165.247 70.0955   7
  11  -2   1 791.833 148.870   7
  11  -2   2 88.6056 39.0792   7
  11  -2   3 615.093 122.798   7
  11  -2   4 183.341 64.7453   7
  11  -2   5-5.01209 6.44695   7
  11  -2   6 199.989 61.7916   7
  11  -2   7 91.7606 33.8507   7
  11  -1  -8 7.47494 9.66329   5
  11  -1  -7 161.612 44.7238   5
  11  -1  -6 1698.47 163.440   5
  11  -1  -5 1786.45 178.964   5
  11  -1  -4 144.418 51.5078   5
  11  -1  -3 407.287 86.8278   5
  11  -1  -3 260.459 69.9037   7
  11  -1  -2 323.650 78.9854   5
  11  -1  -2 325.952 84.1496   7
  11  -1  -1 24.9219 23.7049   5
  11  -1  -1-10.7516 8.55964   7
  11  -1   0 122.908 48.1541   5
  11  -1   0 124.707 55.1119   7
  11  -1   1 271.982 87.0143   7
  11  -1   2 1080.70 169.178   7
  11  -1   3 160.667 57.4203   7
  11  -1   4 351.009 90.0689   7
  11  -1   5 147.673 52.1737   7
  11  -1   6-10.6136 11.3555   7
  11  -1   7 142.464 42.4015   7
  11   0  -7 17.1965 3.69243   5
  11   0  -6 41.1288 23.5265   5
  11   0  -5 294.341 68.4349   5
  11   0  -4 771.420 115.133   5
  11   0  -3 5.41505 2.66113   5
  11   0  -3 32.7465 31.0524   7
  11   0  -2-33.4504 31.1266   5
  11   0  -2 7.08012 25.6833   7
  11   0  -1 87.3210 45.1997   5
  11   0  -1 31.8779 17.2626   7
  11   0   0 603.447 84.6759   5
  11   0   0 522.683 110.660   7
  11   0   1 421.248 99.4354   7
  11   0   2 399.693 97.5106   7
  11   0   3 50.1623 40.6773   7
  11   0   4 276.065 73.4958   7
  11   0   5 96.5774 46.1617   7
  11   0   6 7.87963 21.2732   7
  11   0   7 21.0778 21.0648   7
  11   1  -7 58.6958 22.4003   5
  11   1  -6 44.5370 25.5826   5
  11   1  -5 463.906 80.2015   5
  11   1  -4 46.3397 36.8262   5
  11   1  -3 145.953 44.5548   5
  11   1  -2-8.97129 13.0690   5
  11   1  -2 11.2109 2.89255   7
  11   1  -1 0.70662 14.3358   5
  11   1  -1 3.55324 3.10082   7
  11   1   0-31.6238 29.0546   7
  11   1   1 0.42006 17.2078   7
  11   1   2 17.0601 50.2573   7
  11   1   3 28.8374 15.5135   7
  11   1   4 25.9502 26.0100   7
  11   1   5 5.66932 10.3873   7
  11   1   6 63.3565 29.4347   7
  11   2  -6 100.202 29.4183   5
  11   2  -5-25.9634 19.2652   5
  11   2  -4 45.4894 18.6275   5
  11   2  -3 254.450 55.2485   5
  11   2  -2 175.997 49.6741   5
  11   2  -1-1.46020 15.3540   5
  11   2   0 27.3180 22.7515   7
  11   2   1 14.0649 24.3857   7
  11   2   2 80.0043 33.5445   7
  11   2   3 15.8302 9.67936   7
  11   2   4 379.203 74.6206   7
  11   2   5 209.466 54.8963   7
  11   2   6 24.8863 16.8189   7
  11   3  -4 94.1729 23.7362   5
  11   3  -3 128.785 31.1377   5
  11   3  -2 91.4420 30.6224   5
  11   3   1 46.9724 24.8994   7
  11   3   2 163.579 40.6260   7
  11   3   3 188.178 45.8865   7
  11   3   4 17.7993 11.7135   7
  12  -7  -2 24.8768 16.5370   7
  12  -7  -1 96.5465 33.0079   7
  12  -7   0 71.4460 34.4087   7
  12  -7   1 55.2220 24.3642   7
  12  -6  -3 36.5017 19.6603   7
  12  -6  -2 123.372 44.9061   7
  12  -6  -1 78.9110 38.8510   7
  12  -6   0 25.1986 15.4148   7
  12  -6   1 169.927 56.3822   7
  12  -6   2 164.057 48.8276   7
  12  -5  -4 61.7149 24.9411   7
  12  -5  -3 26.1860 19.1749   7
  12  -5  -2-17.1006 14.3538   7
  12  -5  -1 32.3818 19.3887   7
  12  -5   0 64.9931 33.3970   7
  12  -5   1 281.480 69.1757   7
  12  -5   2 241.705 61.3886   7
  12  -5   3 44.2923 23.2039   7
  12  -4  -4 12.2030 16.8682   7
  12  -4  -3 184.467 52.1331   7
  12  -4  -2 273.302 69.0531   7
  12  -4  -1 30.4579 28.8966   7
  12  -4   0 388.376 83.5708   7
  12  -4   1 367.858 82.2388   7
  12  -4   2 72.4592 40.9350   7
  12  -4   3 23.6951 18.8237   7
  12  -4   4 265.611 57.1282   7
  12  -3  -5 16.2272 5.99573   5
  12  -3  -4-3.56731 12.2140   5
  12  -3  -3 166.426 42.5784   5
  12  -3  -3 98.0567 32.8449   7
  12  -3  -2 135.620 39.1827   5
  12  -3  -2 102.448 42.2083   7
  12  -3  -1 737.848 114.219   7
  12  -3   0 211.050 60.1302   7
  12  -3   1 2.67907 19.6753   7
  12  -3   2-42.3659 29.5107   7
  12  -3   3 31.6281 22.0999   7
  12  -3   4 95.7265 37.1948   7
  12  -2  -5 198.339 40.9442   5
  12  -2  -4 156.595 38.9633   5
  12  -2  -3 427.507 67.0568   5
  12  -2  -3 358.872 66.2259   7
  12  -2  -2 520.840 71.8443   5
  12  -2  -2 468.625 78.1894   7
  12  -2  -1 16.2178 8.13548   5
  12  -2  -1-45.1226 29.4190   7
  12  -2   0-9.93051 21.9583   7
  12  -2   1 155.508 48.5216   7
  12  -2   2 178.896 53.8104   7
  12  -2   3 45.1186 28.6943   7
  12  -2   4 5.86685 13.4318   7
  12  -1  -4 77.5668 24.3023   5
  12  -1  -3 0.98380 13.7948   5
  12  -1  -2 175.086 38.7617   5
  12  -1  -2 221.385 48.1003   7
  12  -1  -1 120.126 40.1858   7
  12  -1   0 98.0605 37.2184   7
  12  -1   1 80.5943 38.9328   7
  12  -1   2 253.012 64.2170   7
  12  -1   3 10.3131 15.3698   7
  12  -1   4 49.1277 19.4508   7
  12   0   0 16.4831 12.3731   7
  12   0   1 15.0292 11.5188   7
  12   0   2 17.7644 15.0739   7
  12   0   3 65.3851 25.8310   7
; 
